# Supplementary material for: Proteome-wide identification of S-sulfenylated cysteines reveals metabolic response to freezing stress after cold acclimation in Brassica napus
Source: Front Plant Sci. 2022 Sep 29;13:1014295. doi: 10.3389/fpls.2022.1014295 (PMC9580371; doi:10.3389/fpls.2022.1014295)
Supplement: Supplementary file 1 [file Table_1.xlsx]

## Sheet: Table S1
Table S1. MaxQuant output intensity of sulfenylated peptides in all samples.
ID	Sequence	Length	Modifications	Modified sequence	Protein accession	Protein description	Charge	m/z	Mass error [ppm]	PEP	Score	MS/MS Count	TCEP_CK1 intensity	TCEP_CK2 intensity	TCEP_CK3 intensity	AS_CK1 intensity	AS_CK2 intensity	AS_CK3 intensity	TCEP_T1 intensity	TCEP_T2 intensity	TCEP_T3 intensity	AS_T1 intensity	AS_T2 intensity	AS_T3 intensity
8	AADQSGTVDLSELLLSFTNCVVCR	24	2 iodo TMT-6plex var	_AADQSGTVDLSELLLSFTNC(io)VVC(io)R_	GSBRNA2T00134057001	cytochrome P450 83B1 [Brassica oleracea var. oleracea]	4	800.677	0.61201	1.918e-09	90.464	1	1952.9	2087.2		0	0		1056.9	1357		230.72	180.53
12	AAEVGQGFWNCPCVPMR	17	2 iodo TMT-6plex var	_AAEVGQGFWNC(io)PC(io)VPMR_	GSBRNA2T00080533001	ferredoxin-thioredoxin reductase catalytic chain, chloroplastic [Brassica napus]	3	841.766	0.35384	3.2616e-21	165.86	1	11839	4243.5	4898.8	767.26	125.01	243.28	9390.3	3796.9	3744.9	403.16	260.45	438.69
15	AAGMALAQHPVVNASCK	17	iodo TMT-6plex var	_AAGMALAQHPVVNASC(io)K_	GSBRNA2T00067386001	dihydrolipoyllysine-residue acetyltransferase component 4 of pyruvate dehydrogenase complex,chloroplastic-like [Brassica oleracea var. oleracea]	3	666.359	0.22325	0.0028526	51.495	1	778.35			1285.7			899.1			1384.1
16	AAGMTCIVTK	10	iodo TMT-6plex var	_AAGMTC(io)IVTK_	GSBRNA2T00068136001	haloacid dehalogenase-like hydrolase domain-containing protein At3g48420 [Brassica napus]	2	662.37	0.27021	0.0094448	65.695	1	3774.7	0	3992	1538.8	0	860.06	3431.6	0	3741.3	1485.4	0	1211.1
18	AAISSSNCPPIITEESCR	18	2 iodo TMT-6plex var	_AAISSSNC(io)PPIITEESC(io)R_	GSBRNA2T00141766001	phosphoglycerate mutase-like protein 1 [Brassica oleracea var. oleracea]	3	846.114	-0.32311	0.0010778	52.569	1	3631.4	5112.7	3194.2	0	357.87	130.42	3900.3	5946.1	4028.4	126.75	228.02	115.95
27	AAQQVNLPVPEGCTDPQADNFDPTAR	26	iodo TMT-6plex var	_AAQQVNLPVPEGC(io)TDPQADNFDPTAR_	GSBRNA2T00124746001	ribulose bisphosphate carboxylase/oxygenase activase, chloroplastic isoform X1 [Brassica napus]	4	771.632	0.18899	4.4479e-06	64.962	2	4206.7	2999.7	1904.4	216.63	0	0	4035	3042.1	1334	331.75	290.83	0
33	AAVEEGIVVGGGCTLLR	17	iodo TMT-6plex var	_AAVEEGIVVGGGC(io)TLLR_	GSBRNA2T00125571001	ruBisCO large subunit-binding protein subunit beta, chloroplastic-like [Brassica napus]	3	658.373	0.33857	6.2265e-11	114.63	1	2695.1	5117.4	2702.4	111.88	807.64	222.49	4257	6475.5	3829.1	515.59	1181.8	778.98
34	AAVGAPDALGDCPFSQR	17	iodo TMT-6plex var	_AAVGAPDALGDC(io)PFSQR_	GSBRNA2T00067818001	glutathione S-transferase DHAR1, mitochondrial-like [Brassica napus]	3	668.677	-0.11383	0.00030302	66.022	1	2901.6	3816.9	2466.9	754.05	1214.1	592.17	3655.7	4317	2775	1495.1	1805.7	948.94
37	AAYALSEGLGVIACIGEK	18	iodo TMT-6plex var	_AAYALSEGLGVIAC(io)IGEK_	GSBRNA2T00108116001	triosephosphate isomerase, chloroplastic [Brassica napus]	3	698.72	0.41804	5.9571e-07	85.563	1	1383.8	2751.8	1165.1	109.41	204.11	234.05	1143.6	2498.3	994.42	281.29	320.35	325.82
23	ACCCPAMK	8	2 iodo TMT-6plex var	_AC(io)C(io)CPAMK_	GSBRNA2T00142241001	---	2	742.884	-0.69116	0.047424	40.103	1			3847.6			453.26			3363.2			523.56
40	ACCSGVTSLNNLAR	14	2 iodo TMT-6plex var	_AC(io)C(io)SGVTSLNNLAR_	GSBRNA2T00075382001	non-specific lipid-transfer protein D-like [Brassica napus]	3	689.712	-0.47097	0.012197	45.347	2	17898	13923	13291	800.95	674.59	955.49	11467	9058.8	8131.2	411.98	550.25	406.57
41	ACCTGVSK	8	2 iodo TMT-6plex var	_AC(io)C(io)TGVSK_	GSBRNA2T00152825001	non-specific lipid-transfer protein A-like [Brassica napus]	3	476.269	-0.091344	0.0059654	71.379	1	39967	37913	34129	5090	2676.6	1231.4	21830	17726	16494	5859.6	2635.4	898.66
43	ACGVNIPYK	9	iodo TMT-6plex var	_AC(io)GVNIPYK_	GSBRNA2T00075382001	non-specific lipid-transfer protein D-like [Brassica napus]	2	647.363	0.35255	0.0059918	78.516	1	7084.8	5363.7	9667.4	757.35	913.26	565.91	5490.7	3846	7423.1	1320.8	875.16	661.33
46	ACGVSVPFPISTNTNCNNVK	20	2 iodo TMT-6plex var	_AC(io)GVSVPFPISTNTNC(io)NNVK_	GSBRNA2T00155289001	non-specific lipid-transfer protein A [Brassica oleracea var. oleracea]	3	908.484	0.057644	1.5631e-14	124.99	2	8757.4	9862.5	5843.4	372.53	314.1	334.08	4589.3	5232	3277.9	283.65	333.7	441.27
48	ACLIGPVHPTFWLSR	15	iodo TMT-6plex var	_AC(io)LIGPVHPTFWLSR_	GSBRNA2T00099126001	2-methyl-6-phytyl-1,4-hydroquinone methyltransferase, chloroplastic [Brassica rapa]	3	676.047	0.19133	6.0957e-07	99.991	1	1966.1	1527.3	1508.8	748.73	602.04	341.27	1535.2	1290.9	1864.7	746.65	671.2	706.07
49	ACPTSADIK	9	iodo TMT-6plex var	_AC(io)PTSADIK_	GSBRNA2T00127736001	60S acidic ribosomal protein P2-2-like [Brassica napus]	2	617.837	-0.17357	0.00070683	108.15	1	5554.8	3310.8	3923.1	1404.8	1354.2	659.15	7994.3	5404.9	4994.1	1708.3	1532.5	1438
51	ACVGLAPENNMILEYK	16	iodo TMT-6plex var	_AC(io)VGLAPENNMILEYK_	GSBRNA2T00131240001	inositol-3-phosphate synthase [Brassica oleracea var. oleracea]	3	698.702	-0.14269	0.010512	42.095	1	932.55			247.27			995.75			362.31
52	ACYGVLR	7	iodo TMT-6plex var	_AC(io)YGVLR_	GSBRNA2T00142068001	40S ribosomal protein S3-2 [Brassica napus]	3	370.881	-0.81642	0.0038727	93.885	1	6551.8	6474.1		1338.5	1114.1		8801.5	9459.5		2170.2	2131
54	ADDCIGPEVESLVASLPEGGVLLLENVR	28	iodo TMT-6plex var	_ADDC(io)IGPEVESLVASLPEGGVLLLENVR_	GSBRNA2T00076479001	phosphoglycerate kinase 1, chloroplastic-like [Brassica napus]	4	806.682	0.43405	0.00023437	43.732	1	262.54			0			115.59			0
58	ADEPVVVDFWAPWCGPCK	18	2 iodo TMT-6plex var	_ADEPVVVDFWAPWC(io)GPC(io)K_	GSBRNA2T00063993001	thioredoxin M-type, chloroplastic-like [Brassica napus]	4	670.097	0.48507	0.00018805	62.658	2	11081	10016	8668.1	539.38	530.82	239.78	8338.8	7602	5941.4	254.46	279.42	248.45
62	ADGPVLVDFWAPWCGPCK	18	2 iodo TMT-6plex var	_ADGPVLVDFWAPWC(io)GPC(io)K_	GSBRNA2T00089042001	thioredoxin M2, chloroplastic-like isoform X2 [Brassica napus]	2	1310.18	-0.77125	0.00017033	65.949	1	4775.2	4799.4	21607	240.62	339.45	1096.1	3527.6	4108.1	17348	0	0	208.63
67	AEEDGVACVEFIAGK	15	iodo TMT-6plex var	_AEEDGVAC(io)VEFIAGK_	GSBRNA2T00156322001	dihydrolipoyl dehydrogenase 1, mitochondrial [Brassica rapa]	3	622.987	0.4785	0.0083525	48.899	1	2069.3	2915.1		128.49	0		1672.1	2466.2		502.66	244.46
71	AEGSDPLEEYCK	12	iodo TMT-6plex var	_AEGSDPLEEYC(io)K_	GSBRNA2T00127099001	calvin cycle protein CP12-2, chloroplastic [Brassica napus]	3	557.27	-0.47985	0.0013933	69.03	1	3235.7	2316		1011.7	461.41		2520.9	1561.6		1200.7	440.88
73	AEMYTGDEICR	11	iodo TMT-6plex var	_AEMYTGDEIC(io)R_	GSBRNA2T00156182001	plant/protein (Protein of unknown function, DUF538) [Arabidopsis thaliana]	2	808.884	0.11519	0.00049572	91.701	1	2314.9			798.76			2767.7			1093.6
74	AENCIVSVNPK	11	Acetyl (Protein N-term),iodo TMT-6plex var	_(ac)AENC(io)IVSVNPK_	GSBRNA2T00156720001	carotenoid 9,10(9',10')-cleavage dioxygenase 1 [Brassica oleracea var. oleracea]	2	772.919	0.041694	0.00046337	90.614	1	1362.5			677.36			1218.3			863.23
78	AETPAGYPCIR	11	iodo TMT-6plex var	_AETPAGYPC(io)IR_	GSBRNA2T00099540001	germin-like protein 1 [Brassica rapa]	3	502.936	-0.1503	0.00026337	92.239	1	8381.8	8880.9	8024.7	1047.9	735.73	445.62	7218.2	8650.5	7663.4	1182.6	704.58	528.74
81	AETPAGYPCIRPIHVK	16	iodo TMT-6plex var	_AETPAGYPC(io)IRPIHVK_	GSBRNA2T00099540001	germin-like protein 1 [Brassica rapa]	4	521.044	-0.45787	0.0028765	53.3	1	2100.7	2075.2	2237.8	336.3	345.32	619.58	2000.1	1869.2	1807.4	566.56	485.84	748.1
92	AFTVQFGSCK	10	iodo TMT-6plex var	_AFTVQFGSC(io)K_	GSBRNA2T00068650001	photosystem I reaction center subunit N, chloroplastic-like [Brassica napus]	3	472.922	-0.74253	0.00022472	98.04	2	14826	12644	14807	435.29	592.23	1177.1	11210	10030	11923	959.01	867.14	744.21
94	AGADIVSVHCEQSSTIHLHR	20	iodo TMT-6plex var	_AGADIVSVHC(io)EQSSTIHLHR_	GSBRNA2T00113550001	ribulose-phosphate 3-epimerase, chloroplastic-like [Brassica napus]	3	830.434	0.11763	0.00013972	62.739	1	1323.8		1170.6	104.44		0	792.92		1087	116.3		0
82	AGCYASNVVIQR	12	iodo TMT-6plex var	_AGC(io)YASNVVIQR_	GSBRNA2T00072862001	adenosine kinase 1 [Brassica napus]	3	537.294	0.39859	0.0011928	69.216	1		1419.4			571			1354.1			677.95
85	AGGLCWLCR	9	2 iodo TMT-6plex var	_AGGLC(io)WLC(io)R_	GSBRNA2T00016333001	bundle-sheath defective protein 2 family [Arabidopsis lyrata subsp. lyrata]	4	409.985	-0.25189	0.010828	58.981	1		14707			2006.3			23499			1164
87	AGGSDPLEEYCK	12	iodo TMT-6plex var	_AGGSDPLEEYC(io)K_	GSBRNA2T00049485001	calvin cycle protein CP12-2, chloroplastic [Brassica rapa]	2	799.39	-0.22601	2.9385e-06	106.67	2		7591.5	1916.4		751.09	840.78		5418.9	1502.6		748.95	722.34
101	AGGSDPLEEYCSDNPETDECR	21	2 iodo TMT-6plex var	_AGGSDPLEEYC(io)SDNPETDEC(io)R_	GSBRNA2T00133000001	calvin cycle protein CP12-1, chloroplastic-like [Brassica napus]	3	982.448	-0.07957	3.9432e-15	118.19	3	23428	23217	13151	1024.4	895.11	610.22	18290	17464	10176	0	0	0
108	AGQAAFGNMCR	11	iodo TMT-6plex var	_AGQAAFGNMC(io)R_	GSBRNA2T00080700001	60S ribosomal protein L4-1-like [Brassica oleracea var. oleracea]	3	485.578	-0.36411	0.017959	50.108	1	4793	3165.3	4417.9	1178.8	1000.8	1414.3	5544.1	5247.4	5888.9	2180.1	1490.8	2219
110	AGSCSSCAGK	10	2 iodo TMT-6plex var	_AGSC(io)SSC(io)AGK_	GSBRNA2T00117151001	ferredoxin, leaf L-A-like [Brassica napus]	4	382.955	-0.33729	0.00052858	90.05	1	99182	101460	88973	6070.9	4720.4	6185.7	88526	91366	78028	3726	824.68	3808.1
126	AICIVHNETATGVTNDISAVR	21	iodo TMT-6plex var	_AIC(io)IVHNETATGVTNDISAVR_	GSBRNA2T00155026001	---	3	838.45	0.35665	3.444e-20	137.89	2		2091	885.15		239.86	305.36		1803.9	1064.4		555.71	132.45
133	AIDCPYPCDK	10	2 iodo TMT-6plex var	_AIDC(io)PYPC(io)DK_	GSBRNA2T00052382001	pectin acetylesterase 3 [Brassica rapa]	3	594.981	0.22328	0.0014577	77.744	2	9045.5	2979.9		1707.7	616.16		6795	1998.5		2144.7	963.56
136	AIFTEGCK	8	iodo TMT-6plex var	_AIFTEGC(io)K_	GSBRNA2T00154888001	chaperonin CPN60, mitochondrial [Brassica rapa]	2	599.329	0.62423	0.0067473	85.161	1	2373.1	3624	3176.1	444.76	372.19	279.84	2722.7	3590.3	3521.3	462.71	626.17	637.96
141	AIPDMACR	8	iodo TMT-6plex var	_AIPDMAC(io)R_	GSBRNA2T00116295001	threonine synthase 1, chloroplastic-like [Brassica oleracea var. oleracea]	3	402.549	-0.58715	0.024511	54.157	1	11009		11038	2696.1		2201.9	11311		11473	3922.2		3844.4
144	ALCADHNINLLTVPSAK	17	iodo TMT-6plex var	_ALC(io)ADHNINLLTVPSAK_	GSBRNA2T00085634001	40S ribosomal protein S12-1 [Brassica napus]	3	703.728	0.13305	5.0697e-06	84.94	1		2898			414.33			3453.6			565.65
152	ALCTGEK	7	iodo TMT-6plex var	_ALC(io)TGEK_	GSBRNA2T00087522001	peptidyl-prolyl cis-trans isomerase-like [Brassica napus]	2	525.794	-0.36081	0.0038614	106.14	1	5831.2	6283.9	11140	616.55	605.39	695.51	6509.4	6196.7	12162	717.71	994.03	786.58
158	ALEGIYACCFR	11	2 iodo TMT-6plex var	_ALEGIYAC(io)C(io)FR_	GSBRNA2T00126387001	calcium homeostasis regulator [Arabidopsis thaliana]	3	635.348	-0.45435	0.0031741	64.82	1	5579.1			582.35			5974.3			705.91
106	ALEVCVK	7	Acetyl (Protein N-term),iodo TMT-6plex var	_(ac)ALEVC(io)VK_	GSBRNA2T00067818001	glutathione S-transferase DHAR1, mitochondrial-like [Brassica napus]	2	566.834	-0.64693	0.01195	76.774	1			2908			1036.1			3888.5			1467.1
166	ALGTCAR	7	iodo TMT-6plex var	_ALGTC(io)AR_	GSBRNA2T00066548001	60S ribosomal protein L10-3-like [Brassica napus]	2	510.795	-0.33166	0.011335	79.146	1	13579	9622.2		2174.2	1750.5		17779	12940		2800.3	2371.2
181	ALQNTCLK	8	iodo TMT-6plex var	_ALQNTC(io)LK_	GSBRNA2T00150881001	probable fructose-bisphosphate aldolase 2, chloroplastic [Brassica napus]	3	407.239	-0.28807	0.0082228	69.825	1	10185	12837	15502	3127.2	4981.1	4662	9718.1	11193	13823	3416	5323.5	4186.7
185	ALSLPTGLGIVCASPK	16	iodo TMT-6plex var	_ALSLPTGLGIVC(io)ASPK_	GSBRNA2T00149960001	serine--glyoxylate aminotransferase-like [Brassica oleracea var. oleracea]	3	619.367	-0.30819	0.00011228	74.141	2	4171.6	3351.3	4215	359.92	562.61	549.92	3372	3427.8	3646.8	709.27	578.17	924.99
190	ALYYLCEAADDAVR	14	iodo TMT-6plex var	_ALYYLC(io)EAADDAVR_	GSBRNA2T00136396001	ferredoxin-dependent glutamate synthase 1, chloroplastic/mitochondrial [Brassica napus]	3	634.659	0.1607	0.0014999	65.219	1	4387.3	9434.3	8753.8	273	252.93	426.28	3079.5	6265.7	5489.2	462.77	420.99	407.92
197	AMVIINPGNPTGQCLSEANLK	21	iodo TMT-6plex var	_AMVIINPGNPTGQC(io)LSEANLK_	GSBRNA2T00073054001	glutamate--glyoxylate aminotransferase 1 [Brassica napus]	3	833.78	0.24157	6.5892e-11	99.092	1	1521.7	1529.1	2122.9	386.88	367.54	297.95	1227.1	1230.2	1933.1	355.63	767.87	1162.4
209	APCIVFIDEIDAVGR	15	iodo TMT-6plex var	_APC(io)IVFIDEIDAVGR_	GSBRNA2T00102109001	ATP-dependent zinc metalloprotease FTSH 1, chloroplastic [Brassica rapa]	3	649.691	0.3478	0.00014476	77.367	2	3141.3	870.26	0	386.71	440.9	238.93	3350.1	1177.6	1247.7	470.68	488.94	388.57
218	AQCPIVER	8	iodo TMT-6plex var	_AQC(io)PIVER_	GSBRNA2T00152637001	40S ribosomal protein S5-1-like [Brassica napus]	2	622.853	0.13577	0.028892	61.48	1	5470.3	8361.1	4792.3	1433.4	2121.2	1574.9	9500.3	11502	7095.4	3031.9	4988.2	2749.2
221	AQFTVDCK	8	iodo TMT-6plex var	_AQFTVDC(io)K_	GSBRNA2T00122736001	trigger factor-like protein TIG, Chloroplastic isoform X2 [Brassica napus]	2	620.832	-0.56406	0.010021	78.149	1	5326.4	6161.1	3155.5	1396.9	1308	816.24	6246.9	7669.5	3815.9	1752.1	2074.7	1005.4
239	ATCPIDTLK	9	iodo TMT-6plex var	_ATC(io)PIDTLK_	GSBRNA2T00135010001	36.4 kDa proline-rich protein [Brassica oleracea var. oleracea]	2	645.868	0.31732	0.010571	68.847	1	3669.5			274.74			3806.3			404.27
245	ATFDCLQK	8	iodo TMT-6plex var	_ATFDC(io)LQK_	GSBRNA2T00123191001	40S ribosomal protein S2-2-like [Brassica napus]	3	418.895	-1.1193	0.045543	40.882	1	3753.6			2249.6			4524.6			2767.9
247	ATGIPYAFAPCIAVCR	16	2 iodo TMT-6plex var	_ATGIPYAFAPC(io)IAVC(io)R_	GSBRNA2T00154184001	---	4	578.576	0.21672	0.0063118	45.614	1	2041.5		2961.2	100.49		111.17	2312.4		3309	0		0
233	ATGQEYAEFLHEFMCAVK	18	iodo TMT-6plex var	_ATGQEYAEFLHEFMC(io)AVK_	GSBRNA2T00152011001	NADP-dependent malic enzyme 2-like [Brassica napus]	4	601.547	0.73359	0.00013445	63.691	2		3288.6			479.3			2248.6			658.08
253	ATQGQVITCK	10	Acetyl (Protein N-term),iodo TMT-6plex var	_(ac)ATQGQVITC(io)K_	GSBRNA2T00158161001	---	2	710.395	0.044467	2.3431e-07	162.26	2	6487.4	5196.5	3850.9	1560.9	576.41	232.89	6184.4	4280.2	3833.6	2196.6	559.95	373.09
173	ATSNICTAQALLANMAAMYAVYHGPAGLK	29	iodo TMT-6plex var	_ATSNIC(io)TAQALLANMAAMYAVYHGPAGLK_	GSBRNA2T00130674001	glycine dehydrogenase (decarboxylating) 1, mitochondrial [Brassica rapa]	4	820.927	0.35006	2.3799e-13	92.412	1	735.3	775.82	660.58	121.76	152.26	0	449.13	758.93	520.43	268.1	0	288.76
243	ATTPGPCDFPSTIVR	15	iodo TMT-6plex var	_ATTPGPC(io)DFPSTIVR_	GSBRNA2T00114885001	nitrilase 2-like [Brassica oleracea var. oleracea]	3	631.003	0.087038	0.01131	46.156	1	8131.4	3064.1	3414.5	1678	507.24	712.61	7606.8	2528.6	2581.4	2580.3	891.08	943.18
262	AVCMISNNTAVAEVFSR	17	iodo TMT-6plex var	_AVC(io)MISNNTAVAEVFSR_	GSBRNA2T00154280001	tubulin alpha-3 chain-like [Brassica napus]	3	714.373	0.31642	3.1676e-06	84.653	1	1269.3			775.77			1081.9			803.7
252	AVECAGCDWIHVDVMDGR	18	2 iodo TMT-6plex var	_AVEC(io)AGC(io)DWIHVDVMDGR_	GSBRNA2T00113550001	ribulose-phosphate 3-epimerase, chloroplastic-like [Brassica napus]	5	527.666	0.2037	0.0048469	40.432	1	4663	6058.5	5295.8	240.84	260.43	372.81	4742.2	6423.2	5628	165.54	354.69	241.71
257	AVGYMIAQCLGAICGVGFVK	20	2 iodo TMT-6plex var	_AVGYMIAQC(io)LGAIC(io)GVGFVK_	GSBRNA2T00095707001	aquaporin PIP2-7-like [Brassica napus]	4	665.373	0.19822	1.3419e-06	79.837	2	2915.9	2581.2		425.51	378.15		1965.6	1362.8		539.9	478.84
182	AVSAIVSCLLGPER	14	iodo TMT-6plex var	_AVSAIVSC(io)LLGPER_	GSBRNA2T00129140001	---	2	872.503	-0.39341	5.4004e-09	145.1	1	5734.3	4415	4307.4	341.57	348.34	377.39	4504.6	3878.5	3220.5	674.39	576.44	391.55
278	AVYECLR	7	iodo TMT-6plex var	_AVYEC(io)LR_	GSBRNA2T00154096001	ribulose 1,5-bisphosphate carboxylase/oxygenase large subunit (chloroplast) [Brassica juncea]	3	394.888	-0.89676	0.0023345	105.2	4	140410	122540	128800	8288.6	6400.3	6836.8	126100	101040	108450	4418.1	2574	2885.4
286	AYCPPGIVEGNPCVEYVR	18	2 iodo TMT-6plex var	_AYC(io)PPGIVEGNPC(io)VEYVR_	GSBRNA2T00157911001	tyrosine--tRNA ligase 2, cytoplasmic-like [Brassica napus]	4	656.849	0.86829	6.9483e-05	67.685	1	4813.7	4180.1		317.78	374.43		4434.1	4112.5		221.77	0
288	AYGFCWGVER	10	iodo TMT-6plex var	_AYGFC(io)WGVER_	GSBRNA2T00126637001	4-hydroxy-3-methylbut-2-enyl diphosphate reductase, chloroplastic [Brassica napus]	3	506.257	0.11553	0.030457	45.126	1	5136.6		2425.2	1003		611.62	6289.9		2918.3	1474.5		899.07
277	AYGIHFATEMCK	12	iodo TMT-6plex var	_AYGIHFATEMC(io)K_	GSBRNA2T00105985001	methylenetetrahydrofolate reductase 1 [Brassica oleracea var. oleracea]	4	425.718	-0.42929	0.024632	40.475	1		3286.4			1429.3			3711			1423.3
278	AYGLGCDWR	9	iodo TMT-6plex var	_AYGLGC(io)DWR_	GSBRNA2T00122300001	leucine--tRNA ligase, cytoplasmic-like [Brassica napus]	3	457.234	-0.17044	0.0181	54.191	1	8068.7	8876.6		3028.1	2370.3		10363	10428		3707.3	2920
191	AYLEFFCSK	9	iodo TMT-6plex var	_AYLEFFC(io)SK_	GSBRNA2T00155584001	---	3	479.586	-0.44791	0.031795	43.77	1			1470.2			587.59			2098.5			816.4
295	CAAVTER	7	iodo TMT-6plex var	_C(io)AAVTER_	GSBRNA2T00129434001	fructose-bisphosphate aldolase, cytoplasmic isozyme-like [Brassica napus]	3	360.201	-0.7129	0.017396	63.054	1	16189	12113	10953	5760.2	1566.8	9282.2	19130	16305	11554	7634.9	1682.9	12828
285	CAAVTETVLSAVYK	14	iodo TMT-6plex var	_C(io)AAVTETVLSAVYK_	GSBRNA2T00157423001	uridine kinase-like protein 4 [Brassica napus]	3	595.332	0.40485	1.3299e-14	139.46	1	1417.3	2000.2	1682.3	647.87	622.4	424.67	1304.6	1748.8	1668.5	604.8	617.58	380.44
301	CAEPWIEVK	9	iodo TMT-6plex var	_C(io)AEPWIEVK_	GSBRNA2T00126221001	psbP domain-containing protein 6, chloroplastic [Brassica rapa]	3	468.59	-0.64195	0.0033377	78.816	1	4788.5	5711.3		1607.5	1854.1		3818	4608.8		1967	2423.5
290	CAHHNNHHEGFMNFMHR	17	iodo TMT-6plex var	_C(io)AHHNNHHEGFMNFMHR_	GSBRNA2T00102833001	catalase-3 [Brassica napus]	4	612.78	-0.10693	9.61e-29	185.67	1	3959.5	2434.9		583.99	509.3		3456	2587.4		727.54	924.48
292	CALQNAASVAGMVLTTQAIVVDKPK	25	iodo TMT-6plex var	_C(io)ALQNAASVAGMVLTTQAIVVDKPK_	GSBRNA2T00045232001	ruBisCO large subunit-binding protein subunit alpha, chloroplastic [Brassica rapa]	4	715.151	0.63988	4.1926e-10	82.885	1	1201.6	696.93		737.63	416.86		1550.3	768.6		1031.8	289.36
306	CALVYGQMNEPPGAR	15	iodo TMT-6plex var	_C(io)ALVYGQMNEPPGAR_	GSBRNA2T00080784001	ATP synthase subunit beta-1, mitochondrial [Raphanus sativus]	3	645.664	0.33722	6.2922e-14	146.79	3	3759.4	5608.6	3492.8	1700.3	2622.1	1092.1	3181	4717.5	3494.3	1799.5	3118.5	1069.7
307	CATITPDEGR	10	iodo TMT-6plex var	_C(io)ATITPDEGR_	GSBRNA2T00124471001	cytosolic isocitrate dehydrogenase [NADP]-like [Brassica oleracea var. oleracea]	2	696.361	-0.01098	0.00036424	99.53	1	6067.4	2219.3		438.96	761.52		6779.2	2795.2		760.9	1112.5
302	CCDAIEDIK	9	2 iodo TMT-6plex var	_C(io)C(io)DAIEDIK_	GSBRNA2T00038397001	non-specific lipid transfer protein GPI-anchored 1-like [Brassica napus]	2	834.447	0.55386	0.015358	58.699	1	8764.2	7977.4	9069.9	855.55	761.72	892.51	6505.2	6523	7218.7	999.39	834.74	1061.7
203	CCDVNCALK	9	3 iodo TMT-6plex var	_C(io)C(io)DVNC(io)ALK_	GSBRNA2T00044762001	defensin-like protein 182 [Brassica napus]	3	652.698	-0.22831	0.016228	50.04	1			2536.2			459.91			2617			617.18
205	CCIAGCSEIR	10	3 iodo TMT-6plex var	_C(io)C(io)IAGC(io)SEIR_	GSBRNA2T00021277001	pyruvate, phosphate dikinase 1, chloroplastic [Brassica rapa]	5	409.231	-0.79811	0.023654	41.399	1		25203	14559		1012.5	583.79		9749	4613.2		2273.8	1850
306	CCLEHAASVAK	11	2 iodo TMT-6plex var	_C(io)C(io)LEHAASVAK_	GSBRNA2T00125571001	ruBisCO large subunit-binding protein subunit beta, chloroplastic-like [Brassica napus]	3	597.332	0.41833	2.9493e-06	116.55	1	6461.1	5090.1	4832.3	806.58	738.24	644.33	9131.9	7381.2	7518.1	234.74	0	0
314	CDGDTYVLDAAEDAEMDLPYSCR	23	2 iodo TMT-6plex var	_C(io)DGDTYVLDAAEDAEMDLPYSC(io)R_	GSBRNA2T00008855001	ferredoxin-1, chloroplastic-like [Brassica napus]	4	803.375	0.35037	1.2144e-11	100.53	2	3804.1	4484		177.5	188.62		2303.4	2703.1		449.69	321.66
210	CDGVIGQLTEDWGETLFSALSK	22	iodo TMT-6plex var	_C(io)DGVIGQLTEDWGETLFSALSK_	GSBRNA2T00102092001	glycerate dehydrogenase HPR, peroxisomal-like [Raphanus sativus]	3	900.125	0.36838	0.00023111	55.705	1	1299.8	912.53	207.24	0	0	0	960.02	864.78	241.73	221.17	323.71	0
317	CDILLLGGGMIFTFYK	16	Oxidation (M),iodo TMT-6plex var	_C(io)DILLLGGGM(ox)IFTFYK_	GSBRNA2T00076479001	phosphoglycerate kinase 1, chloroplastic-like [Brassica napus]	3	712.719	0.51548	0.0026107	54.281	1	682.07			255.07			511.67			242.26
312	CEAAPGCGEWK	11	2 iodo TMT-6plex var	_C(io)EAAPGC(io)GEWK_	GSBRNA2T00027418001	calnexin homolog 1-like [Brassica napus]	3	603.644	0.082081	1.9088e-05	102.4	1	5376.1	4729.5	5542.4	689.72	605.65	602.04	6907.4	5687.5	7112.6	947.71	861.53	694.74
213	CEEAIPLDAWVPADDVLPLCGAVLEAFR	28	2 iodo TMT-6plex var	_C(io)EEAIPLDAWVPADDVLPLC(io)GAVLEAFR_	GSBRNA2T00088147001	ferredoxin--nitrite reductase, chloroplastic-like [Brassica napus]	4	918.49	0.5267	2.5745e-07	71.097	1	2552.3	2747.9	2268.1	0	0	0	2352.7	2727.6	2072.6	0	0	0
321	CEEICLSGGLVR	12	2 iodo TMT-6plex var	_C(io)EEIC(io)LSGGLVR_	GSBRNA2T00144393001	60S ribosomal protein L13a-4 [Brassica napus]	4	485.023	-0.29054	0.00038502	80.623	1	4654.6	6397.8	11562	651.02	643.03	1741.8	6139.9	8683	16177	656.77	240.44	1810.9
217	CESACPTDFLSVR	13	2 iodo TMT-6plex var	_C(io)ESAC(io)PTDFLSVR_	GSBRNA2T00152253001	photosystem I subunit VII (plastid) [Tofieldia thibetica]	2	1043.54	-1.0436	0.0043973	60.157	1	19312	16380	6309.3	406.67	256.9	337.19	11732	9727.9	3586.4	489.58	0	0
325	CETAPGCGEWK	11	2 iodo TMT-6plex var	_C(io)ETAPGC(io)GEWK_	GSBRNA2T00145774001	calnexin homolog 1-like [Brassica napus]	4	460.488	-0.82822	0.024991	42.243	1	4901.6	4290.6		741.77	645.09		5159.9	4829.6		916.29	1056.5
218	CFCSSEELVK	10	2 iodo TMT-6plex var	_C(io)FC(io)SSEELVK_	GSBRNA2T00141705001	glutamate--tRNA ligase, chloroplastic/mitochondrial-like [Brassica napus]	3	601.656	-1.183	0.0030153	70.056	1	7277.4	4371.2	3112.6	1461.3	1028.1	314.4	9928	5803.6	3972.8	1518	1324.7	626.61
219	CFLELQVDGEEAYQTFQR	18	iodo TMT-6plex var	_C(io)FLELQVDGEEAYQTFQR_	GSBRNA2T00069636001	elongation factor 2 [Brassica napus]	3	835.748	-0.023012	1.0899e-06	93.226	1	1169.8	1022	718.04	161.41	0	226.49	1118.1	703.13	593.23	0	113.87	120.43
220	CFLMWQYPWYPK	12	iodo TMT-6plex var	_C(io)FLMWQYPWYPK_	GSBRNA2T00102711001	probable phosphoribosylformylglycinamidine synthase, chloroplastic/mitochondrial [Brassica napus]	3	664.335	0.1857	0.00066908	81.017	1	1662.3	1434.2	1331.7	452.78	308.19	394.7	1783.2	2102.2	1424.2	608.82	550.01	526.11
331	CFPCWDEPACK	11	3 iodo TMT-6plex var	_C(io)FPC(io)WDEPAC(io)K_	GSBRNA2T00081279001	---	4	572.3	-0.28927	0.017682	46.73	1	7624.3			2398.9			7545			2246
329	CFVDCVDSFTR	11	2 iodo TMT-6plex var	_C(io)FVDC(io)VDSFTR_	GSBRNA2T00096509001	mitochondrial import inner membrane translocase subunit TIM9 [Brassica napus]	4	488.255	0.24056	0.00051862	79.86	1		9116.5	9916.6		768.8	619.04		10352	10263		799.69	404.89
223	CFVGGLAWATADADLER	17	iodo TMT-6plex var	_C(io)FVGGLAWATADADLER_	GSBRNA2T00061124001	glycine-rich RNA-binding protein 10-like [Brassica napus]	3	708.696	0.14226	5.1403e-05	75.911	1	922.9	1680.8	1111.3	0	209.92	0	1400.3	1976.3	1270.5	271.07	207.72	129.27
225	CFVGGLAWATDDR	13	iodo TMT-6plex var	_C(io)FVGGLAWATDDR_	GSBRNA2T00008564001	glycine-rich RNA-binding protein GRP1A isoform X1 [Brassica napus]	2	870.44	-0.2601	0.0010273	85.522	1	4473.1	2381.9	1849.8	325.56	361.76	137.5	7077.2	8360	7356.2	343.38	247.31	376.06
334	CFVGGLAWATGDAELER	17	iodo TMT-6plex var	_C(io)FVGGLAWATGDAELER_	GSBRNA2T00073961001	glycine-rich RNA-binding protein 10-like isoform X1 [Brassica napus]	3	708.696	0.16555	2.9424e-09	110.35	1	1265.1	1780.7	1865.8	224.04	294.34	150.18	2065.3	2163.1	2295.1	280.97	300.59	358.02
336	CGLTSSNYSELSHLYEK	17	iodo TMT-6plex var	_C(io)GLTSSNYSELSHLYEK_	GSBRNA2T00091439001	phospholipid hydroperoxide glutathione peroxidase 1, chloroplastic-like [Brassica napus]	4	565.783	0.49363	9.8119e-05	68.576	1		1972.4			299.29			1443.3			526.55
228	CGPLVDLCR	9	2 iodo TMT-6plex var	_C(io)GPLVDLC(io)R_	GSBRNA2T00133724001	threonine--tRNA ligase, mitochondrial-like [Brassica napus]	4	409.238	-1.2408	0.001593	83.783	1	15085	15578	9336.2	2200.7	4295.1	1094	17496	18763	11710	2097.2	4043.2	1031.1
339	CGSNVFWK	8	iodo TMT-6plex var	_C(io)GSNVFWK_	GSBRNA2T00068650001	photosystem I reaction center subunit N, chloroplastic-like [Brassica napus]	2	635.334	-0.25793	0.00027678	148.99	1	7793.6	7810.8	7317.7	210.66	370.76	618.51	6893.8	6224.2	5534.9	637.65	256.84	525.17
340	CGSVTVR	7	iodo TMT-6plex var	_C(io)GSVTVR_	GSBRNA2T00123191001	40S ribosomal protein S2-2-like [Brassica napus]	3	350.869	-0.23145	0.0041667	98.418	1	17842	13822		3710.7	3312.7		22025	16223		6089.4	5490.6
345	CHFVAIDIFTAK	12	iodo TMT-6plex var	_C(io)HFVAIDIFTAK_	GSBRNA2T00142474001	eukaryotic translation initiation factor 5A-2-like isoform X1 [Brassica oleracea var. oleracea]	4	424.238	-0.22983	2.1259e-05	99.283	1	1789.2		2109.5	324.41		499.56	2330.5		2556.5	398.39		604.83
235	CHTILNCAR	9	2 iodo TMT-6plex var	_C(io)HTILNC(io)AR_	GSBRNA2T00098574001	succinate dehydrogenase [ubiquinone] iron-sulfur subunit 2, mitochondrial-like [Brassica napus]	3	563.653	-0.51854	0.0053939	68.224	1	11859	10411	4985.5	768.66	983.59	529.52	9265.5	8974.6	4470.5	889.37	1070.3	674.78
347	CICPDSK	7	2 iodo TMT-6plex var	_C(io)IC(io)PDSK_	GSBRNA2T00131877001	probable mitochondrial adenine nucleotide transporter BTL2 [Brassica napus]	2	712.394	0.60152	0.029779	51.572	1		2721.5			653.39			2510.8			764.99
236	CICYFPC	7	3 iodo TMT-6plex var	_C(io)IC(io)YFPC(io)_	GSBRNA2T00146665001	defensin-like protein 3 [Brassica napus]	4	459.754	-1.0693	0.0052849	78.002	2	16848	27324	26183	568.85	878.45	837.7	6676	9783.9	9274.4	340.06	287.43	218.91
350	CIGATTLDEYR	11	iodo TMT-6plex var	_C(io)IGATTLDEYR_	GSBRNA2T00151751001	chaperone protein ClpB3, chloroplastic-like [Brassica napus]	3	524.275	-0.29025	0.0076757	57.175	1		1560.2			886.96			1361.8			1198.3
352	CIQGAAR	7	iodo TMT-6plex var	_C(io)IQGAAR_	GSBRNA2T00129290001	non-specific lipid-transfer protein 5 [Brassica napus]	2	524.3	-0.10634	0.0047011	108.98	1	11822	12572		740.55	669.76		11139	10356		497.68	515.52
352	CIWGFGDGSTIPVFDTPIGK	20	iodo TMT-6plex var	_C(io)IWGFGDGSTIPVFDTPIGK_	GSBRNA2T00059082001	bifunctional nitrilase/nitrile hydratase NIT4 [Brassica napus]	3	813.758	0.40566	0.0011524	51.566	1	790.81	1181.8		0	287.69		660.72	884.53		306.72	467.38
241	CIWGYGDGSTIPVYDTPLGK	20	iodo TMT-6plex var	_C(io)IWGYGDGSTIPVYDTPLGK_	GSBRNA2T00114885001	nitrilase 2-like [Brassica oleracea var. oleracea]	3	824.421	0.087197	5.7544e-11	119.8	1	1685.3	2576.3	1607.9	0	0	0	1311.3	2240.3	1376.9	213.45	251.58	0
357	CLCTDPGLLLPR	12	2 iodo TMT-6plex var	_C(io)LC(io)TDPGLLLPR_	GSBRNA2T00154845001	plastidial pyruvate kinase 1, chloroplastic [Brassica rapa]	4	490.538	0.62979	8.8643e-05	86.014	1		3838.3			834.99			7025.9			511.16
244	CLCYVIQQAK	10	2 iodo TMT-6plex var	_C(io)LC(io)YVIQQAK_	GSBRNA2T00038397001	non-specific lipid transfer protein GPI-anchored 1-like [Brassica napus]	4	457.515	-0.74656	0.0019005	74.376	1		8054.5	5618.3		422.9	388.86		5212.2	4152.3		372.22	862.93
359	CLEEYGGDVGPTFCNPK	17	2 iodo TMT-6plex var	_C(io)LEEYGGDVGPTFC(io)NPK_	GSBRNA2T00045117001	defensin-like protein 197 [Brassica napus]	4	622.566	-0.23292	7.8086e-18	142.91	2	7309	10197	2705.3	373.28	416.6	0	6171.2	7770	2349.6	833.92	360.52	0
363	CLIPCAIDQDPYFR	14	2 iodo TMT-6plex var	_C(io)LIPC(io)AIDQDPYFR_	GSBRNA2T00044535001	---	4	578.813	0.28615	3.0414e-05	89.231	1		2815.5			119.51			3150.4			322.81
364	CLTGDCGNK	9	2 iodo TMT-6plex var	_C(io)LTGDC(io)GNK_	GSBRNA2T00072343001	pathogenesis-related protein 5-like [Brassica oleracea var. oleracea]	4	392.963	-0.65405	0.028649	41.876	1		11370			960.22			8060.1			1111.7
367	CLVGAANSFPTLNAAR	16	iodo TMT-6plex var	_C(io)LVGAANSFPTLNAAR_	GSBRNA2T00155291001	non-specific lipid-transfer protein B [Brassica oleracea var. oleracea]	3	645.354	0.55536	2.9276e-14	133.48	1	4126.7	1356.8	2832.6	449.9	468.84	332.09	2512.6	1150.9	1655.4	496.11	453.45	450.24
251	CNCVPPGTYGNYDK	14	2 iodo TMT-6plex var	_C(io)NC(io)VPPGTYGNYDK_	GSBRNA2T00103686001	gibberellin-regulated protein 1 [Brassica napus]	4	548.028	-0.77271	0.0072022	47.622	2	10928	10607	9303.3	999.48	842.31	1104	6646	6728.1	6197	1309.7	841.05	1154.3
252	CNMQIDPAK	9	iodo TMT-6plex var	_C(io)NMQIDPAK_	GSBRNA2T00135625001	mitochondrial phosphate carrier protein 3, mitochondrial-like [Brassica napus]	2	674.849	-0.22892	0.0064343	82.287	1	4773.8	4855.8	2423.3	2238.2	2137.6	862.65	4579.3	3994	2292	2383	2186.3	979.89
373	CNVLVNIEQQSPDIAQGVHGHLTK	24	iodo TMT-6plex var	_C(io)NVLVNIEQQSPDIAQGVHGHLTK_	GSBRNA2T00053936001	S-adenosylmethionine synthase 3 [Brassica napus]	5	586.716	0.32172	1.6037e-08	82.177	1	1469.2	435.9	560.8	382.42	0	287.36	1763.2	488.48	709.01	759.01	119.75	287.71
374	CPEVLFQPSFVGMEAAGIHETTYNSIMK	28	iodo TMT-6plex var	_C(io)PEVLFQPSFVGMEAAGIHETTYNSIMK_	GSBRNA2T00153994001	actin-2 [Brassica napus]	4	857.928	0.42014	6.9012e-12	83.467	1	2454.7	1312.8	1852.2	0	230.41	178.04	2375.4	1851.3	2566.5	118.84	230.39	662.08
374	CPEVLFQPSLIGMEAPGIHETTYNSIMK	28	iodo TMT-6plex var	_C(io)PEVLFQPSLIGMEAPGIHETTYNSIMK_	GSBRNA2T00135952001	actin-7-like [Brassica napus]	4	859.439	0.20302	9.5407e-09	71.297	1	630.15	1083		274.76	278.28		782.75	883.24		452.77	0
376	CPFTGTVSIR	10	iodo TMT-6plex var	_C(io)PFTGTVSIR_	GSBRNA2T00146079001	40S ribosomal protein S11-3-like [Brassica napus]	3	470.597	-0.31752	0.00069247	89.827	1	4037.7	6769.5		2005.1	2966.4		5822.3	10439		3078.6	5005.8
377	CPLIFGDWDVVYCSR	15	2 iodo TMT-6plex var	_C(io)PLIFGDWDVVYC(io)SR_	GSBRNA2T00154262001	probable plastid-lipid-associated protein 8, chloroplastic [Brassica napus]	4	608.572	-0.26341	9.3839e-05	79.652	1	5141.2	4198.2		504.58	251.95		6228	6074		298.63	346.19
378	CPMPISTYFR	10	iodo TMT-6plex var	_C(io)PMPISTYFR_	GSBRNA2T00157851001	UPF0051 protein ABCI8, chloroplastic-like [Brassica napus]	3	515.27	-0.0088966	0.00019109	97.965	2		5674.3			1912.4			7649.9			3190.3
258	CQCYATLTTHGGR	13	2 iodo TMT-6plex var	_C(io)QC(io)YATLTTHGGR_	GSBRNA2T00103686001	gibberellin-regulated protein 1 [Brassica napus]	3	690.364	-0.57979	1.9667e-05	108.58	1	17242	13536	17342	841.02	580.15	782.51	12553	10484	12342	397.48	393.3	323.83
385	CQEMEEEAK	9	iodo TMT-6plex var	_C(io)QEMEEEAK_	GSBRNA2T00122736001	trigger factor-like protein TIG, Chloroplastic isoform X2 [Brassica napus]	2	713.331	0.48764	1.1588e-05	152.54	1	2508.6	2885.7		713.01	1141.5		2805.6	3206.6		921.95	1277.1
387	CQSQAVK	7	iodo TMT-6plex var	_C(io)QSQAVK_	GSBRNA2T00136111001	gibberellin 20 oxidase 3-like [Brassica napus]	2	546.805	0.47663	0.036197	60.478	1	4489.7			891.06			5035			1242.9
388	CSACAYPAAR	10	2 iodo TMT-6plex var	_C(io)SAC(io)AYPAAR_	GSBRNA2T00114226001	60S ribosomal protein L37-2-like [Brassica napus]	4	418.477	-0.89428	0.001871	74.173	1	5161.5	7998.1	6432.2	745.84	995.37	1013.1	7909.3	12448	9778.1	1271.5	1513.9	1074.1
384	CSDAHAIADAAVK	13	iodo TMT-6plex var	_C(io)SDAHAIADAAVK_	GSBRNA2T00130674001	glycine dehydrogenase (decarboxylating) 1, mitochondrial [Brassica rapa]	2	800.919	0.9102	4.9682e-06	98.592	2	4683.8	4795	3378.4	636.91	1086.4	359.7	4012.7	4700.2	3356.9	862.99	1044.8	326.62
266	CSDVSSTIDSSLTMVMGDDMVK	22	iodo TMT-6plex var	_C(io)SDVSSTIDSSLTMVMGDDMVK_	GSBRNA2T00105394001	glyceraldehyde-3-phosphate dehydrogenase GAPA2, chloroplastic [Brassica napus]	4	663.312	0.37127	7.9414e-06	64.522	1	956.84	847.66	457.1	389.93	112.44	266.98	827.99	707.89	733.19	441.54	311.94	279.09
268	CSELYLSQFR	10	iodo TMT-6plex var	_C(io)SELYLSQFR_	GSBRNA2T00103596001	mannose-1-phosphate guanyltransferase alpha-like isoform X1 [Brassica napus]	3	525.611	-0.86135	0.016373	53.028	1	3752.9		3364.3	797.61		417.3	3559.2		2743	1129.3		706.94
397	CSGEGIYFAAK	11	iodo TMT-6plex var	_C(io)SGEGIYFAAK_	GSBRNA2T00050963001	geranylgeranyl diphosphate reductase, chloroplastic [Brassica napus]	3	492.257	-0.4291	0.00042445	87.568	1	2586.1	3362.5		1454.9	1662.2		2870.5	3517.7		1639.7	2379.3
392	CSPAVDER	8	iodo TMT-6plex var	_C(io)SPAVDER_	GSBRNA2T00010581001	myrosinase-like [Brassica rapa]	3	402.543	-0.17396	0.024449	52.255	1	7505.8	6957.2	8297.7	1448.8	1889.4	1308.5	5668.4	4656.4	4983.2	2350.3	2337	2215
400	CSPEVDEK	8	iodo TMT-6plex var	_C(io)SPEVDEK_	GSBRNA2T00063713001	myrosinase-like [Brassica napus]	3	412.543	-0.78656	0.010314	67.494	1	11503			1984.1			9713.6			3058
401	CSPMVDTK	8	iodo TMT-6plex var	_C(io)SPMVDTK_	GSBRNA2T00058697001	myrosinase-like isoform X1 [Brassica napus]	2	605.312	0.087774	0.0020053	126.62	1	3354.1	3596.8		724.3	634.56		3244	3840.5		700.48	563.49
403	CSQTQYHNACILFCNK	16	3 iodo TMT-6plex var	_C(io)SQTQYHNAC(io)ILFC(io)NK_	GSBRNA2T00151763001	gibberellin-regulated protein 4-like [Brassica napus]	5	572.906	-0.49981	0.0050391	46.156	1	2669.7			0			2084.4			316.02
405	CSSLLAQR	8	iodo TMT-6plex var	_C(io)SSLLAQR_	GSBRNA2T00115679001	abscisic acid receptor PYR1-like [Raphanus sativus]	3	402.899	-0.48261	0.0027612	93.195	1	6025.7			1961.4			4578.3			2102.1
395	CSSTPEPK	8	iodo TMT-6plex var	_C(io)SSTPEPK_	GSBRNA2T00021171001	AP2/ERF and B3 domain-containing transcription factor At1g51120-like [Brassica oleracea var.oleracea]	2	589.308	0.54473	0.039978	56.122	1		900.93			906			976.01			943.01
406	CSWLVVK	7	iodo TMT-6plex var	_C(io)SWLVVK_	GSBRNA2T00041597001	farnesyl pyrophosphate synthase 2 [Brassica rapa]	3	388.565	-0.66062	0.0066127	78.616	1	2978.2			1589.3			3859.5			1614.6
273	CTGDIIAQCPAQLR	14	2 iodo TMT-6plex var	_C(io)TGDIIAQC(io)PAQLR_	GSBRNA2T00008668001	thaumatin-like protein 1 [Brassica oleracea var. oleracea]	3	716.399	-0.57646	9.3837e-05	90.793	1	6821.1		10604	233.83		342.87	1982.8		3430.3	304.91		376.98
408	CTNCGTAMEYDSGSR	15	2 iodo TMT-6plex var	_C(io)TNC(io)GTAMEYDSGSR_	GSBRNA2T00072712001	PGR5-like protein 1A, chloroplastic [Brassica napus]	3	751.687	0.51126	4.1348e-07	101.42	1	9594	11443		534.36	527.43		7490.2	9510.9		377.16	537.91
410	CVAHLTGDGIAFCDLGPVDTMLPGEV	26	2 iodo TMT-6plex var	_C(io)VAHLTGDGIAFC(io)DLGPVDTMLPGEV_	GSBRNA2T00114988001	---	3	1096.9	-0.43453	6.0122e-06	62.589	1	1686.2	2389.7	1967	254.3	115.96	289.93	1459.9	2153.8	1350.1	246.4	235.73	0
411	CVATLLHEMK	10	iodo TMT-6plex var	_C(io)VATLLHEMK_	GSBRNA2T00095199001	3-ketoacyl-CoA thiolase 2, peroxisomal [Brassica rapa]	3	491.942	0.14935	0.00059173	91.549	1	1748.7			814.92			1844.1			1176.2
413	CVKPLLEYQACVK	13	2 iodo TMT-6plex var	_C(io)VKPLLEYQAC(io)VK_	GSBRNA2T00059783001	cytochrome b-c1 complex subunit 6-like [Brassica rapa]	5	431.254	-0.25489	0.00062764	69.554	1	5336	5653.6		607.03	619.69		4836.2	5488.9		488.84	747.04
416	CVKPPVIYGDVSR	13	iodo TMT-6plex var	_C(io)VKPPVIYGDVSR_	GSBRNA2T00143127001	---	4	441.253	-0.90375	0.00013102	84.365	1	4954.7	4382.8	2571.7	603.85	811.62	867.63	2587.2	6577.7	3634.5	894.36	1681.3	944.43
279	CVKPPVIYGDVSRPK	15	iodo TMT-6plex var	_C(io)VKPPVIYGDVSRPK_	GSBRNA2T00140666001	---	5	398.233	-2.0677	0.012543	42.958	1		1496.4	1988.6		371.18	613.67		2274.5	2505.1		472.14	726.11
280	CVLSTSD	7	iodo TMT-6plex var	_C(io)VLSTSD_	GSBRNA2T00070996001	alcohol dehydrogenase class-3 [Brassica napus]	2	527.276	-0.83628	0.020729	77.748	1		4409.3	2156.5		1080.8	873.86		3756.8	1625.8		1391.9	923.49
417	CVTKPGSSLSSGESSCVSR	19	2 iodo TMT-6plex var	_C(io)VTKPGSSLSSGESSC(io)VSR_	GSBRNA2T00103622001	mitochondrial import inner membrane translocase subunit TIM13-like [Brassica napus]	4	633.085	0.019034	0.0029017	42.633	1	3025.8	1380.1		0	214.68		2902.8	1450.2		259.56	275.71
418	CVVVEDSAIGLAAAK	15	iodo TMT-6plex var	_C(io)VVVEDSAIGLAAAK_	GSBRNA2T00068136001	haloacid dehalogenase-like hydrolase domain-containing protein At3g48420 [Brassica napus]	3	592.336	0.58399	3.1728e-15	142.38	1	2125.4	1755.4	1170.3	347.89	570.14	295.1	1396.9	1165.4	807.77	664.87	424.97	496.13
420	CWEDGVTPWDQGR	13	iodo TMT-6plex var	_C(io)WEDGVTPWDQGR_	GSBRNA2T00022017001	probable thiocyanate methyltransferase 2 [Brassica napus]	3	626.632	0.52583	4.1709e-05	91.62	1	1480	1307.7		713.67	723.36		1716.7	1583.7		699.32	814.5
425	CWEDIFDAITNAK	13	iodo TMT-6plex var	_C(io)WEDIFDAITNAK_	GSBRNA2T00018169001	phospholipase D alpha 2 [Brassica napus]	3	618.98	-0.052568	2.6261e-05	96.059	1	1261.9			392.15			1633.5			457.51
422	CYDFWMDFSECMSHCR	16	3 iodo TMT-6plex var	_C(io)YDFWMDFSEC(io)MSHC(io)R_	GSBRNA2T00127135001	NADH dehydrogenase [ubiquinone] iron-sulfur protein 5-B-like [Brassica napus]	4	762.607	0.065798	0.0051192	46.68	1		14025			818.15			11376			423.24
424	CYESYSEDYR	10	iodo TMT-6plex var	_C(io)YESYSEDYR_	GSBRNA2T00154184001	---	2	822.364	0.59867	5.6421e-05	119.53	1		7780.9			367.51			7551.3			595.48
426	CYFSIACLLHPK	12	2 iodo TMT-6plex var	_C(io)YFSIAC(io)LLHPK_	GSBRNA2T00015180001	aspartic proteinase A1-like [Brassica napus]	5	411.436	-0.60122	0.013913	47.154	1	8644.5	4932.2		1158	678.61		14128	7412.6		694.01	247.86
431	DAEETCAGDPVSGECVAAWDEVEELSAAASHAR	33	2 iodo TMT-6plex var	_DAEETC(io)AGDPVSGEC(io)VAAWDEVEELSAAASHAR_	GSBRNA2T00099095001	calvin cycle protein CP12-2, chloroplastic-like [Brassica rapa]	3	1345.3	-0.60711	4.8195e-11	73.227	1	3352.6	3317.7	3658.9	137.25	118.52	173.32	2441	2278.2	2684.9	0	0	0
289	DALIALGCMEHR	12	iodo TMT-6plex var	_DALIALGC(io)MEHR_	GSBRNA2T00136396001	ferredoxin-dependent glutamate synthase 1, chloroplastic/mitochondrial [Brassica napus]	3	553.295	-0.5682	0.00057471	84.365	1	7690.4		4895.2	963.62		677.55	5279.5		3905.5	1262.9		578.56
437	DAVTHLTDAQEWAGGGSMVGALVGSCQR	28	iodo TMT-6plex var	_DAVTHLTDAQEWAGGGSMVGALVGSC(io)QR_	GSBRNA2T00114576001	phosphoglycolate phosphatase 1B, chloroplastic [Brassica napus]	3	1049.18	-0.11159	5.7667e-16	104.05	1		1841			348.42			1570.4			303.88
445	DCCGGFDQVITK	12	2 iodo TMT-6plex var	_DC(io)C(io)GGFDQVITK_	GSBRNA2T00114076001	protein YLS3-like [Brassica napus]	3	648.674	-0.012801	0.0045201	57.175	1	3364.2			517.37			2315.5			548.55
446	DCEEWFFDR	9	iodo TMT-6plex var	_DC(io)EEWFFDR_	GSBRNA2T00156755001	chloroplast stem-loop binding protein of 41 kDa a, chloroplastic [Brassica oleracea var. oleracea]	3	525.908	0.10013	0.0003516	109.66	1	1954.5	2562.8	3202.6	311	585.92	593.79	1694.3	2512.9	2861	459.46	680.69	864.3
442	DCWLIISGK	9	iodo TMT-6plex var	_DC(io)WLIISGK_	GSBRNA2T00078997001	cytochrome b5 [Brassica rapa]	2	682.384	0.09256	0.026446	59.908	1		2723.9			740.81			2386.7			843.07
299	DDPTSLFTCPSGTNYNVIFCP	21	2 iodo TMT-6plex var	_DDPTSLFTC(io)PSGTNYNVIFC(io)P_	GSBRNA2T00008668001	thaumatin-like protein 1 [Brassica oleracea var. oleracea]	3	983.822	-0.40897	0.00013642	58.693	1	16579	3681.8	3865	228.56	0	0	4993.4	1220.8	875.43	0	0	0
452	DECAYQEMITHLPLCSIPNPK	21	2 iodo TMT-6plex var	_DEC(io)AYQEMITHLPLC(io)SIPNPK_	GSBRNA2T00033208001	spermidine synthase 1-like [Brassica rapa]	4	765.898	0.077311	2.0222e-06	72.801	1	1304.8	1572.4	1661.7	0	0	0	1655.3	1379.6	1851.2	306.9	261.5	291.46
302	DEEGNCYFR	9	iodo TMT-6plex var	_DEEGNC(io)YFR_	GSBRNA2T00136042001	porphobilinogen deaminase, chloroplastic [Brassica napus]	2	731.335	-0.81647	0.033752	59.908	1			2987.8			681.55			4038.6			900.34
453	DEFCLCHLSTGDMLR	15	2 iodo TMT-6plex var	_DEFC(io)LC(io)HLSTGDMLR_	GSBRNA2T00094594001	adenylate kinase 4 [Brassica rapa]	4	600.307	0.13644	0.0056936	50.305	1		2033.5	1976.9		291.95	380.54		1587.8	1758.2		263.18	442.83
458	DEFELTMALSGCR	13	iodo TMT-6plex var	_DEFELTMALSGC(io)R_	GSBRNA2T00067280001	peroxisomal (S)-2-hydroxy-acid oxidase GLO1-like isoform X1 [Brassica napus]	3	600.966	0.020093	6.5963e-05	91.62	1	2922.2	3167.6	3154	370.59	479.66	515.84	2672.6	2627.5	2025.8	529.05	536.57	402.31
460	DFADGELKDELFCIR	15	iodo TMT-6plex var	_DFADGELKDELFC(io)IR_	GSBRNA2T00145101001	Ran-binding protein 2, Ran-binding domain protein [Medicago truncatula]	3	700.693	0.11726	0.00031541	71.98	1	2403.9			969.02			2727.4			693.03
462	DFETAYSASFYPCMEILYECYEDVAAGSEIR	31	2 iodo TMT-6plex var	_DFETAYSASFYPC(io)MEILYEC(io)YEDVAAGSEIR_	GSBRNA2T00155699001	---	4	1058.5	0.01397	9.874e-13	90.299	2	2479.8			353.69			3351.9			0
310	DFGCGVELINR	11	iodo TMT-6plex var	_DFGC(io)GVELINR_	GSBRNA2T00066689001	Transcriptional coactivator/pterin dehydratase [Arabidopsis thaliana]	3	517.943	-0.84466	0.0041237	63.944	1		2220.3	1510.8		686.75	1387.1		6304.4	3614.4		1020	1752.1
311	DFGIECR	7	iodo TMT-6plex var	_DFGIEC(io)R_	GSBRNA2T00144298001	GDP-mannose 3,5-epimerase-like [Brassica napus]	2	584.803	-0.58878	0.012261	89.142	1			8117.2			679.23			10131			584.27
465	DFGYSFPCDGPGR	13	iodo TMT-6plex var	_DFGYSFPC(io)DGPGR_	GSBRNA2T00108809001	PSI P700 apoprotein A2 (chloroplast) [Aethionema grandiflorum]	2	873.909	0.41843	2.7869e-09	137.95	2	15920	14637	17870	609.25	779.74	1359	10675	10445	13376	1290	1364.9	1505.1
466	DFPSYVECQEK	11	iodo TMT-6plex var	_DFPSYVEC(io)QEK_	GSBRNA2T00117685001	alpha-glucan phosphorylase 1-like isoform X1 [Brassica napus]	2	837.406	0.088523	0.0016559	79.659	1	1525.6			507.56			1163.8			560.1
314	DFVCVENAK	9	iodo TMT-6plex var	_DFVC(io)VENAK_	GSBRNA2T00081671001	putative glucose-6-phosphate 1-epimerase isoform X2 [Brassica rapa]	2	677.355	-0.96952	0.00095303	142.98	1			3476.7			586.95			2417.6			763.88
470	DHACVVGTYR	10	iodo TMT-6plex var	_DHAC(io)VVGTYR_	GSBRNA2T00157577001	mediator of RNA polymerase II transcription subunit 36a-like [Brassica napus]	2	725.377	0.46469	0.023197	54.486	1	2257.2			649.96			4680.1			886.47
465	DHGFEILAFPCNQFGNQEPGSNEEIVQFACTR	32	2 iodo TMT-6plex var	_DHGFEILAFPC(io)NQFGNQEPGSNEEIVQFAC(io)TR_	GSBRNA2T00064278001	probable phospholipid hydroperoxide glutathione peroxidase 6, mitochondrial [Brassica napus]	4	1064.77	-0.55515	2.2025e-05	51.758	1	2526.4	2077.9		0	0		2963.2	2397.2		136.08	124.14
331	DLCDLIAAGR	10	iodo TMT-6plex var	_DLC(io)DLIAAGR_	GSBRNA2T00118676001	60S acidic ribosomal protein P2-2-like [Brassica napus]	2	688.382	-0.056845	0.00045338	107.58	1	6883.1	5900.1	4813.5	791.47	762.07	532.47	9676.5	8284.9	7077.7	1281.9	1150	983.05
495	DLNAACK	7	iodo TMT-6plex var	_DLNAAC(io)K_	GSBRNA2T00139134001	heat shock protein 83-like [Brassica napus]	2	532.292	0.14068	0.0082513	98.997	2		6343.2	7171.4		675.42	1061.6		8990	8448.4		1174.6	1548.1
496	DLSLCHSMIPLGSCTMK	17	Oxidation (M),2 iodo TMT-6plex var	_DLSLC(io)HSMIPLGSC(io)TM(ox)K_	GSBRNA2T00121192001	---	3	837.438	0.43149	0.0054418	42.947	1	3200.7	2470.3	2919.6	305.25	289.44	268.57	2515.4	2089.6	2173.8	282.04	404.6	148.08
503	DLSSMLTSAVSNPEAACCNIFNCVSDR	27	3 iodo TMT-6plex var	_DLSSMLTSAVSNPEAAC(io)C(io)NIFNC(io)VSDR_	GSBRNA2T00156755001	chloroplast stem-loop binding protein of 41 kDa a, chloroplastic [Brassica oleracea var. oleracea]	3	1278.98	-0.63633	7.6523e-12	85.376	2	4969.6	7315.4	8394.9	366.19	335.43	482.25	4234.9	7681.6	7876.6	0	0	0
510	DNFWEMGDTGPCGPCTEIHYDR	22	2 iodo TMT-6plex var	_DNFWEMGDTGPC(io)GPC(io)TEIHYDR_	GSBRNA2T00083616001	alanine--tRNA ligase [Raphanus sativus]	4	801.12	0.42566	7.0778e-05	60.347	1	3270.2			460.45			4350.6			488.33
513	DNPETDECR	9	iodo TMT-6plex var	_DNPETDEC(io)R_	GSBRNA2T00049485001	calvin cycle protein CP12-2, chloroplastic [Brassica rapa]	2	704.322	0.49648	0.00041428	115.82	1	8037.8	7956.4	6578.8	1190.7	893.81	1058.9	5423.9	5724.3	5056.7	1436.5	1407.5	1259.8
519	DNTFVYMCGLK	11	Oxidation (M),iodo TMT-6plex var	_DNTFVYM(ox)C(io)GLK_	GSBRNA2T00005645001	ferredoxin--NADP reductase, leaf isozyme 1, chloroplastic-like [Brassica napus]	3	545.941	0.092172	0.011622	55.718	1	2206.4	1345	1899.3	873.78	578.03	606.8	1830.5	1428.3	1734.1	1220.6	854.16	1001.9
361	DPTQQTAIDNFMVHELDGTQNEWGWCK	27	iodo TMT-6plex var	_DPTQQTAIDNFMVHELDGTQNEWGWC(io)K_	GSBRNA2T00141806001	bifunctional enolase 2/transcriptional activator-like isoform X2 [Brassica napus]	4	873.909	-0.11368	1.558e-17	115.5	1	1265.9	1225.3	969.16	0	0	0	1754.4	1922.4	1413.6	404.71	379.03	318.94
363	DQDAIDCCNK	10	2 iodo TMT-6plex var	_DQDAIDC(io)C(io)NK_	GSBRNA2T00050271001	bifunctional purine biosynthesis protein PurH-like isoform X1 [Brassica napus]	3	594.967	-0.53446	0.0047794	63.212	1	5002.4		3094.1	766.79		271.88	6040.1		3722.6	986.01		450.02
532	DQGGCGSCWTFSTTGALEAAYHQAFGK	27	2 iodo TMT-6plex var	_DQGGC(io)GSC(io)WTFSTTGALEAAYHQAFGK_	GSBRNA2T00133095001	thiol protease aleurain [Brassica oleracea var. oleracea]	4	863.67	0.12088	4.199e-36	161.68	1	3290.8	2776.4		0	0		1785.2	1615.3		0	0
367	DQGSCGSCWAFSTIGAVEGINK	22	2 iodo TMT-6plex var	_DQGSC(io)GSC(io)WAFSTIGAVEGINK_	GSBRNA2T00122973001	cysteine proteinase RD21A [Brassica rapa]	3	963.486	-0.97541	3.2818e-11	102.07	1	14030	8839.6	4905.6	548.26	308.08	0	6998.6	5227	2708.1	340.57	530.86	0
544	DSDPLEEYCKDNPETSECR	19	2 iodo TMT-6plex var	_DSDPLEEYC(io)KDNPETSEC(io)R_	GSBRNA2T00099095001	calvin cycle protein CP12-2, chloroplastic-like [Brassica rapa]	4	722.842	0.23899	4.0483e-13	116.06	1	3257.2	2288.8	2168.3	104.75	129.11	287.05	2105.8	1656.7	1594.4	365.76	247.33	306.07
541	DSIMDSTVNCR	11	iodo TMT-6plex var	_DSIMDSTVNC(io)R_	GSBRNA2T00057379001	aminomethyltransferase, mitochondrial-like [Brassica napus]	2	785.382	0.67146	5.9085e-09	155.11	3	11439	16301		2669.6	2860.4		8918.2	11868		2226.8	2911.7
548	DSIQPALGNASVVICCIGASEK	22	2 iodo TMT-6plex var	_DSIQPALGNASVVIC(io)C(io)IGASEK_	GSBRNA2T00107570001	---	3	945.182	-0.40496	0.00057795	51.31	1	1986.9			285.57			1997.2			0
551	DSLAALMVTYPSTHGVYEETIDEICK	26	iodo TMT-6plex var	_DSLAALMVTYPSTHGVYEETIDEIC(io)K_	GSBRNA2T00121192001	---	4	804.402	0.17552	3.9458e-22	129.9	1	1422.8	1418.2	1709	0	294.18	329.91	1090.3	1335.2	1216	358.97	398.11	270.3
557	DSYGAPLCPCR	11	2 iodo TMT-6plex var	_DSYGAPLC(io)PC(io)R_	GSBRNA2T00080533001	ferredoxin-thioredoxin reductase catalytic chain, chloroplastic [Brassica napus]	3	613.992	-0.18142	6.3809e-05	97.472	1	8816.5	13005	12078	666.59	920.88	686.72	7706.9	10603	9610.6	655.03	688.36	397.2
556	DTHGYVGADLAALCTEAALQCIR	23	2 iodo TMT-6plex var	_DTHGYVGADLAALC(io)TEAALQC(io)IR_	GSBRNA2T00073226001	cell division control protein 48 homolog A [Brassica oleracea var. oleracea]	3	1017.2	-0.010562	7.2776e-31	158.52	1	6638.4	3320.3		455.99	346.06		9218.2	4727.6		639.02	396.26
564	DTLGQEINVTCEVQQLLGNNR	21	iodo TMT-6plex var	_DTLGQEINVTC(io)EVQQLLGNNR_	GSBRNA2T00108800001	ATP synthase subunit beta, chloroplastic [Brassica napus]	3	891.799	0.34242	1.4235e-35	173.21	2	6327.6	7030.6	7644.2	345.29	0	254.93	4437.6	5176.6	5804.1	488.35	327.91	0
563	DVCLLAR	7	iodo TMT-6plex var	_DVC(io)LLAR_	GSBRNA2T00016792001	phosphoenolpyruvate carboxylase 2 [Brassica rapa]	3	373.557	-0.29661	0.030541	49.358	1		7912.5			1034.1			9878.8			1907.9
578	DVSDFLECK	9	iodo TMT-6plex var	_DVSDFLEC(io)K_	GSBRNA2T00069645001	probable sucrose-phosphatase 2 [Brassica napus]	2	692.853	0.59438	0.00039764	120.99	1	3059.6			510.07			3041.4			926.03
580	DYADLCFK	8	iodo TMT-6plex var	_DYADLC(io)FK_	GSBRNA2T00058697001	myrosinase-like isoform X1 [Brassica napus]	2	652.331	0.17339	0.0019727	109.48	1	7356.7	10284	9616.6	1047.8	1618.4	706.92	4739.7	7358.9	7296.9	900.04	1414.4	872.75
582	DYCGQLGVDPGPNLSC	16	2 iodo TMT-6plex var	_DYC(io)GQLGVDPGPNLSC(io)_	GSBRNA2T00050295001	endochitinase At2g43590 [Brassica rapa]	3	766.054	0.57288	2.8236e-14	135.47	1	4067.1	5534.1		274.09	95.456		1508.1	2010.7		300.92	208.09
583	DYIFPCLR	8	iodo TMT-6plex var	_DYIFPC(io)LR_	GSBRNA2T00000932001	---	2	678.371	0.3231	0.0057138	89.55	2	3061.5	3423.1		845.81	1273.9		2592.6	2994.4		907.7	1625.4
589	EACSTAEVYK	10	iodo TMT-6plex var	_EAC(io)STAEVYK_	GSBRNA2T00148362001	4-diphosphocytidyl-2-C-methyl-D-erythritol kinase, chloroplastic [Brassica oleracea var. oleracea]	2	715.363	0.23174	0.0042305	74.165	1	3470.4	3299.4		464.8	337.33		3241.8	2821		630.67	813.83
597	EAFVEMCGDEYVQK	14	iodo TMT-6plex var	_EAFVEMC(io)GDEYVQK_	GSBRNA2T00050963001	geranylgeranyl diphosphate reductase, chloroplastic [Brassica napus]	3	659.648	0.081708	0.0061397	53.377	1	1458.9	905.9		568.86	230.95		1484.8	804.47		538.13	395.88
587	EAGCDTPTSPSCGACLGGPADTYAR	25	3 iodo TMT-6plex var	_EAGC(io)DTPTSPSC(io)GAC(io)LGGPADTYAR_	GSBRNA2T00077191001	3-isopropylmalate dehydratase large subunit-like [Brassica napus]	5	678.34	-0.026512	1.665e-05	57.051	1	6503.2	5298.7	7084.8	438.59	453.82	389.81	7670.7	6226	5890.3	0	253.58	591.87
599	EAILVNCSR	9	iodo TMT-6plex var	_EAILVNC(io)SR_	GSBRNA2T00124391001	---	2	667.377	0.17487	0.00047787	112.71	1	7841.3	8760.6		551.42	1085.5		6248.8	6739.6		797.25	1604.8
592	EASSCDLK	8	iodo TMT-6plex var	_EASSC(io)DLK_	GSBRNA2T00100024001	---	2	591.305	0.74985	0.01114	80.455	1	1497	3138.5	1635.1	468.2	442.25	324.58	2376.1	4526.6	2002.5	464.61	944.23	462.69
607	ECADLWPR	8	iodo TMT-6plex var	_EC(io)ADLWPR_	GSBRNA2T00153739001	60S ribosomal protein L23 [Brassica napus]	3	440.231	-0.6914	0.0018178	101.54	3	3652.7	4253.7	2383.9	1418	801.16	878.55	4975.1	6574.7	4266.9	1820.2	1251.7	1378
610	ECELIHGR	8	iodo TMT-6plex var	_EC(io)ELIHGR_	GSBRNA2T00080643001	chlorophyll a-b binding protein CP29.2, chloroplastic [Brassica rapa]	2	643.348	0.33092	2.9831e-05	163.99	1	14924	16596	14524	1741.1	1613.4	1225.3	11939	12794	11318	2505.6	2198.6	1861.2
612	ECGEVVGAR	9	iodo TMT-6plex var	_EC(io)GEVVGAR_	GSBRNA2T00081583001	28 kDa ribonucleoprotein, chloroplastic [Brassica rapa]	2	624.832	0.21551	0.039256	52.549	1	3554.2			986.73			6162.7			1459.2
417	ECGITHPLR	9	iodo TMT-6plex var	_EC(io)GITHPLR_	GSBRNA2T00084729001	---	3	452.254	-0.56945	0.0021733	83.948	1		3793.6	2607.6		1672.6	964.14		4671.2	2297.3		2158.2	1254.3
419	ECLPLVLIIR	10	iodo TMT-6plex var	_EC(io)LPLVLIIR_	GSBRNA2T00136102001	40S ribosomal protein S4-1-like [Brassica napus]	2	749.473	0.82108	0.011142	70.028	1	1948.4	2337.3	2274.7	390.06	378.85	247.69	2790.2	3200.7	3198.1	520.88	702.03	670.62
618	ECQVNLADCEAQLTSLQNK	19	2 iodo TMT-6plex var	_EC(io)QVNLADC(io)EAQLTSLQNK_	GSBRNA2T00085322001	K(+) efflux antiporter 1, chloroplastic-like isoform X2 [Brassica oleracea var. oleracea]	4	692.114	0.14291	0.00069611	53.453	1	1648.4			0			1416.4			229.31
619	EDGVIMNDETVHQLCK	16	iodo TMT-6plex var	_EDGVIMNDETVHQLC(io)K_	GSBRNA2T00112872001	delta-aminolevulinic acid dehydratase 1, chloroplastic-like [Brassica napus]	3	720.692	0.13387	5.3596e-08	99.927	1	1556.8	1351.8	1696.1	855.89	940.87	2059.2	2393.3	1780.2	2527.1	1112.5	794.47	2380.8
609	EDLIAYLASGCK	12	iodo TMT-6plex var	_EDLIAYLASGC(io)K_	GSBRNA2T00072672001	glutamate--cysteine ligase, chloroplastic [Brassica napus]	2	806.434	0.54464	2.082e-06	107.97	1		2747.2			0			2605			251.73
618	EETGAGMMDCK	11	iodo TMT-6plex var	_EETGAGMMDC(io)K_	GSBRNA2T00123111001	altered inheritance of mitochondria protein 21 [Brassica rapa]	2	750.838	-0.19573	9.167e-07	130.1	1	4082.2	4107.4	3816.7	1398	1345.7	941.25	4448	4230.9	3476.2	1942.4	1497.4	1542
634	EFGCDAK	7	iodo TMT-6plex var	_EFGC(io)DAK_	GSBRNA2T00015288001	probable ribose-5-phosphate isomerase 3, chloroplastic [Brassica rapa]	2	549.776	0.073471	0.0043215	104.37	1	9433.4	5954.8		1359.5	728.78		8038.5	5243.4		1350.8	1044.1
624	EFVQECYEVAADYDGNR	17	iodo TMT-6plex var	_EFVQEC(io)YEVAADYDGNR_	GSBRNA2T00016792001	phosphoenolpyruvate carboxylase 2 [Brassica rapa]	3	779.693	0.48143	0.00074501	58.712	1	1851.2	1605.5		441.88	215.09		1964.1	1531.6		508.48	287.18
637	EGDHVIIGQCR	11	iodo TMT-6plex var	_EGDHVIIGQC(io)R_	GSBRNA2T00146079001	40S ribosomal protein S11-3-like [Brassica napus]	2	778.414	0.43737	1.2942e-07	150.61	1	3036.4	2563.7		234.83	138.55		4874.1	3620.9		672.54	392.22
631	EGPLCDENMR	10	iodo TMT-6plex var	_EGPLC(io)DENMR_	GSBRNA2T00069636001	elongation factor 2 [Brassica napus]	3	498.241	-0.082727	0.0062084	64.103	1	8624.8	4957.2		2347.8	1335.5		9196.2	6527.8		3270.1	2618.3
463	EIDYSCGDVCGVLVQYPGTEGEVLDYGEFVK	31	2 iodo TMT-6plex var	_EIDYSC(io)GDVC(io)GVLVQYPGTEGEVLDYGEFVK_	GSBRNA2T00130674001	glycine dehydrogenase (decarboxylating) 1, mitochondrial [Brassica rapa]	4	1011.25	0.18676	4.9128e-15	103.27	1	18241	7625.2	3430.3	856.9	230.26	0	12609	5941.8	1957.8	0	0	0
670	EIFSPFGTVTSCK	13	iodo TMT-6plex var	_EIFSPFGTVTSC(io)K_	GSBRNA2T00037528001	polyadenylate-binding protein 2-like [Brassica napus]	3	582.31	0.22404	0.00059866	73.927	1	942.85	1203.3		301.11	390.61		1412.9	1629.2		449.65	408.33
671	EIGESEFTSTVLESDRPVLVNFVATWCGPCK	31	2 iodo TMT-6plex var	_EIGESEFTSTVLESDRPVLVNFVATWC(io)GPC(io)K_	GSBRNA2T00074957001	thioredoxin X, chloroplastic-like [Brassica napus]	5	815.224	1.2172	4.0011e-07	56.366	1	2790.2			0			1952.1			0
672	EIGFISDDVGLDADNCK	17	iodo TMT-6plex var	_EIGFISDDVGLDADNC(io)K_	GSBRNA2T00137491001	S-adenosylmethionine synthase 2 [Brassica napus]	3	714.019	-0.19085	6.475e-21	164.41	1	2839.4	2151.1	1962.4	435.38	0	250.41	2892.6	2140.4	1887.2	470.42	315.32	293.89
665	EILGTCVSVGCTVDGK	16	2 iodo TMT-6plex var	_EILGTC(io)VSVGC(io)TVDGK_	GSBRNA2T00129484001	60S ribosomal protein L12-2-like [Brassica rapa]	3	747.078	0.40266	1.1602e-10	118.26	1	4508.1	3693.3	3841	448.25	0	616.1	5198.6	5071.1	6222.5	0	0	0
681	EIRPVCK	7	iodo TMT-6plex var	_EIRPVC(io)K_	GSBRNA2T00022681001	DEAD-box ATP-dependent RNA helicase 56-like [Brassica napus]	3	391.904	-0.73671	0.0023954	108.09	1	12150	8533.2		2694.3	3716.9		13128	9515.1		4364.1	4294.3
686	EKAPAAFCR	9	iodo TMT-6plex var	_EKAPAAFC(io)R_	GSBRNA2T00144298001	GDP-mannose 3,5-epimerase-like [Brassica napus]	3	441.246	-0.011066	0.0088899	67.897	1		7503.6			1541.2			8471.6			2158.9
698	ELAAAEFDGYCEGELVK	17	iodo TMT-6plex var	_ELAAAEFDGYC(io)EGELVK_	GSBRNA2T00127351001	nucleoid-associated protein PCC8801_2554-like [Brassica napus]	3	725.028	0.19764	0.00049828	62.813	1	1739.3			362.52			1723.6			553.39
705	ELAYQICNEFVR	12	iodo TMT-6plex var	_ELAYQIC(io)NEFVR_	GSBRNA2T00022681001	DEAD-box ATP-dependent RNA helicase 56-like [Brassica napus]	3	605.32	0.29337	0.0058734	57.175	1	2030.1			400.32			1842.7			590.09
494	ELESICNPIIAK	12	iodo TMT-6plex var	_ELESIC(io)NPIIAK_	GSBRNA2T00069553001	probable mediator of RNA polymerase II transcription subunit 37e [Raphanus sativus]	2	829.971	-0.54105	2.7571e-09	174.77	1	1677.5	2458.5	1382.6	625.66	501.69	616.93	1847.7	3489.3	1671	923.71	638.17	742.25
715	ELEVIHCR	8	iodo TMT-6plex var	_ELEVIHC(io)R_	GSBRNA2T00141918001	chlorophyll a-b binding protein 1, chloroplastic [Brassica napus]	2	664.371	0.15022	2.563e-13	198.07	3	29350	22116	23881	1772.4	1309.4	1875.4	23428	18689	19395	2095.4	1688.6	1823.8
721	ELGVPIVMHDYLTGGFTANTSLAHYCR	27	Oxidation (M),iodo TMT-6plex var	_ELGVPIVM(ox)HDYLTGGFTANTSLAHYC(io)R_	GSBRNA2T00154096001	ribulose 1,5-bisphosphate carboxylase/oxygenase large subunit (chloroplast) [Brassica juncea]	4	828.419	-0.062731	1.2178e-54	199.75	2	3453.6	4341	3363.9	123.06	104.42	341.01	2923.9	3448.2	2938.8	403.49	714.74	326.88
729	ELNCVNR	7	iodo TMT-6plex var	_ELNC(io)VNR_	GSBRNA2T00153406001	ribosomal protein S3 (chloroplast) [Brassica juncea]	3	392.883	-0.43455	0.012468	67.035	1	11450			2535.2			11295			4343.8
729	ELVSCSNCTDYQAR	14	2 iodo TMT-6plex var	_ELVSC(io)SNC(io)TDYQAR_	GSBRNA2T00144212001	serine--tRNA ligase, cytoplasmic-like isoform X2 [Brassica rapa]	3	749.714	0.095949	0.00032158	74.475	1		5717.3			314.55			7485.3			392.26
735	EMDDYVGCMYYYTNEFDLCR	20	2 iodo TMT-6plex var	_EMDDYVGC(io)MYYYTNEFDLC(io)R_	GSBRNA2T00154375001	NADH dehydrogenase [ubiquinone] 1 alpha subcomplex subunit 8-B [Brassica napus]	4	797.861	0.050016	8.9171e-06	74.029	1	3954.1	4847.4	2152.8	0	277.34	0	3647.3	3748.5	1830.2	0	0	131.43
732	EMVQACLLPGATR	13	iodo TMT-6plex var	_EMVQAC(io)LLPGATR_	GSBRNA2T00108809001	PSI P700 apoprotein A2 (chloroplast) [Aethionema grandiflorum]	3	573.315	0.16531	5.0674e-05	90.412	1	3054.5	1931.6	1704.2	621.72	404.63	189.74	3821.9	2844.8	2006.9	495.94	524.04	358.83
739	ENAPCIVFVDEIDAVGR	17	iodo TMT-6plex var	_ENAPC(io)IVFVDEIDAVGR_	GSBRNA2T00048583001	ATP-dependent zinc metalloprotease FTSH 2, chloroplastic [Brassica napus]	3	726.047	0.35364	6.7118e-05	73.788	1	866.35	1268.2	1011.4	0	187.93	0	838.12	1096.9	977.12	240.16	0	0
740	ENEPFTCGNTDQLSSK	16	iodo TMT-6plex var	_ENEPFTC(io)GNTDQLSSK_	GSBRNA2T00010581001	myrosinase-like [Brassica rapa]	3	700.335	-0.53357	1.0793e-10	116.99	1	3809.9	3963	2075.6	195.56	514.09	567.47	2841.3	2792.6	1362.7	393.5	427.84	691.22
742	ENILEACR	8	iodo TMT-6plex var	_ENILEAC(io)R_	GSBRNA2T00130747001	LL-diaminopimelate aminotransferase, chloroplastic isoform X1 [Brassica oleracea var. oleracea]	2	638.848	0.21312	0.005862	88.921	1	6908.2			711.22			6243.9			838.07
738	ENPGCLFIATNR	12	iodo TMT-6plex var	_ENPGC(io)LFIATNR_	GSBRNA2T00114576001	phosphoglycolate phosphatase 1B, chloroplastic [Brassica napus]	2	832.443	0.6108	0.024402	51.726	1		4107.1			493.33			3215.1			597.86
739	ENYGCEVVCFTADVGQGIK	19	2 iodo TMT-6plex var	_ENYGC(io)EVVC(io)FTADVGQGIK_	GSBRNA2T00116060001	argininosuccinate synthase, chloroplastic [Brassica napus]	4	673.348	0.53002	0.00023383	56.081	1		1858.9			0			1630.2			243.86
743	EQCLALGTR	9	iodo TMT-6plex var	_EQC(io)LALGTR_	GSBRNA2T00018242001	photosystem I reaction center subunit II-1, chloroplastic [Brassica oleracea var. oleracea]	2	660.369	0.4169	0.00030119	119.34	2	17159	16106	10248	2349.2	1838.2	892.22	11192	11223	6912.4	2732.8	1724.5	1416.5
747	EQGLEILAFPCNQFLGQEPGNNEEIQQTVCTR	32	2 iodo TMT-6plex var	_EQGLEILAFPC(io)NQFLGQEPGNNEEIQQTVC(io)TR_	GSBRNA2T00048665001	probable glutathione peroxidase 2 [Brassica napus]	4	1066.79	-0.41834	1.2426e-18	101.74	1		2143.8			0			2144.9			0
755	ERPYGHCLVAGLK	13	iodo TMT-6plex var	_ERPYGHC(io)LVAGLK_	GSBRNA2T00154797001	60S ribosomal protein L27-3-like [Raphanus sativus]	4	443.751	-0.77117	0.021594	44.132	1	1724.5			2846			1750			2886.3
755	ESCADDPVSGECVAAWDEVEELSAAASHAR	30	2 iodo TMT-6plex var	_ESC(io)ADDPVSGEC(io)VAAWDEVEELSAAASHAR_	GSBRNA2T00049485001	calvin cycle protein CP12-2, chloroplastic [Brassica rapa]	5	753.361	-0.16726	3.1857e-10	81.346	2	2945.2	3624.8	1915.1	0	0	0	1820.5	1822.2	1415.5	273.39	0	0
760	ESDYPYTGHDNSGCK	15	iodo TMT-6plex var	_ESDYPYTGHDNSGC(io)K_	GSBRNA2T00056529001	cysteine proteinase 15A-like [Brassica napus]	3	667.965	0.65593	0.0025844	55.755	1		1740			672.1			2039.9			821.7
760	ESELIHCR	8	iodo TMT-6plex var	_ESELIHC(io)R_	GSBRNA2T00129620001	chlorophyll a-b binding protein 6, chloroplastic isoform X1 [Brassica rapa]	2	658.353	0.20393	0.0010052	138.54	1	15903	9671.4	16125	1587.4	819.93	2218.6	12579	7371.3	12756	1613.2	901.37	2467.9
775	ETCADDPVSGECVAAWDEVEELSAAASHAR	30	2 iodo TMT-6plex var	_ETC(io)ADDPVSGEC(io)VAAWDEVEELSAAASHAR_	GSBRNA2T00133000001	calvin cycle protein CP12-1, chloroplastic-like [Brassica napus]	4	944.953	-0.10775	1.1103e-77	237.38	1	3635	5230.6	2691.8	0	0	0	2631.3	3964.7	1890.1	0	0	0
541	ETCFLLEGK	9	iodo TMT-6plex var	_ETC(io)FLLEGK_	GSBRNA2T00151445001	RmlC-like cupins superfamily protein [Arabidopsis thaliana]	3	456.918	-1.1878	0.013872	58.699	1	10149	2900	2531.4	5071.9	748.8	1069.6	8064.9	3001.7	2830.9	4941.2	940.28	972
777	ETPAIDVCK	9	iodo TMT-6plex var	_ETPAIDVC(io)K_	GSBRNA2T00135520001	UDP-glucose 6-dehydrogenase 3-like [Brassica napus]	2	652.858	0.45586	0.02781	59.067	1		2757.2			1063.7			2949.8			1398
787	EVCAASR	7	iodo TMT-6plex var	_EVC(io)AASR_	GSBRNA2T00146580001	tetratricopeptide repeat protein SKI3 isoform X1 [Brassica napus]	2	532.79	0.1406	0.039887	58.782	1	4828.3			895.45			4089.3			1193.2
784	EVCFACVDAEEFR	13	2 iodo TMT-6plex var	_EVC(io)FAC(io)VDAEEFR_	GSBRNA2T00000331001	---	3	726.036	1.0818	4.3347e-05	89.189	1	4058.7	4762.5	2288.4	295.76	166.78	0	3936.9	4746.9	2057.3	614.51	499.51	286.17
788	EVECDGDTYVLDAAEESGLDLPYSCR	26	2 iodo TMT-6plex var	_EVEC(io)DGDTYVLDAAEESGLDLPYSC(io)R_	GSBRNA2T00105272001	ferredoxin-1, chloroplastic-like [Brassica napus]	4	877.672	-0.01362	4.1986e-19	121.39	1		1930.7	1905.9		0	0		1871.1	1627.1		94.687	0
794	EVQEAKSMLAKEFCDR	16	iodo TMT-6plex var	_EVQEAKSMLAKEFC(io)DR_	GSBRNA2T00060725001	U-box domain-containing protein 34-like [Brassica napus]	3	738.38	0.30178	0.0017965	60.55	1	0	0	266.84	4093.6	5219.4	7491.9	0	0	0	3870.5	4577.3	6764.3
800	EWLCWMR	7	iodo TMT-6plex var	_EWLC(io)WMR_	GSBRNA2T00049793001	alpha-amylase 3, chloroplastic [Brassica oleracea var. oleracea]	3	451.565	-0.030704	0.0087085	71.949	1	7470.6	9616.2		2819.1	3325.4		7070.3	8414		3248.5	3414.2
805	FADACLR	7	iodo TMT-6plex var	_FADAC(io)LR_	GSBRNA2T00143566001	malate dehydrogenase 2, glyoxysomal [Brassica oleracea var. oleracea]	2	562.808	0.20149	0.022015	66.993	1	6613.3	4745.1	22194	837.39	503.98	3565	4815.3	3614.4	17861	1084	941.6	4178.5
566	FAESCMYSPVYR	12	iodo TMT-6plex var	_FAESC(io)MYSPVYR_	GSBRNA2T00152011001	NADP-dependent malic enzyme 2-like [Brassica napus]	3	594.623	-0.3501	3.1943e-06	124.6	1	7076.4	2535.4	3762.5	1323.5	999.79	1011.8	5717.3	2047.9	3859.5	1460.8	1126.4	1122.9
576	FATSYGASAAVCELPFSTISSDTAGGVGGTCVLR	34	2 iodo TMT-6plex var	_FATSYGASAAVC(io)ELPFSTISSDTAGGVGGTC(io)VLR_	GSBRNA2T00108967001	glutathione reductase, chloroplastic [Brassica napus]	4	989.259	0.01314	5.4798e-16	101.2	1	1143.7	2696.3	1600.9	0	0	0	1020.5	3013.9	1497.2	0	0	0
824	FCDFIER	7	iodo TMT-6plex var	_FC(io)DFIER_	GSBRNA2T00075890001	UDP-glycosyltransferase 79B6 [Brassica rapa]	3	420.22	-0.79884	0.039622	43.448	1		3913.3			1857.3			4275.7			1997.1
577	FCDTLISIR	9	iodo TMT-6plex var	_FC(io)DTLISIR_	GSBRNA2T00130674001	glycine dehydrogenase (decarboxylating) 1, mitochondrial [Brassica rapa]	2	698.895	-0.5297	0.0013691	137.05	1	13207	28731	9840.6	672.77	1865.9	578.4	11013	24561	7417.8	1092.6	2452.6	572.34
579	FCDYTNDQSNLK	12	iodo TMT-6plex var	_FC(io)DYTNDQSNLK_	GSBRNA2T00079010001	thylakoid lumenal 17.4 kDa protein, chloroplastic isoform X2 [Brassica napus]	2	888.925	-0.98512	1.9849e-09	177.1	1	2778.6	4116	2807.3	1820	1783.1	593.59	2708.7	3190.5	2452.1	1921.7	2074.7	513.32
829	FCEEEDAAH	9	iodo TMT-6plex var	_FC(io)EEEDAAH_	GSBRNA2T00016543001	glycine cleavage system H protein 3, mitochondrial-like [Raphanus sativus]	3	460.541	-0.093707	8.9287e-07	161.11	1	14616	12562	12039	2028.7	1844.8	1153.1	11247	10480	9897	2545	2209.7	1439.5
582	FCFEPTSFTVK	11	iodo TMT-6plex var	_FC(io)FEPTSFTVK_	GSBRNA2T00081678001	---	2	817.926	0.23029	5.0154e-05	121.41	2	9507.7	11840	10157	507.3	662.98	216.28	6891	8165.1	7880.2	270.45	397.48	642.75
584	FCHPILVR	8	iodo TMT-6plex var	_FC(io)HPILVR_	GSBRNA2T00118970001	L-ascorbate peroxidase S, chloroplastic/mitochondrial-like isoform X1 [Brassica napus]	3	438.595	-1.5316	0.005138	81.784	1			5438.3			1718.2			5645.9			1797.8
832	FCNWITSTENR	11	iodo TMT-6plex var	_FC(io)NWITSTENR_	GSBRNA2T00124689001	PsbA (chloroplast) [Senna tora]	2	850.425	0.26173	1.7e-09	163.51	1	14613	12519	24398	1239.9	1269.5	1832.3	8852.6	8141.1	15324	1997.9	1223.7	2515.7
835	FCPYCYK	7	2 iodo TMT-6plex var	_FC(io)PYC(io)YK_	GSBRNA2T00055111001	ribosomal protein L33 (chloroplast) [Camelina sativa]	3	527.949	0.37373	0.0090826	67.035	1	10627	3065.5	6792.6	1629.6	1247	804.32	13561	3345.4	9236.2	1486.2	1441.1	1099.2
587	FCTGGMSLGAISR	13	iodo TMT-6plex var	_FC(io)TGGMSLGAISR_	GSBRNA2T00136396001	ferredoxin-dependent glutamate synthase 1, chloroplastic/mitochondrial [Brassica napus]	3	543.62	-0.83361	6.8515e-09	149.96	1	1820.4	2939.7	3175.1	660.21	895.9	613.93	1638.2	2089.6	2477.4	922.72	1017.5	829.55
832	FDLSFCGSLLQK	12	iodo TMT-6plex var	_FDLSFC(io)GSLLQK_	GSBRNA2T00068136001	haloacid dehalogenase-like hydrolase domain-containing protein At3g48420 [Brassica napus]	3	562.974	-0.36814	1.2622e-05	105.65	1	2176.9	1767.2		192.11	265.97		1729.1	1235.5		304.29	264.44
835	FDNLYGCR	8	iodo TMT-6plex var	_FDNLYGC(io)R_	GSBRNA2T00087145001	---	3	439.559	-0.75842	0.0024485	95.531	1	17338	19611	20806	2320.7	2247.5	2547.7	29389	33435	31651	2482.5	2656	3858.2
837	FDSGCGWPAFFDGLPGAINR	20	iodo TMT-6plex var	_FDSGC(io)GWPAFFDGLPGAINR_	GSBRNA2T00131642001	peptide methionine sulfoxide reductase B5-like isoform X1 [Brassica napus]	3	819.405	0.36963	0.00025023	56.719	1	1234.1	1476.2		355.81	472.56		1086.1	1190.6		412.36	377.78
844	FDVVFDAIGMCDK	13	iodo TMT-6plex var	_FDVVFDAIGMC(io)DK_	GSBRNA2T00087850001	quinone oxidoreductase-like protein At1g23740, chloroplastic [Brassica napus]	3	596.967	0.20853	0.00090146	69.92	2	2932.8	1422.7		1559.5	525.46		2343.8	1286.5		1680.9	877.08
844	FDWLCQLYKPK	11	iodo TMT-6plex var	_FDWLC(io)QLYKPK_	GSBRNA2T00128504001	obg-like ATPase 1 [Brassica napus]	4	443.246	-0.16951	0.032161	42.243	1	3323.5			483.34			3859.7			568.86
599	FEELCSDLLDR	11	iodo TMT-6plex var	_FEELC(io)SDLLDR_	GSBRNA2T00048956001	heat shock 70 kDa protein 6, chloroplastic-like [Brassica rapa]	2	834.927	-0.4828	0.0010156	90.697	1	4909.7	5572.2	8042.1	107.65	556.65	741.81	3754.3	3972.4	5728.2	668.92	789.96	692.37
856	FELLGTCK	8	iodo TMT-6plex var	_FELLGTC(io)K_	GSBRNA2T00142569001	probable plastid-lipid-associated protein 6, chloroplastic [Brassica napus]	2	620.352	0.020896	0.01518	74.464	1		2755.2	3892.3		656.14	917.55		2174.7	3570.4		1050.5	1164.7
853	FEPCGLNQLYAMR	13	iodo TMT-6plex var	_FEPC(io)GLNQLYAMR_	GSBRNA2T00147519001	starch synthase 1, chloroplastic/amyloplastic [Brassica napus]	3	624.322	0.17927	0.0030174	62.338	1	2573.9			593.99			3025.1			1192.8
856	FESVLGSKPTPDEASVASYNVACCYSK	27	2 iodo TMT-6plex var	_FESVLGSKPTPDEASVASYNVAC(io)C(io)YSK_	GSBRNA2T00125570001	binding protein [Arabidopsis lyrata subsp. lyrata]	4	878.447	0.061105	2.2205e-10	84.529	1	2940.8	1738.6	2784.7	299.34	299.96	0	2774.6	1548	2472.3	442.77	378.57	0
876	FFGDDYYICR	10	iodo TMT-6plex var	_FFGDDYYIC(io)R_	GSBRNA2T00031395001	bifunctional epoxide hydrolase 2-like [Brassica napus]	2	814.392	0.41196	0.011827	64.711	1	5279.8	4916.9		360.99	302.63		3666.5	4018.1		992.18	672.66
880	FFGNLMDAGMCSVCGEESFGTGSDHIR	27	2 iodo TMT-6plex var	_FFGNLMDAGMC(io)SVC(io)GEESFGTGSDHIR_	GSBRNA2T00119392001	probable phosphoglucomutase, cytoplasmic 1 [Brassica napus]	4	882.166	0.15711	3.6211e-12	91.767	1	3458.9	4072.1		312.41	291.04		3795.5	4615.5		664.35	565.54
616	FFPTLCR	7	iodo TMT-6plex var	_FFPTLC(io)R_	GSBRNA2T00045117001	defensin-like protein 197 [Brassica napus]	3	404.897	-1.1396	0.006761	81.297	1	6201.1	6537	15938	446.01	668.18	804.97	4956.9	5525.7	12310	565.63	492.82	753.46
889	FFYASSACIYPEFK	14	iodo TMT-6plex var	_FFYASSAC(io)IYPEFK_	GSBRNA2T00144298001	GDP-mannose 3,5-epimerase-like [Brassica napus]	3	668.004	0.51948	0.00051419	72.88	1	5479.4	1828.5	3306.9	682.73	520.09	386.33	6206.1	2245.3	3510.4	1308.7	737.91	531.44
622	FGEVAGASSVVVLPVCK	17	iodo TMT-6plex var	_FGEVAGASSVVVLPVC(io)K_	GSBRNA2T00015308001	rubisco accumulation factor 2, chloroplastic [Brassica rapa]	3	664.378	-0.087432	0.0078193	44.252	1			1117.5			264.74			1742			119.05
894	FGNFSIEAECPK	12	iodo TMT-6plex var	_FGNFSIEAEC(io)PK_	GSBRNA2T00131896001	glutathione S-transferase U19 [Brassica napus]	3	557.619	0.05074	0.00072816	77.124	1	1498.8	1798.6	1458.7	400.9	508.35	346.54	1737.9	2002.9	1407.1	405.92	722.64	429.23
915	FHWKPTCGIK	10	iodo TMT-6plex var	_FHWKPTC(io)GIK_	GSBRNA2T00102833001	catalase-3 [Brassica napus]	3	515.957	-0.1125	0.00039083	96.342	1	3848.2	5157	5164.2	503.71	946.52	593.22	3052.6	4402.6	4716.4	614.3	1441	951.24
645	FHWKPTCGVK	10	iodo TMT-6plex var	_FHWKPTC(io)GVK_	GSBRNA2T00071509001	catalase-2 [Brassica rapa]	3	511.285	-0.72163	0.004932	73.499	1	4637.6	4011.2	3827.8	622.5	754.86	505.19	4305.6	3803.3	3516.4	1098.8	828.87	850.02
648	FIDVSACR	8	iodo TMT-6plex var	_FIDVSAC(io)R_	GSBRNA2T00089769001	protein JASON [Brassica napus]	2	620.339	-0.70748	0.003349	114.78	1	303.82	570.07	633.82	325.91	231.17	110.81	587.59	366	571.95	287.11	228.87	124.75
652	FITPEGEQEVECDDDVYVLDAAEEAGIDLPYSCR	34	2 iodo TMT-6plex var	_FITPEGEQEVEC(io)DDDVYVLDAAEEAGIDLPYSC(io)R_	GSBRNA2T00117151001	ferredoxin, leaf L-A-like [Brassica napus]	4	1113.03	-0.86566	2.5891e-26	127.29	2	27944	40321	14555	1398.3	2513.6	656.54	22254	32413	11035	250.45	0	0
661	FLCPCHGSQYNAQGR	15	2 iodo TMT-6plex var	_FLC(io)PC(io)HGSQYNAQGR_	GSBRNA2T00018506001	cytochrome b6-f complex iron-sulfur subunit, chloroplastic-like [Brassica napus]	4	585.553	-0.4261	4.4148e-28	217.68	1	14705	12978	13392	509.86	427.16	691.15	10313	10679	9483.2	619.89	372.62	0
663	FLFCAEAIYK	10	iodo TMT-6plex var	_FLFC(io)AEAIYK_	GSBRNA2T00154096001	ribulose 1,5-bisphosphate carboxylase/oxygenase large subunit (chloroplast) [Brassica juncea]	2	767.42	-0.060819	0.00020894	146.68	4	25347	41963	46220	2234.5	2856.8	2436	20955	34168	39357	1917.4	2064.3	2363.8
955	FLSEACDLVFDAASR	15	iodo TMT-6plex var	_FLSEAC(io)DLVFDAASR_	GSBRNA2T00015395001	ribosomal protein S2 (chloroplast) [Eutrema halophilum]	3	658.338	-0.076435	3.6284e-14	150.05	1	4284.8	3009.2	2988.3	440.86	381.47	265.96	4900.4	3816.8	2841.5	429.95	575.48	467.5
966	FLVFACSDSR	10	iodo TMT-6plex var	_FLVFAC(io)SDSR_	GSBRNA2T00022754001	beta carbonic anhydrase 4-like isoform X1 [Brassica napus]	3	491.929	0.36724	0.025194	46.73	1		4941.9	4459.5		703.05	536.83		3974.5	3846.9		789.53	730.11
677	FNIFSGCPSGR	11	iodo TMT-6plex var	_FNIFSGC(io)PSGR_	GSBRNA2T00060617001	T-complex protein 1 subunit eta-like [Brassica oleracea var. oleracea]	3	505.264	-0.84384	0.00736	59.198	1			2507.7			605.31			3658.9			1305.3
678	FNVANPTTGCQK	12	iodo TMT-6plex var	_FNVANPTTGC(io)QK_	GSBRNA2T00143523001	40S ribosomal protein S6-2-like [Brassica napus]	2	804.922	-0.67305	9.0619e-06	123.01	1	1068.8	656.88	922.27	566.44	385.88	240.26	1489.1	1691	1443.5	380.01	827.88	512.33
977	FPCDGPGR	8	iodo TMT-6plex var	_FPC(io)DGPGR_	GSBRNA2T00132955001	photosystem I P700 apoprotein A1 (chloroplast) [Brassica juncea]	2	589.303	0.48933	0.0043177	102	4	34035	23945	20596	4322.1	3097.5	3298.6	24911	18631	15024	6290.6	4083.9	3904
978	FPCIQIIK	8	iodo TMT-6plex var	_FPC(io)IQIIK_	GSBRNA2T00015033001	60S ribosomal protein L18a-2-like [Brassica napus]	3	430.932	-0.49494	0.0014537	107.59	3	2050	5452.1	1121.7	426.04	1463.9	468.19	3021.7	9277.1	2124.5	782.63	1817.3	395.81
979	FPENFTGCQDLAK	13	iodo TMT-6plex var	_FPENFTGC(io)QDLAK_	GSBRNA2T00068650001	photosystem I reaction center subunit N, chloroplastic-like [Brassica napus]	2	899.953	0.13264	2.2446e-13	164.64	5	11758	10713	11895	121.6	537.41	381.27	9001.5	8366.4	9991.8	885.75	1242.1	1283.1
984	FRECELIHGR	10	iodo TMT-6plex var	_FREC(io)ELIHGR_	GSBRNA2T00080643001	chlorophyll a-b binding protein CP29.2, chloroplastic [Brassica rapa]	2	794.933	0.065538	8.876e-06	145.99	1	3031.5	3057.4	5679.3	350.85	514.37	707.61	3020.2	2462.7	4530.4	649.31	689.91	654.08
985	FSASLCK	7	iodo TMT-6plex var	_FSASLC(io)K_	GSBRNA2T00127184001	protein transport protein SEC31 homolog B-like [Brassica oleracea var. oleracea]	2	542.805	-0.34008	0.025805	65.252	1	2877.2			1998.9			3156.2			2030.7
992	FSCVTGDCGNR	11	2 iodo TMT-6plex var	_FSC(io)VTGDC(io)GNR_	GSBRNA2T00090065001	osmotin-like protein [Brassica napus]	3	606.311	0.45702	0.021168	42.976	1		9229.8			562.57			10001			521.22
693	FSFCYDAMHGVAGAYAHR	18	iodo TMT-6plex var	_FSFC(io)YDAMHGVAGAYAHR_	GSBRNA2T00119392001	probable phosphoglucomutase, cytoplasmic 1 [Brassica napus]	3	778.037	-0.39866	0.00020319	62.055	1	1692.3	2759.5	2159.9	168	2048.6	173.79	1590.3	2828	1701.8	333.83	2095.9	514.27
997	FSTECANSVVPAYIPIVEK	19	iodo TMT-6plex var	_FSTEC(io)ANSVVPAYIPIVEK_	GSBRNA2T00064008001	coproporphyrinogen-III oxidase 1, chloroplastic [Brassica oleracea var. oleracea]	3	799.429	-0.33194	0.00019114	62.617	1	821.98	1301.8		479.07	1156.9		843.59	1050.5		472.43	870.76
1001	FSYGEPMTVESTTQALCDLALR	22	iodo TMT-6plex var	_FSYGEPMTVESTTQALC(io)DLALR_	GSBRNA2T00125516001	proteasome subunit alpha type-5-A [Brassica napus]	3	921.129	0.016508	3.9514e-05	65.887	1	751.02	1074.9		269.65	205.22		1379.5	1409.8		352.04	290.37
1003	FTFCYDALHGVAGAYAHR	18	iodo TMT-6plex var	_FTFC(io)YDALHGVAGAYAHR_	GSBRNA2T00073060001	probable phosphoglucomutase, cytoplasmic 1 [Brassica napus]	4	582.794	0.28407	2.1478e-05	73.833	1	618.59			824.12			1123.2			727.29
702	FVCSAVNK	8	iodo TMT-6plex var	_FVC(io)SAVNK_	GSBRNA2T00025155001	fructose-1,6-bisphosphatase, cytosolic [Brassica napus]	2	598.837	-0.47434	0.0058136	95.815	1			1579.1			557.71			1802.9			590.67
1010	FVDCLNDAK	9	iodo TMT-6plex var	_FVDC(io)LNDAK_	GSBRNA2T00069603001	probable fructose-bisphosphate aldolase 3, chloroplastic [Brassica napus]	2	677.355	-0.0016838	0.00099245	103.26	1	3864.3	3584		694.39	977.55		3974.1	3975.1		1349.8	1233.8
1016	FVLSAGHGCMLLYALLHLAGYDSVLEEDLK	30	Oxidation (M),iodo TMT-6plex var	_FVLSAGHGC(io)M(ox)LLYALLHLAGYDSVLEEDLK_	GSBRNA2T00155495001	transketolase-1, chloroplastic-like [Brassica napus]	4	906.477	0.25406	3.9232e-10	82.6	1	771.99	596.86		0	234.66		781.59	714.01		0	398.82
1020	FVNSGTEACMGVLR	14	iodo TMT-6plex var	_FVNSGTEAC(io)MGVLR_	GSBRNA2T00134647001	glutamate-1-semialdehyde 2,1-aminomutase, chloroplastic-like [Brassica napus]	2	906.969	-0.2233	2.3513e-16	167.03	1	4991.2	3472	3032.1	531.1	390.49	652.56	6559.6	4539.3	3675.8	812.21	831.52	931.15
1021	FVPILCGSAFK	11	iodo TMT-6plex var	_FVPILC(io)GSAFK_	GSBRNA2T00050545001	elongation factor G, chloroplastic [Brassica napus]	3	504.293	0.17802	0.0062974	60.255	2	3517.1	5438.3	2833.4	1014.3	1218.7	409.43	5258.7	8333.3	4228.6	1183.8	1565	413.95
1025	FVQVEGGFACALDLVNHIR	19	iodo TMT-6plex var	_FVQVEGGFAC(io)ALDLVNHIR_	GSBRNA2T00105985001	methylenetetrahydrofolate reductase 1 [Brassica oleracea var. oleracea]	4	605.079	0.003217	2.1553e-05	69.979	1	964.59			0			1063.1			263.64
1032	FVVDGSQDECARR	13	iodo TMT-6plex var	_FVVDGSQDEC(io)ARR_	GSBRNA2T00118903001	---	2	905.957	0.24545	0.0033349	61.11	1		505.69			168.12			596.7			288.3
1033	FVVYTLPPLGCLPIVR	16	iodo TMT-6plex var	_FVVYTLPPLGC(io)LPIVR_	GSBRNA2T00062345001	GDSL esterase/lipase At1g54020-like precursor [Brassica napus]	3	706.09	0.094351	0.0011143	60.55	1		2344.6	2268.1		609.56	238.58		1136.9	904.48		389.64	345.86
1036	FWEVVCAEHGIDPTGR	16	iodo TMT-6plex var	_FWEVVC(io)AEHGIDPTGR_	GSBRNA2T00107228001	tubulin beta-2 chain [Raphanus sativus]	3	715.696	0.63506	3.1195e-05	81.656	1		3247.6			875.61			3116.6			790.76
1044	FYCPIVNLDK	10	iodo TMT-6plex var	_FYC(io)PIVNLDK_	GSBRNA2T00033180001	60S ribosomal protein L27a-2-like [Brassica oleracea var. oleracea]	2	770.923	0.6084	6.6123e-05	118.04	1	4566.2	2870.7	2621.4	1613.6	348.35	391.24	6836	4520.2	4003.8	2214.7	829.95	698.42
1046	FYCWDTAGQEK	11	iodo TMT-6plex var	_FYC(io)WDTAGQEK_	GSBRNA2T00148946001	26S protease regulatory subunit 8 homolog A-like [Brassica rapa]	2	838.901	0.15792	4.5924e-11	168.71	1		5123.4	3623.8		421.28	331.04		6467.3	4776		712.52	465.16
1040	FYGDDFYMCR	10	iodo TMT-6plex var	_FYGDDFYMC(io)R_	GSBRNA2T00127623001	AB hydrolase superfamily protein YfhM-like [Brassica oleracea var. oleracea]	3	549.25	0.096609	0.021108	50.194	1	3069.4			678.83			2345.5			572.5
1042	FYGTIPEIVCELSSLK	16	iodo TMT-6plex var	_FYGTIPEIVC(io)ELSSLK_	GSBRNA2T00091119001	leucine-rich repeat extensin-like protein 3 [Raphanus sativus]	3	710.057	0.69846	0.0044203	51.03	1	1540.7			277.85			935.59			107.23
730	FYTECLGMK	9	iodo TMT-6plex var	_FYTEC(io)LGMK_	GSBRNA2T00112939001	probable lactoylglutathione lyase, chloroplast [Brassica napus]	3	474.244	-0.55744	0.0044094	74.464	1	5974.3	6032.9	4833.1	2028.9	1862.1	933.33	4734.4	4576.2	3508	2399.5	2128	1783.8
1052	FYTGFPVYCVR	11	iodo TMT-6plex var	_FYTGFPVYC(io)VR_	GSBRNA2T00154281001	mitochondrial dicarboxylate/tricarboxylate transporter DTC-like [Brassica napus]	2	840.942	0.36623	4.5011e-07	140.49	2	7085	4623.9	5698.7	291.54	261.43	375.32	6115.3	3937.5	5295.3	1093.6	635.27	766.18
1059	GACEIAPDFPASSCNR	16	2 iodo TMT-6plex var	_GAC(io)EIAPDFPASSC(io)NR_	GSBRNA2T00104751001	subtilisin-like protease SBT1.4 [Brassica rapa]	4	574.795	-0.17948	0.00095021	59.673	2	1830	5834.5	2153.7	407.07	826.75	529.12	1622.7	4994.5	1738.5	631.15	1478.2	623.38
1057	GAECEEADVAK	11	iodo TMT-6plex var	_GAEC(io)EEADVAK_	GSBRNA2T00040441001	momilactone A synthase [Brassica napus]	2	725.856	0.60913	0.0001299	97.734	1	2203.1			685.27			1615.3			917.68
1060	GALGGTCLNVGCIPSK	16	2 iodo TMT-6plex var	_GALGGTC(io)LNVGC(io)IPSK_	GSBRNA2T00156322001	dihydrolipoyl dehydrogenase 1, mitochondrial [Brassica rapa]	3	716.739	0.27375	1.3693e-08	107.98	1	6453	2528.4	2799.6	348.65	208.68	0	4318	2061.3	1809.2	508.76	230.42	0
1065	GASYYNCR	8	iodo TMT-6plex var	_GASYYNC(io)R_	GSBRNA2T00151201001	protein RALF-like 33 [Brassica rapa]	2	631.811	0.059937	0.041833	54.611	1	6934.7			1025.5			7987			1072.3
1067	GCALQCAILSPTFK	14	2 iodo TMT-6plex var	_GC(io)ALQC(io)AILSPTFK_	GSBRNA2T00024636001	---	3	704.069	0.2254	2.5842e-07	109.6	1	5413.2		4010.7	494.44		871.52	6308.1		5826.3	557.55		958.24
1068	GCCGTGTVETTSLLCNPK	18	3 iodo TMT-6plex var	_GC(io)C(io)GTGTVETTSLLC(io)NPK_	GSBRNA2T00044749001	GDSL esterase/lipase APG-like [Brassica napus]	4	693.626	-0.51438	9.7074e-10	105.28	1	2439.6	6532.2	2787.9	295.6	833.74	388.07	4579.8	11381	4962	130.52	737.05	277.62
1070	GCCGTGTYEYGETCK	15	3 iodo TMT-6plex var	_GC(io)C(io)GTGTYEYGETC(io)K_	GSBRNA2T00096872001	GDSL esterase/lipase At5g45950 [Brassica napus]	5	512.658	0.15306	6.588e-06	92.939	1	14936	10523	6551.7	1462.6	1169	773.67	15139	9449.8	6587.1	922.62	1200.1	485.59
1072	GCCMGPK	7	2 iodo TMT-6plex var	_GC(io)C(io)MGPK_	GSBRNA2T00128690001	60S ribosomal protein L3-1 [Brassica napus]	3	451.912	0.12212	0.013299	59.609	1	11745	14176		1086.1	1417.8		18197	21070		1029.3	1219.4
742	GCCSGVQR	8	2 iodo TMT-6plex var	_GC(io)C(io)SGVQR_	GSBRNA2T00090796001	non-specific lipid-transfer protein 5-like [Brassica napus]	4	367.704	-1.0588	0.020287	47.443	1			60885			7045.7			59541			6511.4
743	GCFFTSSGGLR	11	iodo TMT-6plex var	_GC(io)FFTSSGGLR_	GSBRNA2T00097529001	stem-specific protein TSJT1 [Brassica napus]	2	730.88	-0.46934	0.004812	73.499	1	5063.1		5955.4	733.88		534.67	5712.7		5677.9	1457.7		759.93
1076	GCGPTVVR	8	iodo TMT-6plex var	_GC(io)GPTVVR_	GSBRNA2T00154281001	mitochondrial dicarboxylate/tricarboxylate transporter DTC-like [Brassica napus]	3	373.216	-0.64575	0.020939	57.047	1	17243			4177.2			16631			6528.6
1077	GCIVSQDLSVLNLVIVK	17	iodo TMT-6plex var	_GC(io)IVSQDLSVLNLVIVK_	GSBRNA2T00143523001	40S ribosomal protein S6-2-like [Brassica napus]	3	710.424	0.33427	3.823e-06	83.54	1	512.75			421.56			468.49			273.12
1078	GCLLVGPPGTGK	12	iodo TMT-6plex var	_GC(io)LLVGPPGTGK_	GSBRNA2T00102109001	ATP-dependent zinc metalloprotease FTSH 1, chloroplastic [Brassica rapa]	3	476.613	-0.87559	0.0043545	61.194	2	4580.8	3551.6	1904.1	1988.4	2869.9	1100.2	5367.3	3896.8	2075	2008.6	3209.9	1328.3
1078	GCSYCPTPPLSSPFELLSPSDAMK	24	2 iodo TMT-6plex var	_GC(io)SYC(io)PTPPLSSPFELLSPSDAMK_	GSBRNA2T00018871001	photosynthetic NDH subunit of subcomplex B 2, chloroplastic-like [Brassica napus]	4	797.158	0.11384	6.4811e-09	82.635	1		1270.1			0			997.35			0
748	GCVASVAAK	9	iodo TMT-6plex var	_GC(io)VASVAAK_	GSBRNA2T00045139001	---	2	567.829	-0.90062	0.0015628	120.15	1	10468	5457.2	5274.1	1291.1	901.76	341.16	8040.8	4061.7	4078.5	1920.4	1094.9	617.61
1082	GCYPIFK	7	iodo TMT-6plex var	_GC(io)YPIFK_	GSBRNA2T00153407001	ribosomal protein L22 (chloroplast) [Brassica juncea]	2	578.823	-0.059554	0.014104	81.1	2	3732	4065.4	5588.5	2083.6	2203.4	1064.5	4955.8	4522.8	6829.5	1946.4	2197.4	1782
1083	GDANVIECSFVASQVTELAFFATK	24	iodo TMT-6plex var	_GDANVIEC(io)SFVASQVTELAFFATK_	GSBRNA2T00143566001	malate dehydrogenase 2, glyoxysomal [Brassica oleracea var. oleracea]	3	959.495	-0.73091	3.761e-05	56.681	1		867.62			118.95			654.43			0
1083	GDEAFQAEICDIYCR	15	2 iodo TMT-6plex var	_GDEAFQAEIC(io)DIYC(io)R_	GSBRNA2T00089776001	---	3	797.733	0.43922	1.8294e-07	107.35	1	6509.4	4996.5	5093.2	419.58	324.74	332.22	7299.5	6201.2	6275.1	224.67	242.16	0
1084	GDEAFQAEICDTYCR	15	2 iodo TMT-6plex var	_GDEAFQAEIC(io)DTYC(io)R_	GSBRNA2T00145115001	protein TIC110, chloroplastic [Brassica oleracea var. oleracea]	3	793.721	-0.59696	1.8294e-07	107.35	2	7282	5499.3		802.4	453.02		9145.4	6492.4		441.28	289.3
754	GDFTILLSNIVLGCK	15	iodo TMT-6plex var	_GDFTILLSNIVLGC(io)K_	GSBRNA2T00025155001	fructose-1,6-bisphosphatase, cytosolic [Brassica napus]	3	641.371	0.013053	0.00061843	69.92	1	2031.2	1579.5	816.71	0	262.17	0	1487.4	1457.7	805.36	327.46	434.34	113.99
1094	GDLVICPEGTTCR	13	2 iodo TMT-6plex var	_GDLVIC(io)PEGTTC(io)R_	GSBRNA2T00020989001	---	3	674.701	0.024521	0.00091442	67.952	1	4476.9	5776.2		531.94	826.15		4684.3	6029.7		403.83	652.06
1101	GEGPAIGIDLGTTYSCVGVWQHDR	24	iodo TMT-6plex var	_GEGPAIGIDLGTTYSC(io)VGVWQHDR_	GSBRNA2T00007549001	probable mediator of RNA polymerase II transcription subunit 37c [Brassica napus]	3	954.146	-0.049027	5.0366e-11	95.926	2	2311.3	3830.1	1502.4	579.02	451.33	347.25	3618.1	6189.4	1986.1	720.37	279.12	411.51
1103	GEICDINGNCVDAAEDELFR	20	2 iodo TMT-6plex var	_GEIC(io)DINGNC(io)VDAAEDELFR_	GSBRNA2T00151596001	ATP synthase gamma chain 1, chloroplastic [Brassica napus]	3	947.802	0.1731	2.932e-22	149.84	1	14713	14770	12406	788.2	686.65	546.23	8989.5	9192.4	8242.4	262.24	227.45	0
1105	GEIDTELTIVMSSIAMACK	19	iodo TMT-6plex var	_GEIDTELTIVMSSIAMAC(io)K_	GSBRNA2T00054544001	fructose-1,6-bisphosphatase, chloroplastic-like [Brassica napus]	3	781.072	-0.22648	1.1668e-05	72.359	1	1124.8	1502.2	978.65	873.88	1217.5	121.16	1424.1	1661.9	710.2	855.44	1106.5	715.85
1105	GELQCIGATTLDEYR	15	iodo TMT-6plex var	_GELQC(io)IGATTLDEYR_	GSBRNA2T00142211001	chaperone protein ClpC1, chloroplastic [Brassica napus]	3	666.677	0.81167	6.3579e-06	93.909	1	2021	1644.4		196.03	207.07		2044.8	1822.4		121.15	110.73
1112	GETLQEYWWCTER	13	iodo TMT-6plex var	_GETLQEYWWC(io)TER_	GSBRNA2T00025157001	adenosylhomocysteinase 1-like isoform X2 [Brassica napus]	2	1015.49	0.52518	3.8272e-18	184.21	1	4888.2	4690.4	3668.9	480.52	477.76	262.51	7056.9	8433.8	5187.6	898.71	420.75	594.27
773	GFFEVTHDISNLTCADFLR	19	iodo TMT-6plex var	_GFFEVTHDISNLTC(io)ADFLR_	GSBRNA2T00102833001	catalase-3 [Brassica napus]	3	838.76	0.10895	5.3773e-36	219.23	1	5977.8	6893.7	9354.2	316.8	587.66	357.64	4986.4	6634.9	8319.8	497.28	885.62	898.79
1131	GFNISCVGIIVYR	13	iodo TMT-6plex var	_GFNISC(io)VGIIVYR_	GSBRNA2T00135657001	ADP,ATP carrier protein 1, mitochondrial-like [Brassica rapa]	2	885.5	0.19251	2.9776e-05	95.264	1		3424.6	1571		1264.7	512.82		3102.5	1490.4		935.82	533.61
1138	GFVLTCVAYPQSDCVIHTHK	20	2 iodo TMT-6plex var	_GFVLTC(io)VAYPQSDC(io)VIHTHK_	GSBRNA2T00045275001	ferredoxin, root R-B2 [Brassica napus]	5	576.112	0.33882	0.00061971	52.185	1		1973.9			305.11			1602.7			413.74
1133	GFVQFCYEPIK	11	iodo TMT-6plex var	_GFVQFC(io)YEPIK_	GSBRNA2T00028785001	---	3	553.964	-0.27172	0.0010688	78.342	1	2951.2	2838.3	4605.3	580.2	348.62	663.46	4287.9	4217.7	6503.4	572.89	604.19	1191.8
789	GGDNILVICDTYTPAGEPIPTNK	23	iodo TMT-6plex var	_GGDNILVIC(io)DTYTPAGEPIPTNK_	GSBRNA2T00092908001	glutamine synthetase, chloroplastic-like [Brassica napus]	3	906.472	-0.11396	2.2042e-08	79.589	2	4839.2	5967.1	4414.1	272.63	262.1	0	4290.8	5215.7	3580.9	0	269.92	102.27
1155	GGNPDSNTLISDMTTVICLDDYHSLDR	27	iodo TMT-6plex var	_GGNPDSNTLISDMTTVIC(io)LDDYHSLDR_	GSBRNA2T00025724001	---	3	1094.53	-0.75006	7.224e-16	104.6	1	4430.2	4431.4	1244.6	255.23	266.93	203.48	3712.1	3458.4	1067.8	273.73	0	197.26
814	GHYLNATAGTCEEMMK	16	iodo TMT-6plex var	_GHYLNATAGTC(io)EEMMK_	GSBRNA2T00154096001	ribulose 1,5-bisphosphate carboxylase/oxygenase large subunit (chloroplast) [Brassica juncea]	2	1042.99	-0.82266	3.2675e-34	235.35	2	37976	29219	23588	4052.5	3151.8	2386	32197	26910	20643	5443.3	4054.2	3845.6
1180	GHYLNATAGTCEEMMKR	17	Oxidation (M),iodo TMT-6plex var	_GHYLNATAGTC(io)EEM(ox)MKR_	GSBRNA2T00154096001	ribulose 1,5-bisphosphate carboxylase/oxygenase large subunit (chloroplast) [Brassica juncea]	4	565.024	-0.26149	3.6948e-08	101.04	2	3044.9	3090.1	4611.2	403.69	543.27	677.59	2351.4	2534.5	3222.8	614.11	691.55	900.2
1187	GIELYCAPTADGSK	14	iodo TMT-6plex var	_GIELYC(io)APTADGSK_	GSBRNA2T00022976001	nitrilase 2-like [Brassica rapa]	2	877.453	-0.17252	1.2074e-16	157.86	1	2289.9	4265		495.03	266.08		2291.2	3265.8		518.08	622.77
825	GIGDCFGR	8	iodo TMT-6plex var	_GIGDC(io)FGR_	GSBRNA2T00135657001	ADP,ATP carrier protein 1, mitochondrial-like [Brassica rapa]	2	577.303	-1.0077	0.0051675	98.458	1			9253.6			1320.6			9366.2			1387
1183	GIGFEICR	8	iodo TMT-6plex var	_GIGFEIC(io)R_	GSBRNA2T00149240001	(+)-neomenthol dehydrogenase-like isoform X2 [Brassica napus]	3	408.564	-0.67934	0.041008	43.769	1	14077			1571.6			12764			1904.3
1191	GIGPCYSSK	9	iodo TMT-6plex var	_GIGPC(io)YSSK_	GSBRNA2T00098876001	adenylosuccinate synthetase, chloroplastic-like [Raphanus sativus]	2	620.832	0.22842	0.011647	69.275	1		2068	1645.1		897.24	270.06		2244.6	2213.4		953	716.39
1186	GILAIDESNATCGK	14	iodo TMT-6plex var	_GILAIDESNATC(io)GK_	GSBRNA2T00069603001	probable fructose-bisphosphate aldolase 3, chloroplastic [Brassica napus]	3	574.308	-0.014027	4.0869e-05	85.45	1	2161			486.55			1846.6			712.42
1189	GILAMDESNATCGK	14	iodo TMT-6plex var	_GILAMDESNATC(io)GK_	GSBRNA2T00150881001	probable fructose-bisphosphate aldolase 2, chloroplastic [Brassica napus]	2	869.937	-0.31515	1.0002e-27	208.82	3	12775	5918.6	12229	5676.2	2439.1	4869.9	12450	5230.6	10262	5152.3	2190.6	4891.5
1200	GILDVCDEPLVSVDFR	16	iodo TMT-6plex var	_GILDVC(io)DEPLVSVDFR_	GSBRNA2T00105394001	glyceraldehyde-3-phosphate dehydrogenase GAPA2, chloroplastic [Brassica napus]	2	1053.56	0.11537	9.4791e-14	130.29	1	5762.8	10196	5061.1	352.24	678.09	534.85	4263.7	7095.7	3714.1	636.34	691.37	534.03
842	GISACAICDGASPLFK	16	2 iodo TMT-6plex var	_GISAC(io)AIC(io)DGASPLFK_	GSBRNA2T00132779001	NADPH-dependent thioredoxin reductase 3 [Brassica rapa]	4	553.556	-0.56396	0.0031509	50.077	1	2607.4		3188	0		301.12	1620.6		3006.5	275.01		346.44
1210	GISACAVCDGAAPIFR	16	2 iodo TMT-6plex var	_GISAC(io)AVC(io)DGAAPIFR_	GSBRNA2T00053564001	thioredoxin reductase 2-like [Brassica napus]	4	553.055	0.16737	0.0055929	47.478	1	2901	4081.7		0	316.02		2946.7	4464.6		0	358.7
1207	GISAGQGASCGFGMR	15	iodo TMT-6plex var	_GISAGQGASC(io)GFGMR_	GSBRNA2T00078010001	50S ribosomal protein L15, chloroplastic-like [Brassica napus]	2	864.43	-0.30615	6.2839e-16	156.2	1	4518.6	4673.3	4553.2	1352.8	1878.9	1362.7	5398.6	6801.9	5712.7	1794.8	2135.4	2310.6
1208	GISLSEQQLVDCAGAFNNYGCNGGLPSQAFEYIK	34	2 iodo TMT-6plex var	_GISLSEQQLVDC(io)AGAFNNYGC(io)NGGLPSQAFEYIK_	GSBRNA2T00133095001	thiol protease aleurain [Brassica oleracea var. oleracea]	4	1063.79	-0.82952	8.2884e-05	44.564	1	2700.9			622.57			1387.9			562.31
1222	GKPVVVYFYPADETPGCTK	19	iodo TMT-6plex var	_GKPVVVYFYPADETPGC(io)TK_	GSBRNA2T00040575001	peroxiredoxin Q, chloroplastic isoform X2 [Brassica napus]	3	800.754	0.5147	7.6675e-06	77.871	1	1989.9	1753.8	3233.6	653.06	634.56	969.12	1366.3	1699.5	2633.8	1043.7	645.35	1100.1
1227	GLADLEAAACLCTALK	16	2 iodo TMT-6plex var	_GLADLEAAAC(io)LC(io)TALK_	GSBRNA2T00051635001	14 kDa proline-rich protein DC2.15-like [Brassica napus]	3	741.086	0.38919	3.8776e-06	91.355	1	5238.3	5244.4	4034.8	122.79	174.87	108.44	3473.6	4183.9	3463.9	266.92	280.77	114.52
1229	GLCAIAQAESLR	12	iodo TMT-6plex var	_GLC(io)AIAQAESLR_	GSBRNA2T00014595001	---	2	780.94	0.40446	0.0039473	66.989	2		3716.5			843.78			5186.8			1026.6
1231	GLCGGFNNFIIK	12	iodo TMT-6plex var	_GLC(io)GGFNNFIIK_	GSBRNA2T00151596001	ATP synthase gamma chain 1, chloroplastic [Brassica napus]	3	537.967	0.22126	1.3111e-05	105.4	2	4454.6	4235.7	4041.7	564.88	203.19	596.11	3346.8	3275.7	3233	901.02	606.09	708.7
1234	GLEECMGSGVLAGFPVVDVR	20	iodo TMT-6plex var	_GLEEC(io)MGSGVLAGFPVVDVR_	GSBRNA2T00086390001	elongation factor G, chloroplastic [Brassica rapa]	3	788.747	-0.061542	0.0004182	54.668	1	1056.9			253			1075.8			485.97
1235	GLEECMSSGVLAGFPVVDVR	20	iodo TMT-6plex var	_GLEEC(io)MSSGVLAGFPVVDVR_	GSBRNA2T00050545001	elongation factor G, chloroplastic [Brassica napus]	3	798.75	0.1577	0.00012199	63.706	1	1602.3			537.29			1803.4			641.48
1243	GLFSFYEDGHQECCR	15	2 iodo TMT-6plex var	_GLFSFYEDGHQEC(io)C(io)R_	GSBRNA2T00124039001	5'-adenylylsulfate reductase 2, chloroplastic [Brassica oleracea var. oleracea]	5	490.642	0.086368	9.9162e-05	78.814	1	5492.6	7455.6	3408.5	694.32	820.47	607.2	10948	12926	5150.5	702.47	570.8	417.47
867	GLIGQIICR	9	iodo TMT-6plex var	_GLIGQIIC(io)R_	GSBRNA2T00032503001	nucleoside diphosphate kinase 1-like [Brassica napus]	2	651.4	-0.44891	0.0015392	119.41	1	6258.9	6790.5	5168	989.63	782.32	658.53	8459.9	8963.1	7234.3	658.41	915.4	639.57
1251	GLQCCVR	7	2 iodo TMT-6plex var	_GLQC(io)C(io)VR_	GSBRNA2T00009509001	glutamate--tRNA ligase, cytoplasmic [Brassica napus]	4	359.961	-0.23372	0.015734	57.463	1		11158			2405.4			14118			2458.6
1255	GLVACTGSQFCGQAIIETK	19	2 iodo TMT-6plex var	_GLVAC(io)TGSQFC(io)GQAIIETK_	GSBRNA2T00088147001	ferredoxin--nitrite reductase, chloroplastic-like [Brassica napus]	4	646.855	0.65593	1.8283e-07	86.8	1	2176.9	2298.8	3554.8	225.5	328.72	0	2063.3	2134.3	3792.9	271.21	234.81	0
1257	GLVEVEAAACLCTTLK	16	2 iodo TMT-6plex var	_GLVEVEAAAC(io)LC(io)TTLK_	GSBRNA2T00135010001	36.4 kDa proline-rich protein [Brassica oleracea var. oleracea]	4	570.577	0.23534	1.6233e-06	93.424	1	1742.9	2553.6	1734.4	280.08	299.48	248.09	1846.7	2125.6	1708.5	295.13	598.47	122.61
1258	GLVGEIICR	9	iodo TMT-6plex var	_GLVGEIIC(io)R_	GSBRNA2T00070915001	nucleoside diphosphate kinase 1-like [Brassica rapa]	2	644.884	0.38036	0.0011388	104.2	1	6590.2	5709.4	5375.7	974.72	777.31	687.14	9802.7	6483.9	7454.8	1110.8	1013.9	905.95
878	GLVPLVGSNDESWCQGLDGLASR	23	iodo TMT-6plex var	_GLVPLVGSNDESWC(io)QGLDGLASR_	GSBRNA2T00108101001	probable fructose-bisphosphate aldolase 1, chloroplastic [Brassica oleracea var. oleracea]	3	901.464	0.58992	7.1536e-20	148.75	1	7323.7	5934.9	4684.4	653.63	221.13	225.55	5857.7	5544.9	4131	1185.9	890.48	491.05
1263	GLVPLVGSNNESWCQGLDGLSSR	23	iodo TMT-6plex var	_GLVPLVGSNNESWC(io)QGLDGLSSR_	GSBRNA2T00150881001	probable fructose-bisphosphate aldolase 2, chloroplastic [Brassica napus]	3	906.467	-0.19655	4.2999e-37	181.54	2	8206.1	7812.4	17740	451.56	100.06	1647.3	7063.8	6397.3	15705	1225.9	571.19	2576.9
1265	GMCVACPTPK	10	2 iodo TMT-6plex var	_GMC(io)VAC(io)PTPK_	GSBRNA2T00148028001	epidermis-specific secreted glycoprotein EP1-like [Brassica oleracea var. oleracea]	3	555.64	-0.27448	0.0096766	54.066	1		3530.2			440.27			3495.1			769.43
1287	GNNILVMCDAYTPAGEPIPTNK	22	iodo TMT-6plex var	_GNNILVMC(io)DAYTPAGEPIPTNK_	GSBRNA2T00143205001	glutamine synthetase cytosolic isozyme 1-4-like [Brassica napus]	3	883.119	0.2257	0.001249	47.603	1		2159.2			113.64			1022.8			216.87
1284	GNYLCCK	7	2 iodo TMT-6plex var	_GNYLC(io)C(io)K_	GSBRNA2T00058714001	serine carboxypeptidase-like 7 isoform X1 [Brassica rapa]	3	486.937	-0.097375	0.034701	43.124	1	11585	7859.1		1200.2	1097.3		10560	7437.4		1566.4	1280.4
1287	GPCVSDNNCANVCHNEGFGGGK	22	3 iodo TMT-6plex var	_GPC(io)VSDNNC(io)ANVC(io)HNEGFGGGK_	GSBRNA2T00003541001	defensin-like protein 1 [Brassica napus]	4	792.394	0.14778	9.7677e-05	55.844	1	6462.6			135.34			4641.5			0
1299	GPQNPSGYSCK	11	iodo TMT-6plex var	_GPQNPSGYSC(io)K_	GSBRNA2T00154216001	germin-like protein 1 [Brassica napus]	3	489.58	0.40144	5.4175e-06	113.22	1	9134.3	8858.7	8639.3	1004.9	1084.6	696.73	8649.4	8027.1	8314.2	1117.6	1275.2	867.35
910	GPTPEPLCQVMLR	13	iodo TMT-6plex var	_GPTPEPLC(io)QVMLR_	GSBRNA2T00112939001	probable lactoylglutathione lyase, chloroplast [Brassica napus]	3	590.658	-0.47883	0.00064764	76.326	1	6082.3	3990.8	2248.8	1163.6	953.65	341.78	4518.2	3201.8	1695.8	1430.4	886.35	464.64
919	GSDWLGDQDAIQYMCR	16	iodo TMT-6plex var	_GSDWLGDQDAIQYMC(io)R_	GSBRNA2T00046166001	succinate dehydrogenase [ubiquinone] flavoprotein subunit 1, mitochondrial isoform X3 [Brassica napus]	3	729.677	-0.76211	0.00012605	75.764	1			1699.3			357.44			1664.2			394.76
1319	GTCVSSTNCGNVCHNEGFGGGK	22	3 iodo TMT-6plex var	_GTC(io)VSSTNC(io)GNVC(io)HNEGFGGGK_	GSBRNA2T00115416001	defensin-like protein 1 [Brassica napus]	5	623.915	0.17113	4.5652e-05	62.589	1	6056.1	3366.3	7454.5	680.91	282.94	437.96	5741.7	3440.7	6752.8	141.8	0	0
930	GTGTANQCPTIDGGSETFSFK	21	iodo TMT-6plex var	_GTGTANQC(io)PTIDGGSETFSFK_	GSBRNA2T00081678001	---	3	816.395	-0.31118	1.0021e-09	105.06	1	3196	2077.1	2903.7	0	0	124.58	2948.7	1440.7	2110	0	0	0
932	GTGTANQCPTIDGGSETFSFKPGK	24	iodo TMT-6plex var	_GTGTANQC(io)PTIDGGSETFSFKPGK_	GSBRNA2T00081678001	---	3	910.452	-0.40156	1.0425e-13	109.91	1	4236.8	5270.3	3152.1	280.23	123.85	139.54	2940.4	3897.3	2224.3	0	0	0
935	GVAADLSHCNTPSQVR	16	iodo TMT-6plex var	_GVAADLSHC(io)NTPSQVR_	GSBRNA2T00033625001	malate dehydrogenase, chloroplastic [Brassica napus]	3	662.013	-0.24972	8.6452e-05	76.82	1			1899.2			742.74			2292.5			624.2
1332	GVAGLFDYGPPGCAVK	16	iodo TMT-6plex var	_GVAGLFDYGPPGC(io)AVK_	GSBRNA2T00105563001	glycine--tRNA ligase 1, mitochondrial-like [Brassica oleracea var. oleracea]	3	627.336	0.074375	0.002889	53.3	1		1382.8			244.23			1511			528.17
1329	GVCHVALAQEGHCR	14	2 iodo TMT-6plex var	_GVC(io)HVALAQEGHC(io)R_	GSBRNA2T00077191001	3-isopropylmalate dehydratase large subunit-like [Brassica napus]	3	713.387	0.19745	2.0786e-10	125.89	1	4984.9	6255.8		441.97	288.94		6913.6	7575		293.41	334.15
1330	GVCPVVGCR	9	2 iodo TMT-6plex var	_GVC(io)PVVGC(io)R_	GSBRNA2T00090065001	osmotin-like protein [Brassica napus]	3	516.635	0.13691	0.00029529	108.7	1	15743	15505	15339	984.9	952.99	998.86	17059	16520	16648	951.71	985.69	567.64
1332	GVCSNFLCDLKPGDEAK	17	2 iodo TMT-6plex var	_GVC(io)SNFLC(io)DLKPGDEAK_	GSBRNA2T00005645001	ferredoxin--NADP reductase, leaf isozyme 1, chloroplastic-like [Brassica napus]	4	614.328	-0.32622	2.4776e-18	150.91	2	8655.1	9266.8	9229.4	541.16	515.02	510.94	8663.6	8618.9	8818.6	587.54	381.73	350.52
1334	GVCSNFLCDLKPGSDVK	17	2 iodo TMT-6plex var	_GVC(io)SNFLC(io)DLKPGSDVK_	GSBRNA2T00076633001	ferredoxin--NADP reductase, leaf isozyme 2, chloroplastic [Brassica napus]	4	610.833	-0.44387	5.2478e-11	114.03	2	11112	9624.6	5228.1	496.54	499.5	241.43	9042.1	7620.2	4902.1	257.69	350.45	0
1337	GVDEFPFCVHLVSWEK	16	iodo TMT-6plex var	_GVDEFPFC(io)VHLVSWEK_	GSBRNA2T00066548001	60S ribosomal protein L10-3-like [Brassica napus]	4	556.038	-0.029104	0.00048587	65.231	1	855.77			394.89			904.24			419.77
947	GVFTFVCK	8	iodo TMT-6plex var	_GVFTFVC(io)K_	GSBRNA2T00088545001	60S acidic ribosomal protein P3-2-like [Brassica napus]	2	615.349	-0.77588	0.0079981	90.308	1	2595.5	3546.8	3698	214.04	320.95	204.05	4689.6	5134.8	5418.5	406.75	323.61	283.77
948	GVLEVCDTPLVSCDFR	16	2 iodo TMT-6plex var	_GVLEVC(io)DTPLVSC(io)DFR_	GSBRNA2T00088488001	glyceraldehyde-3-phosphate dehydrogenase GAPB, chloroplastic [Brassica oleracea var. oleracea]	3	804.432	-0.24444	2.8066e-16	176.29	2	28449	34161	33773	908.74	1749.6	1916.4	20609	24355	23844	591.48	359.28	124.6
1346	GVLFYGPPGCGK	12	iodo TMT-6plex var	_GVLFYGPPGC(io)GK_	GSBRNA2T00073226001	cell division control protein 48 homolog A [Brassica oleracea var. oleracea]	2	762.416	0.12213	0.0018576	72.2	1	2394.1	1711.4	2112.1	903.13	623.21	1263.6	3049.2	2485.5	2953.1	1025.2	739.96	1495.2
1348	GVMQILNCVIR	11	iodo TMT-6plex var	_GVMQILNC(io)VIR_	GSBRNA2T00073054001	glutamate--glyoxylate aminotransferase 1 [Brassica napus]	3	525.641	-0.19996	0.0023607	68.525	1	4573.9	3521.9		553.09	309.06		3888.9	3358.3		466.61	410.53
1360	GVSFMVDNCSTTAR	14	iodo TMT-6plex var	_GVSFMVDNC(io)STTAR_	GSBRNA2T00155699001	---	3	606.301	-0.0361	3.1925e-05	88.282	1	2497.4	2982.2	2827.1	843.1	888.58	904.26	3139.8	3962.1	4160.2	1152.9	1083.5	1378.9
1361	GVSFSIDCSKPVDDK	15	iodo TMT-6plex var	_GVSFSIDC(io)SKPVDDK_	GSBRNA2T00119982001	60S ribosomal protein L22-2-like [Brassica napus]	3	642.666	-0.14295	0.00037913	69.431	1	2995.2	1956	1406.6	686.13	447.66	512.26	3303.8	1956.5	1726.3	1418.6	645.32	590.17
1371	GWVPTLLGYSAQGACK	16	iodo TMT-6plex var	_GWVPTLLGYSAQGAC(io)K_	GSBRNA2T00151863001	---	3	660.691	0.36451	1.2283e-07	101.3	1		1416.3			403.34			1216.9			777.37
1369	GYALLCASYPTSDCHIK	17	2 iodo TMT-6plex var	_GYALLC(io)ASYPTSDC(io)HIK_	GSBRNA2T00043644001	ferredoxin-1-like [Brassica napus]	4	625.833	-0.016782	1.4053e-05	81.346	2	6474.6		1640.4	582.64		0	7863.7		2522.6	757.26		251.46
965	GYFAWALGDNYEFCK	15	iodo TMT-6plex var	_GYFAWALGDNYEFC(io)K_	GSBRNA2T00035009001	---	3	705.007	0.5621	2.0796e-13	162.93	2	6665.1	6144.1	5340.8	248.35	235.68	249.78	4560.4	5041.5	4235.3	446.7	758.73	785.1
1386	GYWGECGQR	9	iodo TMT-6plex var	_GYWGEC(io)GQR_	GSBRNA2T00073054001	glutamate--glyoxylate aminotransferase 1 [Brassica napus]	2	692.835	0.092391	0.0010624	105.1	2	15126	20114	12490	1203.9	1931.8	1488.7	14129	17881	9865.2	2115.5	2670.5	1792.7
1390	HAAPNCK	7	iodo TMT-6plex var	_HAAPNC(io)K_	GSBRNA2T00150281001	malate dehydrogenase, cytoplasmic 1-like [Brassica napus]	3	357.197	-0.75635	0.0052068	83.087	3	25445	132310		3210.9	32985		31674	132050		4077.8	39265
1391	HACIAIR	7	iodo TMT-6plex var	_HAC(io)IAIR_	GSBRNA2T00148640001	lactoylglutathione lyase family protein [Arabidopsis lyrata subsp. lyrata]	2	556.832	0.074456	0.0087335	89.903	1		7465.3			819.79			8672			1034.9
1392	HACPSTMTFAHDSPSLMHDCSSPR	24	2 iodo TMT-6plex var	_HAC(io)PSTMTFAHDSPSLMHDC(io)SSPR_	GSBRNA2T00090065001	osmotin-like protein [Brassica napus]	5	655.514	-0.11393	5.1052e-10	96.016	1	3052.9	3391.2		214.84	212.61		3878.9	3358.5		336.33	400.3
1404	HASVEQIDMCEIDK	14	iodo TMT-6plex var	_HASVEQIDMC(io)EIDK_	GSBRNA2T00033208001	spermidine synthase 1-like [Brassica rapa]	3	649.655	-0.13142	2.6787e-11	126.56	1	2047.8	1975.5	1446	596.66	694.51	465.92	2066.1	1796	1447.5	703.47	407.06	729.71
1411	HCGISHTGSFK	11	iodo TMT-6plex var	_HC(io)GISHTGSFK_	GSBRNA2T00116295001	threonine synthase 1, chloroplastic-like [Brassica oleracea var. oleracea]	3	501.596	-0.068248	1.6344e-06	133.42	1	4833.8	4702.6	3406.9	1221.8	1567.4	1014.6	4637.3	5159.7	3863	1287	1580.6	1593.2
995	HCGPCVK	7	2 iodo TMT-6plex var	_HC(io)GPC(io)VK_	GSBRNA2T00103728001	thioredoxin-like protein CDSP32, chloroplastic [Brassica oleracea var. oleracea]	3	467.933	-1.3653	0.0099117	67.741	1		32113	32993		3420.3	3461.7		25083	34663		1637.5	2313.1
1414	HCPIWYGYSGR	11	iodo TMT-6plex var	_HC(io)PIWYGYSGR_	GSBRNA2T00134366001	cellulose synthase A catalytic subunit 3 [UDP-forming]-like [Brassica napus]	3	556.615	-0.069301	0.019146	49.448	1	2397.3	1827.1		568.87	685.37		1929.6	2251.3		964.05	1148.6
1417	HCTGQYFDYWHCIDK	15	2 iodo TMT-6plex var	_HC(io)TGQYFDYWHC(io)IDK_	GSBRNA2T00059783001	cytochrome b-c1 complex subunit 6-like [Brassica rapa]	5	515.654	0.29209	4.9738e-10	118.52	1	3608.2	8352.7	6408.8	244.03	581.32	537.19	3355.6	6937.9	4873.5	293.96	376.13	507.07
1418	HCVNSISLK	9	iodo TMT-6plex var	_HC(io)VNSISLK_	GSBRNA2T00138232001	peptide methionine sulfoxide reductase B5-like isoform X1 [Brassica oleracea var. oleracea]	3	443.922	0.1599	0.022188	51.445	1		3315.7			1251.8			2409.5			1876.9
1419	HCVNSVSLK	9	iodo TMT-6plex var	_HC(io)VNSVSLK_	GSBRNA2T00131642001	peptide methionine sulfoxide reductase B5-like isoform X1 [Brassica napus]	3	439.25	-0.61855	0.00043323	107.21	1	7390.9	5388.3		1441.4	1063		6987.5	5511.3		1879	1288.2
1421	HDFIVVEFYAPWCGHCK	17	2 iodo TMT-6plex var	_HDFIVVEFYAPWC(io)GHC(io)K_	GSBRNA2T00066638001	protein disulfide isomerase-like 1-1 [Brassica napus]	5	542.683	0.11372	7.5149e-07	94.487	1	4067.8	2280.4		483.28	208.73		4477.5	3113.7		572.72	380.15
1421	HDPCVVPR	8	iodo TMT-6plex var	_HDPC(io)VVPR_	GSBRNA2T00028132001	chorismate synthase, chloroplastic-like [Brassica rapa]	3	417.899	-0.93848	0.044493	41.575	1	12325		8226.8	3209.1		2314.5	14492		9088.4	4545.9		2909.2
1434	HETCYQIALAIKDEVEDLEK	20	iodo TMT-6plex var	_HETC(io)YQIALAIKDEVEDLEK_	GSBRNA2T00143127001	---	4	669.849	0.75017	1.6008e-14	125.23	2	1940.6	1332.4		336.2	249.19		1904.6	1901.9		312.87	310.53
1437	HFGCVLCR	8	2 iodo TMT-6plex var	_HFGC(io)VLC(io)R_	GSBRNA2T00152633001	thioredoxin-like protein AAED1, chloroplastic [Brassica napus]	4	398.978	-0.56207	0.0072619	69.176	1	28342	48250	18876	1849.7	2742	999.68	23837	39745	15556	374.94	660.52	470.04
1457	HGFEHTLSWLNQWACSR	17	iodo TMT-6plex var	_HGFEHTLSWLNQWAC(io)SR_	GSBRNA2T00122300001	leucine--tRNA ligase, cytoplasmic-like [Brassica napus]	4	601.051	0.35925	3.1267e-06	87.429	1	4064	3035.9		697.55	681.29		4577.1	3789.8		1067.8	870.78
1021	HGIICTEDLIHEILTVGPHFK	21	iodo TMT-6plex var	_HGIIC(io)TEDLIHEILTVGPHFK_	GSBRNA2T00128857001	60S ribosomal protein L7-2 [Brassica napus]	5	541.1	-0.43529	6.9967e-06	71.592	1			419.75			0			373.93			0
1470	HIDCAQIYGNEK	12	iodo TMT-6plex var	_HIDC(io)AQIYGNEK_	GSBRNA2T00124902001	---	3	573.961	0.24089	0.026144	43.761	1	2314			1572.1			1803.3			1747.3
1480	HIGGCDSVTNLHR	13	iodo TMT-6plex var	_HIGGC(io)DSVTNLHR_	GSBRNA2T00080479001	glutaredoxin-C2 [Brassica napus]	4	435.231	-0.2477	0.00021177	80.17	1	3874.4	3339.8		1556.6	1295		4491.2	3382.9		1835.5	1374.3
1485	HIQGLPCR	8	iodo TMT-6plex var	_HIQGLPC(io)R_	GSBRNA2T00151844001	30S ribosomal protein S13, chloroplastic-like isoform X2 [Brassica napus]	2	626.861	0.038373	0.0020341	126.28	1	7425.7	5951	5955.7	971.69	493.08	610.79	9063.7	7400.7	6836.1	1225.9	1055.7	1238.4
1051	HLCLAIR	7	iodo TMT-6plex var	_HLC(io)LAIR_	GSBRNA2T00109443001	---	3	385.573	-1.2863	0.0043705	89.903	2	53949	45098	32362	4241.5	4599.1	2222.5	44987	39632	28194	3725.6	4872	2359.4
1496	HLDPTSCFFPQNLVSEIK	18	iodo TMT-6plex var	_HLDPTSC(io)FFPQNLVSEIK_	GSBRNA2T00052382001	pectin acetylesterase 3 [Brassica rapa]	3	802.089	0.38833	0.0029099	48.216	1	1477.3			493.28			1363.2			514.05
1061	HLSSLYDTLLEQNLCR	16	iodo TMT-6plex var	_HLSSLYDTLLEQNLC(io)R_	GSBRNA2T00150716001	26S proteasome non-ATPase regulatory subunit 11 homolog [Brassica napus]	3	745.398	-0.18059	4.9487e-12	150.05	1	2571	3540.2	4310.6	353.22	466.62	316.71	2767.8	3616.2	4430.3	322.63	521.7	631.54
1074	HPALLLVDGVSSICALDFR	19	iodo TMT-6plex var	_HPALLLVDGVSSIC(io)ALDFR_	GSBRNA2T00155026001	---	4	589.582	0.28466	1.5273e-08	95.409	1	4748.6	2863.1	2775.8	454.73	257.4	261.62	3665.6	2143.4	2139.6	470.51	315.43	485.6
1075	HPGQEVFSGSTCK	13	iodo TMT-6plex var	_HPGQEVFSGSTC(io)K_	GSBRNA2T00059649001	ATPase 2, plasma membrane-type-like [Brassica napus]	3	569.289	-0.38483	7.9514e-13	182.33	1	8133.6	5915.3	5412.7	1659.1	2550.4	1000	6895.8	6164.4	5576.9	2178.2	2880.4	1353.9
1082	HQADVCHAYQLLR	13	iodo TMT-6plex var	_HQADVC(io)HAYQLLR_	GSBRNA2T00130664001	vacuolar-processing enzyme gamma-isozyme [Brassica napus]	4	471.503	-0.95623	0.00017888	96.756	1	3643.3		2478.3	622.35		1083.9	1868.9		1359.7	731.13		1072.4
1089	HSIGCLFWLLAR	12	iodo TMT-6plex var	_HSIGC(io)LFWLLAR_	GSBRNA2T00099549001	40S ribosomal protein SA-like [Brassica napus]	3	582.334	-0.24799	1.7545e-10	181.68	2	9113.2	10943	10317	1311.1	1891.4	1760.7	15481	19009	15792	1232.7	2067.7	1925.4
1549	HSNIPAHVSPCFR	13	iodo TMT-6plex var	_HSNIPAHVSPC(io)FR_	GSBRNA2T00146079001	40S ribosomal protein S11-3-like [Brassica napus]	3	598.653	0.4253	1.1787e-06	105.03	2	5243.2	3224.8	3795.8	795.72	478.76	0	6784.1	4596.4	4998.9	1163.5	533.75	713.13
1562	HTGPGILSMANAGPNTNGSQFFICTVK	27	iodo TMT-6plex var	_HTGPGILSMANAGPNTNGSQFFIC(io)TVK_	GSBRNA2T00127069001	peptidyl-prolyl cis-trans isomerase CYP20-3, chloroplastic [Brassica oleracea var. oleracea]	4	773.647	0.1418	4.5127e-14	107.65	1	1787.4	926.09		424.52	315.51		1454.9	780.1		265.35	367
1102	HVCLQTGTK	9	iodo TMT-6plex var	_HVC(io)LQTGTK_	GSBRNA2T00154424001	3-oxo-Delta(4,5)-steroid 5-beta-reductase-like [Brassica napus]	3	439.25	-1.0163	0.0017277	87.149	1			6208			2243.2			5442.6			2800.4
1120	HWYIQSTCATSGEGLYEGLDWLSNNIAGK	29	iodo TMT-6plex var	_HWYIQSTC(io)ATSGEGLYEGLDWLSNNIAGK_	GSBRNA2T00153210001	ADP-ribosylation factor 1-like isoform X3 [Brassica napus]	4	886.436	-0.07423	4.0559e-25	146.15	1	999.47	1778.3	734.75	0	0	0	1118	1551.7	906.14	134.3	126.5	0
1595	HWYIQSTCATSGEGLYEGLDWLSNNIANK	29	iodo TMT-6plex var	_HWYIQSTC(io)ATSGEGLYEGLDWLSNNIANK_	GSBRNA2T00156835001	ADP-ribosylation factor 1 isoform X2 [Sesamum indicum]	4	900.691	0.02477	2.5475e-39	168.35	2	2178.6	1003.1	519.42	0	0	0	1969.4	1431.2	274.98	0	0	0
1123	HYAHVDCPGHADYVK	15	iodo TMT-6plex var	_HYAHVDC(io)PGHADYVK_	GSBRNA2T00151647001	elongation factor Tu, mitochondrial-like [Brassica napus]	3	681.002	-0.49336	4.3304e-11	145.69	2	5266.4	5865.6	6095.5	0	446.62	573.69	5812.5	5801	6593.5	118.04	786.69	808.99
1130	HYGTCNYFNSLYK	13	iodo TMT-6plex var	_HYGTC(io)NYFNSLYK_	GSBRNA2T00076232001	triacylglycerol lipase-like 1 [Arabidopsis thaliana]	3	646.984	-0.50105	0.00024933	92.039	1	1870.2	3057.2	2857	496.9	392.64	353.7	1165	1840.7	1512	388.1	462.38	592.83
1614	IACYVTVR	8	iodo TMT-6plex var	_IAC(io)YVTVR_	GSBRNA2T00105866001	60S ribosomal protein L11-2-like [Raphanus sativus]	3	418.579	-0.44047	0.039815	41.427	1		4213.1			3374.7			5976.6			2926.8
1616	IAEEAGACAVMALER	15	iodo TMT-6plex var	_IAEEAGAC(io)AVMALER_	GSBRNA2T00155295001	---	3	621.66	0.22884	1.7839e-05	89.506	1	3036	2576.5	2128.4	889.79	824.85	694.94	3153.8	3752.9	2363.1	1127.6	1138.6	928.86
1626	IAICIFDDVAEQCR	14	2 iodo TMT-6plex var	_IAIC(io)IFDDVAEQC(io)R_	GSBRNA2T00154276001	---	3	752.074	0.29592	1.0103e-06	102.45	1	6243	5526	2776.6	529.83	267.7	0	7341.3	6313.4	3216	404.47	381.18	240.73
1624	IALTTAEYLAYECGK	15	iodo TMT-6plex var	_IALTTAEYLAYEC(io)GK_	GSBRNA2T00050647001	V-type proton ATPase subunit B1-like [Brassica napus]	3	659.018	0.52095	1.503e-05	90.707	1	2349.1	3927.2	1453.4	511.22	1124.2	381.64	2209.1	3303.5	866.71	667.09	1335.3	441.3
1641	ICDGILNVLEAHLIPSASPAESK	23	iodo TMT-6plex var	_IC(io)DGILNVLEAHLIPSASPAESK_	GSBRNA2T00114434001	14-3-3-like protein GF14 psi isoform X1 [Brassica napus]	4	677.373	0.15383	5.0279e-05	59.07	1	1176.9	1038.1		256.59	324.06		1212.7	1321.9		326.28	476.17
1640	ICDWFLK	7	iodo TMT-6plex var	_IC(io)DWFLK_	GSBRNA2T00138165001	receptor-interacting protein [Arabidopsis thaliana]	3	418.569	-0.73829	0.025864	52.403	1		5127			1003.5			4120.1			1171.8
1153	ICHTNNCPVGVASQR	15	2 iodo TMT-6plex var	_IC(io)HTNNC(io)PVGVASQR_	GSBRNA2T00136396001	ferredoxin-dependent glutamate synthase 1, chloroplastic/mitochondrial [Brassica napus]	3	753.073	-0.53085	1.6423e-08	131.18	2	6722.6	7588.7	25783	345.69	948.52	1304.6	5430.6	6775.2	17907	573.93	1219.8	0
1644	IDCGSACVAR	10	2 iodo TMT-6plex var	_IDC(io)GSAC(io)VAR_	GSBRNA2T00103686001	gibberellin-regulated protein 1 [Brassica napus]	4	413.98	-0.58521	0.0041301	65.627	1	16606	22723	14599	999.99	1381.8	916.12	16653	21735	13638	663.45	796.34	624.76
1645	IDCPSPICNPTCPAISTDE	19	3 iodo TMT-6plex var	_IDC(io)PSPIC(io)NPTC(io)PAISTDE_	GSBRNA2T00131426001	pectin acetylesterase 7-like [Brassica napus]	4	741.637	0.11261	0.0028203	43.326	1	3976.6			708.8			3188.9			739.13
1647	IDFLSLSYCR	10	iodo TMT-6plex var	_IDFLSLSYC(io)R_	GSBRNA2T00129440001	pyruvate kinase, cytosolic isozyme-like [Brassica napus]	3	515.948	-0.64818	5.2448e-05	117.7	1	4905.7	6872.4	2995	970.6	1147	482.66	7438	10106	4940.4	1033	1295.7	594.72
1649	IDGSEIVCEGPR	12	iodo TMT-6plex var	_IDGSEIVC(io)EGPR_	GSBRNA2T00157051001	PGR5-like protein 1A, chloroplastic [Brassica napus]	2	802.419	-0.10822	0.00086234	80.69	1	3137.1			375.01			3352.6			577.19
1651	IDYCSYTVR	9	iodo TMT-6plex var	_IDYC(io)SYTVR_	GSBRNA2T00153406001	ribosomal protein S3 (chloroplast) [Brassica juncea]	3	483.585	-0.54947	0.0031364	79.148	1	4897.3	5031.9	3153.9	1258.5	1610.2	988.25	5063.8	5826	3248.9	1312.2	2201	1273.7
1162	IDYLCSHLCFLR	12	2 iodo TMT-6plex var	_IDYLC(io)SHLC(io)FLR_	GSBRNA2T00035009001	---	3	714.397	0.33818	1.4456e-06	134.56	1	25069	21808	26813	1334.4	1222	1064.9	19009	15904	19963	503.67	565.68	0
1165	IEICMLPVGDGITICR	16	2 iodo TMT-6plex var	_IEIC(io)MLPVGDGITIC(io)R_	GSBRNA2T00099957001	caffeoyl-CoA O-methyltransferase 1 [Brassica napus]	3	797.782	-0.1469	4.4409e-07	116	1	5029	10646	7484.9	442.08	856.47	797.88	8060.4	17106	11251	545.53	635.36	478.5
1663	IEIECIATL	9	iodo TMT-6plex var	_IEIEC(io)IATL_	GSBRNA2T00137347001	reactive Intermediate Deaminase A, chloroplastic-like isoform X2 [Brassica rapa]	2	667.384	0.10043	0.018544	63.419	1	2596.2			531			2058.1			504.59
1674	IFHYGSISLITEPCK	15	iodo TMT-6plex var	_IFHYGSISLITEPC(io)K_	GSBRNA2T00017186001	probable fructokinase-6, chloroplastic [Brassica napus]	3	679.706	0.07836	5.095e-07	101.97	1	2329.1	1929.8	2650.4	312.95	478.92	389.8	1707.3	1686.5	1704.6	661.69	519.08	584.53
1691	IGEGCLIGPDVAIGPGCVVESGVR	24	2 iodo TMT-6plex var	_IGEGC(io)LIGPDVAIGPGC(io)VVESGVR_	GSBRNA2T00155190001	mannose-1-phosphate guanylyltransferase 1-like [Brassica napus]	4	739.659	0.58994	2.788e-05	56.453	1	1744.8	1876.8		0	0		2281	1907.8		120.15	116.74
1725	IIVACSSAGTMKPTQNLPEGQQSR	24	iodo TMT-6plex var	_IIVAC(io)SSAGTMKPTQNLPEGQQSR_	GSBRNA2T00016696001	rhodanese-like domain-containing protein 14, chloroplastic [Brassica napus]	4	712.127	0.094372	0.0004827	49.076	1		939.21			488.58			906.77			637.87
1729	IIYCLYEHCFSTR	13	2 iodo TMT-6plex var	_IIYC(io)LYEHC(io)FSTR_	GSBRNA2T00105563001	glycine--tRNA ligase 1, mitochondrial-like [Brassica oleracea var. oleracea]	3	769.411	-0.37109	0.00022661	80.312	1	5651.3	6193.7		445.41	367.03		5992.3	6937.6		304.96	0
1209	IIYGGSVNGGNCK	13	iodo TMT-6plex var	_IIYGGSVNGGNC(io)K_	GSBRNA2T00115207001	triosephosphate isomerase, cytosolic-like [Brassica napus]	2	805.93	-0.18156	0.00070728	91.313	1			1159.1			0			1105.8			396.74
1729	IKDNPNLEDCVFR	13	iodo TMT-6plex var	_IKDNPNLEDC(io)VFR_	GSBRNA2T00064134001	peptidyl-prolyl cis-trans isomerase CYP38, chloroplastic [Brassica rapa]	3	631.335	-0.36407	0.01723	50.088	1		1876.5			740.63			1764.5			997.56
1210	IKPISGGIPHCFPQFGPGVIQQHGFGR	27	iodo TMT-6plex var	_IKPISGGIPHC(io)FPQFGPGVIQQHGFGR_	GSBRNA2T00081671001	putative glucose-6-phosphate 1-epimerase isoform X2 [Brassica rapa]	5	641.551	-0.092802	0.0011814	44.167	1			1359.8			105.96			1025.4			448.39
1739	ILGICFGHQIIAR	13	iodo TMT-6plex var	_ILGIC(io)FGHQIIAR_	GSBRNA2T00130348001	putative glutamine amidotransferase-like protein C13C5.04 [Brassica napus]	4	443.266	-0.34463	0.00025334	80.245	1	6370.7			793.14			4463.3			825.31
1755	ILYDFCFLR	9	iodo TMT-6plex var	_ILYDFC(io)FLR_	GSBRNA2T00144412001	cysteine-rich repeat secretory protein 55-like [Brassica napus]	3	506.95	-0.23955	0.0029563	80.455	1	12620	11317		1174.3	1186.8		4212.7	3608.8		1160.2	1184.7
1761	IMGGCDK	7	iodo TMT-6plex var	_IMGGC(io)DK_	GSBRNA2T00143523001	40S ribosomal protein S6-2-like [Brassica napus]	2	526.775	0.21325	0.014789	80.098	1	3593.9	6377.9		526.61	976.06		5318.3	8641		1504.5	1894.1
1762	IMILGAGPIVIGQACEFDYSGTQACK	26	2 iodo TMT-6plex var	_IMILGAGPIVIGQAC(io)EFDYSGTQAC(io)K_	GSBRNA2T00108590001	---	4	836.696	-0.20039	6.0751e-06	62.193	1		1485.6			0			1809.9			0
1766	IMTDGFNSCK	10	iodo TMT-6plex var	_IMTDGFNSC(io)K_	GSBRNA2T00073054001	glutamate--glyoxylate aminotransferase 1 [Brassica napus]	2	722.86	0.29105	9.8027e-08	164.97	2	11001	11768	10586	1815.2	1691.9	2041.9	10753	10911	10192	2052.1	2379.5	1947.3
1769	INECYTGK	8	iodo TMT-6plex var	_INEC(io)YTGK_	GSBRNA2T00156720001	carotenoid 9,10(9',10')-cleavage dioxygenase 1 [Brassica oleracea var. oleracea]	2	628.829	-0.029973	0.0221	65.278	1	4187.4			2445.6			4402.7			2608
1780	INVYYNEASCGR	12	iodo TMT-6plex var	_INVYYNEASC(io)GR_	GSBRNA2T00058778001	---	3	573.289	-0.67881	0.00018834	89.301	1	3308.6	3611	2587.6	393.05	404.8	544.66	4173.3	4010.6	2839.3	858.16	826.1	967.56
1782	INWICNPVHK	10	iodo TMT-6plex var	_INWIC(io)NPVHK_	GSBRNA2T00151094001	60S ribosomal protein L15-1-like [Brassica napus]	3	518.292	-0.10027	0.0062916	64.191	1	2059.5	2993.7	2213.3	887.56	1655.5	616.99	3081.9	3847.5	3090.2	1102.1	1721.6	814.77
1789	IPFVCGCR	8	2 iodo TMT-6plex var	_IPFVC(io)GC(io)R_	GSBRNA2T00134147001	pyridoxal 5'-phosphate synthase subunit PDX1.3-like [Brassica napus]	3	518.3	-0.50569	0.0022001	92.467	1	10194	12796	9659	1255.9	1132.2	714.72	13698	16013	12311	339.08	703.93	484.37
1788	IPLFSAAGLPHNEIAAQICR	20	iodo TMT-6plex var	_IPLFSAAGLPHNEIAAQIC(io)R_	GSBRNA2T00050647001	V-type proton ATPase subunit B1-like [Brassica napus]	4	613.344	-0.067769	2.1287e-06	77.871	2	2015.6	2665.3	1820.6	347.53	412.84	112.13	1728.3	2227.1	1526	326.5	862.55	344.67
1256	IPTTVCWGQR	10	iodo TMT-6plex var	_IPTTVC(io)WGQR_	GSBRNA2T00068476001	haloalkane dehalogenase 2-like [Brassica napus]	3	497.276	-0.67664	0.019332	50.194	1			2863.9			591.47			1708.6			1123
1802	IPVGSPFSHLEAASFMYNDCLCGK	24	2 iodo TMT-6plex var	_IPVGSPFSHLEAASFMYNDC(io)LC(io)GK_	GSBRNA2T00122348001	DNA-damage-repair/toleration protein DRT100 [Brassica oleracea var. oleracea]	5	649.733	0.45467	0.0009259	43.841	1	3094	2542.6		395.82	359.1		3344.9	2900.9		534.65	481.72
1802	IQYGTLCIR	9	iodo TMT-6plex var	_IQYGTLC(io)IR_	GSBRNA2T00114576001	phosphoglycolate phosphatase 1B, chloroplastic [Brassica napus]	3	465.938	-0.46776	0.00076002	99.442	1	9791.5	9947.4	10288	1005.3	1188.1	1071.6	7475.9	8256	8705.6	1084.2	1345.6	1566.2
1828	ISSVEEGINHCNASNFGLQGCVFTK	25	2 iodo TMT-6plex var	_ISSVEEGINHC(io)NASNFGLQGC(io)VFTK_	GSBRNA2T00012213001	NADP-dependent glyceraldehyde-3-phosphate dehydrogenase [Raphanus sativus]	5	663.343	0.13285	0.00060355	45.579	1	3119.7			142.31			3878.3			528.92
1825	ITACLDPDGWK	11	iodo TMT-6plex var	_ITAC(io)LDPDGWK_	GSBRNA2T00112939001	probable lactoylglutathione lyase, chloroplast [Brassica napus]	2	774.408	0.50661	0.013351	59.418	1		2250.8	2853.7		0	263.64		1784.9	2876		431.09	371.1
1829	ITDGALVVVDCIEGVCVQTETVLR	24	2 iodo TMT-6plex var	_ITDGALVVVDC(io)IEGVC(io)VQTETVLR_	GSBRNA2T00069636001	elongation factor 2 [Brassica napus]	4	798.445	0.51549	0.00092165	42.185	1		1655.7			0			2489.2			0
1844	ITPNQNIVLCDIK	13	iodo TMT-6plex var	_ITPNQNIVLC(io)DIK_	GSBRNA2T00057791001	sulfite reductase [ferredoxin], chloroplastic-like [Brassica napus]	3	600.68	0.34046	0.00069626	71.879	1	1405		2445.3	794.03		1105	1154.4		2164.9	928.98		1133.9
1287	ITQLTDNVYVCR	12	iodo TMT-6plex var	_ITQLTDNVYVC(io)R_	GSBRNA2T00130426001	proteasome subunit beta type-6 [Brassica napus]	3	585.32	-0.29928	1.0025e-06	144.1	1	3061.7	3704.7	3572.6	657.88	578.88	780.56	3424.6	3895.2	4352	743.5	889.62	904.58
1290	IVCENTLDAR	10	iodo TMT-6plex var	_IVC(io)ENTLDAR_	GSBRNA2T00157182001	V-type proton ATPase subunit E1 [Brassica napus]	2	731.898	-0.089127	0.00049539	113.69	1	6423.9	6202	4328.4	634.86	337.11	350.05	6381.1	5557.3	4078.9	809.46	574.76	516.28
1850	IVCTLGPASR	10	iodo TMT-6plex var	_IVC(io)TLGPASR_	GSBRNA2T00134656001	pyruvate kinase, cytosolic isozyme-like isoform X2 [Brassica napus]	3	449.266	-0.10693	0.0091467	59.418	1	6459.9	4917.3		2896	2746.1		5858.6	5428.3		3586.3	3234.6
1868	IVSVLGCILSLLNK	14	iodo TMT-6plex var	_IVSVLGC(io)ILSLLNK_	GSBRNA2T00125493001	NAD kinase 2, chloroplastic [Brassica rapa]	2	901.063	0.3428	1.8023e-08	116.98	1	1143.5			0			997.53			0
1866	IVVELIVPVACEQGMR	16	iodo TMT-6plex var	_IVVELIVPVAC(io)EQGMR_	GSBRNA2T00092231001	elongation factor Tu, chloroplastic-like [Brassica rapa]	3	695.73	-0.114	5.3183e-12	124.62	2	6791.6	4038.2	7192	880.33	872.77	1171.1	7264.2	4268.6	7351	1204.2	1042.7	1311.4
1874	IVVNCGIGDAAQNDK	15	iodo TMT-6plex var	_IVVNC(io)GIGDAAQNDK_	GSBRNA2T00153511001	50S ribosomal protein L5, chloroplastic [Brassica oleracea var. oleracea]	3	615.995	-0.24589	1.5496e-05	87.647	1	2100.2	2773.9	2137.2	616.76	612.95	182.69	2446.6	2559.5	2123	525.91	692.23	648.72
1870	IVVSSCGHDGPFGATGVK	18	iodo TMT-6plex var	_IVVSSC(io)GHDGPFGATGVK_	GSBRNA2T00072297001	thiamine thiazole synthase, chloroplastic-like [Brassica napus]	4	515.775	-0.1536	8.1717e-08	94.281	1	1846.1	698.76	1539.8	1311.9	189.46	455.49	6201.3	3292.2	5311.8	1583.6	811.74	1184.3
1309	IWAFGPETTGPNMVVDMCK	19	iodo TMT-6plex var	_IWAFGPETTGPNMVVDMC(io)K_	GSBRNA2T00069636001	elongation factor 2 [Brassica napus]	3	809.069	0.61788	1.5206e-12	131.45	1	1808	3361.7	2069.3	508.49	807.38	809.8	2560	3651.5	2935.8	836.46	1367.2	893.73
1313	IYACGELPLDA	11	iodo TMT-6plex var	_IYAC(io)GELPLDA_	GSBRNA2T00127069001	peptidyl-prolyl cis-trans isomerase CYP20-3, chloroplastic [Brassica oleracea var. oleracea]	2	747.397	0.19373	9.2498e-05	114.97	2	11792	9201.9	9085.2	397.41	815.97	598.14	10529	7820.7	8302.2	928.07	808.92	559.85
1882	IYYLSELPDFCSK	13	iodo TMT-6plex var	_IYYLSELPDFC(io)SK_	GSBRNA2T00016001001	ribosomal RNA small subunit methyltransferase J [Arabidopsis thaliana]	3	636.332	-0.14313	0.0006557	73.927	1	1779.5	1587.3		527.29	531.57		1356.5	1207.1		630.69	578.45
1884	KADDCIGPEVESLVASLPEGGVLLLENVR	29	iodo TMT-6plex var	_KADDC(io)IGPEVESLVASLPEGGVLLLENVR_	GSBRNA2T00076479001	phosphoglycerate kinase 1, chloroplastic-like [Brassica napus]	4	838.706	-0.1183	1.1136e-39	160.16	2	1168.9	1463.6	372.63	0	0	0	855.2	1268.2	266.32	370.32	114.48	0
1893	KAGGSDPLEEYCSDNPETDECR	22	2 iodo TMT-6plex var	_KAGGSDPLEEYC(io)SDNPETDEC(io)R_	GSBRNA2T00133000001	calvin cycle protein CP12-1, chloroplastic-like [Brassica napus]	5	615.491	-0.14742	2.4958e-09	90.464	2	10752	9851	5664.7	398.23	511.43	357.08	7486.9	6806	4281.1	585.39	0	451.9
1323	KAPCGEGTNTWDR	13	iodo TMT-6plex var	_KAPC(io)GEGTNTWDR_	GSBRNA2T00110197001	40S ribosomal protein S20-1-like [Brassica napus]	3	588.628	-0.14246	0.0004569	77.776	1	2093.5		2392.3	549.99		470.77	2843.2		3205.6	886.11		704.68
1904	KCQYAVR	7	iodo TMT-6plex var	_KC(io)QYAVR_	GSBRNA2T00073054001	glutamate--glyoxylate aminotransferase 1 [Brassica napus]	3	399.564	-0.7499	0.0047273	83.287	1	11144	10545	12368	1965	3408.4	4262.6	11096	14858	16785	2407.1	4721.2	6941.8
1899	KDNTFVYMCGLK	12	iodo TMT-6plex var	_KDNTFVYMC(io)GLK_	GSBRNA2T00005645001	ferredoxin--NADP reductase, leaf isozyme 1, chloroplastic-like [Brassica napus]	2	874.457	-0.20307	3.5037e-11	147.33	1	3161.7	3595.8	2972	537.72	710.3	672.87	2972.2	3528.9	3055.4	589.27	692.8	709.7
1900	KDPPVKPTCPTDTLK	15	iodo TMT-6plex var	_KDPPVKPTC(io)PTDTLK_	GSBRNA2T00138964001	14 kDa proline-rich protein DC2.15-like [Brassica napus]	3	657.038	0.365	0.0044108	53.395	1		1370.8	1123.3		380.76	272.52		1048.3	644.18		464.84	388.96
1910	KEQCLALGTR	10	iodo TMT-6plex var	_KEQC(io)LALGTR_	GSBRNA2T00018242001	photosystem I reaction center subunit II-1, chloroplastic [Brassica oleracea var. oleracea]	2	724.416	1.1468	4.9464e-05	112.45	1	23903	11156	10857	1235.4	255.37	399.89	16441	7433.8	7767	1214.7	495.67	462.75
1919	KFCFEPTSFTVK	12	iodo TMT-6plex var	_KFC(io)FEPTSFTVK_	GSBRNA2T00035359001	---	3	588.318	0.38947	7.7779e-10	143.76	2	5482.1	6361.1	7518.2	630.86	336.8	472.63	4135.7	4307.4	5639.8	907.92	548.57	438.01
1933	KIDCGSACVAR	11	2 iodo TMT-6plex var	_KIDC(io)GSAC(io)VAR_	GSBRNA2T00103686001	gibberellin-regulated protein 1 [Brassica napus]	3	594.336	0.5546	0.022255	46.068	1	11263			786.39			10790			828.31
1942	KLDVVSNEVFSNCLR	15	iodo TMT-6plex var	_KLDVVSNEVFSNC(io)LR_	GSBRNA2T00054544001	fructose-1,6-bisphosphatase, chloroplastic-like [Brassica napus]	3	684.708	0.71919	1.8013e-20	177.63	1	7116.7	4454.6	4060.2	619.57	258.83	306.24	6705.2	4384.7	3978.4	979.73	369.02	413.84
1949	KLEDIVPSSHNCDVPHVNR	19	iodo TMT-6plex var	_KLEDIVPSSHNC(io)DVPHVNR_	GSBRNA2T00142474001	eukaryotic translation initiation factor 5A-2-like isoform X1 [Brassica oleracea var. oleracea]	4	622.829	-0.72799	3.2533e-07	84.581	1	1425.4	1110.3		395.66	243.46		1332.3	1429.5		562.66	483.33
1945	KLEECVR	7	iodo TMT-6plex var	_KLEEC(io)VR_	GSBRNA2T00078527001	elongation factor 1-beta 2-like [Brassica oleracea var. oleracea]	3	402.567	-0.2912	0.0072164	76.134	1	15891	13533	14727	3956.5	2803.7	2466.4	22928	18659	22462	4462.3	4340.5	3627
1370	KLPYGFQCA	9	iodo TMT-6plex var	_KLPYGFQC(io)A_	GSBRNA2T00138964001	14 kDa proline-rich protein DC2.15-like [Brassica napus]	3	452.583	-0.94748	0.00090133	91.853	1	14261	14748	15681	992.88	1090.4	740.51	9784	10485	11738	668.88	739.95	745.69
1959	KLTCSYPGIK	10	iodo TMT-6plex var	_KLTC(io)SYPGIK_	GSBRNA2T00140086001	phosphoribulokinase, chloroplastic-like [Brassica napus]	2	719.918	-0.085455	7.4389e-05	115.33	1	6031.3	6051.8	2763	720.11	636.22	122.46	4880.8	5449.1	2072.5	913.14	772.75	268.07
1958	KMVICRAK	8	Oxidation (M),iodo TMT-6plex var	_KM(ox)VIC(io)RAK_	GSBRNA2T00051250001	18 kDa seed maturation protein-like [Brassica napus]	2	647.388	0.66719	0.026292	44.395	1		3728.3			834.74			3339.4			1111.8
1991	KTFVIASNCHPQTIEICK	18	2 iodo TMT-6plex var	_KTFVIASNC(io)HPQTIEIC(io)K_	GSBRNA2T00121192001	---	5	538.904	-0.65861	0.00010686	67.418	1	4206.2	4192		523.69	124.01		3221.2	3172.4		597.64	549.14
1393	KVFLCCDK	8	2 iodo TMT-6plex var	_KVFLC(io)C(io)DK_	GSBRNA2T00123973001	putative F-box protein At3g17560 [Brassica napus]	2	807.467	-0.407	0.011706	69.825	2	701.22	1149	1284.2	2791.2	3155.1	5163	607.46	832.98	905.62	4379.1	4772.3	8125.6
2001	KVVGCSCLVVK	11	2 iodo TMT-6plex var	_KVVGC(io)SC(io)LVVK_	GSBRNA2T00103061001	40S ribosomal protein S12-2-like [Brassica napus]	3	598.368	0.39411	0.0014536	72.34	1	3572.5	3327.7	1570.9	484.96	1151.5	520.75	5232.5	4229.2	2428	676.94	1094.4	684.9
2002	KVVIADCGQL	10	iodo TMT-6plex var	_KVVIADC(io)GQL_	GSBRNA2T00087522001	peptidyl-prolyl cis-trans isomerase-like [Brassica napus]	2	687.902	-0.46991	0.00029582	98.254	1	3771.1		2524.8	1112		951.9	4051.6		3095.8	1593.9		1325.5
1401	LACKSIPK	8	iodo TMT-6plex var	_LAC(io)KSIPK_	GSBRNA2T00086448001	---	2	594.87	-0.1442	0.047697	51.066	1			11322			830.03			9000.4			1426.5
2009	LADGLFLESCR	11	iodo TMT-6plex var	_LADGLFLESC(io)R_	GSBRNA2T00126705001	isocitrate dehydrogenase [NAD] regulatory subunit 1, mitochondrial [Brassica oleracea var.oleracea]	2	776.921	0.49962	0.010099	61.419	1	3454.1			384.74			2996.7			519.78
2007	LALCPATNNCISTSESVSDR	20	2 iodo TMT-6plex var	_LALC(io)PATNNC(io)ISTSESVSDR_	GSBRNA2T00155485001	DUF1499 family protein [Arabidopsis thaliana]	4	685.61	-0.23185	0.0021406	44.585	1		7611.5			293.76			5159.5			543.67
2015	LANIVCK	7	iodo TMT-6plex var	_LANIVC(io)K_	GSBRNA2T00085550001	40S ribosomal protein S18 [Brassica rapa]	2	545.336	0.27889	0.012682	83.614	2	3378.9	2827.3		1088.8	938.14		5400.4	3849.5		1368.2	1183.6
2025	LANPTFGDLNHLISATMSGVTCCLR	25	2 iodo TMT-6plex var	_LANPTFGDLNHLISATMSGVTC(io)C(io)LR_	GSBRNA2T00103897001	tubulin beta-4 chain-like [Brassica napus]	5	659.353	0.72937	2.102e-07	78.272	2	2903.4	1155	1769.9	0	118.42	0	3013.6	1592.3	2267.6	0	274.16	258.6
2021	LASCFLDSMATLNLPAWGYGLR	22	iodo TMT-6plex var	_LASC(io)FLDSMATLNLPAWGYGLR_	GSBRNA2T00107221001	alpha-glucan phosphorylase 2, cytosolic-like isoform X1 [Brassica napus]	3	910.143	-0.18608	2.0301e-05	66.636	1		845.03			237.61			875.18			353.33
2036	LATEELCK	8	iodo TMT-6plex var	_LATEELC(io)K_	GSBRNA2T00144298001	GDP-mannose 3,5-epimerase-like [Brassica napus]	2	618.347	0.041222	0.0003487	149.65	1	5637.3	6283.5	4548.7	938.3	916.69	378.26	5820.1	5491.9	5239.4	1215.3	1266.6	636.22
2039	LAVACER	7	iodo TMT-6plex var	_LAVAC(io)ER_	GSBRNA2T00134536001	porphobilinogen deaminase, chloroplastic-like [Brassica napus]	2	545.816	-0.088734	0.0065156	95.352	1	5407.7	5402.9	3659.6	1585.9	1669.2	693.65	7932.8	7744.1	5463.2	2073.9	1810.9	848.53
2035	LAWHSAGTFDCASR	14	iodo TMT-6plex var	_LAWHSAGTFDC(io)ASR_	GSBRNA2T00100654001	L-ascorbate peroxidase 1, cytosolic-like [Brassica napus]	2	925.962	0.3386	4.2187e-23	192.65	1	3054.1	2891.4	4141.6	355.35	383.22	312.23	3491.9	3433	5041.1	537.89	456.92	512.77
2045	LCAAAAGK	8	iodo TMT-6plex var	_LC(io)AAAAGK_	GSBRNA2T00156755001	chloroplast stem-loop binding protein of 41 kDa a, chloroplastic [Brassica oleracea var. oleracea]	2	517.305	-0.22894	0.0017326	111.04	1	13360	11886	8881.4	1533.5	1201.1	328.07	11550	9404.3	5928.2	1639.3	1284.1	838.1
2038	LCASLNINK	9	iodo TMT-6plex var	_LC(io)ASLNINK_	GSBRNA2T00136963001	protein THYLAKOID FORMATION 1, chloroplastic-like [Brassica napus]	2	652.882	1.0333	0.0003052	119.21	1	2292.5	3196.3	2267.8	447.27	584.16	353.76	2466.4	2742.9	1920.8	645.7	704.85	745.57
1430	LCDLCNITLNK	11	2 iodo TMT-6plex var	_LC(io)DLC(io)NITLNK_	GSBRNA2T00084232001	serine hydroxymethyltransferase 4 [Brassica oleracea var. oleracea]	3	636.699	-0.74127	0.00039723	86.463	1	4859.6	2943.2	3964.1	1838.2	2727.5	537.82	6110.6	3991.6	5662.8	2127.1	2192.5	626.19
2048	LCDQISDAILDACLEQDPESK	21	2 iodo TMT-6plex var	_LC(io)DQISDAILDAC(io)LEQDPESK_	GSBRNA2T00137491001	S-adenosylmethionine synthase 2 [Brassica napus]	3	988.84	-0.97133	1.7255e-15	122.64	1	4863.9	4971.8	3377.1	230.94	485.43	290.5	6020.8	5344.7	3985.3	365.05	0	0
1434	LCDQISDAVLDACLEQDPDSK	21	2 iodo TMT-6plex var	_LC(io)DQISDAVLDAC(io)LEQDPDSK_	GSBRNA2T00112216001	---	3	979.496	-0.88112	1.6635e-16	148.01	1	4435.6	6842.6	3821.6	378.16	794.01	349.67	6042.4	7965	5090.2	276.68	545.57	0
2044	LCDQVSDAILDACLEQDPESK	21	2 iodo TMT-6plex var	_LC(io)DQVSDAILDAC(io)LEQDPESK_	GSBRNA2T00053936001	S-adenosylmethionine synthase 3 [Brassica napus]	3	984.168	0.014255	6.2671e-42	181.87	1	9206.5	6359.5	10028	475.69	804.01	927.67	13681	8536.1	14073	113.75	0	100.25
2046	LCEAECEK	8	2 iodo TMT-6plex var	_LC(io)EAEC(io)EK_	GSBRNA2T00045118001	peptidyl-prolyl cis-trans isomerase FKBP16-3, chloroplastic-like [Brassica rapa]	3	528.283	0.054697	8.602e-05	149.82	1	17150	18427	16467	685.79	1002.9	706.17	12998	12339	10747	100.31	850.62	717.26
2057	LCIGPCTTR	9	2 iodo TMT-6plex var	_LC(io)IGPC(io)TTR_	GSBRNA2T00133724001	threonine--tRNA ligase, mitochondrial-like [Brassica napus]	4	406.238	-0.84405	0.02828	44.882	1	8782.1			1871.8			10938			1542
2059	LCLLLNVIDPK	11	iodo TMT-6plex var	_LC(io)LLLNVIDPK_	GSBRNA2T00107809001	magnesium-chelatase subunit ChlI-1, chloroplastic [Brassica napus]	3	523.992	-0.13899	5.1895e-06	118.9	1	1834.4	1248		512.51	472.85		2636.2	2152.9		1003.8	646.44
2049	LCNMDIISQVQQVICFAFHDSR	22	2 iodo TMT-6plex var	_LC(io)NMDIISQVQQVIC(io)FAFHDSR_	GSBRNA2T00002240001	cysteine sulfinate desulfinase/cysteine desulfurase and related enzymes [Zea mays]	5	645.941	0.12647	3.6115e-12	100.76	1	4013.7	3150	563.3	0	0	0	3892.3	2171.5	448.46	241.75	123.11	0
2061	LDISCFADIEDDQDFCR	17	2 iodo TMT-6plex var	_LDISC(io)FADIEDDQDFC(io)R_	GSBRNA2T00048790001	cystine lyase CORI3-like [Brassica napus]	4	666.577	0.7187	6.1138e-19	141.86	1	9592.6	14232	9664	412.34	424.02	276.42	4382.5	6248	4198.2	443.61	367.51	503.24
1454	LDTDILFGQNGGCK	14	iodo TMT-6plex var	_LDTDILFGQNGGC(io)K_	GSBRNA2T00114576001	phosphoglycolate phosphatase 1B, chloroplastic [Brassica napus]	3	603.984	-0.30191	1.2685e-08	136.7	1	2480.9	1857.8	1359.1	0	1676.8	1457.9	1954.7	1660.3	1435.2	460.07	1950.3	1368.7
2083	LDVVSNEVFSNCLR	14	iodo TMT-6plex var	_LDVVSNEVFSNC(io)LR_	GSBRNA2T00054544001	fructose-1,6-bisphosphatase, chloroplastic-like [Brassica napus]	2	962.512	0.56607	6.9316e-05	85.909	1	3329.7			119.16			2855.5			287.32
2068	LDYCSNLK	8	iodo TMT-6plex var	_LDYC(io)SNLK_	GSBRNA2T00106127001	trifunctional UDP-glucose 4,6-dehydratase/UDP-4-keto-6-deoxy-D-glucose 3,5-epimerase/UDP-4-keto-L-rhamnose-reductase RHM3-like [Brassica napus]	2	642.845	0.36535	0.017687	70.747	1		2150			2221.8			3346.4			3046.7
1456	LECPAIGK	8	iodo TMT-6plex var	_LEC(io)PAIGK_	GSBRNA2T00048956001	heat shock 70 kDa protein 6, chloroplastic-like [Brassica rapa]	2	580.339	-0.87887	0.003281	113.41	1	2278	2000.5	2530.3	1367.7	938.32	819.16	1754	2094.7	2405.1	1633.7	1557.2	1188.2
2085	LECSSEVCTATER	13	2 iodo TMT-6plex var	_LEC(io)SSEVC(io)TATER_	GSBRNA2T00086344001	B-cell receptor-associated 31-like protein [Arabidopsis thaliana]	3	696.027	0.47579	0.011565	48.585	1	7166.1			704.5			6907.4			801.67
2073	LEGRPPSCR	9	iodo TMT-6plex var	_LEGRPPSC(io)R_	GSBRNA2T00112445001	zeaxanthin epoxidase, chloroplastic [Brassica napus]	3	448.585	0.35251	0.016465	60.828	1		7341.5			1689.8			6204.7			2197.1
2089	LEIMEPCCSVK	11	2 iodo TMT-6plex var	_LEIMEPC(io)C(io)SVK_	GSBRNA2T00002261001	cysteine synthase, chloroplastic/chromoplastic-like [Brassica napus]	2	955.519	-0.19686	6.0755e-05	102.53	1	9982.3	8030.9	7676.2	626.89	266.78	253.7	8494.1	6465.8	6282.1	225.76	258.31	118
1461	LELELAEVEMPGLMACR	17	iodo TMT-6plex var	_LELELAEVEMPGLMAC(io)R_	GSBRNA2T00025157001	adenosylhomocysteinase 1-like isoform X2 [Brassica napus]	3	745.058	0.062865	7.7824e-13	142.54	1	3010.8	5968.1	3841.3	962.11	1719.8	1451.3	3851.2	7571.3	5442.8	1933.8	2556.7	2137.4
2096	LEMMEPCSSVK	11	iodo TMT-6plex var	_LEMMEPC(io)SSVK_	GSBRNA2T00075360001	cysteine synthase-like [Brassica napus]	2	791.896	-0.61351	2.7791e-05	110.08	1	3470.3	2093.2	1575.3	1325	526.07	387.71	3796.5	2038.2	1184.9	1176.1	697.29	569.18
2101	LEQYIYCSSAGVYLK	15	iodo TMT-6plex var	_LEQYIYC(io)SSAGVYLK_	GSBRNA2T00156179001	chloroplast stem-loop binding protein of 41 kDa b, chloroplastic isoform X1 [Brassica napus]	2	1033.55	-0.16356	8.203e-15	153.92	1	5222.5	7596.6	6116.8	321.6	350.39	289.94	4823.1	6457.6	5944.3	376.11	539.68	0
1470	LEVVECDLEK	10	iodo TMT-6plex var	_LEVVEC(io)DLEK_	GSBRNA2T00154010001	protein TIC 62, chloroplastic-like isoform X2 [Brassica napus]	2	753.408	-0.21156	0.043226	53.237	1			1572.3			301.62			1029.9			545.78
2118	LGAAICWENR	10	iodo TMT-6plex var	_LGAAIC(io)WENR_	GSBRNA2T00114885001	nitrilase 2-like [Brassica oleracea var. oleracea]	2	731.395	0.33834	8.9651e-05	118.71	1	4549.6			1254.4			3940.9			1600.9
1482	LGACVDLLGGLVK	13	iodo TMT-6plex var	_LGAC(io)VDLLGGLVK_	GSBRNA2T00135010001	36.4 kDa proline-rich protein [Brassica oleracea var. oleracea]	2	793.979	-0.26404	5.7633e-06	121.68	1	1918.7		2676.2	0		190.82	1703.5		1968.4	253.99		398.08
1485	LGDCPFCQR	9	2 iodo TMT-6plex var	_LGDC(io)PFC(io)QR_	GSBRNA2T00143192001	---	4	424.981	-1.6708	0.0066227	64.711	1	20047	12698	15694	1795.1	1046.9	1191	14603	9649.2	11941	1570.1	1051.4	1019.8
2123	LHSCTFK	7	iodo TMT-6plex var	_LHSC(io)TFK_	GSBRNA2T00078913001	60S ribosomal protein L31-3-like [Brassica rapa]	3	388.885	-0.24438	0.035775	45.952	1		6023.1			1607.2			9306.6			2840.7
2139	LIDIPVSNCLNSNISK	16	iodo TMT-6plex var	_LIDIPVSNC(io)LNSNISK_	GSBRNA2T00110776001	glucose-1-phosphate adenylyltransferase small subunit, chloroplastic-like [Brassica napus]	3	687.052	-0.15737	0.0003868	67.136	1	1519.5			198.57			1466.8			515.5
2141	LIDSIISHGSFLTNCLVEHSIVGIR	25	iodo TMT-6plex var	_LIDSIISHGSFLTNC(io)LVEHSIVGIR_	GSBRNA2T00154330001	glucose-1-phosphate adenylyltransferase large subunit 1, chloroplastic [Brassica rapa]	4	763.926	-0.10808	2.318e-09	85.805	1	1090.8			132.9			928.02			290.42
2146	LIGPNCPGIIKPGECK	16	2 iodo TMT-6plex var	_LIGPNC(io)PGIIKPGEC(io)K_	GSBRNA2T00071654001	succinyl-CoA ligase [ADP-forming] subunit alpha-1, mitochondrial-like [Brassica napus]	3	766.446	-0.34083	6.0618e-05	77.324	2	7427.4	6026.5	6399.4	1200.8	953.1	793.8	6729.1	5592.6	5968.8	1061.2	992.76	1122.5
1519	LLACISSR	8	iodo TMT-6plex var	_LLAC(io)ISSR_	GSBRNA2T00154244001	40S ribosomal protein S8-1-like [Brassica napus]	3	397.908	-1.785	0.0013849	104.44	1	4153.5	11235	11479	676.72	1960.3	1547.9	6907.1	18105	19196	1192.8	1923.4	1551.9
2173	LLECGEISQQDIDR	14	iodo TMT-6plex var	_LLEC(io)GEISQQDIDR_	GSBRNA2T00070910001	2-oxoglutarate dehydrogenase, mitochondrial-like [Brassica napus]	3	650.005	0.26924	0.0062331	53.3	1	1544.6			507.28			1330.9			818.89
2164	LLETICK	7	iodo TMT-6plex var	_LLETIC(io)K_	GSBRNA2T00021804001	---	3	383.569	-0.73626	0.017721	60.39	1	10656	9491.9	7587.8	1784.5	2378.6	1304.8	7883.8	8141.9	5718.9	2941.7	2794.1	1755.8
1525	LLFEALQYSHVCK	13	iodo TMT-6plex var	_LLFEALQYSHVC(io)K_	GSBRNA2T00037141001	sedoheptulose-1,7-bisphosphatase, chloroplastic-like [Brassica napus]	2	940.519	-0.13219	7.238e-08	138.02	1	5106.1	4580	3583.9	292.17	125.4	231.1	4560.7	4389.3	3085.6	0	318.24	304.83
1529	LLICGGSAYPR	11	iodo TMT-6plex var	_LLIC(io)GGSAYPR_	GSBRNA2T00084232001	serine hydroxymethyltransferase 4 [Brassica oleracea var. oleracea]	3	493.617	-0.96924	0.00051864	87.184	1	4574	3285.3	5095.3	795.73	1129.5	889.81	6505.2	4065.7	7730.1	1424.6	1474.8	1159.3
2182	LLLVTEGPEGCR	12	iodo TMT-6plex var	_LLLVTEGPEGC(io)R_	GSBRNA2T00017186001	probable fructokinase-6, chloroplastic [Brassica napus]	3	539.306	0.058401	1.9234e-06	105.2	1		5085			558.01			4345.5			997.77
2189	LLYECAPMSFIVEQAGGK	18	iodo TMT-6plex var	_LLYEC(io)APMSFIVEQAGGK_	GSBRNA2T00054544001	fructose-1,6-bisphosphatase, chloroplastic-like [Brassica napus]	3	762.401	-0.15472	1.0833e-07	94.203	2	2719.1	1999.9	1045.1	397	674.45	255.32	2761.8	1868.4	945.92	711.53	880.43	336.58
2190	LMCPGCNK	8	2 iodo TMT-6plex var	_LMC(io)PGC(io)NK_	GSBRNA2T00101634001	glutathione S-transferase F8, chloroplastic-like [Brassica oleracea var. oleracea]	3	508.614	-0.12847	0.00060899	116.3	2		17219	5861.9		2728	1120.9		17145	6851.1		3784	895.25
2212	LNEPQVCVSTTNR	13	iodo TMT-6plex var	_LNEPQVC(io)VSTTNR_	GSBRNA2T00077191001	3-isopropylmalate dehydratase large subunit-like [Brassica napus]	3	597.319	0.063776	0.00010779	86.944	1	2874.3	3113.2	1784.5	1435.5	1434.4	1035.6	3464.3	3885.3	2177.2	1675.4	1557.8	938.12
2207	LNLASFVTTWMEPECDK	17	iodo TMT-6plex var	_LNLASFVTTWMEPEC(io)DK_	GSBRNA2T00094857001	glutamate decarboxylase 1-like [Brassica napus]	3	771.72	-0.38069	5.599e-05	75.911	1		804.04			341.79			679.16			561.84
2223	LPCLPGELPTYNDWENHLTTIFPEVR	26	iodo TMT-6plex var	_LPC(io)LPGELPTYNDWENHLTTIFPEVR_	GSBRNA2T00072672001	glutamate--cysteine ligase, chloroplastic [Brassica napus]	4	846.688	0.93869	6.5076e-06	61.612	1		505.44	283.36		89.661	0		435.37	123		0	0
1565	LPDLNCTTIESAMR	14	iodo TMT-6plex var	_LPDLNC(io)TTIESAMR_	GSBRNA2T00139919001	50S ribosomal protein L11, chloroplastic [Raphanus sativus]	3	631.664	0.14273	0.0043193	57.288	1			2526.9			1290.6			2771.7			1333.9
2228	LPENVSLEEGAMCEPLSVGVHACR	24	2 iodo TMT-6plex var	_LPENVSLEEGAMC(io)EPLSVGVHAC(io)R_	GSBRNA2T00110231001	sorbitol dehydrogenase [Raphanus sativus]	5	640.535	-0.012133	2.8439e-18	116.74	1		5180.3			0			4056.6			252.15
2231	LPGFHCCVGSGGEK	14	2 iodo TMT-6plex var	_LPGFHC(io)C(io)VGSGGEK_	GSBRNA2T00071341001	probable monodehydroascorbate reductase, cytoplasmic isoform 3 [Brassica napus]	4	513.025	0.096906	0.0004238	72.321	1		4523.4	5164.8		676.89	397.71		4404.9	5392.2		735.05	565.19
2232	LPGFHTCVGGGGER	14	iodo TMT-6plex var	_LPGFHTC(io)VGGGGER_	GSBRNA2T00056453001	monodehydroascorbate reductase, chloroplastic [Brassica oleracea var. oleracea]	3	572.633	0.026546	0.015908	45.825	1		5595.5			1853.9			4494.5			2013.1
2236	LPLFGCTDSAQVLK	14	iodo TMT-6plex var	_LPLFGC(io)TDSAQVLK_	GSBRNA2T00114447001	ribulose bisphosphate carboxylase small chain, chloroplastic [Brassica napus]	2	911.011	0.14742	5.8222e-19	168	5	12547	28537	21428	903.18	1015.9	1469.5	10858	20285	18036	1618.2	2747	2497.9
2253	LPSACVGDMVMATVK	15	iodo TMT-6plex var	_LPSAC(io)VGDMVMATVK_	GSBRNA2T00153739001	60S ribosomal protein L23 [Brassica napus]	3	617.663	0.17551	0.0089787	48.216	1	1505.5			352.64			1473.9			549.78
1581	LPYGFQCA	8	iodo TMT-6plex var	_LPYGFQC(io)A_	GSBRNA2T00138964001	14 kDa proline-rich protein DC2.15-like [Brassica napus]	2	614.323	-0.64856	0.003586	119.57	1		12088	8106.2		1025.7	410.52		10388	6816.3		1552.8	471.61
2252	LQCQTCK	7	2 iodo TMT-6plex var	_LQC(io)QTC(io)K_	GSBRNA2T00150826001	60S ribosomal protein L36a-like [Brassica napus]	2	741.42	0.5695	0.030161	51.346	1	6692.5	4921.8		520.16	574.01		11103	8474.2		367.99	241.45
2260	LQSGGLSCK	9	iodo TMT-6plex var	_LQSGGLSC(io)K_	GSBRNA2T00136679001	nuclear protein [Arabidopsis thaliana]	2	611.345	0.050252	0.004963	81.771	1	3410	4216.3	14921	621.38	630.19	2589.1	3674.8	3753.6	12164	544.14	767.8	3180.1
1588	LRYSCCISNR	10	Acetyl (Protein N-term),iodo TMT-6plex var	_(ac)LRYSC(io)CISNR_	GSBRNA2T00063298001	---	2	793.411	-0.36661	0.017843	47.097	1			990.59			335.72			604.56			366.64
2273	LSEMTCK	7	iodo TMT-6plex var	_LSEMTC(io)K_	GSBRNA2T00127632001	proteasome subunit alpha type-3-like [Brassica napus]	2	570.801	0.31301	0.0063287	96.285	1	4546.2	3192		2031.2	1105.9		5012	3388.2		2799.6	1791.3
2278	LSIPAENFPFCTIEPNEAR	19	iodo TMT-6plex var	_LSIPAENFPFC(io)TIEPNEAR_	GSBRNA2T00128504001	obg-like ATPase 1 [Brassica napus]	3	826.428	0.24436	0.0016944	50.358	1		1425.7			111.29			1435.6			362.47
2288	LSNPSFGDLNHLISATMSGVTCCLR	25	2 iodo TMT-6plex var	_LSNPSFGDLNHLISATMSGVTC(io)C(io)LR_	GSBRNA2T00084227001	tubulin beta-4 chain [Brassica napus]	5	659.749	0.8115	9.3306e-06	63.979	1	1894.4	1647.8	1826	0	0	0	2120.8	2005.2	2315.1	0	0	0
1605	LSSALSAASSACDHIR	16	iodo TMT-6plex var	_LSSALSAASSAC(io)DHIR_	GSBRNA2T00076925001	---	3	640.005	-0.47817	1.3807e-08	124.25	1	2503	3511.9	2887.8	254.07	210.93	210.02	2696.7	3588.6	3300.7	460.16	469.66	588.78
1607	LSVEVPAIVCEDCYQR	16	2 iodo TMT-6plex var	_LSVEVPAIVC(io)EDC(io)YQR_	GSBRNA2T00122736001	trigger factor-like protein TIG, Chloroplastic isoform X2 [Brassica napus]	3	828.111	0.21666	4.7558e-05	79.652	1	2270	2588.7	2638.4	0	212.62	0	3241.3	3652.9	3067.5	0	362.3	254.03
1608	LSVEVPAVVCEDCYQR	16	2 iodo TMT-6plex var	_LSVEVPAVVC(io)EDC(io)YQR_	GSBRNA2T00013010001	trigger factor-like protein TIG, Chloroplastic [Brassica napus]	3	823.44	-0.25895	7.5343e-05	76.358	1	2398		2555.8	0		247.17	2451.1		2732.9	233.99		0
1611	LTAADVFMTVGCK	13	iodo TMT-6plex var	_LTAADVFMTVGC(io)K_	GSBRNA2T00048790001	cystine lyase CORI3-like [Brassica napus]	3	562.304	-0.85986	0.00043179	83.204	1	1314.2	1490.3	1820	728.09	846.19	677.73	874.12	933.72	856.29	713.69	799.28	618.64
1613	LTCSYPGIK	9	iodo TMT-6plex var	_LTC(io)SYPGIK_	GSBRNA2T00025724001	---	2	655.871	-0.69554	0.0014798	122.33	2	9039.5	11941	9377	1146.7	1172.9	900.86	7408.1	8741.2	7101.4	1681	1761.7	1174.5
2310	LTLADALVYACNQGVDK	17	iodo TMT-6plex var	_LTLADALVYAC(io)NQGVDK_	GSBRNA2T00130384001	leucine aminopeptidase 3, chloroplastic [Brassica oleracea var. oleracea]	2	1062.07	-0.68247	1.6358e-06	94.007	1	1434.3	2011.5	1642.5	745.59	798.93	0	1409.3	1455.3	1219.1	750.06	762.9	425.74
2311	LTQDGCIVCPATDSTFDLR	19	2 iodo TMT-6plex var	_LTQDGC(io)IVC(io)PATDSTFDLR_	GSBRNA2T00102478001	Rieske (2Fe-2S) domain-containing protein [Arabidopsis thaliana]	3	905.14	0.41857	7.6127e-06	73.448	1	7083.9	8783.5	8959.3	476.07	384.63	563.84	7831.8	8229.3	8548.9	0	0	105.43
1627	LTTPSFGDLNHLISATMSGVTCCLR	25	2 iodo TMT-6plex var	_LTTPSFGDLNHLISATMSGVTC(io)C(io)LR_	GSBRNA2T00135723001	---	5	659.953	0.24252	0.0024962	41.446	1			1082.3			122.52			832.34			0
2326	LVCTLLPEEEQVAAAVSA	18	iodo TMT-6plex var	_LVC(io)TLLPEEEQVAAAVSA_	GSBRNA2T00121192001	---	2	1086.59	-0.64637	0.012328	40.493	1	916.52			267.81			736.59			126.09
2329	LVFAICEGR	9	iodo TMT-6plex var	_LVFAIC(io)EGR_	GSBRNA2T00015395001	ribosomal protein S2 (chloroplast) [Eutrema halophilum]	3	446.258	-0.66239	0.0051782	70.908	1	16501	14360		1984.8	1815.4		18916	15960		1826.5	2119.4
1635	LVGDVDYAEACK	12	iodo TMT-6plex var	_LVGDVDYAEAC(io)K_	GSBRNA2T00074323001	bifunctional protein FolD 2 [Brassica napus]	2	806.416	-0.32264	0.026628	54.343	1			1930.3			308.24			2427.1			207.63
2326	LVGYCEER	8	iodo TMT-6plex var	_LVGYC(io)EER_	GSBRNA2T00037129001	putative serine/threonine-protein kinase-like protein CCR3 [Brassica napus]	2	649.342	0.40102	0.026659	64.207	1	2652.9	1480.4	863.72	5910.5	4561.1	3618.6	2120	1328.6	749.25	5872.9	4079.1	3136.8
1650	LVVLDMYTQWCGPCK	15	2 iodo TMT-6plex var	_LVVLDMYTQWC(io)GPC(io)K_	GSBRNA2T00094000001	thioredoxin F2, chloroplastic-like [Brassica napus]	3	805.431	-0.39072	8.8254e-05	84.753	1	5091.5	8288.7	7328.4	248.41	522.57	614.36	4133.7	7373.8	6296.1	273.45	586.58	254.93
1653	LVVSTSCSLLHTAVDLVNETK	21	iodo TMT-6plex var	_LVVSTSC(io)SLLHTAVDLVNETK_	GSBRNA2T00140666001	---	3	853.474	0.48862	3.4138e-29	191.64	1	1634.5	2545.1	1774.9	484.93	266.04	0	2220.7	2870.7	2157.8	420.59	466.84	290.6
2353	LWNTLGECK	9	iodo TMT-6plex var	_LWNTLGEC(io)K_	GSBRNA2T00153908001	receptor for activated C kinase 1C-like [Brassica napus]	2	696.879	-0.18061	8.8287e-05	130.66	1	3621	4694.2	4655.6	660.18	900.92	884.02	5962.5	5540.1	7131.9	1263	1033.7	1205.9
2361	LYGLGPVCK	9	iodo TMT-6plex var	_LYGLGPVC(io)K_	GSBRNA2T00078941001	flavone 3'-O-methyltransferase 1-like [Brassica napus]	3	426.92	-0.58108	0.02791	47.603	1	6066.6	5802.9	4722.7	1124.1	1496.2	1020.1	8097.1	7197.7	6420.3	1762.7	1845	1215.6
2366	LYSIASSALGDLGNSETVSLCVK	23	iodo TMT-6plex var	_LYSIASSALGDLGNSETVSLC(io)VK_	GSBRNA2T00076633001	ferredoxin--NADP reductase, leaf isozyme 2, chloroplastic [Brassica napus]	3	886.14	-0.2126	6.941e-20	128.01	1		1398.7			0			1296.3			109.04
2375	LYTSYGCPYAQR	12	iodo TMT-6plex var	_LYTSYGC(io)PYAQR_	GSBRNA2T00119583001	glutathione S-transferase L3 [Brassica rapa]	2	875.943	-0.52253	8.2591e-15	177.44	1	3492.1	2517.8	2701.3	5404.7	4320.4	3848.6	1251.8	1421.4	1272.7	2589.4	2672.6	1980.4
2371	LYVPVALQLLLTCGK	15	iodo TMT-6plex var	_LYVPVALQLLLTC(io)GK_	GSBRNA2T00135010001	36.4 kDa proline-rich protein [Brassica oleracea var. oleracea]	2	980.597	-0.54121	7.7108e-15	140.31	1	6464.6	5187.6	5209.7	490.24	160.34	258.43	6630	5401.3	5373.4	1000.9	364.12	456.91
2387	MCAEYENCK	9	2 iodo TMT-6plex var	_MC(io)AEYENC(io)K_	GSBRNA2T00060762001	chaperonin 60 subunit beta 3, chloroplastic-like [Brassica oleracea var. oleracea]	3	583.623	-0.063695	0.0013187	88.495	1	3937.2		5511.7	215.12		1172.3	5272		6959.7	482.16		1358.8
2385	MCCLFINDLDAGAGR	15	2 iodo TMT-6plex var	_MC(io)C(io)LFINDLDAGAGR_	GSBRNA2T00155196001	---	3	753.06	-0.11619	1.9336e-33	218.68	4	64131	100190	63254	5005.4	8096.8	4749.8	65139	98906	64462	129.83	607.04	583.01
2399	MDGSEIVCEGPR	12	iodo TMT-6plex var	_MDGSEIVC(io)EGPR_	GSBRNA2T00072712001	PGR5-like protein 1A, chloroplastic [Brassica napus]	2	811.397	-0.25758	0.00016127	94.402	1	4305.8	3282.8		1181.4	1046.2		2402.9	2279.5		987.3	743.2
2401	METVGSETEAYAIADTISYCK	21	iodo TMT-6plex var	_METVGSETEAYAIADTISYC(io)K_	GSBRNA2T00083635001	ATP-dependent Clp protease proteolytic subunit-related protein 1, chloroplastic-like [Brassica napus]	3	871.087	-0.060736	2.8527e-15	117.37	1		2538.2	848.61		583.34	0		2825	923.01		654.97	321.65
2406	MEVPYCIVK	9	iodo TMT-6plex var	_MEVPYC(io)IVK_	GSBRNA2T00051205001	60S ribosomal protein L7a-1 [Brassica rapa]	2	705.888	0.14496	0.028808	56.432	1	4813.3			1196.5			3729.7			1306.9
1694	MHWTGCPNTCGQVQVADIGFMGCLTR	26	3 iodo TMT-6plex var	_MHWTGC(io)PNTC(io)GQVQVADIGFMGC(io)LTR_	GSBRNA2T00088147001	ferredoxin--nitrite reductase, chloroplastic-like [Brassica napus]	5	763.391	-0.72083	2.822e-09	79.177	1	5765.4	6866.2	9166.6	307.53	636.5	457.01	5907.1	6473.7	8970.6	0	182.61	363.33
2416	MLAVLEQNILWVNPDCGLK	19	iodo TMT-6plex var	_MLAVLEQNILWVNPDC(io)GLK_	GSBRNA2T00143127001	---	3	829.122	0.41536	3.8632e-07	85.563	1	1358.7	1658.9	1888.9	293.71	277.14	262.03	1904.1	2846.9	2376.6	317.41	484.37	399.65
2417	MLDFDFLCGR	10	iodo TMT-6plex var	_MLDFDFLC(io)GR_	GSBRNA2T00109513001	ATP-citrate synthase beta chain protein 2 [Brassica oleracea var. oleracea]	3	515.93	0.37641	0.00095399	85.355	1	5782.7		2229.5	2198.7		712.14	7299.6		2582.4	2916.3		956.41
2421	MLSCAGADR	9	iodo TMT-6plex var	_MLSC(io)AGADR_	GSBRNA2T00066548001	60S ribosomal protein L10-3-like [Brassica napus]	2	626.821	0.0081325	0.010823	70.816	1	5223.5	6753.8		1560	2242.6		7802.8	9974.6		2668	3596.1
2424	MLSIMCVCVLK	11	Acetyl (Protein N-term),iodo TMT-6plex var	_(ac)MLSIMC(io)VCVLK_	GSBRNA2T00006692001	---	2	805.939	0.08435	0.02541	50.353	1	4265.8			419.64			3845.6			877.53
2440	MRFQRACHR	9	Oxidation (M),iodo TMT-6plex var	_M(ox)RFQRAC(io)HR_	GSBRNA2T00038155001	probable glutamyl endopeptidase, chloroplastic isoform X1 [Brassica oleracea var. oleracea]	2	775.411	0.24066	0.026457	42.287	1		917.1			490.49			730.95			370.43
1716	MSIASFYNPGSDAEISPASSLACK	24	iodo TMT-6plex var	_MSIASFYNPGSDAEISPASSLAC(io)K_	GSBRNA2T00070630001	1-aminocyclopropane-1-carboxylate oxidase [Brassica napus]	3	925.789	-0.17119	5.6518e-06	61.963	1			1010			0			879.43			127.73
2448	MSVEFDNCK	9	iodo TMT-6plex var	_MSVEFDNC(io)K_	GSBRNA2T00125571001	ruBisCO large subunit-binding protein subunit beta, chloroplastic-like [Brassica napus]	2	701.339	0.7831	3.6331e-08	172.23	1	5664.2	3549	2634.8	1383.2	940.59	410.12	8077.4	6136.9	3522.7	1750.2	1597.8	932.63
1719	MTAECGDNVQIVGDDLLVTNPK	22	iodo TMT-6plex var	_MTAEC(io)GDNVQIVGDDLLVTNPK_	GSBRNA2T00141806001	bifunctional enolase 2/transcriptional activator-like isoform X2 [Brassica napus]	3	887.786	0.19837	4.1099e-06	70.699	2			1791.8			365.63			1888.7			290.07
2452	MTTECGDSVQIVGDDLLVTNPK	22	iodo TMT-6plex var	_MTTEC(io)GDSVQIVGDDLLVTNPK_	GSBRNA2T00048341001	bifunctional enolase 2/transcriptional activator [Brassica napus]	3	888.786	-0.071169	1.412e-06	74.214	1		1123.6			262.55			863.75			491.72
1726	MWCSFIR	7	iodo TMT-6plex var	_MWC(io)SFIR_	GSBRNA2T00105663001	putative F-box protein At1g32660 [Brassica rapa]	2	636.333	0.17861	0.015816	84.359	1			349.93			305.72			0			230.1
2464	NAGQITCLPGQRPCR	15	2 iodo TMT-6plex var	_NAGQITC(io)LPGQRPC(io)R_	GSBRNA2T00150758001	GDSL esterase/lipase At1g29670 [Brassica rapa]	4	568.819	-0.043096	1.1257e-06	96.464	2	3494.6	7260.8	3616	121.12	560.06	0	2920.5	6164.3	3189	0	528.28	0
2469	NATWTLSNFCR	11	iodo TMT-6plex var	_NATWTLSNFC(io)R_	GSBRNA2T00056516001	importin subunit alpha-2-like [Brassica napus]	3	547.95	-0.027272	0.0070388	58.476	1		3125.9	4359		332.76	711.22		3351.2	5665.9		751.59	911.98
2474	NCAPIMVR	8	iodo TMT-6plex var	_NC(io)APIMVR_	GSBRNA2T00100654001	L-ascorbate peroxidase 1, cytosolic-like [Brassica napus]	2	616.844	-0.36009	0.002326	107.19	1	8329.6	6375.9	7780	1353.9	3668	1203.4	10177	7649.3	9760.7	1923.1	3481.4	1282.9
2475	NCDPNGPLMLYVSK	14	iodo TMT-6plex var	_NC(io)DPNGPLMLYVSK_	GSBRNA2T00069636001	elongation factor 2 [Brassica napus]	3	627.325	-0.072425	5.4212e-06	96.673	2	4097.6	3427.3		1150.6	776.82		4986.2	4528.3		1557.5	1379.2
2476	NCEACNLK	8	2 iodo TMT-6plex var	_NC(io)EAC(io)NLK_	GSBRNA2T00005689001	autophagy-related protein 101 [Brassica rapa]	2	776.921	0.13525	0.041964	47.574	1	6339			230.32			6376.8			0
2473	NCNVGLLAYSPLGGGSLSGK	20	iodo TMT-6plex var	_NC(io)NVGLLAYSPLGGGSLSGK_	GSBRNA2T00150280001	protein tas [Brassica napus]	3	746.07	0.26944	0.0034405	41.615	1		1180.7			613.3			855.02			499.85
2478	NCNYQMER	8	iodo TMT-6plex var	_NC(io)NYQMER_	GSBRNA2T00099549001	40S ribosomal protein SA-like [Brassica napus]	3	462.887	-0.44511	0.00091461	112.41	1	3584.9	2888.6	3934.3	4095.6	3029.6	1358	4730.5	3874	6042.8	4341.8	2923.2	1676
2476	NCSATVGQVGNVGVNQK	17	iodo TMT-6plex var	_NC(io)SATVGQVGNVGVNQK_	GSBRNA2T00015371001	50S ribosomal protein L2P [Medicago truncatula]	3	668.688	0.52631	8.0223e-11	117.13	1	1093.6	1074.1		695.71	748.13		1072.8	1259.3		595.02	896.81
2481	NCSYDQVR	8	iodo TMT-6plex var	_NC(io)SYDQVR_	GSBRNA2T00154161001	NAD(P)H-quinone oxidoreductase subunit U, chloroplastic-like [Brassica napus]	2	657.327	0.1359	0.0014836	132.84	1	12697	7715.1		1602	938.93		10354	5882.7		2801.5	1716.3
2482	NCVLVAGSQSGVSAAK	16	iodo TMT-6plex var	_NC(io)VLVAGSQSGVSAAK_	GSBRNA2T00067876001	haloacid dehalogenase-like hydrolase domain-containing protein At3g48420 [Brassica napus]	3	607.335	-0.16139	0.00096737	61.127	1	1824.3		734.94	1123		645.86	1480		736	1616.8		900.02
2480	NCWIVTDGFSGGR	13	iodo TMT-6plex var	_NC(io)WIVTDGFSGGR_	GSBRNA2T00113613001	calcium sensing receptor, chloroplastic [Brassica napus]	3	580.961	0.25266	8.952e-07	106.47	1	1187.2	1716.6	1729.5	467.98	198.73	467.45	1351	1521.3	1488.8	435.19	441.46	609.01
2485	NCYEALPEDGK	11	iodo TMT-6plex var	_NC(io)YEALPEDGK_	GSBRNA2T00078939001	flavone 3'-O-methyltransferase 1-like [Brassica napus]	2	784.385	-0.21557	0.010861	60.509	1	1548.9			1565.9			2249.9			1423.3
2487	NCYFPLFVSPGVLEK	15	iodo TMT-6plex var	_NC(io)YFPLFVSPGVLEK_	GSBRNA2T00028951001	proline--tRNA ligase, cytoplasmic-like [Brassica napus]	3	681.371	0.17299	0.0089787	48.216	1	1256.9	1204.2	1078.3	814.03	735.53	256.9	1229.9	991.28	1131.7	736.69	799.05	441.09
2484	NDDGSLSCGYCSFR	14	2 iodo TMT-6plex var	_NDDGSLSC(io)GYC(io)SFR_	GSBRNA2T00041142001	probable protein phosphatase 2C 76 [Brassica rapa]	3	728.019	-0.089248	0.014858	42.317	1		5408.1			496.25			5267.1			614.72
2489	NECPHIVVGTPGR	13	iodo TMT-6plex var	_NEC(io)PHIVVGTPGR_	GSBRNA2T00022681001	DEAD-box ATP-dependent RNA helicase 56-like [Brassica napus]	3	569.977	0.075371	0.0016268	66.784	1	3182.8	1723.7		2715.8	1457.8		4071.3	1728.5		3761.4	1537.3
2491	NEIIEQCK	8	iodo TMT-6plex var	_NEIIEQC(io)K_	GSBRNA2T00029595001	Fanconi anemia group I protein-like [Brassica napus]	2	653.355	0.59811	0.024586	65.465	1	6226.9	4663.4		1090.7	802.69		5646.8	3978.5		1515.8	1191.5
2492	NETILASCCFGRR	13	2 iodo TMT-6plex var	_NETILASC(io)C(io)FGRR_	GSBRNA2T00114982001	histone-binding protein MSI1-like [Brassica napus]	3	710.056	-0.37502	0.023713	40.767	2	2470.3			5024.9			1596.7			5605.1
2493	NEYCMEVTPK	10	iodo TMT-6plex var	_NEYC(io)MEVTPK_	GSBRNA2T00076110001	probable UTP--glucose-1-phosphate uridylyltransferase 2 [Brassica napus]	2	771.878	0.11649	0.0022799	81.923	1	2550.7	3013.1		1229.7	1387.6		3288.4	3087.2		1209.4	1480.2
2513	NIFNLSAPGTIICQPPEDDCDLK	23	2 iodo TMT-6plex var	_NIFNLSAPGTIIC(io)QPPEDDC(io)DLK_	GSBRNA2T00025604001	bifunctional aspartokinase/homoserine dehydrogenase 2, chloroplastic-like [Brassica napus]	4	791.165	0.32087	0.00014282	53.964	1		1677			155.64			1961.9			252.51
2516	NISVVAVCPK	10	iodo TMT-6plex var	_NISVVAVC(io)PK_	GSBRNA2T00105851001	ketol-acid reductoisomerase, chloroplastic [Brassica oleracea var. oleracea]	2	679.905	0.35173	0.00024155	104.82	3	7487.2	6777.7	3776.9	1896.8	2211	1054.3	8536.8	7297	4867.8	2773.2	2591.5	1251.6
2519	NITCLTR	7	iodo TMT-6plex var	_NITC(io)LTR_	GSBRNA2T00076925001	---	2	575.334	0.061293	0.010874	90.135	1	9808.7	10381	6284.1	769.14	606.48	455.51	11747	11582	7397.8	649.51	618.79	561.73
1767	NITGVELCHVER	12	iodo TMT-6plex var	_NITGVELC(io)HVER_	GSBRNA2T00134237001	60S ribosomal protein L4-1-like [Brassica oleracea var. oleracea]	3	566.977	-0.35226	0.0002173	98.942	1	4015.1	3527.3	3026.5	607.98	391.24	455.67	6071.8	4560.3	4190.8	666.12	660.62	563.77
2522	NKWIPCVEFELEHGFVYR	18	iodo TMT-6plex var	_NKWIPC(io)VEFELEHGFVYR_	GSBRNA2T00114447001	ribulose bisphosphate carboxylase small chain, chloroplastic [Brassica napus]	4	649.59	0.18985	3.4461e-07	86.777	1		3240.1			859.29			2954.3			1088.4
1771	NLCSAIAK	8	iodo TMT-6plex var	_NLC(io)SAIAK_	GSBRNA2T00024656001	malate dehydrogenase 1, mitochondrial-like [Brassica napus]	2	574.837	-0.57031	0.0034965	117.76	1	5397.9	5154.2	4080.8	1523.9	1010.3	438.79	4979.8	4638	4113.9	1628.6	1114.5	811.22
2532	NLLQVIGDCGDEYR	14	iodo TMT-6plex var	_NLLQVIGDC(io)GDEYR_	GSBRNA2T00118674001	flagellar radial spoke protein 5 [Brassica rapa]	3	641.998	0.026447	0.00089671	68.044	1		2243.7			356.25			1726.1			577.64
1775	NLNAAVVDCCIGIPVYFTDLQR	22	2 iodo TMT-6plex var	_NLNAAVVDC(io)C(io)IGIPVYFTDLQR_	GSBRNA2T00024636001	---	3	1028.22	-0.30771	4.3358e-06	67.76	1			1803.3			0			2385.1			0
2535	NLPGVELCHVER	12	iodo TMT-6plex var	_NLPGVELC(io)HVER_	GSBRNA2T00080700001	60S ribosomal protein L4-1-like [Brassica oleracea var. oleracea]	3	565.645	-0.4015	0.02487	44.511	1	2074.7			827.32			2495.7			1240
2537	NLSQQCLNALAK	12	iodo TMT-6plex var	_NLSQQC(io)LNALAK_	GSBRNA2T00155495001	transketolase-1, chloroplastic-like [Brassica napus]	2	816.459	-0.062806	9.8802e-12	157.22	1	3048	3857.6	3935.1	110.48	110.08	205.62	2713.3	3942.2	3223.8	386.3	508.67	375.9
1783	NLVEVFCK	8	iodo TMT-6plex var	_NLVEVFC(io)K_	GSBRNA2T00059649001	ATPase 2, plasma membrane-type-like [Brassica napus]	2	640.865	-0.60333	0.007317	91.318	1	3161.6	4710.8	4007.4	411.15	781.72	465.2	2599	3811.6	3677.9	590.96	1003.9	645.18
2542	NLYIECR	7	iodo TMT-6plex var	_NLYIEC(io)R_	GSBRNA2T00133119001	L-type lectin-domain containing receptor kinase I.7-like [Brassica napus]	2	620.339	0.010735	0.035336	60.788	1	9677.2	8855.5	17227	589.56	503.47	2387.1	8753.4	7134.2	15432	429.75	537.71	2698.5
2543	NMCGIATCASYPIVA	15	2 iodo TMT-6plex var	_NMC(io)GIATC(io)ASYPIVA_	GSBRNA2T00133095001	thiol protease aleurain [Brassica oleracea var. oleracea]	3	724.718	0.29983	0.00021707	72.898	1	3788.3	4727.4		0	0		2722.1	3075.6		294.68	0
2544	NMCGIATCASYPVVA	15	2 iodo TMT-6plex var	_NMC(io)GIATC(io)ASYPVVA_	GSBRNA2T00047869001	thiol protease aleurain-like [Brassica napus]	3	720.046	1.2808	0.00012283	77.776	2	2776.6	8111	5085.8	125	213.8	0	1882.7	5012.9	3276.5	276.06	414.93	122.2
2549	NMMCAADPR	9	iodo TMT-6plex var	_NMMC(io)AADPR_	GSBRNA2T00058778001	---	2	669.32	0.25905	0.048371	49.715	1	7488.2			3244.9			7924.3			3076.6
2555	NNAIVCNIGHFDNEIDMQGLETYPGVK	27	iodo TMT-6plex var	_NNAIVC(io)NIGHFDNEIDMQGLETYPGVK_	GSBRNA2T00095912001	adenosylhomocysteinase 2 [Brassica napus]	4	830.911	0.37459	1.0028e-10	92.147	1	840.74			0			932.47			289.84
2557	NNLIYGQHHCGK	12	iodo TMT-6plex var	_NNLIYGQHHC(io)GK_	GSBRNA2T00100794001	ribosomal protein L2 (chloroplast) [Schrenkiella parvula]	3	571.633	0.13807	0.0054965	58.172	1	2799.5	1917.3		478.63	554.03		3176.8	2314.3		644.81	585.86
2559	NNPCLIGEPGVGK	13	iodo TMT-6plex var	_NNPC(io)LIGEPGVGK_	GSBRNA2T00142211001	chaperone protein ClpC1, chloroplastic [Brassica napus]	2	813.945	-0.27913	0.00096387	74.987	1	1748.4	2172.4	2369	322.45	484.83	664.71	1772.9	2928.4	2585.2	547.76	694.8	834.86
2554	NNVTSIIAGCTSR	13	iodo TMT-6plex var	_NNVTSIIAGC(io)TSR_	GSBRNA2T00067886001	ATP-dependent Clp protease proteolytic subunit 4, chloroplastic-like [Brassica napus]	2	832.951	0.4359	3.604e-08	116.98	2		7041.1			365.09			4775.3			545.16
1798	NPPPGYTCSI	10	iodo TMT-6plex var	_NPPPGYTC(io)SI_	GSBRNA2T00135010001	36.4 kDa proline-rich protein [Brassica oleracea var. oleracea]	2	689.355	-0.35117	0.00056451	105.52	4	10734	16830	18726	1450.6	1712.2	1585.4	10566	16576	16964	1801.4	2406.8	2535.6
2567	NPQLSCSK	8	iodo TMT-6plex var	_NPQLSC(io)SK_	GSBRNA2T00107570001	---	2	603.329	0.48824	0.0018267	119.21	1	4527.9	3790.6		903.95	1098		3903.3	2868.5		1093	1253.4
2576	NSGQTCVCANR	11	2 iodo TMT-6plex var	_NSGQTC(io)VC(io)ANR_	GSBRNA2T00146351001	succinate-semialdehyde dehydrogenase, mitochondrial [Brassica napus]	3	604.319	0.57245	0.027019	40.727	1	6119.1			377.68			5786.1			464.12
2577	NSLAEAVVEGTGDHCCEYMTGGCVVVLGK	29	3 iodo TMT-6plex var	_NSLAEAVVEGTGDHC(io)C(io)EYMTGGC(io)VVVLGK_	GSBRNA2T00136396001	ferredoxin-dependent glutamate synthase 1, chloroplastic/mitochondrial [Brassica napus]	4	983.005	-0.37896	4.3695e-20	124.17	1	10732	3005.3	4650.2	329.62	303.71	137.63	7088.1	1976.4	3739.7	156.07	0	0
2582	NTGSATCK	8	iodo TMT-6plex var	_NTGSATC(io)K_	GSBRNA2T00028785001	---	3	370.864	-0.9593	0.014342	63.534	1	51198	21500		5017.2	2438		69054	30448		6187.8	3146.8
2579	NTSFNLLQGCR	11	iodo TMT-6plex var	_NTSFNLLQGC(io)R_	GSBRNA2T00011113001	4-hydroxy-3-methylbut-2-en-1-yl diphosphate synthase (ferredoxin), chloroplastic-like isoform X2 [Brassica napus]	3	527.95	0.048845	5.1318e-06	113.93	1	5836.9	3582.7		1004.6	879.32		7939.6	4294.1		1965.2	1074.6
1810	NTVECITGTISR	12	iodo TMT-6plex var	_NTVEC(io)ITGTISR_	GSBRNA2T00105851001	ketol-acid reductoisomerase, chloroplastic [Brassica oleracea var. oleracea]	3	541.629	-1.1821	0.0006628	81.239	1	2069.1	5363.8	2511.4	933.06	1369.4	779.5	3019.9	6631.9	3387.8	822.75	1629.7	827.05
1812	NTWPLCLEFLTSGK	14	iodo TMT-6plex var	_NTWPLC(io)LEFLTSGK_	GSBRNA2T00110231001	sorbitol dehydrogenase [Raphanus sativus]	3	646.683	0.21531	0.0052093	55.755	1		1314.3	1147.4		0	340.12		1315.5	953.8		446.01	456.09
2596	NVCIIPVSAHGTNPASAAMCGMK	23	2 iodo TMT-6plex var	_NVC(io)IIPVSAHGTNPASAAMC(io)GMK_	GSBRNA2T00121192001	---	4	733.386	0.13006	1.7951e-12	110.26	3	6456	7484	4721.2	198.91	416.29	255.46	5184.2	5847.2	4336.9	446.56	537.04	170.23
2599	NVMENCR	7	iodo TMT-6plex var	_NVMENC(io)R_	GSBRNA2T00094857001	glutamate decarboxylase 1-like [Brassica napus]	2	597.8	0.29668	0.015804	78.616	1		6794.3			1756.2			7355.2			2482.2
2607	NVQSASAGCVTDE	13	iodo TMT-6plex var	_NVQSASAGC(io)VTDE_	GSBRNA2T00083772001	dihydroxy-acid dehydratase, chloroplastic [Brassica napus]	2	805.388	0.71917	0.00010614	92.247	1	3390.7		1353.8	273.35		213.82	3472.4		1305.3	544.69		262.76
1828	NVVCNFTEGAMYSFPQIK	18	iodo TMT-6plex var	_NVVC(io)NFTEGAMYSFPQIK_	GSBRNA2T00119372001	glutamate--glyoxylate aminotransferase 1-like [Brassica napus]	3	793.068	0.19383	0.00012472	68.243	1	775.03		1182.9	319.03		262.01	936.43		1330.9	233.03		431.01
1829	NVVCNFTEGAMYSFPQIR	18	iodo TMT-6plex var	_NVVC(io)NFTEGAMYSFPQIR_	GSBRNA2T00073054001	glutamate--glyoxylate aminotransferase 1 [Brassica napus]	3	802.403	0.041679	7.082e-17	152.9	2	3241.9	3322.8	3889.6	1015	961.25	709.86	2715.6	2928.5	3034.4	1044.3	975.96	1153
1834	NYFSGLFLCR	10	iodo TMT-6plex var	_NYFSGLFLC(io)R_	GSBRNA2T00138775001	protein TIC 55, chloroplastic [Brassica napus]	3	516.945	-0.35441	0.00017198	108.57	1			6520.1			413.4			5219.2			508.21
2622	NYMIYNYCTDR	11	iodo TMT-6plex var	_NYMIYNYC(io)TDR_	GSBRNA2T00067401001	---	2	892.919	0.11897	1.0328e-05	116.55	1	3885.4	10357	6360.6	945.78	3186	1871.1	1665	3027.2	1723.5	500.3	1828.9	846.28
1847	PCELYVCNIPR	11	2 iodo TMT-6plex var	_PC(io)ELYVC(io)NIPR_	GSBRNA2T00085389001	31 kDa ribonucleoprotein, chloroplastic-like [Brassica napus]	4	492.026	-0.37076	3.3232e-05	110.39	1	12963	10140	11125	825.16	1117.3	1073	12846	10181	12071	1040.5	845.31	801.09
2632	PGDLGLNICK	10	iodo TMT-6plex var	_PGDLGLNIC(io)K_	GSBRNA2T00051131001	GTP-binding protein TypA/BipA homolog [Brassica oleracea var. oleracea]	2	679.887	-0.24041	4.2896e-05	121.6	1		1635.8			845.62			3475.1			1041.6
2650	PIEGDWNGAGCHTNYSTK	18	iodo TMT-6plex var	_PIEGDWNGAGC(io)HTNYSTK_	GSBRNA2T00092908001	glutamine synthetase, chloroplastic-like [Brassica napus]	3	760.362	-0.23363	1.7921e-09	100.04	1	3448.5	2939.1	2820.6	701.46	267.52	257.92	3028.8	2574.5	2058.7	821.82	549.57	521.49
2651	PLLACAK	7	iodo TMT-6plex var	_PLLAC(io)AK_	GSBRNA2T00108334001	dihomomethionine N-hydroxylase-like [Brassica oleracea var. oleracea]	2	522.825	-0.46173	0.010654	80.377	1	3941.6	7429.1	3760.2	858.93	1596.7	1235	3657.1	6364.6	3546.3	788.48	1912.6	1405.5
2641	PLLGCTIK	8	iodo TMT-6plex var	_PLLGC(io)TIK_	GSBRNA2T00154096001	ribulose 1,5-bisphosphate carboxylase/oxygenase large subunit (chloroplast) [Brassica juncea]	2	587.365	0.81303	0.00094597	127.46	3	21444	21581	17464	2391	2855.4	1271	18619	20059	14120	3204.8	3237.5	1436.6
2660	PTPDEASVASYNVACCYSK	19	2 iodo TMT-6plex var	_PTPDEASVASYNVAC(io)C(io)YSK_	GSBRNA2T00034729001	---	4	666.586	0.088628	1.123e-07	90.718	1	3935.6	2992.3	2850.2	117.74	224.65	202.26	2914.3	2603.1	2579.4	326.95	105.99	0
2681	QCGLPSFCGDYGYCDR	16	3 iodo TMT-6plex var	_QC(io)GLPSFC(io)GDYGYC(io)DR_	GSBRNA2T00148028001	epidermis-specific secreted glycoprotein EP1-like [Brassica oleracea var. oleracea]	4	693.597	-0.76033	0.0056138	46.318	1	2869.2			0			2866.2			320.78
2682	QCVAHLTGDGIAFCDLGPVDTMLPGEV	27	2 iodo TMT-6plex var	_QC(io)VAHLTGDGIAFC(io)DLGPVDTMLPGEV_	GSBRNA2T00053211001	malate dehydrogenase [NADP], chloroplastic-like isoform X1 [Brassica napus]	4	854.941	0.30947	7.9889e-15	111.11	1	1060.6			0			946.52			110.43
2683	QDFNTGNDCYEK	12	iodo TMT-6plex var	_QDFNTGNDC(io)YEK_	GSBRNA2T00062345001	GDSL esterase/lipase At1g54020-like precursor [Brassica napus]	3	588.268	0.52248	0.024695	44.614	1	2463.6			805.02			1821.5			830.07
2677	QEWGYANFIAPCVYR	15	iodo TMT-6plex var	_QEWGYANFIAPC(io)VYR_	GSBRNA2T00149645001	protochlorophyllide-dependent translocon component 52, chloroplastic-like [Brassica napus]	3	716.03	0.3226	0.00039366	69.352	1		1177.4			471.19			1227.2			558.15
2691	QIIATCMNDQK	11	iodo TMT-6plex var	_QIIATC(io)MNDQK_	GSBRNA2T00028785001	---	2	797.418	-0.16419	4.474e-06	128.88	1	2013.6	2544.6	992.03	318.99	564.32	0	3059	3310	1186.6	637.98	583.76	220.52
2700	QMICCCNK	8	3 iodo TMT-6plex var	_QMIC(io)C(io)C(io)NK_	GSBRNA2T00148813001	elongation factor 1-alpha 1-like [Brassica napus]	4	483.267	0.21296	0.00092784	108.09	1	28440	23053	11917	2897.1	2636.2	1388.1	39024	31102	16615	123.5	412.87	129.77
2705	QSGADISISCIPIDDR	16	iodo TMT-6plex var	_QSGADISISC(io)IPIDDR_	GSBRNA2T00154330001	glucose-1-phosphate adenylyltransferase large subunit 1, chloroplastic [Brassica rapa]	3	673.684	0.43322	0.0023063	54.103	1	3485.8	2930.2	2444.2	648.98	643.09	366.68	2920.5	2526.7	1596.7	682.3	646.77	431.13
2719	QSLVNAGGIIETCFWPGK	18	iodo TMT-6plex var	_QSLVNAGGIIETC(io)FWPGK_	GSBRNA2T00099128001	lipoxygenase 2, chloroplastic-like [Brassica napus]	3	750.403	0.53284	8.5385e-10	106.28	1	2921.7	2364.6	2017.2	112.31	308.87	380.5	1616	1160.9	1171.9	321.29	112.32	279.01
2721	QVFTPGYDATSCWLWK	16	iodo TMT-6plex var	_QVFTPGYDATSC(io)WLWK_	GSBRNA2T00132137001	lipoxygenase 2, chloroplastic-like [Brassica napus]	2	1116.06	-0.60994	0.0014065	62.861	1	1599.2	1562.4		350.43	0		1052.7	676.64		197.98	260.92
2714	QVPPGFQC	8	iodo TMT-6plex var	_QVPPGFQC(io)_	GSBRNA2T00047383001	14 kDa proline-rich protein DC2.15-like [Brassica napus]	2	602.821	-0.2469	0.018192	69.998	2		4819.4			1465.7			3979.3			1464.7
2716	QVQCISFIAYKPPSFTGA	18	iodo TMT-6plex var	_QVQC(io)ISFIAYKPPSFTGA_	GSBRNA2T00114447001	ribulose bisphosphate carboxylase small chain, chloroplastic [Brassica napus]	2	1143.61	-0.35876	1.9336e-15	126.91	3	9889.2	11941	7842.2	225.1	290.65	589.92	7798.5	9375.3	6290.4	230.09	637.3	627.8
2728	RAETPAGYPCIR	12	iodo TMT-6plex var	_RAETPAGYPC(io)IR_	GSBRNA2T00099540001	germin-like protein 1 [Brassica rapa]	3	554.97	-0.072562	0.0013058	67.997	2		4051.3	4566.9		496.1	336.56		3841.3	4226.4		783.31	682.43
2738	RCEEAIPLDAWVPADDVLPLCGAVLEAFR	29	2 iodo TMT-6plex var	_RC(io)EEAIPLDAWVPADDVLPLC(io)GAVLEAFR_	GSBRNA2T00088147001	ferredoxin--nitrite reductase, chloroplastic-like [Brassica napus]	4	957.515	0.56175	4.4713e-05	52.556	1	1317.2			0			1169.8			287.52
2730	RCESACPTDFLSVR	14	2 iodo TMT-6plex var	_RC(io)ESAC(io)PTDFLSVR_	GSBRNA2T00152253001	photosystem I subunit VII (plastid) [Tofieldia thibetica]	4	561.301	-0.34452	0.013657	42.947	1		5331.9			577.79			3846.4			718.8
2732	RIDYLCSHLCFLR	13	2 iodo TMT-6plex var	_RIDYLC(io)SHLC(io)FLR_	GSBRNA2T00058697001	myrosinase-like isoform X1 [Brassica napus]	5	460.261	0.2148	4.0439e-07	107.93	1	19120	16727		921.61	965.23		13368	11266		663.82	676.42
2742	RLDDCLK	7	iodo TMT-6plex var	_RLDDC(io)LK_	GSBRNA2T00115742001	3-oxoacyl-[acyl-carrier-protein] synthase I, chloroplastic-like [Brassica napus]	3	397.895	-0.48886	0.016658	62.464	1	8957.9	12725		1729.5	2088.9		7661	9992.6		2352.4	2425.1
2740	RMGLDYECR	9	Oxidation (M),iodo TMT-6plex var	_RM(ox)GLDYEC(io)R_	GSBRNA2T00084106001	transmembrane protein [Arabidopsis thaliana]	2	744.368	0.93532	0.010525	60.019	1		0			117.92			0			0
1934	RQETVEDVPCGNTVAMVGLDQFITK	25	iodo TMT-6plex var	_RQETVEDVPC(io)GNTVAMVGLDQFITK_	GSBRNA2T00069636001	elongation factor 2 [Brassica napus]	4	770.649	-0.17121	9.3161e-07	70.761	1		671.18	526.84		243.14	215.26		746.35	677.12		0	0
2763	SACDAAGSLLVFDEVQCGLGR	21	2 iodo TMT-6plex var	_SAC(io)DAAGSLLVFDEVQC(io)GLGR_	GSBRNA2T00065209001	acetylornithine aminotransferase, chloroplastic/mitochondrial-like [Brassica oleracea var.oleracea]	3	923.819	0.30662	9.2596e-16	124.25	1	6641.7	3014		469.23	489.89		5977.8	2329.8		355.04	340.56
2762	SAGPLIIACK	10	iodo TMT-6plex var	_SAGPLIIAC(io)K_	GSBRNA2T00120820001	succinyl-CoA ligase [ADP-forming] subunit beta, mitochondrial-like [Brassica napus]	3	434.599	-0.9342	0.028684	44.57	1	6660.6	5330.1		1987.2	2208.7		5593.9	4902.5		1900.8	2316.4
2772	SAGVSCESYWPMLFAK	16	iodo TMT-6plex var	_SAGVSC(io)ESYWPMLFAK_	GSBRNA2T00134118001	60S acidic ribosomal protein P1-3-like [Brassica napus]	3	702.351	0.38575	0.0011908	58.814	1	1334			653.57			1531.7			777.56
2773	SAHICSSMGPSIK	13	iodo TMT-6plex var	_SAHIC(io)SSMGPSIK_	GSBRNA2T00156721001	50S ribosomal protein L1, chloroplastic-like [Brassica napus]	2	823.931	0.42747	1.5876e-12	163.09	1	4519.1	1822.6	2452.7	570.88	590.03	630.7	4504.4	2191.7	2608.2	1218.4	790.29	1276.2
2774	SAPQCGFSQR	10	iodo TMT-6plex var	_SAPQC(io)GFSQR_	GSBRNA2T00079156001	bifunctional monothiol glutaredoxin-S16, chloroplastic-like [Brassica napus]	2	705.361	0.41302	0.00090059	90.689	1	5747.2	6949.1		1377	1756.5		4169.9	5792.4		1470.9	2266.8
2778	SAQLCVLAEDCNQPDYVK	18	2 iodo TMT-6plex var	_SAQLC(io)VLAEDC(io)NQPDYVK_	GSBRNA2T00085634001	40S ribosomal protein S12-1 [Brassica napus]	3	885.461	0.36012	1.902e-09	100.82	2	2836.5	11442	3988.6	283.9	1014.6	476.97	4625.3	16649	6532.1	218.47	584.85	134.32
2793	SCALINQK	8	iodo TMT-6plex var	_SC(io)ALINQK_	GSBRNA2T00156553001	60S ribosomal protein L9-1 [Brassica napus]	2	603.347	0.46973	0.0030467	102.51	1	2165.8	2158.7	2707.6	692.89	385.21	338.13	2881.5	2780	3819.2	1076.3	710.23	717.74
2796	SCMDLPFVIK	10	Oxidation (M),iodo TMT-6plex var	_SC(io)M(ox)DLPFVIK_	GSBRNA2T00112973001	Cysteine/Histidine-rich C1 domain family protein [Arabidopsis thaliana]	2	749.404	-0.057667	0.013647	56.916	1	8470.9	7394		1168.4	905.51		6179.8	6271.7		1560.3	1497.4
2798	SCNALLLK	8	iodo TMT-6plex var	_SC(io)NALLLK_	GSBRNA2T00048341001	bifunctional enolase 2/transcriptional activator [Brassica napus]	3	397.576	-0.71682	0.01701	60.91	1	6391.4	6196.7		718.51	995.66		8257.3	7930.4		872.48	1174.2
2799	SCSASLAPVILSR	13	iodo TMT-6plex var	_SC(io)SASLAPVILSR_	GSBRNA2T00125373001	oxalate--CoA ligase [Brassica napus]	3	544.982	0.43554	3.4223e-06	107.65	1	2804.3	1977		909.01	599.7		2233.3	1710.1		1426.8	943.91
2792	SCVDQCQK	8	2 iodo TMT-6plex var	_SC(io)VDQC(io)QK_	GSBRNA2T00109816001	post-GPI attachment to proteins factor 3-like [Brassica napus]	3	523.614	-0.16567	0.024445	45.738	1	58939	57963		3932.9	3709		53393	51883		812.57	725.2
2801	SCVLEPLIEQMQK	13	iodo TMT-6plex var	_SC(io)VLEPLIEQMQK_	GSBRNA2T00116192001	NAD(P)H-quinone oxidoreductase subunit S, chloroplastic [Brassica oleracea var. oleracea]	3	616.337	-0.27784	0.0045413	57.434	1	1325.3			665.67			884.66			620.04
1952	SCVNVIDAK	9	iodo TMT-6plex var	_SC(io)VNVIDAK_	GSBRNA2T00156720001	carotenoid 9,10(9',10')-cleavage dioxygenase 1 [Brassica oleracea var. oleracea]	2	639.358	-0.34176	0.024293	64.82	1	4341.1	2719.7	1994	717.26	658.95	666.81	3831.2	2330	2281.1	1033	842.92	713.35
2795	SDDFSSLCGPVIDDVK	16	iodo TMT-6plex var	_SDDFSSLC(io)GPVIDDVK_	GSBRNA2T00014811001	transmembrane protein, putative (Protein of unknown function, DUF642) [Arabidopsis thaliana]	3	676.005	0.021432	0.0021776	54.281	1		1520.1			377.98			1163.6			609.99
1954	SDDGTCVYNF	10	iodo TMT-6plex var	_SDDGTC(io)VYNF_	GSBRNA2T00124746001	ribulose bisphosphate carboxylase/oxygenase activase, chloroplastic isoform X1 [Brassica napus]	2	725.33	-0.38688	0.00042503	137.85	2	7001.1	9725.1	8980.2	198.8	809.84	0	5267.2	8957.6	7054.7	698.14	1217.9	588.81
2797	SDDGTCVYTF	10	iodo TMT-6plex var	_SDDGTC(io)VYTF_	GSBRNA2T00116818001	ribulose bisphosphate carboxylase/oxygenase activase, chloroplastic-like isoform X1 [Brassica napus]	2	718.832	1.0249	0.00039639	97.565	1	3841.6	3096.2	2441.8	492.54	497.25	257.15	4291.1	3226.2	2213.4	686.79	789.52	580.13
2802	SDFHVAAQNCWVK	13	iodo TMT-6plex var	_SDFHVAAQNC(io)WVK_	GSBRNA2T00115207001	triosephosphate isomerase, cytosolic-like [Brassica napus]	2	917.467	-0.15802	0.00013409	88.338	1	1558	1743.5	4685.9	319.87	372.99	837.44	1520.8	2248.3	4706.7	350.55	584.98	1317.3
2805	SDLDIVSNASCTTNCLAPLAK	21	2 iodo TMT-6plex var	_SDLDIVSNASC(io)TTNC(io)LAPLAK_	GSBRNA2T00092896001	glyceraldehyde-3-phosphate dehydrogenase, cytosolic-like [Brassica napus]	3	932.166	-0.31476	3.185e-19	126.91	1	5082.7	7009	2366.3	525.04	799.92	108.57	6356.4	10163	2977.8	598.54	386.56	122.04
2818	SDPMVVCTMEESGEHIVAGAGELHLEICLK	30	2 iodo TMT-6plex var	_SDPMVVC(io)TMEESGEHIVAGAGELHLEIC(io)LK_	GSBRNA2T00028785001	---	5	771.996	0.17078	0.00011533	47.73	2	3789.4			111.71			4767.2			523.35
1967	SDVLPHCEVDAVDPK	15	iodo TMT-6plex var	_SDVLPHC(io)EVDAVDPK_	GSBRNA2T00156179001	chloroplast stem-loop binding protein of 41 kDa b, chloroplastic isoform X1 [Brassica napus]	2	977.001	-0.72565	0.00050641	77.192	1		2987.3	4506.7		0	700.04		1765.3	2907.6		461.31	783.78
1970	SEGGYVWACK	10	iodo TMT-6plex var	_SEGGYVWAC(io)K_	GSBRNA2T00124471001	cytosolic isocitrate dehydrogenase [NADP]-like [Brassica oleracea var. oleracea]	2	714.861	-0.21993	0.00065284	104.05	1	4971.1	3376.2	3800.4	1316.4	347.61	517.62	5508	3814.2	3759.1	1807.9	625.19	549.22
2823	SEMPLDVLVCNAAVYFPTAK	20	iodo TMT-6plex var	_SEMPLDVLVC(io)NAAVYFPTAK_	GSBRNA2T00149450001	---	3	833.106	0.39496	0.0029373	43.696	1		1003.2			213.42			1357.7			591.98
2828	SEVGDSAFEDQCSR	14	iodo TMT-6plex var	_SEVGDSAFEDQC(io)SR_	GSBRNA2T00041298001	beta carbonic anhydrase 1, chloroplastic-like [Raphanus sativus]	2	929.926	0.3053	6.8096e-46	244.71	3	11832	24359	11319	871.86	775.84	728.23	9625.7	19492	8533.2	1418.3	663.45	1082.3
2835	SFCYVSDMVDGLIR	14	iodo TMT-6plex var	_SFC(io)YVSDMVDGLIR_	GSBRNA2T00148741001	UDP-glucuronic acid decarboxylase 3 [Brassica napus]	3	645.329	0.1071	1.5014e-05	94.09	1	974.74	1302.8		217.88	330.08		885.76	1454.2		486.68	302.66
1995	SFNHEYCSK	9	iodo TMT-6plex var	_SFNHEYC(io)SK_	GSBRNA2T00116809001	delta-1-pyrroline-5-carboxylate synthase A-like [Brassica napus]	3	481.901	-0.95983	0.0031004	77.288	1	6627.8	4002.1	4048.7	697.32	914.01	828.06	10309	9455.4	8422.5	1135.2	1210.3	877.4
2865	SFQCELVMAK	10	iodo TMT-6plex var	_SFQC(io)ELVMAK_	GSBRNA2T00155196001	---	2	742.894	0.2759	3.0574e-06	146.71	2	11272	12271	10534	1557	1116.1	1000.8	11302	11412	10023	1271.8	1232.4	1041.8
2894	SFTFIDECVEGVLR	14	iodo TMT-6plex var	_SFTFIDEC(io)VEGVLR_	GSBRNA2T00144298001	GDP-mannose 3,5-epimerase-like [Brassica napus]	2	972.509	-0.25029	3.3372e-11	130.61	1	6558.7	4512.5	3601.6	584.9	278.52	304.9	7223.6	4723.7	3915.6	611.7	698.9	431.7
2903	SGCTYPEKPDFN	12	iodo TMT-6plex var	_SGC(io)TYPEKPDFN_	GSBRNA2T00072862001	adenosine kinase 1 [Brassica napus]	3	562.938	-0.37405	0.00099395	76.165	1	2795.4	1464.1	2291.3	795.49	724.55	819.31	3050.2	1733.7	3286.3	864.96	862.06	1479.5
2029	SGLGFCDIAVGFGDK	15	iodo TMT-6plex var	_SGLGFC(io)DIAVGFGDK_	GSBRNA2T00075157001	photosynthetic NDH subunit of lumenal location 4, chloroplastic [Brassica oleracea var. oleracea]	3	605.648	-0.68517	0.018167	41.422	1			1349.1			320.33			1263.5			346.81
2921	SGTYFCVDK	9	iodo TMT-6plex var	_SGTYFC(io)VDK_	GSBRNA2T00080533001	ferredoxin-thioredoxin reductase catalytic chain, chloroplastic [Brassica napus]	2	674.842	0.2107	0.00048436	112.04	1	7401.8			851.89			6931.9			1351
2931	SHLENCHLLAAINYK	15	iodo TMT-6plex var	_SHLENC(io)HLLAAINYK_	GSBRNA2T00143376001	---	2	1028.05	-0.45312	7.2863e-05	82.59	1	1534.5			0			1787.9			285.31
2045	SIAGSTAEILCGLK	14	iodo TMT-6plex var	_SIAGSTAEILC(io)GLK_	GSBRNA2T00062209001	fruit protein pKIWI502-like [Brassica napus]	2	846.482	0.17678	0.00059748	84.297	1	3808.5	4620.6	2388.5	596.77	919.95	418.68	3294.4	4376	2197.4	853.67	1019.9	397.58
2050	SIFCIIEK	8	iodo TMT-6plex var	_SIFC(io)IIEK_	GSBRNA2T00151677001	HSP20-like chaperones superfamily protein [Arabidopsis thaliana]	2	641.376	-0.35388	0.014167	81.163	1		2590.1	2959		503.35	413.74		3121.4	3268.6		678	706.06
2920	SIFCIVEK	8	iodo TMT-6plex var	_SIFC(io)IVEK_	GSBRNA2T00150419001	HSP20-like chaperones superfamily protein [Arabidopsis thaliana]	2	634.368	0.16328	0.01272	78.113	1		1871.9			755.78			1921.2			1060
2951	SIGLLCFR	8	iodo TMT-6plex var	_SIGLLC(io)FR_	GSBRNA2T00121224001	protein TIC 22, chloroplastic-like [Brassica napus]	3	413.248	-0.33055	0.032548	49.097	1	7929.9			932.94			7275.7			1241.2
2932	SILRPDFHVAAQNCWVK	17	iodo TMT-6plex var	_SILRPDFHVAAQNC(io)WVK_	GSBRNA2T00126364001	triosephosphate isomerase, cytosolic-like [Brassica napus]	3	771.754	0.90205	4.1651e-08	105.28	1	3236.5	2232	3349.8	0	112.26	109.07	2888.6	2486.9	3558.6	373.7	122.07	283.72
2961	SIPEGAVVCNVEHHVGDR	18	iodo TMT-6plex var	_SIPEGAVVC(io)NVEHHVGDR_	GSBRNA2T00131000001	60S ribosomal protein L8-3-like [Brassica napus]	4	562.543	-0.26751	0.00029052	59.372	1	1140.8			813.81			1261.4			1053.8
2959	SKFDNLYGCR	10	iodo TMT-6plex var	_SKFDNLYGC(io)R_	GSBRNA2T00025157001	adenosylhomocysteinase 1-like isoform X2 [Brassica napus]	2	766.398	0.75216	3.1242e-05	126.66	1	5605.1	8337.3	7167.3	890.19	1635.7	1077	9105.3	11931	11842	1043.3	2059.1	1422
2996	SLASFPQGCFYSTALGGLR	19	iodo TMT-6plex var	_SLASFPQGC(io)FYSTALGGLR_	GSBRNA2T00148992001	---	3	768.738	0.25029	7.9591e-06	79.489	2	4681	2658.6		917.09	461.19		3569.8	1685.9		1221	689.73
2968	SLCDCGDRPIADGSLLDFLR	20	2 iodo TMT-6plex var	_SLC(io)DC(io)GDRPIADGSLLDFLR_	GSBRNA2T00016792001	phosphoenolpyruvate carboxylase 2 [Brassica rapa]	5	565.703	-0.30014	2.8356e-17	133.93	2	5070.4	9251.7	2835.7	383.7	817.33	320.41	6907.9	11190	3678.2	238.24	365.18	0
2971	SLCVACGSNVGDGTEHR	17	2 iodo TMT-6plex var	_SLC(io)VAC(io)GSNVGDGTEHR_	GSBRNA2T00011833001	dicarboxylate transporter 1, chloroplastic [Brassica rapa]	3	788.404	-0.0055594	4.3403e-05	75.376	1		7437.3			528.98			6963.2			336.85
3016	SLGDEIGVPIEVYGPEATMTGICK	24	iodo TMT-6plex var	_SLGDEIGVPIEVYGPEATMTGIC(io)K_	GSBRNA2T00097045001	ATP-citrate synthase alpha chain protein 2 [Brassica napus]	3	936.817	-0.12911	9.4391e-11	97.5	1	1853.3			439.31			1999.6			580.02
3019	SLGICSQLIWDR	12	iodo TMT-6plex var	_SLGIC(io)SQLIWDR_	GSBRNA2T00045170001	citrate synthase 4, mitochondrial-like [Brassica rapa]	3	573.985	0.18481	0.0038504	62.528	1	1198.3			684.66			1165.3			699.03
3025	SLIANLSAANCYK	13	iodo TMT-6plex var	_SLIANLSAANC(io)YK_	GSBRNA2T00072862001	adenosine kinase 1 [Brassica napus]	2	848.966	-0.1091	2.0443e-07	115.34	1	1621.6			0			1772.3			529.42
3020	SLSCSAPQCGSLEVSACR	18	3 iodo TMT-6plex var	_SLSC(io)SAPQC(io)GSLEVSAC(io)R_	GSBRNA2T00005544001	protein ASPARTIC PROTEASE IN GUARD CELL 1 [Brassica napus]	5	557.9	-0.0023412	0.001989	47.942	1		3342.6			0			2569.4			0
3026	SLTCSAPQCASLR	13	2 iodo TMT-6plex var	_SLTC(io)SAPQC(io)ASLR_	GSBRNA2T00153954001	protein ASPARTIC PROTEASE IN GUARD CELL 1 isoform X1 [Brassica rapa]	4	499.527	0.18514	0.011081	49.298	1		6007.8			987.83			6374.6			1079.6
3056	SLVAYHEVGHAVCGTLTPGHDAVQK	25	iodo TMT-6plex var	_SLVAYHEVGHAVC(io)GTLTPGHDAVQK_	GSBRNA2T00048583001	ATP-dependent zinc metalloprotease FTSH 2, chloroplastic [Brassica napus]	3	973.51	-0.99441	1.4274e-35	167.1	1	2205.6	2631.4	1255.9	137.5	0	0	2471.4	2397.8	1305.5	108.45	0	0
3047	SNLVGMGIIPLCFK	14	iodo TMT-6plex var	_SNLVGMGIIPLC(io)FK_	GSBRNA2T00073281001	aconitate hydratase 1-like [Brassica napus]	3	607.682	-0.038017	0.021388	41.621	1		3522			1516.7			2225.8			1962.3
3101	SPLVQVLPLWFWHQNACK	18	iodo TMT-6plex var	_SPLVQVLPLWFWHQNAC(io)K_	GSBRNA2T00138775001	protein TIC 55, chloroplastic [Brassica napus]	4	624.595	-0.02652	3.889e-29	171.46	1	3388.6	2383.8	675.31	588.31	583.16	0	2551.9	1583.1	801.31	640.52	691.19	114
3106	SPSGNDYLSEVCR	13	iodo TMT-6plex var	_SPSGNDYLSEVC(io)R_	GSBRNA2T00108104001	epimerase family protein SDR39U1 homolog, chloroplastic [Brassica oleracea var. oleracea]	2	878.43	-0.18845	1.8791e-08	125.82	1	4091.5	2987.1	3392.3	361.58	251.85	394.29	3586.4	2571.5	2971.5	462.62	522.4	491.26
3110	SPVGTHCVGLAYNLAGFLLAAGEK	24	iodo TMT-6plex var	_SPVGTHC(io)VGLAYNLAGFLLAAGEK_	GSBRNA2T00035428001	ATP-dependent Clp protease proteolytic subunit-related protein 2, chloroplastic-like [Brassica napus]	4	680.122	0.20859	0.00070704	46.558	2	463.8			235.07			529.07			0
2160	SQGFEILAFPCNQFGGQEPGSNPEIK	26	iodo TMT-6plex var	_SQGFEILAFPC(io)NQFGGQEPGSNPEIK_	GSBRNA2T00091439001	phospholipid hydroperoxide glutathione peroxidase 1, chloroplastic-like [Brassica napus]	3	1041.85	0.12377	2.6619e-05	59.912	1	3668.5	2377.5	1436.9	0	0	115.35	2886.2	2228.8	1402.9	238.24	0	117.2
3085	SQICMVGDR	9	iodo TMT-6plex var	_SQIC(io)MVGDR_	GSBRNA2T00114576001	phosphoglycolate phosphatase 1B, chloroplastic [Brassica napus]	2	669.347	0.3743	0.0038224	85.813	1	12769	13288	12459	3821.6	3390	3376.7	11112	11154	10133	4125.2	3552	3072
2174	SSAYLSVEQACIHR	14	iodo TMT-6plex var	_SSAYLSVEQAC(io)IHR_	GSBRNA2T00143112001	---	3	631.667	-0.9114	2.0917e-10	156	2	3547.6	3167.8	9311.9	323.32	445.12	942.19	3890.9	3446.5	10331	372.34	507.18	912.88
2175	SSCSPSSSWYTQQMDATSQAR	21	iodo TMT-6plex var	_SSC(io)SPSSSWYTQQMDATSQAR_	GSBRNA2T00099688001	xyloglucan endotransglucosylase/hydrolase protein 24 [Brassica oleracea var. oleracea]	3	879.734	-0.82183	7.7807e-08	89.011	1			1094.8			220.52			658.63			252.8
3097	SSDGFLYCEGTK	12	iodo TMT-6plex var	_SSDGFLYC(io)EGTK_	GSBRNA2T00135759001	diaminopimelate decarboxylase 2, chloroplastic-like [Brassica napus]	2	818.398	0.12114	1.1246e-12	163.51	2	3212.2	7314.7	1876.5	349.34	638.61	0	3731.3	9073.5	2277.5	402.74	1166.6	128.32
3148	SSGTWSGVCGNNNACK	16	2 iodo TMT-6plex var	_SSGTWSGVC(io)GNNNAC(io)K_	GSBRNA2T00146665001	defensin-like protein 3 [Brassica napus]	3	748.374	-0.21028	8.4801e-18	148.7	1	5848.8		2088.6	0		0	3294.4		1122.5	246.3		406.31
3164	SSQYCTDVAK	10	iodo TMT-6plex var	_SSQYC(io)TDVAK_	GSBRNA2T00070910001	2-oxoglutarate dehydrogenase, mitochondrial-like [Brassica napus]	2	715.861	0.27522	0.00018927	107.97	1	5642.4	5933	2696.2	470.76	368.07	367.17	4400.7	4562.8	1881.1	683.86	764.38	519.22
2202	SSVCDIAPTGLK	12	iodo TMT-6plex var	_SSVC(io)DIAPTGLK_	GSBRNA2T00103897001	tubulin beta-4 chain-like [Brassica napus]	2	760.421	-0.8281	0.042427	47.712	1			2003.7			1312.6			2489.9			1200.4
3179	STFQNIDCPSLNCNPTCPAVSTED	24	3 iodo TMT-6plex var	_STFQNIDC(io)PSLNC(io)NPTC(io)PAVSTED_	GSBRNA2T00146924001	pectin acetylesterase 11 isoform X1 [Brassica oleracea var. oleracea]	4	886.693	-0.12876	0.000785	43.956	1	5276.5			269.92			4738.7			0
3144	STIQCLTRPELYFVDVLR	18	iodo TMT-6plex var	_STIQC(io)LTRPELYFVDVLR_	GSBRNA2T00106508001	annexin D1 [Brassica rapa]	4	621.348	-0.1894	2.7936e-12	114.55	2	1084.3	2034.9	771.84	370.57	96.257	661.06	1978.8	3707.6	1377.1	327.59	633.23	478.04
3159	STRRQPYCSVIPVMIQLLELISHDR	25	Oxidation (M),iodo TMT-6plex var	_STRRQPYC(io)SVIPVM(ox)IQLLELISHDR_	GSBRNA2T00083171001	Zinc-finger domain of monoamine-oxidase A repressor R1 protein [Arabidopsis thaliana]	4	825.703	0.25722	0.00057189	43.841	1		0			2101.8			119.13			1697.4
3222	SVPELCGSVK	10	iodo TMT-6plex var	_SVPELC(io)GSVK_	GSBRNA2T00079156001	bifunctional monothiol glutaredoxin-S16, chloroplastic-like [Brassica napus]	2	674.379	0.1526	0.020089	55.806	1	2493.1			781			2169.3			796.59
3192	SVVEECGENISK	12	iodo TMT-6plex var	_SVVEEC(io)GENISK_	GSBRNA2T00139004001	---	3	541.613	0.066373	0.0055379	57.567	1	1858.6	2442.9		1261.9	1872.3		2102.7	2667.3		1208.2	2097.1
3214	SYCPADFNK	9	iodo TMT-6plex var	_SYC(io)PADFNK_	GSBRNA2T00009229001	glutamyl-tRNA reductase-binding protein, chloroplastic-like [Brassica napus]	3	458.562	-0.095543	0.023636	50.473	2		3903.2			1917			5278.9			2059.2
3271	SYHPTVICR	9	iodo TMT-6plex var	_SYHPTVIC(io)R_	GSBRNA2T00111876001	T-complex protein 1 subunit gamma [Brassica napus]	3	468.925	-0.29206	0.001227	93.162	1	4212.7	6011.1	8187.7	630.96	937.9	1570.7	5807.7	7922.7	11964	913.53	1334.2	2249.3
3283	SYLGWHEQGDGAWFCGLHVDSGR	23	iodo TMT-6plex var	_SYLGWHEQGDGAWFC(io)GLHVDSGR_	GSBRNA2T00057791001	sulfite reductase [ferredoxin], chloroplastic-like [Brassica napus]	5	582.078	0.24413	2.5198e-05	65.207	1	2589.5	2634	772.72	0	168.93	0	2411.4	2394.4	623.91	276.62	357.21	298.88
3296	SYQTLCEK	8	iodo TMT-6plex var	_SYQTLC(io)EK_	GSBRNA2T00123293001	---	2	650.842	0.3273	0.0015958	131.5	1	5674.8	4459.9	4668.5	711.22	363.18	435.83	8644.5	5116.6	5863.7	1260.5	841.79	854.29
3265	SYWVPLIEDSCK	12	iodo TMT-6plex var	_SYWVPLIEDSC(io)K_	GSBRNA2T00076469001	30S ribosomal protein S10, chloroplastic-like [Brassica napus]	3	590.31	0.16179	2.518e-09	130.56	2	4971.2	17695	4937.6	233.73	2080.4	298.3	5209.9	19163	6333.9	713.31	2282.4	835.13
2314	TAACLCLTTVK	11	2 iodo TMT-6plex var	_TAAC(io)LC(io)LTTVK_	GSBRNA2T00017009001	---	3	594.684	-0.30286	6.7283e-05	105.13	1		3676.5	2876.1		633.33	251.85		5122.9	4431.1		730.54	313.08
3319	TAIIEGDVVGGTCVNR	16	iodo TMT-6plex var	_TAIIEGDVVGGTC(io)VNR_	GSBRNA2T00056523001	dihydrolipoyl dehydrogenase 2, chloroplastic [Brassica napus]	3	645.017	0.073863	4.3384e-08	107.5	1	3858.1	3924.8	2272	732.14	495.39	473.87	3900.4	3796.2	2192.4	894.29	664.76	480.04
3333	TALHFACGYGELK	13	iodo TMT-6plex var	_TALHFAC(io)GYGELK_	GSBRNA2T00130928001	ankyrin repeat domain-containing protein 2-like isoform X1 [Brassica napus]	2	869.961	-0.039551	1.8864e-06	106.29	1	7602	3703	3079.5	818.12	313.77	393.84	9147.8	4715	3956.4	699.8	607.06	536.31
2385	TAPDTFYCK	9	iodo TMT-6plex var	_TAPDTFYC(io)K_	GSBRNA2T00034927001	alanine aminotransferase 1, mitochondrial-like [Brassica napus]	2	687.85	-1.1356	0.0064343	82.287	1	4366.1	3290.9	2816.3	672.17	530.1	271.03	6159.6	4465.5	3463.9	1121.8	999.84	695.83
3368	TASCGGTACVNSFGDEQLAVDMLADK	26	2 iodo TMT-6plex var	_TASC(io)GGTAC(io)VNSFGDEQLAVDMLADK_	GSBRNA2T00037141001	sedoheptulose-1,7-bisphosphatase, chloroplastic-like [Brassica napus]	3	1087.87	-0.73085	2.3318e-29	150.36	1	8509.8	8377.6	6950.6	321.94	417.96	136.67	7172.6	7147.3	6073.8	122.96	0	332.86
3415	TASLCVR	7	iodo TMT-6plex var	_TASLC(io)VR_	GSBRNA2T00004245001	ferredoxin--NADP reductase, root isozyme 2, chloroplastic-like [Brassica napus]	2	539.816	0.15964	0.053038	53.163	1	5911.8			889.52			4118.8			1187.5
3380	TAVAVTHCR	9	iodo TMT-6plex var	_TAVAVTHC(io)R_	GSBRNA2T00153730001	40S ribosomal protein S16-3-like [Brassica napus]	3	429.578	-0.072677	0.0014153	90.906	1		10433			2678.9			12473			3730.5
3390	TAWSQCSSIGR	11	iodo TMT-6plex var	_TAWSQC(io)SSIGR_	GSBRNA2T00065464001	cathepsin B-like cysteine proteinase isoform X2 [Brassica rapa]	2	762.893	-0.38387	1.1988e-05	112.02	1	4750.4	7267.4		347.16	714.66		4185.4	6742.2		702.04	798.83
3434	TCACLLK	7	2 iodo TMT-6plex var	_TC(io)AC(io)LLK_	GSBRNA2T00100571001	violaxanthin de-epoxidase, chloroplastic-like [Brassica napus]	3	470.617	-0.34065	0.0062986	73.616	1	6476.9	6529.8		823.56	761.35		4736.7	4189.7		1055	1209
3435	TCAQDEVLR	9	iodo TMT-6plex var	_TC(io)AQDEVLR_	GSBRNA2T00038928001	DNA-directed RNA polymerase subunit beta (Protein of unknown function, DUF642) [Arabidopsis thaliana]	2	682.364	0.31608	0.0024533	91.549	1	6611.9	5711.8		1206.2	839.95		7211.9	5640.3		1604.7	1072.7
3395	TCAQIFEEAGCDTPTSPSCGACLGGPADTYAR	32	4 iodo TMT-6plex var	_TC(io)AQIFEEAGC(io)DTPTSPSC(io)GAC(io)LGGPADTYAR_	GSBRNA2T00087256001	---	5	902.655	0.43366	0.00022853	44.178	1		6275			555.95			6253.4			0
3396	TCAQIFK	7	iodo TMT-6plex var	_TC(io)AQIFK_	GSBRNA2T00077191001	3-isopropylmalate dehydratase large subunit-like [Brassica napus]	2	570.326	-0.079238	0.047023	54.157	1	4515.4	2493.9		886.24	653.36		5135.9	3095.8		1315.5	853.55
3398	TCESQSHR	8	iodo TMT-6plex var	_TC(io)ESQSHR_	GSBRNA2T00030867001	---	3	426.214	-1.3051	0.00037961	136.27	1	4390.9	3819.3		212.36	222.13		3958.7	3441.9		0	116.44
3440	TCNDVDFLLVMGDESETTR	19	iodo TMT-6plex var	_TC(io)NDVDFLLVMGDESETTR_	GSBRNA2T00103728001	thioredoxin-like protein CDSP32, chloroplastic [Brassica oleracea var. oleracea]	3	825.396	0.32596	3.7166e-13	118.72	2	1536	800.41	1232.8	639.4	0	192.53	1534.1	600.02	1571.1	852.53	0	586.42
3401	TCNYLTSSAK	10	iodo TMT-6plex var	_TC(io)NYLTSSAK_	GSBRNA2T00065813001	26S proteasome non-ATPase regulatory subunit 2 homolog A-like [Brassica napus]	2	708.871	-0.14729	0.022804	56.087	2		1930.8			2015			1775.9			2192.3
3402	TCPAHLQLR	9	iodo TMT-6plex var	_TC(io)PAHLQLR_	GSBRNA2T00090065001	osmotin-like protein [Brassica napus]	3	456.597	-0.33372	0.0016071	88.819	1	6070.8	5521.5	5722.7	1421.3	1757.7	1492.7	6026.8	5525	5461.8	1782.5	1990	1804.5
3442	TCPLLLR	7	iodo TMT-6plex var	_TC(io)PLLLR_	GSBRNA2T00006116001	histone deacetylase complex subunit SAP18 [Brassica napus]	3	382.241	-0.87101	0.012468	67.035	1	6985			1626.3			7768.2			2233.7
2415	TCPYFHQLDALYR	13	iodo TMT-6plex var	_TC(io)PYFHQLDALYR_	GSBRNA2T00147827001	trihelix transcription factor GT-2-like [Brassica oleracea var. oleracea]	3	652.671	-0.038686	0.00040921	84.297	1			1782.1			397			1618.7			653.4
3405	TCQEMEGK	8	iodo TMT-6plex var	_TC(io)QEMEGK_	GSBRNA2T00075890001	UDP-glycosyltransferase 79B6 [Brassica rapa]	2	627.805	0.00191	0.035126	59.067	1		4806.4			903.89			4522.6			1385.4
3407	TCYAQSSQIR	10	iodo TMT-6plex var	_TC(io)YAQSSQIR_	GSBRNA2T00100024001	---	2	743.388	0.5652	5.7291e-09	172.17	1	18021	22604	10654	1239	1920.2	778.25	28049	34645	16951	2187.6	2853.7	1052.3
2418	TCYAQSSQVR	10	iodo TMT-6plex var	_TC(io)YAQSSQVR_	GSBRNA2T00095651001	---	3	491.256	-0.42413	0.00019437	117.28	1	6536.9	5493.3	4298.8	815.91	1149.2	781.8	9986.2	6503.6	5541.5	897.21	1599.1	1214.8
3447	TCYPVASTNTK	11	iodo TMT-6plex var	_TC(io)YPVASTNTK_	GSBRNA2T00005618001	presequence protease 1, chloroplastic/mitochondrial [Brassica rapa]	2	757.398	0.28444	3.6647e-11	170.68	1	6317.2	4076.9	3465.8	277.38	266.29	471.69	5865.1	4384.3	3768.2	628.05	573.53	705.58
3449	TDACFIR	7	iodo TMT-6plex var	_TDAC(io)FIR_	GSBRNA2T00114136001	26S protease regulatory subunit 7 homolog A-like [Brassica rapa]	3	385.544	-0.80198	0.031865	52.018	1	15907	12385	7413.4	2286.3	2351.5	1520.3	18997	15524	9513.4	3941.2	2705.9	1953.9
2423	TDCTTCIQDAAK	12	2 iodo TMT-6plex var	_TDC(io)TTC(io)IQDAAK_	GSBRNA2T00144412001	cysteine-rich repeat secretory protein 55-like [Brassica napus]	3	643.338	-0.5923	0.0001761	97.69	1	7707.8	6372.6	8943.3	0	260.12	268.74	2543.7	2866	3823.5	0	125.71	219.69
3453	TDCVEILRPK	10	iodo TMT-6plex var	_TDC(io)VEILRPK_	GSBRNA2T00032675001	B3 domain-containing protein At5g18000 [Brassica oleracea var. oleracea]	2	751.932	-0.16701	0.024322	55.461	1	818.11			230.78			970.86			391.76
3456	TDELCCR	7	2 iodo TMT-6plex var	_TDELC(io)C(io)R_	GSBRNA2T00090065001	osmotin-like protein [Brassica napus]	3	499.935	-0.3347	0.0043224	81.784	1	19804			3020.2			18516			2842.8
3440	TDTCPECDGAGFVR	14	2 iodo TMT-6plex var	_TDTC(io)PEC(io)DGAGFVR_	GSBRNA2T00032392001	transmembrane protein [Arabidopsis thaliana]	3	710.356	0.78922	1.0892e-05	94.09	2	16377	23955	35989	624.01	982.55	1281.9	8211.5	11538	18892	0	0	638.52
3454	TEDCVGCK	8	2 iodo TMT-6plex var	_TEDC(io)VGC(io)K_	GSBRNA2T00152253001	photosystem I subunit VII (plastid) [Tofieldia thibetica]	3	504.935	-0.080111	3.4963e-07	174.52	2	112510	127670	113650	4485.9	6102.9	6210.9	66111	73934	70649	435.5	786.22	4108.9
3486	TENWYCASK	9	iodo TMT-6plex var	_TENWYC(io)ASK_	GSBRNA2T00064606001	---	2	715.85	0.21633	0.022021	62.633	1		3366.6			836.29			3410.3			1401.1
3537	TEVGYSHGFVDNPSYEDVCSETTGHNEIVR	30	iodo TMT-6plex var	_TEVGYSHGFVDNPSYEDVC(io)SETTGHNEIVR_	GSBRNA2T00056383001	peptide methionine sulfoxide reductase [Brassica rapa]	4	918.428	0.4287	1.04e-09	80.117	1	1076.9	1192		0	0		1165.8	1342.6		0	0
3555	TEYVSCPSCGR	11	2 iodo TMT-6plex var	_TEYVSC(io)PSC(io)GR_	GSBRNA2T00011113001	4-hydroxy-3-methylbut-2-en-1-yl diphosphate synthase (ferredoxin), chloroplastic-like isoform X2 [Brassica napus]	3	620.655	-0.047552	3.4063e-05	103.91	1	10304	9219.1		880.6	769.8		13697	10988		362.23	868.31
3582	TFCIPHGGGGPGMGPIGVK	19	iodo TMT-6plex var	_TFC(io)IPHGGGGPGMGPIGVK_	GSBRNA2T00121192001	---	2	1056.06	-0.44751	4.4825e-21	144.97	1	1657.8	5505.3	2056.6	381.05	1119.9	478.51	1416.4	4505.4	1495.8	369.03	1243.7	500.19
3544	TFDVCFDQLK	10	iodo TMT-6plex var	_TFDVC(io)FDQLK_	GSBRNA2T00108116001	triosephosphate isomerase, chloroplastic [Brassica napus]	2	772.903	0.21707	3.9208e-07	158.94	1	8856.4	8973.6	10879	441.64	457.46	433.46	7153.9	7482.3	9418.6	755.8	607.31	1117.4
2558	TFFCGEVDEGFKR	13	iodo TMT-6plex var	_TFFC(io)GEVDEGFKR_	GSBRNA2T00090482001	methionine aminopeptidase 1B, chloroplastic-like isoform X1 [Brassica napus]	4	466.737	-1.079	0.0011797	66.989	1			1972.8			1302.4			1698			1444.7
3575	TFLPCNLVR	9	iodo TMT-6plex var	_TFLPC(io)NLVR_	GSBRNA2T00015976001	porphobilinogen deaminase, chloroplastic-like [Brassica napus]	2	696.405	0.52619	0.0078651	76.345	1	6647.7	4540.6		692.19	397.42		8417.7	7274.9		1605.3	1144.8
3660	TFQCEAPQCK	10	2 iodo TMT-6plex var	_TFQC(io)EAPQC(io)K_	GSBRNA2T00129561001	protein ASPARTIC PROTEASE IN GUARD CELL 2-like [Brassica napus]	3	604.988	0.38588	0.001247	79.659	2	9419	3700.9	3892.6	1824.5	1046.7	1203.4	7638.1	3249.6	3012.5	1821.7	1355.3	1373.9
3610	TFQDLGVCVVQQCAK	15	2 iodo TMT-6plex var	_TFQDLGVC(io)VVQQC(io)AK_	GSBRNA2T00097775001	fe-S cluster assembly factor HCF101, chloroplastic-like [Brassica napus]	4	575.068	0.3789	6.8641e-11	124.07	1	2708.1	1960.2	2152.1	0	235.8	0	3867.2	3099.3	2322.3	408.82	294.53	449.59
3714	TFSVVWTCR	9	iodo TMT-6plex var	_TFSVVWTC(io)R_	GSBRNA2T00135468001	COX assembly mitochondrial protein 2-like [Brassica napus]	3	476.594	0.094696	0.0016368	88.495	1	8536.8	8280.4	3511.8	1113.5	1078.8	354.15	7046.5	6600.5	2609	1271.5	1573.6	563.85
3787	TFVIASNCHPQTIEICK	17	2 iodo TMT-6plex var	_TFVIASNC(io)HPQTIEIC(io)K_	GSBRNA2T00121192001	---	3	854.803	-0.27464	8.4137e-19	153.21	2	24759	14204	15874	953.52	688.07	851.15	20056	11115	11404	309.36	359.6	683.92
2747	TGCEVMSVSNEDENK	15	iodo TMT-6plex var	_TGC(io)EVMSVSNEDENK_	GSBRNA2T00005618001	presequence protease 1, chloroplastic/mitochondrial [Brassica rapa]	3	657.638	-0.51428	0.00064753	69.431	1	1700.3	1688	711.75	741.24	1054.3	509.49	1358	1346	915.86	751.78	945.33	447.68
3810	TGCNFDGSGAGR	12	iodo TMT-6plex var	_TGC(io)NFDGSGAGR_	GSBRNA2T00072343001	pathogenesis-related protein 5-like [Brassica oleracea var. oleracea]	2	735.851	-0.03797	0.0055232	64.405	1	8411			757.05			7182.1			718.7
3791	TGPGCLIELMK	11	iodo TMT-6plex var	_TGPGC(io)LIELMK_	GSBRNA2T00130384001	leucine aminopeptidase 3, chloroplastic [Brassica oleracea var. oleracea]	3	497.614	0.073063	0.0049745	62.694	1		1452	1006.2		624.63	436.41		1509.3	758.91		1143.1	543.16
3812	TGVHECYGDHGYDNK	15	iodo TMT-6plex var	_TGVHEC(io)YGDHGYDNK_	GSBRNA2T00054481001	---	3	675.309	0.2889	1.6713e-07	107.11	1	5257.4	3868.7		464.5	374.17		4897.8	3407.6		931.03	527.66
3813	TGVIQECK	8	iodo TMT-6plex var	_TGVIQEC(io)K_	GSBRNA2T00009904001	Ribosomal protein S21 family protein [Arabidopsis thaliana]	2	603.839	0.21756	0.0011967	122.44	1	5807.4	4870.8	14402	762.12	470.92	1023.8	7826.5	5471.3	16657	1196.5	908.15	1508.5
3877	TIAECLADELINAAK	15	iodo TMT-6plex var	_TIAEC(io)LADELINAAK_	GSBRNA2T00152637001	40S ribosomal protein S5-1-like [Brassica napus]	2	952.522	0.50066	2.5711e-15	148.7	1	1660.3	2972	2774.6	226.78	281.26	0	2560	4096.3	3789.5	208.56	380.4	322.43
2893	TILFAVPGAFTPTCSQK	17	iodo TMT-6plex var	_TILFAVPGAFTPTC(io)SQK_	GSBRNA2T00076521001	---	2	1055.58	-0.83274	4.9456e-13	150.37	2	4053	3903.4	4103.7	3039.1	3197.1	3271.9	4416.7	3604.8	3440.4	5015	4492.1	4823.8
3981	TILPCNLVR	9	iodo TMT-6plex var	_TILPC(io)NLVR_	GSBRNA2T00134536001	porphobilinogen deaminase, chloroplastic-like [Brassica napus]	3	453.278	-0.61641	0.0016798	88.819	1	5046.8	14271	4074	1528.2	3195.4	1092	8399.1	22584	7046.8	2439.9	6068.1	1929
3946	TIPDCEPCR	9	2 iodo TMT-6plex var	_TIPDC(io)EPC(io)R_	GSBRNA2T00008820001	15-cis-phytoene desaturase, chloroplastic/chromoplastic [Brassica napus]	3	564.637	0.38575	0.010308	58.433	1	4602.8	6889.4		429.02	801.18		4704.6	7249.6		448.54	869.83
4010	TIQFVDWCPTGFK	13	iodo TMT-6plex var	_TIQFVDWC(io)PTGFK_	GSBRNA2T00042896001	Tubulin alpha chain [Morus notabilis]	2	935.99	-0.13619	2.547e-10	148.96	1	5300.8	5169.7	6329.1	315.27	299.71	227.18	5275.8	4909.8	5644.6	497.28	805.36	650.54
3959	TIQFYTECFGMK	12	iodo TMT-6plex var	_TIQFYTEC(io)FGMK_	GSBRNA2T00047345001	putative lactoylglutathione lyase [Brassica oleracea var. oleracea]	2	898.949	0.12262	4.5365e-06	104.24	1	4365.8	4157.1	2207.7	374.63	393.55	296.99	3787.2	4302.6	2031.4	808.43	711.93	405.03
3992	TIYLVDYSCFKPPVTCR	17	2 iodo TMT-6plex var	_TIYLVDYSC(io)FKPPVTC(io)R_	GSBRNA2T00074279001	3-ketoacyl-CoA synthase 5-like isoform X3 [Brassica napus]	4	666.617	0.61572	0.00042833	61.127	2		13313			875.8			8638.3			1319.1
4069	TLAEIIYCLVVHR	13	iodo TMT-6plex var	_TLAEIIYC(io)LVVHR_	GSBRNA2T00044440001	UV-B-induced protein At3g17800, chloroplastic [Brassica rapa]	3	620.364	0.35546	6.0869e-05	92.19	1	3628.6		1583.2	337.76		0	2896.3		1192.1	425.05		448.81
2977	TLATYGINAVCTHLGCVVPWNK	22	2 iodo TMT-6plex var	_TLATYGINAVC(io)THLGC(io)VVPWNK_	GSBRNA2T00018506001	cytochrome b6-f complex iron-sulfur subunit, chloroplastic-like [Brassica napus]	4	755.416	-0.32017	6.5411e-15	128.38	1	10162	15635	4345.5	604.64	721.9	141.5	7049.8	10805	2925.4	286.27	150.08	0
2978	TLCCILENYQR	11	2 iodo TMT-6plex var	_TLC(io)C(io)ILENYQR_	GSBRNA2T00144212001	serine--tRNA ligase, cytoplasmic-like isoform X2 [Brassica rapa]	4	504.28	-0.76616	0.0005821	80.014	1	3577.7	3193.5	3751.5	129.97	482.74	262.06	4387.6	3461.5	5015.3	407.92	299.39	499.36
2980	TLCEGVAK	8	iodo TMT-6plex var	_TLC(io)EGVAK_	GSBRNA2T00143566001	malate dehydrogenase 2, glyoxysomal [Brassica oleracea var. oleracea]	2	575.329	-0.10046	0.0018018	147.36	1	8683.7	6779.8	12039	3058.2	2793.7	778.6	6304.3	6345.7	8698.8	3400.6	3028.2	1232.1
4044	TLCSNLER	8	iodo TMT-6plex var	_TLC(io)SNLER_	GSBRNA2T00155842001	eukaryotic translation initiation factor 3 subunit E-like [Brassica oleracea var. oleracea]	2	632.848	-0.2696	0.019801	68.371	1		7985.3			1450.3			10257			1890.6
4090	TLCSPFEQPELPEGTLCFASGK	22	2 iodo TMT-6plex var	_TLC(io)SPFEQPELPEGTLC(io)FASGK_	GSBRNA2T00028951001	proline--tRNA ligase, cytoplasmic-like [Brassica napus]	4	753.895	-0.085961	1.6047e-08	92.034	2	3798.2	1938.5	1910.8	253.56	230.38	193.69	4124	2333.7	2636.3	687.25	456.11	199.98
4087	TLGETLANHLTNCGFQSTPR	20	iodo TMT-6plex var	_TLGETLANHLTNC(io)GFQSTPR_	GSBRNA2T00040054001	copper-transporting ATPase PAA1, chloroplastic-like [Brassica napus]	3	830.43	0.62615	5.247e-13	114.55	1	2200.2	1899.3		211.99	379.75		1653.4	1891		318.42	373.19
4088	TLGEWAGLCK	10	iodo TMT-6plex var	_TLGEWAGLC(io)K_	GSBRNA2T00085634001	40S ribosomal protein S12-1 [Brassica napus]	3	469.594	-0.25975	0.0021594	74.841	1	12751	7188.7	7433.3	1484.6	857.41	723.71	16718	9326.8	11229	1008.2	885.21	785.27
3021	TLHPEPCVEGYSTPGGYSYK	20	iodo TMT-6plex var	_TLHPEPC(io)VEGYSTPGGYSYK_	GSBRNA2T00093888001	dihydropyrimidine dehydrogenase (NADP(+)), chloroplastic-like [Brassica napus]	4	629.31	-0.30724	2.4915e-06	76.301	1	1507	618.29	1101.9	1877.1	351.57	597.82	1273.8	663.29	672.57	1833.2	475.44	569.53
3024	TLHQAGCAGVACR	13	2 iodo TMT-6plex var	_TLHQAGC(io)AGVAC(io)R_	GSBRNA2T00143088001	beta-D-xylosidase 1 [Brassica oleracea var. oleracea]	3	649.026	-0.31871	0.00018215	91.961	1	7365.6	8370.4	4752.5	714.67	696.57	450.75	5470.4	6555.2	3991.3	835.09	849.48	555.89
4152	TLINQSLNWQHQLCK	15	iodo TMT-6plex var	_TLINQSLNWQHQLC(io)K_	GSBRNA2T00067661001	topless-related protein 2 [Brassica oleracea var. oleracea]	3	719.06	0.53318	7.369e-05	80.96	1	2229.4			503.92			1712.5			630.12
3047	TLLMCMGEALR	11	iodo TMT-6plex var	_TLLMC(io)MGEALR_	GSBRNA2T00037141001	sedoheptulose-1,7-bisphosphatase, chloroplastic-like [Brassica napus]	2	783.922	0.04633	6.1125e-15	198.81	1	11833	18106	34267	1182.2	1944.3	4799.6	11191	15482	30203	1642.2	2573.3	5265.8
4156	TLNVEHCR	8	iodo TMT-6plex var	_TLNVEHC(io)R_	GSBRNA2T00092893001	disease resistance protein TAO1-like [Brassica napus]	2	650.853	0.44337	0.016	73.248	2	504.67	1219.8		0	436.92		503.95	923.54		183.13	592.76
4202	TLPCEAPQCK	10	2 iodo TMT-6plex var	_TLPC(io)EAPQC(io)K_	GSBRNA2T00126443001	protein ASPARTIC PROTEASE IN GUARD CELL 2-like [Brassica napus]	3	583.325	0.30188	0.00015907	99.568	1	9970.1	5528.9	7659	538.64	353.98	352.92	7884.4	4656.4	6371.7	564.34	330.91	290.56
4215	TLQALQYIQENPDEVCPAGWK	21	iodo TMT-6plex var	_TLQALQYIQENPDEVC(io)PAGWK_	GSBRNA2T00111565001	2-Cys peroxiredoxin BAS1, chloroplastic-like [Brassica oleracea var. oleracea]	3	911.469	-0.13713	2.9566e-08	92.563	1	2543.4	1775.3	1220.1	206.14	155.49	304.55	2118.5	1548.3	1079.2	401.79	405.33	0
3077	TLQALQYIQENPDEVCPAGWKPGEK	25	iodo TMT-6plex var	_TLQALQYIQENPDEVC(io)PAGWKPGEK_	GSBRNA2T00111565001	2-Cys peroxiredoxin BAS1, chloroplastic-like [Brassica oleracea var. oleracea]	3	1048.54	-0.26925	2.603e-20	148.29	2	4489.4	7109.7	3922.9	841.21	697.66	615.88	3879.7	6016	2958.1	1079.3	1429.3	673.91
4218	TLQALQYIQENPDEVCPAGWQPGEK	25	iodo TMT-6plex var	_TLQALQYIQENPDEVC(io)PAGWQPGEK_	GSBRNA2T00111075001	2-Cys peroxiredoxin BAS1, chloroplastic-like isoform X2 [Brassica napus]	3	1048.53	-0.19959	5.0968e-42	170.68	2	4828.6	3210.5	2683.1	298.24	147.53	0	3665.9	2518.9	2609.8	602.24	297.8	223.49
4220	TLQALQYVQENPDEVCPAGWKPGEK	25	iodo TMT-6plex var	_TLQALQYVQENPDEVC(io)PAGWKPGEK_	GSBRNA2T00060633001	---	3	1043.87	0.25246	4.8923e-22	135.62	1	2748.3	2991.2	2301.4	0	0	0	2538.4	2364.3	2302.5	390.38	371.57	224.94
4247	TMIGNYEGTPCK	12	iodo TMT-6plex var	_TMIGNYEGTPC(io)K_	GSBRNA2T00134702001	beta-D-xylosidase 4 [Brassica oleracea var. oleracea]	2	821.91	0.6581	6.1355e-09	128.85	1	3685.1	4485.7		614.18	590.71		3036.1	3748.1		865.46	546.22
4312	TMNASECVSR	10	iodo TMT-6plex var	_TMNASEC(io)VSR_	GSBRNA2T00024636001	---	2	713.853	0.1304	8.0847e-05	122.18	1	7529.4	6819.9	1692.8	1204	1315.1	338.24	10818	10683	2530.4	2571.1	2353.1	626.59
4328	TNCNFDASGR	10	iodo TMT-6plex var	_TNC(io)NFDASGR_	GSBRNA2T00072673001	thaumatin-like protein 1 [Brassica rapa]	2	707.341	0.066105	0.0048861	71.558	1	9431.5			1216.7			3600.2			1985.5
3155	TNCQVNR	7	iodo TMT-6plex var	_TNC(io)QVNR_	GSBRNA2T00107378001	---	3	388.543	-1.1732	0.015478	64.757	1		7628.8	13177		2227.2	1729.8		7124.9	11772		2879	2143.8
3156	TNCVAPWYIK	10	iodo TMT-6plex var	_TNC(io)VAPWYIK_	GSBRNA2T00119707001	tropinone reductase homolog At5g06060-like [Brassica napus]	3	508.613	-0.97761	0.0033927	72.2	1	2275.5	1610	1656.8	943.91	650.78	684.66	2102.5	1720.8	1645.6	783.75	881.77	509.8
3171	TNLECDSYK	9	iodo TMT-6plex var	_TNLEC(io)DSYK_	GSBRNA2T00119980001	26S protease regulatory subunit 6A homolog [Brassica napus]	2	701.348	-0.099357	0.0024618	94.767	1	6299.3	11643	3846.1	803.88	2315.6	496.45	7867	13651	3612	975.3	2087.3	551.95
3183	TNNCFLVK	8	iodo TMT-6plex var	_TNNC(io)FLVK_	GSBRNA2T00137983001	60S ribosomal protein L28-1-like [Brassica napus]	2	634.355	-1.0428	0.041143	61.09	1	1281.4		2043.1	339.57		416.22	2063.5		3172.1	478.38		707.54
4311	TNPADEECK	9	iodo TMT-6plex var	_TNPADEEC(io)K_	GSBRNA2T00088488001	glyceraldehyde-3-phosphate dehydrogenase GAPB, chloroplastic [Brassica oleracea var. oleracea]	2	668.324	0.76052	0.00041568	115.78	2	8719.9	7923.4	13167	951.71	492.67	1235.9	6345.8	5839.5	8882.6	1120.1	849.12	1556.6
4402	TPSLLMPPSPVMCGGDWPLLR	21	iodo TMT-6plex var	_TPSLLMPPSPVMC(io)GGDWPLLR_	GSBRNA2T00075144001	coatomer subunit alpha-2-like [Brassica napus]	3	866.127	0.88404	1.2981e-08	83.423	1	1025.9	1234.7		588.89	618.4		1145	1180		581.59	705.79
3278	TPVQCYSDFMR	11	iodo TMT-6plex var	_TPVQC(io)YSDFMR_	GSBRNA2T00154891001	beta-amylase 1, chloroplastic-like [Brassica rapa]	3	559.276	-1.2321	0.010326	56.205	1	2385.9		1651	1502.6		1323.2	3815.3		3095	1923.2		1643.5
4491	TQETLEEGCQLIDK	14	iodo TMT-6plex var	_TQETLEEGC(io)QLIDK_	GSBRNA2T00046166001	succinate dehydrogenase [ubiquinone] flavoprotein subunit 1, mitochondrial isoform X3 [Brassica napus]	2	968.498	-0.46606	1.392e-15	159.18	1	1926.6	4019.5	1751.2	225.32	1105.9	568.79	2210.5	5029	1597	410.4	1460	725.94
4507	TQPSLSGLQGPTISPVYCK	19	iodo TMT-6plex var	_TQPSLSGLQGPTISPVYC(io)K_	GSBRNA2T00156148001	ATP phosphoribosyltransferase 2, chloroplastic [Brassica napus]	3	769.086	0.044003	0.0015414	51.225	1	1625.2			360.6			1390.4			474.85
4489	TSCAASLAVR	10	iodo TMT-6plex var	_TSC(io)AASLAVR_	GSBRNA2T00110926001	ATPase ASNA1 homolog 2-like [Brassica napus]	2	654.369	0.46168	0.0060871	70.056	1	7104.2	4455		1555.3	798.76		6919.9	4191.3		1865.1	1052
3340	TSCFNSR	7	iodo TMT-6plex var	_TSC(io)FNSR_	GSBRNA2T00144123001	protein TOC75-3, chloroplastic [Brassica napus]	3	381.864	-0.31446	0.030798	46.994	1			7307.1			1750.9			8688.9			2893.2
4619	TTALDVDESICK	12	iodo TMT-6plex var	_TTALDVDESIC(io)K_	GSBRNA2T00116696001	40S ribosomal protein S13-2-like [Brassica napus]	2	812.427	0.5252	2.7848e-27	212.09	1	4719.2	4939.5	3779.7	364.14	500.67	398.89	7044	7974.3	5158.3	876.73	813.68	526.4
3444	TTNCNSVK	8	iodo TMT-6plex var	_TTNC(io)NSVK_	GSBRNA2T00075382001	non-specific lipid-transfer protein D-like [Brassica napus]	2	598.319	-0.78323	0.0046173	100.71	1	8638.6	22262	7511.8	967.9	10291	1014.5	6791.8	21824	6739	794.48	10055	1187.2
4648	TTSQDVDESICK	12	iodo TMT-6plex var	_TTSQDVDESIC(io)K_	GSBRNA2T00155494001	40S ribosomal protein S13-2 [Brassica napus]	2	827.911	0.40731	5.7388e-27	213.38	1	3772.3	4169.8	1845.3	316.2	342.65	240.32	6320.8	6714.5	2736.1	597.14	659.79	374.76
3457	TTTYPAVCFR	10	iodo TMT-6plex var	_TTTYPAVC(io)FR_	GSBRNA2T00046055001	21 kDa protein-like [Brassica napus]	3	496.601	-0.23077	0.00017383	109.29	1	2114.7	4128.5	1911.3	1149.1	1938.9	943.94	8311	15055	9015.1	1485.3	2610.1	930.09
4728	TVDVSSVSDLFEFICSGPLVDK	22	iodo TMT-6plex var	_TVDVSSVSDLFEFIC(io)SGPLVDK_	GSBRNA2T00146270001	D-glycerate 3-kinase, chloroplastic-like [Brassica rapa]	3	896.133	0.70185	2.8982e-11	102.9	1	3038.4	2054.2	798.56	0	0	0	2039.1	1417.9	444.62	134.31	0	0
4701	TVFPAEACDDLGGEFCEPDYQK	22	2 iodo TMT-6plex var	_TVFPAEAC(io)DDLGGEFC(io)EPDYQK_	GSBRNA2T00109705001	light-regulated protein-like [Brassica napus]	3	1031.5	-0.54321	4.0988e-09	87.208	1	9142.8	6770.4	3409.1	631.85	475.75	0	7584.2	5516	3112.5	0	0	0
4746	TVGACLDR	8	iodo TMT-6plex var	_TVGAC(io)LDR_	GSBRNA2T00136396001	ferredoxin-dependent glutamate synthase 1, chloroplastic/mitochondrial [Brassica napus]	2	582.324	0.23801	0.0018477	119.86	1	27546	26738	25280	1861.4	2013.6	1548.9	20358	18240	18272	2139.9	2150.7	1401
4747	TVLPCNLVR	9	iodo TMT-6plex var	_TVLPC(io)NLVR_	GSBRNA2T00136042001	porphobilinogen deaminase, chloroplastic [Brassica napus]	2	672.405	-0.021427	0.00055504	111.46	1	4520.3	4791.3	5829.8	478.62	815.99	818.05	5846.5	7576.5	8381.2	1117.7	1443.8	1524.2
3548	TVQALLCR	8	iodo TMT-6plex var	_TVQALLC(io)R_	GSBRNA2T00082224001	atp4 (mitochondrion) [Brassica juncea]	2	616.871	-0.69921	0.0043992	101.6	1	5675.3	3711.1	4567.1	940.43	882.73	886.39	5009.6	3043.8	4104.2	1493.6	1242.7	1057.8
4828	TVQFVDWCPTGFK	13	iodo TMT-6plex var	_TVQFVDWC(io)PTGFK_	GSBRNA2T00154280001	tubulin alpha-3 chain-like [Brassica napus]	2	928.982	0.20128	2.9658e-10	148.04	1	5934.9	6438.8	4154.3	503.58	222.2	108.9	5643.3	4625.6	3557.6	483.8	130.15	713.32
3564	TVSLCVK	7	iodo TMT-6plex var	_TVSLC(io)VK_	GSBRNA2T00005645001	ferredoxin--NADP reductase, leaf isozyme 1, chloroplastic-like [Brassica napus]	2	539.828	-0.66753	0.0065124	101.69	2	10164	12050	7673	1077.5	1012.4	734.1	9624.2	11477	7049.5	1747.9	995.67	1209.7
3597	TVVSIPCGPSALAVK	15	iodo TMT-6plex var	_TVVSIPC(io)GPSALAVK_	GSBRNA2T00069603001	probable fructose-bisphosphate aldolase 3, chloroplastic [Brassica napus]	3	591.016	-0.30997	0.00012152	84.759	1	2381.9	1496.6	2150.7	635.04	617.76	352.5	1865.4	1705.8	1590.9	836.18	868.42	590.77
4883	TWCPYCSEVK	10	2 iodo TMT-6plex var	_TWC(io)PYC(io)SEVK_	GSBRNA2T00123160001	glutaredoxin-C5, chloroplastic-like [Brassica napus]	3	625.328	-0.68194	1.566e-05	134.57	1	7875	6910.3	7656	785.64	667.05	560.03	8399	6710.7	8437.2	301.69	896.64	353.62
4889	TWEGTDICNK	10	iodo TMT-6plex var	_TWEGTDIC(io)NK_	GSBRNA2T00091119001	leucine-rich repeat extensin-like protein 3 [Raphanus sativus]	2	748.374	-0.029502	9.5224e-05	116.52	1	4287.8			786.69			3602.6			1057.3
3639	TYCAEIAHNVSTK	13	iodo TMT-6plex var	_TYC(io)AEIAHNVSTK_	GSBRNA2T00151027001	60S ribosomal protein L32-1 [Brassica napus]	3	589.308	-0.42855	1.3907e-11	169.66	2	3194.2	1599.3	5096.2	315.35	215.98	432.42	4872.4	2508.1	8578.9	481.67	420.53	1067.3
4926	TYCLQYLEDFNEIHFFGDK	19	iodo TMT-6plex var	_TYC(io)LQYLEDFNEIHFFGDK_	GSBRNA2T00006090001	phosphomannomutase-like [Brassica napus]	4	678.581	-0.23416	3.2987e-10	107.72	1	1041	1278	916.34	183.32	292.18	121.7	942.72	1533.2	570.95	283.42	285.34	396.85
5027	VACETCTK	8	2 iodo TMT-6plex var	_VAC(io)ETC(io)TK_	GSBRNA2T00137491001	S-adenosylmethionine synthase 2 [Brassica napus]	3	504.947	-0.0063925	0.00025994	145.16	2	25402	18220	6918	2362.4	1442.2	628.56	31112	26227	8591.8	951.56	635.71	292.45
5028	VACGIIGLQG	10	iodo TMT-6plex var	_VAC(io)GIIGLQG_	GSBRNA2T00156205001	superoxide dismutase [Cu-Zn] 1 [Brassica napus]	2	630.371	0.27286	0.015061	60.478	1	2413	2679.6	2799.8	368.54	716.12	381.71	1990.3	2322.7	2361.5	570.84	857.45	594.76
4996	VACNLNDAACK	11	2 iodo TMT-6plex var	_VAC(io)NLNDAAC(io)K_	GSBRNA2T00110752001	---	3	593.992	0.54539	1.6954e-05	103.65	1	2774.3	2567.9		337.24	203.6		4007.9	2341.5		321.5	388.52
3734	VAGDGTTCATVLTQAILTEGCK	22	2 iodo TMT-6plex var	_VAGDGTTC(io)ATVLTQAILTEGC(io)K_	GSBRNA2T00137660001	chaperonin CPN60-like 2, mitochondrial [Brassica napus]	4	703.384	-0.80655	2.5836e-08	78.708	1	1265.8	1149.9	1084.8	0	202.18	0	1315.4	1151	1342.1	379.07	296.68	0
5003	VAHFCSMCGPK	11	2 iodo TMT-6plex var	_VAHFC(io)SMC(io)GPK_	GSBRNA2T00082082001	phosphomethylpyrimidine synthase, chloroplastic [Brassica napus]	4	460.246	-0.2308	0.0096042	52.903	1		8642			1616.9			16515			2104.2
5039	VALEACVQAR	10	iodo TMT-6plex var	_VALEAC(io)VQAR_	GSBRNA2T00108798001	ribulose 1,5-bisphosphate carboxylase/oxygenase large subunit (chloroplast) [Brassica juncea]	2	694.898	0.0189	3.7092e-12	191.4	6	91266	74275	80642	3960.2	4264.5	6255.5	74008	62035	68554	2493.2	2976.2	2576.9
5020	VAMSCEGCVGAVK	13	2 iodo TMT-6plex var	_VAMSC(io)EGC(io)VGAVK_	GSBRNA2T00110968001	copper transport protein ATX1 [Brassica napus]	3	638.012	0.013636	0.011901	47.815	1	2578	4304.3		267.38	551.03		2778.4	4225.3		569.67	760.69
3754	VAQLCVLAEDCNQPDYVK	18	2 iodo TMT-6plex var	_VAQLC(io)VLAEDC(io)NQPDYVK_	GSBRNA2T00103061001	40S ribosomal protein S12-2-like [Brassica napus]	3	889.473	-0.37661	4.3173e-07	100.04	1	3404.4	6674.5	4655.9	310.07	287.32	389.44	5012.9	9735.3	6378.7	379.97	273.46	0
3761	VAVICGYGDVGK	12	iodo TMT-6plex var	_VAVIC(io)GYGDVGK_	GSBRNA2T00025157001	adenosylhomocysteinase 1-like isoform X2 [Brassica napus]	2	755.418	-0.17213	0.00021909	105.65	1	4158.8	3232.6	3005.7	547.56	629.57	486.86	4847.7	4497.4	4433.8	858.55	1031.3	554.16
5067	VAYALAQGLSVIACVGETLEQR	22	iodo TMT-6plex var	_VAYALAQGLSVIAC(io)VGETLEQR_	GSBRNA2T00115207001	triosephosphate isomerase, cytosolic-like [Brassica napus]	3	874.149	0.62194	1.4297e-15	122.53	1	2913.8	2065.6	1864.4	0	0	0	3178.1	2615.5	2083.2	97.742	264.4	0
3766	VCENIPIVLCGNK	13	2 iodo TMT-6plex var	_VC(io)ENIPIVLC(io)GNK_	GSBRNA2T00148946001	26S protease regulatory subunit 8 homolog A-like [Brassica rapa]	4	515.799	-0.88437	3.127e-07	125.54	3	7455.9	6883.2	13435	1033.4	974.3	1897	10041	8407.6	18399	1029.2	997.74	1673.3
5042	VCGTIDIEK	9	iodo TMT-6plex var	_VC(io)GTIDIEK_	GSBRNA2T00107809001	magnesium-chelatase subunit ChlI-1, chloroplastic [Brassica napus]	3	436.246	-0.25679	0.00082173	97.965	1	3935.5	4530.3	3211	1166.8	1447.2	988.76	6345.1	6920.1	4489.6	1854.9	2816.1	2058.8
3769	VCHAHPTMSEALK	13	iodo TMT-6plex var	_VC(io)HAHPTMSEALK_	GSBRNA2T00156322001	dihydrolipoyl dehydrogenase 1, mitochondrial [Brassica rapa]	3	584.974	-0.68874	1.6318e-05	114.24	1		2000.8	1881.6		411.65	355.67		1521.5	1797.1		455.23	372.38
3771	VCLLGCGVPTGLGAVWNTAK	20	2 iodo TMT-6plex var	_VC(io)LLGC(io)GVPTGLGAVWNTAK_	GSBRNA2T00070996001	alcohol dehydrogenase class-3 [Brassica napus]	3	873.162	-0.17121	2.0205e-10	108.96	1	3718.1	3735.8	4243.9	245.58	220.25	114.87	3577.1	3280.9	3986.9	227.5	117.46	225.95
5076	VCMLGDAQHVEEAEK	15	iodo TMT-6plex var	_VC(io)MLGDAQHVEEAEK_	GSBRNA2T00045272001	60S ribosomal protein L10a-2-like [Brassica napus]	3	663.331	-0.16395	3.8443e-16	155.26	1	1266.9	1537.7		1315.9	1568.4		1620.5	2045.4		1301	1305.5
5049	VCPGAQLGINLVTSMMSHLLHHFVWTPPQGTK	32	iodo TMT-6plex var	_VC(io)PGAQLGINLVTSMMSHLLHHFVWTPPQGTK_	GSBRNA2T00019050001	cytochrome P450 98A3 [Brassica oleracea var. oleracea]	4	958.007	-0.10247	1.0948e-18	102.72	1		345.63			0			436.8			0
5051	VCPSHVLNFHPGDAFVVR	18	iodo TMT-6plex var	_VC(io)PSHVLNFHPGDAFVVR_	GSBRNA2T00143304001	beta carbonic anhydrase 2, chloroplastic-like [Brassica napus]	3	775.083	0.77143	8.4477e-13	122.16	2	4120.6	5437.4	4078.9	610.15	656.76	260.89	3880	5289.1	3271.3	813.62	1059.4	579.9
5053	VCPSHVLNFQPGDAFVVR	18	iodo TMT-6plex var	_VC(io)PSHVLNFQPGDAFVVR_	GSBRNA2T00041298001	beta carbonic anhydrase 1, chloroplastic-like [Raphanus sativus]	3	772.082	0.23635	3.7345e-16	131.45	3	4975.5	2816.6	1802.5	0	208.89	115.77	4404.3	2256.9	1633.4	461.92	340.4	416.36
5058	VCPSHVLNFQPGEAFVVR	18	iodo TMT-6plex var	_VC(io)PSHVLNFQPGEAFVVR_	GSBRNA2T00064132001	beta carbonic anhydrase 1, chloroplastic [Brassica napus]	2	1164.63	-0.74831	4.5283e-26	154.31	1	4520.3	7630.5	2894.1	692.32	259.14	115.08	3220.8	6013.4	2318.4	801.54	374.81	267.44
5059	VCQVIGAIVDVR	12	iodo TMT-6plex var	_VC(io)QVIGAIVDVR_	GSBRNA2T00080784001	ATP synthase subunit beta-1, mitochondrial [Raphanus sativus]	2	800.974	0.43502	9.3092e-08	117.93	1	2124.9	6411.1	4739.4	872.14	638.88	382	2025.7	5164.3	4159.3	660.43	697.26	522.56
5089	VCSELNVDGLR	11	iodo TMT-6plex var	_VC(io)SELNVDGLR_	GSBRNA2T00107809001	magnesium-chelatase subunit ChlI-1, chloroplastic [Brassica napus]	3	511.947	-0.18807	2.7473e-06	127.87	1	1911.9	3694.7	2135.9	1159.4	436.46	1202.8	2440	4897.5	2773.2	1566.5	590.01	1139.9
5090	VCTDLVR	7	iodo TMT-6plex var	_VC(io)TDLVR_	GSBRNA2T00110197001	40S ribosomal protein S20-1-like [Brassica napus]	2	567.829	-0.20168	0.0053567	100.37	1	10091	6879.6	7223.6	1106.1	1354.7	974.9	13018	8930.9	9553.1	1810.7	1548	1001.5
5092	VCVFLPEEVK	10	iodo TMT-6plex var	_VC(io)VFLPEEVK_	GSBRNA2T00156874001	---	3	497.953	-0.15967	0.0012815	82.029	1	3584.9	3827	2266.7	952.6	730.64	779.22	2988.9	2583.2	1831.7	1149.7	923.03	991.01
5069	VDCTQEADLCR	11	2 iodo TMT-6plex var	_VDC(io)TQEADLC(io)R_	GSBRNA2T00154605001	protein disulfide-isomerase 5-4-like [Brassica napus]	3	637.666	0.10019	0.0010523	73.082	1		5321.4			1157.8			7841.9			1421.3
5103	VEFYESDLLSYCR	13	iodo TMT-6plex var	_VEFYESDLLSYC(io)R_	GSBRNA2T00152915001	methionine S-methyltransferase [Brassica napus]	3	651.659	-0.10011	0.002177	65.043	1	2027.3			694.86			1932.6			745.33
3791	VEICHLK	7	iodo TMT-6plex var	_VEIC(io)HLK_	GSBRNA2T00102092001	glycerate dehydrogenase HPR, peroxisomal-like [Raphanus sativus]	2	585.847	-0.38094	0.03419	69.176	1	4934.9	3207.7	3232.1	885.78	722.09	425.81	4862.4	3774.6	3393.3	1148.8	1058.9	675.52
5081	VENIVVIGHSACGGIK	16	iodo TMT-6plex var	_VENIVVIGHSAC(io)GGIK_	GSBRNA2T00041298001	beta carbonic anhydrase 1, chloroplastic-like [Raphanus sativus]	2	963.046	-0.32018	1.0498e-13	129.38	1	3331.7	3339.4	4183.5	300.28	306.44	313.55	2472.6	2445.5	3514.1	367.98	382.84	574.13
5088	VETELSSVCEGILK	14	iodo TMT-6plex var	_VETELSSVC(io)EGILK_	GSBRNA2T00143515001	14-3-3-like protein GF14 lambda [Brassica napus]	3	612.671	0.31399	0.00029656	77.776	2		3242.6			1301.6			2903.8			1409.8
5125	VFQQALQGAIGTLNSCLSNELHLR	24	iodo TMT-6plex var	_VFQQALQGAIGTLNSC(io)LSNELHLR_	GSBRNA2T00015388001	ATP synthase CF0 subunit I (chloroplast) [Brassica juncea]	4	736.152	1.2296	1.3143e-34	157.59	2	6785.1	2652.3	3818.4	446.65	208.9	0	4888.8	1938.3	2955.2	739.16	374.47	325.3
5106	VFTMNLSAPFICEFFK	16	iodo TMT-6plex var	_VFTMNLSAPFIC(io)EFFK_	GSBRNA2T00072862001	adenosine kinase 1 [Brassica napus]	3	741.723	-0.14716	0.0009526	62.055	1	1095.2	1362.4		452.46	329		1769.5	1610.9		540.77	673.82
5109	VGGVVTNWALVSMNHDTQSCMDPNVMEAK	29	iodo TMT-6plex var	_VGGVVTNWALVSMNHDTQSC(io)MDPNVMEAK_	GSBRNA2T00072297001	thiamine thiazole synthase, chloroplastic-like [Brassica napus]	4	866.417	0.094744	6.2752e-05	50.029	1		578.39			289.58			828.98			522.71
5134	VGICELPFHPISSEEIGGVGGTCVIR	26	2 iodo TMT-6plex var	_VGIC(io)ELPFHPISSEEIGGVGGTC(io)VIR_	GSBRNA2T00154884001	glutathione reductase, cytosolic-like [Brassica napus]	5	666.365	-0.10224	1.5722e-07	76.237	2	4077.4	2052.9	2002.8	274.49	0	0	4333.2	2179.3	2019.7	738.43	133.32	345.51
5152	VHVCYYR	7	iodo TMT-6plex var	_VHVC(io)YYR_	GSBRNA2T00151765001	40S ribosomal protein S9-1 [Brassica napus]	2	634.842	0.38135	0.0031191	116.87	2	13771	11377	13519	2337.1	1420	2006.8	20484	15824	20042	2759.1	1504.3	2186.8
5155	VIACVGETLEQR	12	iodo TMT-6plex var	_VIAC(io)VGETLEQR_	GSBRNA2T00126364001	triosephosphate isomerase, cytosolic-like [Brassica napus]	3	549.641	-0.32243	1.1726e-09	140.24	1	3109.9	4850.4	5327.2	170.09	564.15	548.59	3188.5	5334.3	6038.4	537.23	1335.5	878.78
5134	VICVLYTSPTCGPCR	15	3 iodo TMT-6plex var	_VIC(io)VLYTSPTC(io)GPC(io)R_	GSBRNA2T00132779001	NADPH-dependent thioredoxin reductase 3 [Brassica rapa]	5	520.696	-0.43366	3.9184e-07	97.69	1	10138	13403	5766	524.8	919.77	231.13	6900.2	9468	4513.1	0	222.22	252.6
5136	VIETDPAEYCVVAPDTEIFCEGEPVK	26	2 iodo TMT-6plex var	_VIETDPAEYC(io)VVAPDTEIFC(io)EGEPVK_	GSBRNA2T00073226001	cell division control protein 48 homolog A [Brassica oleracea var. oleracea]	3	1171.26	-0.69159	0.00021114	48.597	1		1575.1			106.11			2001.4			0
5162	VIETDPAEYCVVAPDTEIFCEGEPVKR	27	2 iodo TMT-6plex var	_VIETDPAEYC(io)VVAPDTEIFC(io)EGEPVKR_	GSBRNA2T00073226001	cell division control protein 48 homolog A [Brassica oleracea var. oleracea]	5	734.381	0.41197	1.4209e-07	69.248	1	2325.1	1627.1	1736.8	0	244.71	241.85	3194.3	2589.5	2323.2	111.46	0	0
3843	VISELGDSAFEDQCGR	16	iodo TMT-6plex var	_VISELGDSAFEDQC(io)GR_	GSBRNA2T00064132001	beta carbonic anhydrase 1, chloroplastic [Brassica napus]	2	1028	-0.95613	8.5768e-43	258.42	2	13187	12978	13137	371.55	207.74	378.01	8884.1	8598	9074.6	510.11	497.27	270.47
3845	VISWSSAGTCGFR	13	iodo TMT-6plex var	_VISWSSAGTC(io)GFR_	GSBRNA2T00120302001	ribosomal protein S11 (chloroplast) [Camelina sativa]	3	567.298	-0.66577	0.020036	43.761	1			3355.5			812.76			4411.1			1243.5
5161	VLACFSNNLLR	11	iodo TMT-6plex var	_VLAC(io)FSNNLLR_	GSBRNA2T00156261001	UDP-D-apiose/UDP-D-xylose synthase 2-like [Brassica napus]	3	526.971	0.0042214	0.016571	50.354	1		1597			3052			2614.3			3293
5162	VLAEAESSAFEDQCGR	16	iodo TMT-6plex var	_VLAEAESSAFEDQC(io)GR_	GSBRNA2T00143304001	beta carbonic anhydrase 2, chloroplastic-like [Brassica napus]	3	681	-0.050841	9.5547e-19	147.12	2	7387.1	7463.4	5655.3	457.26	529.64	332.48	6826.8	6964.6	5486.7	644.56	976.02	356.52
3855	VLCTGEK	7	iodo TMT-6plex var	_VLC(io)TGEK_	GSBRNA2T00127069001	peptidyl-prolyl cis-trans isomerase CYP20-3, chloroplastic [Brassica oleracea var. oleracea]	2	539.81	-1.056	0.0026532	123.69	1	42660	25539	10442	3517.1	5293.2	595.64	38025	24806	9615.6	3512.7	6183.8	577.15
5166	VLDALFPSVLGGTCAIPGAFGCGK	24	2 iodo TMT-6plex var	_VLDALFPSVLGGTC(io)AIPGAFGC(io)GK_	GSBRNA2T00148037001	V-type proton ATPase catalytic subunit A-like [Brassica napus]	3	984.547	0.028206	1.0588e-14	109.85	1	3503.4	4566	4863.2	121.15	0	259.92	3468.6	3803.1	4339.8	0	125.84	0
5205	VLLQDFTGVPAVVDLACMR	19	iodo TMT-6plex var	_VLLQDFTGVPAVVDLAC(io)MR_	GSBRNA2T00130966001	---	3	792.771	0.7129	6.4834e-10	104.88	1	1534.2	1104.5	1260.5	230.04	399.44	327.77	1574.6	1352.1	1058.3	472.08	611.21	270.6
5184	VLPELSCPVSLFTYYNPILK	20	iodo TMT-6plex var	_VLPELSC(io)PVSLFTYYNPILK_	GSBRNA2T00129587001	tryptophan synthase alpha chain, chloroplastic-like [Brassica napus]	3	875.824	-0.016079	0.000176	58.123	1	934.86	1367.5	557.19	224.22	289.99	0	946.24	1262.5	411.75	405.21	697.56	232.04
5219	VLVVGNPCNTNALICLK	17	2 iodo TMT-6plex var	_VLVVGNPC(io)NTNALIC(io)LK_	GSBRNA2T00053211001	malate dehydrogenase [NADP], chloroplastic-like isoform X1 [Brassica napus]	4	608.109	0.072365	3.5797e-09	109.79	1	3918.6			226.48			3786.6			170.03
5197	VMLCIPQQTIEAAHAEICGSIFEK	24	2 iodo TMT-6plex var	_VMLC(io)IPQQTIEAAHAEIC(io)GSIFEK_	GSBRNA2T00145115001	protein TIC110, chloroplastic [Brassica oleracea var. oleracea]	5	658.756	0.036787	6.8255e-06	65.833	1	2230.7	2633.6		304.55	0		2421.3	3091.5		134.14	149.9
5226	VNGSLFDVAHMCGLSLK	17	iodo TMT-6plex var	_VNGSLFDVAHMC(io)GLSLK_	GSBRNA2T00047346001	---	3	707.378	-0.0046532	0.00015763	68.41	1	1452.4			473.32			1084			589.67
5227	VNHMVYDYCTDK	12	iodo TMT-6plex var	_VNHMVYDYC(io)TDK_	GSBRNA2T00082361001	probable xyloglucan endotransglucosylase/hydrolase protein 6 isoform X2 [Brassica napus]	3	606.29	0.25496	0.012609	51.726	1	1394.1			1524			1072.8			1668
5214	VNVYYNEASCGR	12	iodo TMT-6plex var	_VNVYYNEASC(io)GR_	GSBRNA2T00147464001	tubulin beta-1 chain [Erythranthe guttata]	2	852.422	0.69945	5.0734e-06	103.43	1		2542.2	2264.7		381.54	497.29		2243.7	1975.5		419.99	1107.5
3890	VPDVFYCLK	9	iodo TMT-6plex var	_VPDVFYC(io)LK_	GSBRNA2T00073054001	glutamate--glyoxylate aminotransferase 1 [Brassica napus]	2	706.894	0.16507	0.00959	76.17	1	5877.1	3633.6	3601.9	879.02	525.53	628.34	5202.1	3167.1	2812.3	1184.3	726.68	656.27
5220	VPFISEDLALECEGK	15	iodo TMT-6plex var	_VPFISEDLALEC(io)EGK_	GSBRNA2T00068650001	photosystem I reaction center subunit N, chloroplastic-like [Brassica napus]	3	660.35	0.52537	4.623e-13	132.08	2	3242.2	3569.1	3369.5	694.76	519.31	331.51	3107.8	2575.1	2714.7	905.07	854.42	438.7
5256	VQACTQEEVNK	11	iodo TMT-6plex var	_VQAC(io)TQEEVNK_	GSBRNA2T00012213001	NADP-dependent glyceraldehyde-3-phosphate dehydrogenase [Raphanus sativus]	3	526.61	-0.16628	0.00046256	86.463	1	8373			908.56			8455.4			992.69
5249	VSGSGLCSK	9	iodo TMT-6plex var	_VSGSGLC(io)SK_	GSBRNA2T00154935001	60S ribosomal protein L13a-2 [Brassica napus]	2	583.824	0.32669	0.022608	62.271	1		2813.3			606.12			3934.8			899.14
5259	VSTFGESHGGGVGCIIDGCPPR	22	2 iodo TMT-6plex var	_VSTFGESHGGGVGC(io)IIDGC(io)PPR_	GSBRNA2T00028132001	chorismate synthase, chloroplastic-like [Brassica rapa]	5	561.493	-0.48462	0.00028386	53.033	1	1592.3	3031.1	3772.6	210.25	307.86	311.6	2240.8	3095.4	4389.3	275.18	474.74	405.9
5284	VTDEHIYLVVNAGCR	15	iodo TMT-6plex var	_VTDEHIYLVVNAGC(io)R_	GSBRNA2T00047346001	---	4	505.273	-0.30752	4.1465e-12	133.16	2	9036.5	6811.2	7017.6	895.32	706.04	592.59	6597.8	5450.2	5043.3	1477.7	1426.4	641.02
5285	VTEGCGAYIAAK	12	iodo TMT-6plex var	_VTEGC(io)GAYIAAK_	GSBRNA2T00155432001	bifunctional L-3-cyanoalanine synthase/cysteine synthase C1, mitochondrial-like [Brassica napus]	2	756.408	0.35514	8.7935e-05	96.604	1	2224.6	3021.1		605.91	621.79		1871.3	2512.7		671.11	752.94
5286	VTGAFGFITSLISCYQLLPSRPK	23	iodo TMT-6plex var	_VTGAFGFITSLISC(io)YQLLPSRPK_	GSBRNA2T00101547001	peroxisomal membrane protein 11D-like [Brassica napus]	3	943.196	0.21069	2.634e-08	84.689	1	1542.7	1503.8	377.93	104.93	354.1	0	1524.1	1442.5	570.03	271.83	260.54	0
5289	VTIILECTSCVR	12	2 iodo TMT-6plex var	_VTIILEC(io)TSC(io)VR_	GSBRNA2T00055111001	ribosomal protein L33 (chloroplast) [Camelina sativa]	3	665.721	0.20033	1.3013e-05	103.44	2	9845	14035	4151.5	1279.9	1372	582.4	11177	15089	4732.3	889.95	1487	520.74
5269	VTNAGCCGIGR	11	2 iodo TMT-6plex var	_VTNAGC(io)C(io)GIGR_	GSBRNA2T00150758001	GDSL esterase/lipase At1g29670 [Brassica rapa]	3	570.317	0.13514	2.6548e-05	98.04	1		11792			621.29			10356			336.75
3931	VTVQGEVIEQSFGEEHLCFR	20	iodo TMT-6plex var	_VTVQGEVIEQSFGEEHLC(io)FR_	GSBRNA2T00084729001	---	4	659.839	-0.051133	7.6537e-08	90.718	1	1411.7	1033.2	1554.8	395.92	0	0	1600.2	1026.2	2034.3	395.71	121.79	406.03
5299	VVAECGNWR	9	iodo TMT-6plex var	_VVAEC(io)GNWR_	GSBRNA2T00148707001	NAD(P)H-quinone oxidoreductase subunit N, chloroplastic-like [Brassica napus]	2	681.861	-0.17213	0.031432	54.982	1	5461.7			750.47			4201.4			1219.3
5292	VVDSPCCLVTGEYGWTANMER	21	2 iodo TMT-6plex var	_VVDSPC(io)C(io)LVTGEYGWTANMER_	GSBRNA2T00060816001	HEAT SHOCK PROTEIN 81.4 [Arabidopsis thaliana]	4	747.875	0.28733	2.7378e-12	106.86	2	5459.4	5588	4925.8	351.46	252.16	289.02	8435.2	8668.4	7677.5	117.29	116.43	0
3958	VVIADCGQL	9	iodo TMT-6plex var	_VVIADC(io)GQL_	GSBRNA2T00087522001	peptidyl-prolyl cis-trans isomerase-like [Brassica napus]	2	623.855	-0.76218	0.0012334	109.71	1	3562.6	3851.7	4405.3	977.4	880.21	940.07	3941.3	3776.9	4542.7	1222.5	816.71	1252.8
5326	VVIADCGQLPMSEA	14	iodo TMT-6plex var	_VVIADC(io)GQLPMSEA_	GSBRNA2T00129908001	photosynthetic NDH subunit of lumenal location 5, chloroplastic [Brassica napus]	2	881.457	-0.074093	0.00091846	69.345	1	2312.1		2007.4	302.98		0	1715.3		1269.8	473.09		351.16
5303	VVIFGLPGAYTGVCSQQHVPSYK	23	iodo TMT-6plex var	_VVIFGLPGAYTGVC(io)SQQHVPSYK_	GSBRNA2T00120038001	peroxiredoxin-2F, mitochondrial [Brassica napus]	4	695.626	-0.24986	1.7517e-05	64.522	2	694.44	1641.7		463.83	1065.2		650.24	1820.4		382.65	1366.3
5331	VVLCSHLGR	9	iodo TMT-6plex var	_VVLC(io)SHLGR_	GSBRNA2T00146344001	phosphoglycerate kinase, cytosolic [Brassica napus]	3	438.262	-0.31908	0.039228	43.308	1	7101.6			4555.9			8614.3			4433.3
5307	VVLYFQPCGWFGSGR	15	iodo TMT-6plex var	_VVLYFQPC(io)GWFGSGR_	GSBRNA2T00125117001	---	3	682.359	0.026529	4.7624e-07	100.11	1		3084.8			507.52			2603.8			721.17
5311	VVSFVCWELFDEQTDEYK	18	iodo TMT-6plex var	_VVSFVC(io)WELFDEQTDEYK_	GSBRNA2T00155495001	transketolase-1, chloroplastic-like [Brassica napus]	3	856.084	0.3378	1.2431e-12	120.9	1	3665.7	2006.3	2290	355.02	257.85	232.87	2883.3	2173.5	1705.1	552.8	205.05	308.02
5340	VVSFVCWELFDEQTDEYKESVLPSGVSAR	29	iodo TMT-6plex var	_VVSFVC(io)WELFDEQTDEYKESVLPSGVSAR_	GSBRNA2T00155495001	transketolase-1, chloroplastic-like [Brassica napus]	4	912.958	0.055674	3.7718e-19	113.8	1	1082.9	1087.4		0	0		1053.4	960.12		127.85	0
5317	VVVVCGYGDVGK	12	iodo TMT-6plex var	_VVVVC(io)GYGDVGK_	GSBRNA2T00111266001	adenosylhomocysteinase 1 isoform X2 [Brassica napus]	2	762.426	-0.41309	0.007547	62.338	1		2459.2			491.42			2511.4			700.82
5319	VWFDGESPDEKYECEFNMPEDFGTVGAIR	29	iodo TMT-6plex var	_VWFDGESPDEKYEC(io)EFNMPEDFGTVGAIR_	GSBRNA2T00099128001	lipoxygenase 2, chloroplastic-like [Brassica napus]	4	924.926	0.32149	7.6136e-05	49.559	1		1712			413.96			1120			370.73
3971	VWNLSNCK	8	iodo TMT-6plex var	_VWNLSNC(io)K_	GSBRNA2T00083201001	rhomboid-like protein 14, mitochondrial isoform X2 [Brassica oleracea var. oleracea]	2	646.853	-0.81853	0.0038765	103.74	1			1651.9			382.29			2746.3			831.68
3983	WAMLGAAGCIIPEALNK	17	iodo TMT-6plex var	_WAMLGAAGC(io)IIPEALNK_	GSBRNA2T00145627001	chlorophyll a-b binding protein CP26, chloroplastic-like [Brassica napus]	2	1044.07	0.0049688	1.8145e-07	114.31	1	2124.9	3725.2	1415.8	437.83	404.23	308.73	1771.4	2053.2	961.05	466.87	569.96	274.09
5367	WAMLGALGCITPEVLQK	17	iodo TMT-6plex var	_WAMLGALGC(io)ITPEVLQK_	GSBRNA2T00078930001	chlorophyll a-b binding protein 13, chloroplastic [Brassica napus]	3	720.402	0.12439	9.5368e-07	93.909	2	3257.7	3049.8	4299.8	495.91	496.24	606.4	2434.5	2326.4	3306.4	559.23	601.7	562.97
3987	WAMLGALGCTFPEILSK	17	iodo TMT-6plex var	_WAMLGALGC(io)TFPEILSK_	GSBRNA2T00154986001	chlorophyll a-b binding protein 151, chloroplastic-like [Brassica napus]	2	1083.59	-0.57342	2.7996e-12	139	1	3751.6	4778.8	2902.8	529.4	763.53	496.49	3905.1	4228.7	2453.2	785.17	782.52	497.1
5347	WAMLGALGCVFPELLAR	17	iodo TMT-6plex var	_WAMLGALGC(io)VFPELLAR_	GSBRNA2T00141424001	---	2	1088.6	-1.3629	2.9125e-38	210.9	2	15332	15236	6289.4	1815.6	1875.2	664.31	12362	13965	5458.9	2358.1	2451.2	899.21
5350	WCDDYFYIK	9	iodo TMT-6plex var	_WC(io)DDYFYIK_	GSBRNA2T00064008001	coproporphyrinogen-III oxidase 1, chloroplastic [Brassica oleracea var. oleracea]	3	527.925	-0.013141	0.0023979	81.95	1	3660.8	2771	1587	583.7	551.05	226.4	4100.7	3206	1669.7	887.24	857.24	396.84
5385	WCSCNIFSTQDHAAAAIAR	19	2 iodo TMT-6plex var	_WC(io)SC(io)NIFSTQDHAAAAIAR_	GSBRNA2T00087145001	---	4	681.603	-0.0093032	2.278e-21	143.57	1	3056.4	5395.6	5346.4	285.28	449.44	500.73	4795	8388	8299.5	278.92	269.37	242.36
5386	WFCVESGK	8	iodo TMT-6plex var	_WFC(io)VESGK_	GSBRNA2T00068476001	haloalkane dehalogenase 2-like [Brassica napus]	3	428.892	-0.69476	0.03185	49.536	1	6907.4	6033.2		2105.3	1272.3		4983.5	3906.8		3055.7	1763.7
5364	WHVIMACR	8	iodo TMT-6plex var	_WHVIMAC(io)R_	GSBRNA2T00149450001	---	3	448.913	0.18599	0.012287	65.252	2	5709	12256		2563.8	5206.6		9777.6	20408		3850.4	7523.4
4006	WINLLVDQGCR	11	iodo TMT-6plex var	_WINLLVDQGC(io)R_	GSBRNA2T00102092001	glycerate dehydrogenase HPR, peroxisomal-like [Raphanus sativus]	2	823.456	0.085718	2.571e-08	169.65	1	6322.9	6382.4	5956.7	493.95	472.64	425.91	5395.9	5248.9	4778.9	831.36	638.12	510.27
5370	WIPCVEFELEHGFVYR	16	iodo TMT-6plex var	_WIPC(io)VEFELEHGFVYR_	GSBRNA2T00114447001	ribulose bisphosphate carboxylase small chain, chloroplastic [Brassica napus]	2	1177.1	-0.72969	1.23e-21	156.25	3	51453	38908	23997	2169.1	2073.4	1271.6	43607	33091	21212	2479.9	1899.6	1050
4015	WLLYGSQLCR	10	iodo TMT-6plex var	_WLLYGSQLC(io)R_	GSBRNA2T00146270001	D-glycerate 3-kinase, chloroplastic-like [Brassica rapa]	3	523.292	-0.56762	0.00017821	132.01	1	5050.7	13138	14620	238.63	857.28	850.46	3283.7	9669.4	10317	351.21	1317.5	1359.1
5392	WNVQAEIVHCR	11	iodo TMT-6plex var	_WNVQAEIVHC(io)R_	GSBRNA2T00149261001	photosystem I chlorophyll a/b-binding protein 2, chloroplastic-like [Brassica rapa]	3	561.97	-0.16332	3.127e-09	154.24	1	5758.3	5961	7406.7	738.49	364.17	718.72	3926.4	4263.7	6356.7	741.57	587.34	760.38
5394	WPGEVAAGSGDPLEDFCK	18	iodo TMT-6plex var	_WPGEVAAGSGDPLEDFC(io)K_	GSBRNA2T00088488001	glyceraldehyde-3-phosphate dehydrogenase GAPB, chloroplastic [Brassica oleracea var. oleracea]	3	736.36	0.62408	3.1989e-16	132.51	5	12653	12667	11131	595.43	686.92	270.2	8813.8	9973	8184.6	680.7	1146.6	863.29
5421	WRASSQSCVLR	11	iodo TMT-6plex var	_WRASSQSC(io)VLR_	GSBRNA2T00073798001	calcium-dependent lipid-binding family protein [Arabidopsis thaliana]	2	811.443	0.88352	0.013163	60.255	1	559.34	947.67	255.28	358.37	452.01	245.86	581.63	707.45	0	307.13	521.79	0
4025	WSPELAAACEVWK	13	iodo TMT-6plex var	_WSPELAAAC(io)EVWK_	GSBRNA2T00154096001	ribulose 1,5-bisphosphate carboxylase/oxygenase large subunit (chloroplast) [Brassica juncea]	2	909.974	0.056911	2.6977e-07	135.47	3	19957	35894	30755	852.57	921.18	1142.5	17499	28731	25343	334.11	316.55	657.34
5428	WTSSNQVLMEVACTR	15	iodo TMT-6plex var	_WTSSNQVLMEVAC(io)TR_	GSBRNA2T00106508001	annexin D1 [Brassica rapa]	3	685.35	0.21316	0.0014512	62.055	2	1351.1			0			1929.3			491.77
5407	WTVVPSQCVSSLETYYDK	18	iodo TMT-6plex var	_WTVVPSQC(io)VSSLETYYDK_	GSBRNA2T00035861001	acid phosphatase 1-like [Brassica napus]	3	812.077	0.83585	0.00023676	61.477	1	1379.7	1959.4		195.46	297.88		1199.3	1902.9		338.97	0
5411	WYDCVASHLAK	11	iodo TMT-6plex var	_WYDC(io)VASHLAK_	GSBRNA2T00078527001	elongation factor 1-beta 2-like [Brassica oleracea var. oleracea]	2	811.422	-0.041413	6.069e-05	100.88	1	1615.7	2339.1	3007.9	885.56	781.74	1529.7	2718.3	3543.8	4220.7	1304.7	601.53	1734.7
5443	YAAISQDSGLVPIVEPEIMLDGEHCIDR	28	iodo TMT-6plex var	_YAAISQDSGLVPIVEPEIMLDGEHC(io)IDR_	GSBRNA2T00108101001	probable fructose-bisphosphate aldolase 1, chloroplastic [Brassica oleracea var. oleracea]	4	850.684	0.33523	7.4002e-12	93.876	2	3471.7	808.9	1024.2	907.8	225.89	363.44	2440.7	810.54	1015.1	787.79	166.91	604.2
5421	YAGSSNWTVQEAAECVR	17	iodo TMT-6plex var	_YAGSSNWTVQEAAEC(io)VR_	GSBRNA2T00002461001	enoyl-[acyl-carrier-protein] reductase [NADH], chloroplastic [Brassica napus]	3	734.027	0.98818	1.8775e-08	107.5	1	2278.8	2148.4	2540.2	0	0	0	1610.9	1725.6	1653.9	205.98	347.87	236.14
5427	YAKPESGIGFPGALELVTECK	21	iodo TMT-6plex var	_YAKPESGIGFPGALELVTEC(io)K_	GSBRNA2T00073419001	NHL repeat-containing protein 2 isoform X2 [Brassica rapa]	4	635.342	-0.1061	2.4213e-06	71.853	2	2925.1	1686.3	1300.1	714.38	0	234.81	2876.3	1579	1307.4	806.6	305.97	314.07
5430	YAPVCVTMPTAK	12	iodo TMT-6plex var	_YAPVC(io)VTMPTAK_	GSBRNA2T00093856001	photosystem II 5 kDa protein, chloroplastic-like [Brassica napus]	2	805.436	0.18389	7.3485e-11	147.26	1	5872.9	3415	1898.4	1550.6	812.59	683.78	3538.9	2168.9	1526.4	1431.3	566.21	579.96
5457	YAQVCVTMPTAK	12	iodo TMT-6plex var	_YAQVC(io)VTMPTAK_	GSBRNA2T00033979001	photosystem II 5 kDa protein, chloroplastic [Brassica napus]	2	820.939	0.44301	4.183e-09	139.48	2	5721.9	4138.3	7293.1	1413.4	1392.9	1378.2	4980.9	3025.5	6289.4	1332.5	1389	1685.9
5458	YASEVYESECK	11	iodo TMT-6plex var	_YASEVYESEC(io)K_	GSBRNA2T00110989001	superoxide dismutase [Mn] 1, mitochondrial-like [Brassica napus]	2	818.89	0.50718	1.6336e-14	190.86	1	5310.2	3478.9	1658.7	356.98	278.69	0	4490.1	3672.4	1542.2	887.04	581.42	355.58
5439	YCDGASFTGDSEDQSSQLYYR	21	iodo TMT-6plex var	_YC(io)DGASFTGDSEDQSSQLYYR_	GSBRNA2T00052382001	pectin acetylesterase 3 [Brassica rapa]	3	907.736	0.39958	2.6849e-19	131.54	1		1192.7			383.54			1083.6			306.19
4054	YCGMFGVDPGSNVDCDK	17	2 iodo TMT-6plex var	_YC(io)GMFGVDPGSNVDC(io)DK_	GSBRNA2T00110662001	endochitinase CH25-like [Brassica napus]	4	617.047	-0.83622	1.5389e-06	93.909	1		1439.9	2655.8		389.65	1209.6		842.89	1307.6		712.08	1312.1
4056	YCGYDHIDSLVDDTVPK	17	iodo TMT-6plex var	_YC(io)GYDHIDSLVDDTVPK_	GSBRNA2T00130674001	glycine dehydrogenase (decarboxylating) 1, mitochondrial [Brassica rapa]	3	757.038	-0.69256	4.8776e-07	104.94	1	2981.4	1306.7	2307.7	723.63	123.44	0	2596	965.93	1853.1	669.32	274.42	230.04
4058	YCIVAGK	7	iodo TMT-6plex var	_YC(io)IVAGK_	GSBRNA2T00115742001	3-oxoacyl-[acyl-carrier-protein] synthase I, chloroplastic-like [Brassica napus]	3	361.546	-0.66719	0.016565	62.978	1	13481	10184	6403.8	2903.7	2949.4	1291.5	11131	9246.9	5021	3881.6	3992.6	1883.4
5466	YCVPNTSDADSSPDQSK	17	iodo TMT-6plex var	_YC(io)VPNTSDADSSPDQSK_	GSBRNA2T00016784001	probable glutamyl endopeptidase, chloroplastic isoform X1 [Brassica napus]	3	714.999	-0.014811	0.00084152	57.173	1	1107.5			495.44			1131.3			638.15
5460	YDYEECESEGANK	13	iodo TMT-6plex var	_YDYEEC(io)ESEGANK_	GSBRNA2T00042494001	phosphoglucomutase, chloroplastic [Brassica oleracea var. oleracea]	2	933.407	-0.48871	4.6025e-13	162.31	2	2289.8	3391.4		1257.1	99.114		2272.4	3286.3		1069.1	0
5481	YECVFDMPEDFGTVGAIR	18	iodo TMT-6plex var	_YEC(io)VFDMPEDFGTVGAIR_	GSBRNA2T00132137001	lipoxygenase 2, chloroplastic-like [Brassica napus]	3	793.383	-0.17313	8.4643e-13	116.06	1	1912.9	1465		246.44	336.46		984.55	787.47		323.77	381.69
4072	YFCEFCGK	8	2 iodo TMT-6plex var	_YFC(io)EFC(io)GK_	GSBRNA2T00155547001	60S ribosomal protein L37a-2 [Brassica napus]	3	552.288	-0.25402	0.00092821	116.25	1	5585	7096.7	5291.5	732.86	718.39	615.38	7745.1	10045	8615.8	799.74	890.09	425.86
5488	YFENWCQDENR	11	iodo TMT-6plex var	_YFENWC(io)QDENR_	GSBRNA2T00098834001	magnesium-protoporphyrin IX monomethyl ester [oxidative] cyclase, chloroplastic [Brassica rapa]	2	916.915	-0.065797	3.2259e-11	172.13	2	7882.7	3797.5		683.87	354.28		10125	5628.1		1278.4	603.54
5494	YFSPVYLFDEGSTISWIPCGR	21	iodo TMT-6plex var	_YFSPVYLFDEGSTISWIPC(io)GR_	GSBRNA2T00140086001	phosphoribulokinase, chloroplastic-like [Brassica napus]	2	1383.69	-0.20235	6.9157e-53	223.11	1	7374.9	6587.7	10199	261.96	347.68	596	6077.2	5511.8	8489.6	406.79	436.15	937.54
5500	YGANCGPEAVWFK	13	iodo TMT-6plex var	_YGANC(io)GPEAVWFK_	GSBRNA2T00028150001	chlorophyll a-b binding protein CP26, chloroplastic-like [Brassica napus]	3	590.966	0.73012	1.1728e-07	115.24	2	5927.9	5537.8	5312.4	846.77	899.1	924.95	4492.2	4015.2	3780.5	1011.1	1184.2	919.38
4087	YGLLCGADGLPHLIVNGDQR	20	iodo TMT-6plex var	_YGLLC(io)GADGLPHLIVNGDQR_	GSBRNA2T00037003001	photosystem I reaction center subunit III, chloroplastic-like [Brassica rapa]	3	814.104	-0.12235	2.2152e-05	67.644	2	2106.4	3602.1	3384.4	282.55	505.27	346.48	1861.5	2796.5	2356.2	439.21	572.46	501.59
5489	YGNLNIESECPK	12	iodo TMT-6plex var	_YGNLNIESEC(io)PK_	GSBRNA2T00084355001	glutathione S-transferase U19-like [Brassica napus]	3	565.957	-0.35297	0.023096	45.28	1		1043.3			699.61			1013.9			834.27
5490	YGRPLLGCTIK	11	iodo TMT-6plex var	_YGRPLLGC(io)TIK_	GSBRNA2T00154096001	ribulose 1,5-bisphosphate carboxylase/oxygenase large subunit (chloroplast) [Brassica juncea]	3	517.308	0.80619	4.9839e-05	97.779	1	17699	13426		1143.4	1365.2		15882	11825		1828.9	1788.3
5510	YGRPLLGCTIKPK	13	iodo TMT-6plex var	_YGRPLLGC(io)TIKPK_	GSBRNA2T00154096001	ribulose 1,5-bisphosphate carboxylase/oxygenase large subunit (chloroplast) [Brassica juncea]	3	592.357	0.35251	2.1513e-07	114.72	3	34459	24482	28162	3056.6	2807.2	9189.7	29934	21714	22913	3912.4	3306.9	9328.4
4092	YGSLIIATGCTASR	14	iodo TMT-6plex var	_YGSLIIATGC(io)TASR_	GSBRNA2T00056453001	monodehydroascorbate reductase, chloroplastic [Brassica oleracea var. oleracea]	3	581.32	-0.91952	0.00084893	70.889	1			2558.7			502.69			2070.5			600.72
5494	YHLLVCGTTPCMIR	14	2 iodo TMT-6plex var	_YHLLVC(io)GTTPC(io)MIR_	GSBRNA2T00151671001	NADH dehydrogenase [ubiquinone] flavoprotein 2, mitochondrial [Brassica napus]	3	755.753	0.36439	2.7357e-05	89.43	2	12788	7339.5	3024.6	1641.5	890.55	274.56	12190	6773.3	2552.6	2784	1079.3	471.03
5498	YIFTIDDDCFVAK	13	iodo TMT-6plex var	_YIFTIDDDC(io)FVAK_	GSBRNA2T00153635001	UDP-arabinopyranose mutase 1-like [Brassica rapa]	2	939.979	0.13634	0.0019404	69.03	1	2067.4	2188.5		626.63	351.64		1922.9	2066.2		726.47	567.89
5522	YKDHGFEILAFPCNQFGNQEPGSNEEIVQFACTR	34	2 iodo TMT-6plex var	_YKDHGFEILAFPC(io)NQFGNQEPGSNEEIVQFAC(io)TR_	GSBRNA2T00064278001	probable phospholipid hydroperoxide glutathione peroxidase 6, mitochondrial [Brassica napus]	4	1137.56	-0.60443	1.4573e-18	106.3	1	3515.2			0			4290.2			113.31
5529	YLGEAILAYPCK	12	iodo TMT-6plex var	_YLGEAILAYPC(io)K_	GSBRNA2T00038546001	defensin-like protein 205 [Brassica rapa]	2	835.463	0.16145	4.5232e-05	98.898	1	1252.8	1751.9	973.92	219.01	235	0	2539.3	2513.7	1929.8	208.51	317.07	198.56
5509	YLGEAILAYPCSESYCEAK	19	2 iodo TMT-6plex var	_YLGEAILAYPC(io)SESYC(io)EAK_	GSBRNA2T00005972001	defensin-like protein 205 [Brassica rapa]	3	923.473	0.57531	1.6869e-07	86.8	1	3284.9	2835.8	1275.6	1530.3	330.33	319.18	7350.6	5164.3	3024.7	1749.8	0	410.63
4111	YMACCLMYR	9	2 iodo TMT-6plex var	_YMAC(io)C(io)LMYR_	GSBRNA2T00042896001	Tubulin alpha chain [Morus notabilis]	3	604.645	-1.0335	6.5294e-05	152.34	1	26027	24463	24421	1952.1	2258.2	1971.3	25487	22675	24339	772.98	870.94	650.67
5524	YMVFACSDSR	10	iodo TMT-6plex var	_YMVFAC(io)SDSR_	GSBRNA2T00041298001	beta carbonic anhydrase 1, chloroplastic-like [Raphanus sativus]	2	754.365	-0.16613	7.0563e-12	187.41	3	20705	37748	18749	3697.1	6660.3	3338.2	16196	29874	14777	3306.4	6076.6	2823.3
5563	YSLFDPCK	8	iodo TMT-6plex var	_YSLFDPC(io)K_	GSBRNA2T00139757001	ADP,ATP carrier protein 2, chloroplastic-like [Brassica napus]	3	434.564	-1.0917	0.016229	61.679	1	3259.4	2018.7	1503.9	1846.8	1281.1	896	4296.8	4047.6	2717.8	2266.9	2225.8	1447.5
4130	YSNSDAVVYVGCGER	15	iodo TMT-6plex var	_YSNSDAVVYVGC(io)GER_	GSBRNA2T00058645001	---	2	974.475	-0.91045	0.0055997	59.709	1			948.92			303.03			989.6			333.19
4132	YTGDELCR	8	iodo TMT-6plex var	_YTGDELC(io)R_	GSBRNA2T00100911001	plant/protein (Protein of unknown function, DUF538) [Arabidopsis thaliana]	2	643.324	-0.21873	0.0035236	138.78	1	11126	8448.6	9021	1470.6	1050.5	993.52	15765	11948	13681	1803.2	1209.5	1092.4
5549	YVFYSIHNCDK	11	iodo TMT-6plex var	_YVFYSIHNC(io)DK_	GSBRNA2T00095749001	NAD(P)-binding Rossmann-fold superfamily protein [Arabidopsis thaliana]	3	573.29	-0.2974	0.0032259	66.267	1		2748			616.11			3071.6			896.97
5555	YWLCAATESSIK	12	iodo TMT-6plex var	_YWLC(io)AATESSIK_	GSBRNA2T00153908001	receptor for activated C kinase 1C-like [Brassica napus]	2	850.948	0.33837	0.00044195	81.92	1		2762.5			347.07			3573			486.31
5558	YWPSLSCGSPSSCHGGK	17	2 iodo TMT-6plex var	_YWPSLSC(io)GSPSSC(io)HGGK_	GSBRNA2T00029702001	ribonuclease 2 [Brassica oleracea var. oleracea]	5	483.046	-0.6229	4.8089e-05	74.141	1	4674.1	5617		840.49	1053.2		5021.8	5567.9		710.51	882.76
5588	YYCTVIDAPGHR	12	iodo TMT-6plex var	_YYC(io)TVIDAPGHR_	GSBRNA2T00148813001	elongation factor 1-alpha 1-like [Brassica napus]	2	862.443	-0.13474	3.7118e-08	127.56	1	6392.5	2654.1	3700.3	513.57	595.57	537.76	8646.4	3525.6	4856.3	755.64	747.42	765.35
5589	YYGGNEFIDMAETLCQK	17	iodo TMT-6plex var	_YYGGNEFIDMAETLC(io)QK_	GSBRNA2T00121621001	serine hydroxymethyltransferase 1, mitochondrial [Brassica oleracea var. oleracea]	2	1156.05	-0.5227	0.001569	56.339	1	1969.9			258.55			1681.3			333.37
5563	YYGGNEFIDQIENLCQSR	18	iodo TMT-6plex var	_YYGGNEFIDQIENLC(io)QSR_	GSBRNA2T00084232001	serine hydroxymethyltransferase 4 [Brassica oleracea var. oleracea]	3	826.736	0.23924	1.8229e-09	103.88	1	2014.6	1726.1	1430	0	0	0	2521.6	2147.8	1725.9	391.28	128.07	0
5594	YYGGNEYIDMAETLCQK	17	iodo TMT-6plex var	_YYGGNEYIDMAETLC(io)QK_	GSBRNA2T00131189001	serine hydroxymethyltransferase 1, mitochondrial-like [Brassica napus]	2	1164.05	-1.0655	5.3433e-21	166.64	2	7618.7	4228.3	3341.6	1060.6	556.09	532.2	5937.7	2890.5	2997.1	1464.7	639.92	600.19
5571	YYTGNFDQYCQTR	13	iodo TMT-6plex var	_YYTGNFDQYC(io)QTR_	GSBRNA2T00143202001	ABC transporter F family member 1-like [Brassica napus]	3	663.311	0.23251	0.0015625	66.989	1		2165.4			1114.3			3613.6			1138.5

## Sheet: Table S2
Table S2. Sulfenylated sites and proteins in all samples.
Protein accession	Gene name	Position	Amino acid	Subcellular localization	CK1	CK2	CK3	T1	T2	T3	Protein description
GSBRNA2T00000331001	BnaA05g27850D	1109	C	cytoplasm	0.133	0.072		0.276	0.134		---
GSBRNA2T00000331001	BnaA05g27850D	1112	C	cytoplasm	0.133	0.072		0.276	0.134		---
GSBRNA2T00000932001	BnaC08g11420D	83	C	chloroplast	0.457			0.49			---
GSBRNA2T00001301001	BnaA02g05160D	177	C	chloroplast			0.052				beta-glucosidase BoGH3B-like [Brassica napus]
GSBRNA2T00001301001	BnaA02g05160D	181	C	chloroplast			0.052				beta-glucosidase BoGH3B-like [Brassica napus]
GSBRNA2T00002240001	BnaC04g03220D	241	C	chloroplast				0.089	0.068		cysteine sulfinate desulfinase/cysteine desulfurase and related enzymes [Zea mays]
GSBRNA2T00002240001	BnaC04g03220D	254	C	chloroplast				0.089	0.068		cysteine sulfinate desulfinase/cysteine desulfurase and related enzymes [Zea mays]
GSBRNA2T00002261001	BnaC04g03050D	98	C	chloroplast	0.238			0.354			cysteine synthase, chloroplastic/chromoplastic-like [Brassica napus]
GSBRNA2T00002261001	BnaC04g03050D	112	C	chloroplast	0.129			0.059			cysteine synthase, chloroplastic/chromoplastic-like [Brassica napus]
GSBRNA2T00002261001	BnaC04g03050D	113	C	chloroplast	0.129			0.059			cysteine synthase, chloroplastic/chromoplastic-like [Brassica napus]
GSBRNA2T00002461001	BnaC07g04330D	196	C	chloroplast				0.151	0.247	0.16	enoyl-[acyl-carrier-protein] reductase [NADH], chloroplastic [Brassica napus]
GSBRNA2T00003541001	BnaC02g47680D	33	C	extracellular	0.243			0.397			defensin-like protein 1 [Brassica napus]
GSBRNA2T00003541001	BnaC02g47680D	44	C	extracellular	0.038						defensin-like protein 1 [Brassica napus]
GSBRNA2T00003541001	BnaC02g47680D	50	C	extracellular	0.038						defensin-like protein 1 [Brassica napus]
GSBRNA2T00003541001	BnaC02g47680D	54	C	extracellular	0.038						defensin-like protein 1 [Brassica napus]
GSBRNA2T00003760001	BnaCnng21010D	97	C	chloroplast			0.211			0.233	chlorophyll a-b binding protein, chloroplastic-like [Brassica napus]
GSBRNA2T00004245001	BnaC03g75370D	88	C	chloroplast	0.294			0.392			ferredoxin--NADP reductase, root isozyme 2, chloroplastic-like [Brassica napus]
GSBRNA2T00005618001	BnaA01g26230D	127	C	chloroplast	0.651	0.838	0.788	0.661	0.751	0.693	presequence protease 1, chloroplastic/mitochondrial [Brassica rapa]
GSBRNA2T00005618001	BnaA01g26230D	198	C	chloroplast	0.122	0.115	0.101	0.275	0.277	0.241	presequence protease 1, chloroplastic/mitochondrial [Brassica rapa]
GSBRNA2T00005645001	BnaA09g08030D	162	C	chloroplast	0.191	0.18	0.176	0.309	0.205	0.29	ferredoxin--NADP reductase, leaf isozyme 1, chloroplastic-like [Brassica napus]
GSBRNA2T00005645001	BnaA09g08030D	180	C	chloroplast	0.127	0.129	0.104	0.062	0.022	0.086	ferredoxin--NADP reductase, leaf isozyme 1, chloroplastic-like [Brassica napus]
GSBRNA2T00005645001	BnaA09g08030D	185	C	chloroplast	0.127	0.129	0.104	0.062	0.022	0.086	ferredoxin--NADP reductase, leaf isozyme 1, chloroplastic-like [Brassica napus]
GSBRNA2T00005645001	BnaA09g08030D	320	C	chloroplast	0.248	0.3	0.244	0.337	0.329	0.353	ferredoxin--NADP reductase, leaf isozyme 1, chloroplastic-like [Brassica napus]
GSBRNA2T00005689001	BnaA09g07680D	3	C	cytoskeleton	0.053						autophagy-related protein 101 [Brassica rapa]
GSBRNA2T00005689001	BnaA09g07680D	6	C	cytoskeleton	0.053						autophagy-related protein 101 [Brassica rapa]
GSBRNA2T00005972001	BnaAnng02700D	44	C	extracellular	0.293	0.119	0.123	0.23		0.207	defensin-like protein 205 [Brassica rapa]
GSBRNA2T00005972001	BnaAnng02700D	49	C	extracellular	0.293	0.119	0.123	0.23		0.207	defensin-like protein 205 [Brassica rapa]
GSBRNA2T00006090001	BnaC04g04500D	193	C	cytoplasm	0.279	0.198		0.413	0.278		phosphomannomutase-like [Brassica napus]
GSBRNA2T00006097001	BnaC04g04450D	225	C	chloroplast		0.674			0.831		peroxisomal membrane protein 11D-like isoform X2 [Brassica napus]
GSBRNA2T00006116001	BnaC04g04370D	39	C	mitochondria	0.349			0.48			histone deacetylase complex subunit SAP18 [Brassica napus]
GSBRNA2T00007549001	BnaC01g38510D	20	C	cytoplasm	0.243	0.157	0.327	0.307	0.158	0.388	probable mediator of RNA polymerase II transcription subunit 37c [Brassica napus]
GSBRNA2T00008028001	BnaCnng23600D	527	C	cytoplasm				0.29			phosphoglycerate kinase 1, chloroplastic-like [Brassica napus]
GSBRNA2T00008564001	BnaAnng35580D	10	C	nucleus	0.11	0.159	0.167	0.179	0.179	0.243	glycine-rich RNA-binding protein GRP1A isoform X1 [Brassica napus]
GSBRNA2T00008668001	BnaC01g41460D	152	C	chloroplast	0.1		0.093	0.131		0.102	thaumatin-like protein 1 [Brassica oleracea var. oleracea]
GSBRNA2T00008668001	BnaC01g41460D	160	C	chloroplast	0.1		0.093	0.131		0.102	thaumatin-like protein 1 [Brassica oleracea var. oleracea]
GSBRNA2T00008668001	BnaC01g41460D	219	C	chloroplast	0.031						thaumatin-like protein 1 [Brassica oleracea var. oleracea]
GSBRNA2T00008668001	BnaC01g41460D	230	C	chloroplast	0.031						thaumatin-like protein 1 [Brassica oleracea var. oleracea]
GSBRNA2T00008820001	BnaCnng70650D	100	C	chloroplast	0.168	0.203		0.176	0.22		15-cis-phytoene desaturase, chloroplastic/chromoplastic [Brassica napus]
GSBRNA2T00008820001	BnaCnng70650D	103	C	chloroplast	0.168	0.203		0.176	0.22		15-cis-phytoene desaturase, chloroplastic/chromoplastic [Brassica napus]
GSBRNA2T00008855001	BnaC05g08430D	61	C	chloroplast	0.118	0.098		0.227	0.167		ferredoxin-1, chloroplastic-like [Brassica napus]
GSBRNA2T00008855001	BnaC05g08430D	82	C	chloroplast	0.118	0.098		0.227	0.167		ferredoxin-1, chloroplastic-like [Brassica napus]
GSBRNA2T00009229001	BnaA05g19800D	286	C	chloroplast		0.583			0.626		glutamyl-tRNA reductase-binding protein, chloroplastic-like [Brassica napus]
GSBRNA2T00009509001	BnaA09g04160D	348	C	nucleus		0.319			0.326		glutamate--tRNA ligase, cytoplasmic [Brassica napus]
GSBRNA2T00009509001	BnaA09g04160D	349	C	nucleus		0.319			0.326		glutamate--tRNA ligase, cytoplasmic [Brassica napus]
GSBRNA2T00009904001	BnaA09g01910D	113	C	chloroplast	0.293	0.277	0.188	0.367	0.381	0.258	Ribosomal protein S21 family protein [Arabidopsis thaliana]
GSBRNA2T00010581001	BnaA09g52790D	32	C	extracellular	0.108	0.185	0.483	0.217	0.154	0.589	myrosinase-like [Brassica rapa]
GSBRNA2T00010581001	BnaA09g52790D	233	C	extracellular	0.23	0.229	0.248	0.358	0.278	0.398	myrosinase-like [Brassica rapa]
GSBRNA2T00011113001	BnaC09g54000D	627	C	chloroplast	0.24	0.358		0.469	0.437		4-hydroxy-3-methylbut-2-en-1-yl diphosphate synthase (ferredoxin), chloroplastic-like isoform X2 [Brassica napus]
GSBRNA2T00011113001	BnaC09g54000D	639	C	chloroplast	0.182	0.175		0.12	0.124		4-hydroxy-3-methylbut-2-en-1-yl diphosphate synthase (ferredoxin), chloroplastic-like isoform X2 [Brassica napus]
GSBRNA2T00011113001	BnaC09g54000D	642	C	chloroplast	0.182	0.175		0.12	0.124		4-hydroxy-3-methylbut-2-en-1-yl diphosphate synthase (ferredoxin), chloroplastic-like isoform X2 [Brassica napus]
GSBRNA2T00011833001	BnaA10g30010D	236	C	chloroplast		0.197			0.142		dicarboxylate transporter 1, chloroplastic [Brassica rapa]
GSBRNA2T00011833001	BnaA10g30010D	239	C	chloroplast		0.197			0.142		dicarboxylate transporter 1, chloroplastic [Brassica rapa]
GSBRNA2T00012213001	BnaC04g36640D	50	C	cytoplasm	0.194			0.212			NADP-dependent glyceraldehyde-3-phosphate dehydrogenase [Raphanus sativus]
GSBRNA2T00012213001	BnaC04g36640D	412	C	cytoplasm	0.074			0.276			NADP-dependent glyceraldehyde-3-phosphate dehydrogenase [Raphanus sativus]
GSBRNA2T00012213001	BnaC04g36640D	422	C	cytoplasm	0.074			0.276			NADP-dependent glyceraldehyde-3-phosphate dehydrogenase [Raphanus sativus]
GSBRNA2T00012567001	BnaC04g05700D	217	C	chloroplast	0.333			1.07			ribulose bisphosphate carboxylase/oxygenase activase, chloroplastic-like isoform X1 [Brassica napus]
GSBRNA2T00013010001	BnaA02g09180D	115	C	chloroplast			0.134	0.122			trigger factor-like protein TIG, Chloroplastic [Brassica napus]
GSBRNA2T00013010001	BnaA02g09180D	118	C	chloroplast			0.134	0.122			trigger factor-like protein TIG, Chloroplastic [Brassica napus]
GSBRNA2T00013010001	BnaA02g09180D	350	C	chloroplast		0.315			0.487		trigger factor-like protein TIG, Chloroplastic [Brassica napus]
GSBRNA2T00013010001	BnaA02g09180D	387	C	chloroplast		0.536			0.6		trigger factor-like protein TIG, Chloroplastic [Brassica napus]
GSBRNA2T00014595001	BnaCnng27520D	97	C	cytoplasm		0.313			0.381		---
GSBRNA2T00014595001	BnaCnng27520D	119	C	cytoplasm		0.232			0.444		---
GSBRNA2T00014794001	BnaA10g28000D	178	C	chloroplast		0.11	0.118		0.082	0.085	protein TIC110, chloroplastic-like [Brassica napus]
GSBRNA2T00014794001	BnaA10g28000D	182	C	chloroplast		0.11	0.118		0.082	0.085	protein TIC110, chloroplastic-like [Brassica napus]
GSBRNA2T00014811001	BnaC02g48660D	325	C	cytoskeleton		0.412			0.665		transmembrane protein, putative (Protein of unknown function, DUF642) [Arabidopsis thaliana]
GSBRNA2T00015033001	BnaAnng37490D	63	C	mitochondria	0.271	0.325	0.456	0.498	0.404	0.385	60S ribosomal protein L18a-2-like [Brassica napus]
GSBRNA2T00015180001	BnaA08g25040D	133	C	chloroplast	0.188	0.205		0.113	0.075		aspartic proteinase A1-like [Brassica napus]
GSBRNA2T00015180001	BnaA08g25040D	139	C	chloroplast	0.188	0.205		0.113	0.075		aspartic proteinase A1-like [Brassica napus]
GSBRNA2T00015287001	BnaA01g33400D	154	C	cytoplasm	0.37		0.172	0.354		0.184	40S ribosomal protein S3a [Brassica napus]
GSBRNA2T00015287001	BnaA01g33400D	179	C	cytoplasm	0.39		0.293	0.387		0.418	40S ribosomal protein S3a [Brassica napus]
GSBRNA2T00015288001	BnaA01g33410D	203	C	chloroplast	0.269	0.225		0.268	0.322		probable ribose-5-phosphate isomerase 3, chloroplastic [Brassica rapa]
GSBRNA2T00015308001	BnaA01g33560D	305	C	chloroplast			0.327			0.147	rubisco accumulation factor 2, chloroplastic [Brassica rapa]
GSBRNA2T00015371001	BnaA01g34100D	99	C	cytoplasm	0.805	0.752		0.688	0.902		50S ribosomal protein L2P [Medicago truncatula]
GSBRNA2T00015388001	BnaA01g34180D	124	C	cytoplasm,nucleus	0.164	0.062		0.247	0.245	0.137	ATP synthase CF0 subunit I (chloroplast) [Brassica juncea]
GSBRNA2T00015395001	BnaA01g34210D	58	C	cytoplasm	0.175	0.144	0.162	0.171	0.288	0.285	ribosomal protein S2 (chloroplast) [Eutrema halophilum]
GSBRNA2T00015395001	BnaA01g34210D	226	C	cytoplasm	0.209	0.239		0.229	0.261		ribosomal protein S2 (chloroplast) [Eutrema halophilum]
GSBRNA2T00015976001	BnaC09g47630D	170	C	chloroplast	0.159	0.119		0.37	0.343		porphobilinogen deaminase, chloroplastic-like [Brassica napus]
GSBRNA2T00016001001	BnaC09g47440D	283	C	chloroplast	0.491	0.545		0.588	0.593		ribosomal RNA small subunit methyltransferase J [Arabidopsis thaliana]
GSBRNA2T00016333001	BnaA06g20630D	86	C	chloroplast		0.194			0.113		bundle-sheath defective protein 2 family [Arabidopsis lyrata subsp. lyrata]
GSBRNA2T00016333001	BnaA06g20630D	89	C	chloroplast		0.194			0.113		bundle-sheath defective protein 2 family [Arabidopsis lyrata subsp. lyrata]
GSBRNA2T00016543001	BnaAnng37640D	134	C	cytoplasm		0.127	0.062		0.289	0.207	glycine cleavage system H protein 3, mitochondrial-like [Raphanus sativus]
GSBRNA2T00016696001	BnaAnng13830D	169	C	chloroplast		0.657			0.858		rhodanese-like domain-containing protein 14, chloroplastic [Brassica napus]
GSBRNA2T00016784001	BnaC04g51960D	892	C	chloroplast	0.588			0.757			probable glutamyl endopeptidase, chloroplastic isoform X1 [Brassica napus]
GSBRNA2T00016792001	BnaA05g34260D	60	C	cytoplasm	0.371	0.236		0.427	0.316		phosphoenolpyruvate carboxylase 2 [Brassica rapa]
GSBRNA2T00016792001	BnaA05g34260D	303	C	cytoplasm		0.2			0.368		phosphoenolpyruvate carboxylase 2 [Brassica rapa]
GSBRNA2T00016792001	BnaA05g34260D	417	C	cytoplasm	0.136	0.107		0.035	0.069		phosphoenolpyruvate carboxylase 2 [Brassica rapa]
GSBRNA2T00016792001	BnaA05g34260D	419	C	cytoplasm	0.136	0.107		0.035	0.069		phosphoenolpyruvate carboxylase 2 [Brassica rapa]
GSBRNA2T00016792001	BnaA05g34260D	546	C	cytoplasm		0.544			0.702		phosphoenolpyruvate carboxylase 2 [Brassica rapa]
GSBRNA2T00016792001	BnaA05g34260D	680	C	cytoplasm	0.416			0.416	0.168		phosphoenolpyruvate carboxylase 2 [Brassica rapa]
GSBRNA2T00017009001	BnaA04g29580D	30	C	chloroplast		0.249	0.128		0.288	0.159	---
GSBRNA2T00017009001	BnaA04g29580D	32	C	chloroplast		0.249	0.128		0.288	0.159	---
GSBRNA2T00017186001	BnaC06g43510D	209	C	chloroplast	0.451	0.453	0.194	0.476	0.489	0.459	probable fructokinase-6, chloroplastic [Brassica napus]
GSBRNA2T00017186001	BnaC06g43510D	300	C	chloroplast		0.203			0.363		probable fructokinase-6, chloroplastic [Brassica napus]
GSBRNA2T00018169001	BnaC01g35830D	212	C	cytoplasm	0.419			0.489			phospholipase D alpha 2 [Brassica napus]
GSBRNA2T00018242001	BnaC09g00220D	137	C	chloroplast	0.58	0.172	0.136	0.53	0.22	0.157	photosystem I reaction center subunit II-1, chloroplastic [Brassica oleracea var. oleracea]
GSBRNA2T00018506001	BnaA09g01470D	159	C	chloroplast	0.118	0.081	0.073	0.023	0.053		cytochrome b6-f complex iron-sulfur subunit, chloroplastic-like [Brassica napus]
GSBRNA2T00018506001	BnaA09g01470D	164	C	chloroplast	0.118	0.081	0.073	0.023	0.053		cytochrome b6-f complex iron-sulfur subunit, chloroplastic-like [Brassica napus]
GSBRNA2T00018506001	BnaA09g01470D	177	C	chloroplast	0.119	0.092	0.108	0.033	0.06	0.039	cytochrome b6-f complex iron-sulfur subunit, chloroplastic-like [Brassica napus]
GSBRNA2T00018506001	BnaA09g01470D	179	C	chloroplast	0.119	0.092	0.108	0.033	0.06	0.039	cytochrome b6-f complex iron-sulfur subunit, chloroplastic-like [Brassica napus]
GSBRNA2T00020989001	BnaCnng74890D	38	C	chloroplast		0.249			0.196		---
GSBRNA2T00020989001	BnaCnng74890D	44	C	chloroplast		0.249			0.196		---
GSBRNA2T00021171001	BnaA06g02530D	38	C	chloroplast		0.973			1.012		AP2/ERF and B3 domain-containing transcription factor At1g51120-like [Brassica oleracea var.oleracea]
GSBRNA2T00021277001	BnaA01g18450D	468	C	cytoplasm		0.106	0.108		0.238	0.342	pyruvate, phosphate dikinase 1, chloroplastic [Brassica rapa]
GSBRNA2T00021277001	BnaA01g18450D	469	C	cytoplasm		0.106	0.108		0.238	0.342	pyruvate, phosphate dikinase 1, chloroplastic [Brassica rapa]
GSBRNA2T00021277001	BnaA01g18450D	473	C	cytoplasm		0.106	0.108		0.238	0.342	pyruvate, phosphate dikinase 1, chloroplastic [Brassica rapa]
GSBRNA2T00021804001	BnaA08g13010D	88	C	cytoplasm		0.417	0.319		0.49	0.429	---
GSBRNA2T00022009001	BnaC04g49280D	95	C	chloroplast		0.313			0.38		---
GSBRNA2T00022009001	BnaC04g49280D	109	C	chloroplast		0.118			0.085		---
GSBRNA2T00022009001	BnaC04g49280D	110	C	chloroplast		0.118			0.085		---
GSBRNA2T00022017001	BnaC04g49360D	38	C	cytoplasm		0.653			0.736		probable thiocyanate methyltransferase 2 [Brassica napus]
GSBRNA2T00022131001	BnaC06g24660D	13	C	chloroplast	0.37	0.291	0.308	0.616	0.569	0.563	LOW QUALITY PROTEIN: putative 60S ribosomal protein L27a-1 [Tarenaya hassleriana]
GSBRNA2T00022681001	BnaAnng39360D	61	C	nucleus	0.329			0.485			DEAD-box ATP-dependent RNA helicase 56-like [Brassica napus]
GSBRNA2T00022681001	BnaAnng39360D	96	C	nucleus	0.791	0.904		1.096	0.954		DEAD-box ATP-dependent RNA helicase 56-like [Brassica napus]
GSBRNA2T00022681001	BnaAnng39360D	170	C	nucleus	0.333	0.571		0.54	0.659		DEAD-box ATP-dependent RNA helicase 56-like [Brassica napus]
GSBRNA2T00022754001	BnaA07g38790D	109	C	chloroplast		0.27	0.224		0.303	0.305	beta carbonic anhydrase 4-like isoform X1 [Brassica napus]
GSBRNA2T00022976001	BnaCnng75490D	17	C	nucleus	0.354	0.126		0.37	0.296		nitrilase 2-like [Brassica rapa]
GSBRNA2T00023699001	BnaCnng75920D	20	C	cytoplasm	0.081	0.196		0.087	0.126		S-adenosylmethionine synthase [Brassica napus]
GSBRNA2T00023699001	BnaCnng75920D	31	C	cytoplasm	0.081	0.196		0.087	0.126		S-adenosylmethionine synthase [Brassica napus]
GSBRNA2T00024636001	BnaA06g00870D	408	C	extracellular	0.218		0.261	0.465		0.483	---
GSBRNA2T00024636001	BnaA06g00870D	413	C	extracellular	0.172		0.299	0.22		0.329	---
GSBRNA2T00024636001	BnaA06g00870D	417	C	extracellular	0.172		0.299	0.22		0.329	---
GSBRNA2T00024656001	BnaA06g01050D	129	C	mitochondria	0.451	0.339	0.383	0.481	0.374	0.456	malate dehydrogenase 1, mitochondrial-like [Brassica napus]
GSBRNA2T00025155001	BnaC08g46760D	44	C	chloroplast		0.281		0.255	0.465	0.197	fructose-1,6-bisphosphatase, cytosolic [Brassica napus]
GSBRNA2T00025155001	BnaC08g46760D	48	C	chloroplast			0.492			0.522	fructose-1,6-bisphosphatase, cytosolic [Brassica napus]
GSBRNA2T00025157001	BnaC08g46780D	42	C	cytoplasm		0.379	0.451		0.549	0.664	adenosylhomocysteinase 1-like isoform X2 [Brassica napus]
GSBRNA2T00025157001	BnaC08g46780D	84	C	cytoplasm		0.133	0.159		0.084	0.086	adenosylhomocysteinase 1-like isoform X2 [Brassica napus]
GSBRNA2T00025157001	BnaC08g46780D	86	C	cytoplasm		0.133	0.159		0.084	0.086	adenosylhomocysteinase 1-like isoform X2 [Brassica napus]
GSBRNA2T00025157001	BnaC08g46780D	120	C	cytoplasm		0.13	0.112		0.174	0.222	adenosylhomocysteinase 1-like isoform X2 [Brassica napus]
GSBRNA2T00025157001	BnaC08g46780D	244	C	cytoplasm		0.156	0.192		0.223	0.24	adenosylhomocysteinase 1-like isoform X2 [Brassica napus]
GSBRNA2T00025157001	BnaC08g46780D	268	C	cytoplasm		0.294	0.23		0.457	0.261	adenosylhomocysteinase 1-like isoform X2 [Brassica napus]
GSBRNA2T00025604001	BnaA01g34990D	386	C	chloroplast		0.154			0.25		bifunctional aspartokinase/homoserine dehydrogenase 2, chloroplastic-like [Brassica napus]
GSBRNA2T00025604001	BnaA01g34990D	393	C	chloroplast		0.154			0.25		bifunctional aspartokinase/homoserine dehydrogenase 2, chloroplastic-like [Brassica napus]
GSBRNA2T00025724001	BnaA09g54020D	101	C	chloroplast		0.178	0.097		0.153	0.157	---
GSBRNA2T00025724001	BnaA09g54020D	290	C	chloroplast		0.113	0.096		0.144	0.128	---
GSBRNA2T00025724001	BnaA09g54020D	296	C	chloroplast		0.348	0.274		0.444	0.357	---
GSBRNA2T00027418001	BnaAnng40540D	67	C	extracellular	0.431	0.327	0.592	0.527	0.468	0.792	calnexin homolog 1-like [Brassica napus]
GSBRNA2T00027418001	BnaAnng40540D	266	C	extracellular	0.24	0.251	0.216	0.349	0.328	0.23	calnexin homolog 1-like [Brassica napus]
GSBRNA2T00027418001	BnaAnng40540D	272	C	extracellular	0.24	0.251	0.216	0.349	0.328	0.23	calnexin homolog 1-like [Brassica napus]
GSBRNA2T00028132001	BnaA05g36390D	70	C	chloroplast	0.195	0.135	0.14	0.255	0.244	0.183	chorismate synthase, chloroplastic-like [Brassica rapa]
GSBRNA2T00028132001	BnaA05g36390D	75	C	chloroplast	0.195	0.135	0.14	0.255	0.244	0.183	chorismate synthase, chloroplastic-like [Brassica rapa]
GSBRNA2T00028132001	BnaA05g36390D	380	C	chloroplast	0.371		0.411	0.526		0.516	chorismate synthase, chloroplastic-like [Brassica rapa]
GSBRNA2T00028150001	BnaC02g46810D	142	C	chloroplast	0.166			0.269			chlorophyll a-b binding protein CP26, chloroplastic-like [Brassica napus]
GSBRNA2T00028539001	BnaCnng36150D	191	C	chloroplast	0.243			0.279			---
GSBRNA2T00028785001	BnaC02g40260D	195	C	chloroplast	0.198						---
GSBRNA2T00028785001	BnaC02g40260D	299	C	chloroplast	0.149			0.192			---
GSBRNA2T00028785001	BnaC02g40260D	307	C	chloroplast	0.212			0.243			---
GSBRNA2T00028785001	BnaC02g40260D	318	C	chloroplast	0.212			0.423			---
GSBRNA2T00028785001	BnaC02g40260D	515	C	chloroplast	0.049			0.228			---
GSBRNA2T00028785001	BnaC02g40260D	536	C	chloroplast	0.049			0.228			---
GSBRNA2T00028785001	BnaC02g40260D	646	C	chloroplast	0.356			0.586			---
GSBRNA2T00028785001	BnaC02g40260D	673	C	chloroplast	0.401			0.558			---
GSBRNA2T00028855001	BnaC02g39800D	93	C	chloroplast		0.203			0.22		probable histone H2A.5 [Brassica oleracea var. oleracea]
GSBRNA2T00028951001	BnaC06g18340D	119	C	chloroplast	0.806	0.789	0.353	0.73	0.857	0.607	proline--tRNA ligase, cytoplasmic-like [Brassica napus]
GSBRNA2T00028951001	BnaC06g18340D	509	C	chloroplast	0.114	0.186	0.157	0.31	0.368	0.162	proline--tRNA ligase, cytoplasmic-like [Brassica napus]
GSBRNA2T00028951001	BnaC06g18340D	523	C	chloroplast	0.114	0.186	0.157	0.31	0.368	0.162	proline--tRNA ligase, cytoplasmic-like [Brassica napus]
GSBRNA2T00029595001	BnaCnng36310D	440	C	nucleus	0.301	0.302		0.419	0.448		Fanconi anemia group I protein-like [Brassica napus]
GSBRNA2T00029702001	BnaC04g55920D	126	C	extracellular	0.339	0.274		0.365	0.277		ribonuclease 2 [Brassica oleracea var. oleracea]
GSBRNA2T00029702001	BnaC04g55920D	132	C	extracellular	0.339	0.274		0.365	0.277		ribonuclease 2 [Brassica oleracea var. oleracea]
GSBRNA2T00030867001	BnaA02g26210D	33	C	extracellular		0.156			0.177		---
GSBRNA2T00031395001	BnaC07g33390D	162	C	cytoplasm	0.14	0.185		0.385	0.295		bifunctional epoxide hydrolase 2-like [Brassica napus]
GSBRNA2T00032392001	BnaCnng03650D	86	C	chloroplast	0.074	0.101	0.089		0.021	0.038	transmembrane protein [Arabidopsis thaliana]
GSBRNA2T00032392001	BnaCnng03650D	89	C	chloroplast	0.074	0.101	0.089		0.021	0.038	transmembrane protein [Arabidopsis thaliana]
GSBRNA2T00032503001	BnaC03g70690D	23	C	cytoplasm	0.22	0.197	0.203	0.178	0.211	0.171	nucleoside diphosphate kinase 1-like [Brassica napus]
GSBRNA2T00032675001	BnaC09g39750D	116	C	nucleus	0.383			0.65			B3 domain-containing protein At5g18000 [Brassica oleracea var. oleracea]
GSBRNA2T00033180001	BnaA07g10030D	52	C	nucleus	0.424	0.207	0.261	0.582	0.549	0.47	60S ribosomal protein L27a-2-like [Brassica oleracea var. oleracea]
GSBRNA2T00033208001	BnaA07g09790D	99	C	chloroplast				0.282	0.242	0.23	spermidine synthase 1-like [Brassica rapa]
GSBRNA2T00033208001	BnaA07g09790D	111	C	chloroplast				0.282	0.242	0.23	spermidine synthase 1-like [Brassica rapa]
GSBRNA2T00033208001	BnaA07g09790D	145	C	chloroplast	0.441	0.57	0.456	0.52	0.334	0.714	spermidine synthase 1-like [Brassica rapa]
GSBRNA2T00033625001	BnaA06g38600D	130	C	chloroplast			0.534			0.449	malate dehydrogenase, chloroplastic [Brassica napus]
GSBRNA2T00033979001	BnaAnng17550D	66	C	extracellular	0.5	0.438	0.389	0.522	0.475	0.447	photosystem II 5 kDa protein, chloroplastic [Brassica napus]
GSBRNA2T00034227001	BnaCnng38300D	125	C	chloroplast		0.508			0.664		---
GSBRNA2T00034729001	BnaC06g10950D	253	C	chloroplast		0.149	0.054		0.218	0.042	---
GSBRNA2T00034729001	BnaC06g10950D	254	C	chloroplast		0.149	0.054		0.218	0.042	---
GSBRNA2T00034927001	BnaA06g11610D	480	C	chloroplast	0.218	0.228	0.15	0.364	0.431	0.384	alanine aminotransferase 1, mitochondrial-like [Brassica napus]
GSBRNA2T00035009001	BnaA09g26590D	188	C	vacuolar membrane			0.153			0.189	---
GSBRNA2T00035009001	BnaA09g26590D	451	C	vacuolar membrane			0.114			0.008	---
GSBRNA2T00035009001	BnaA09g26590D	455	C	vacuolar membrane			0.114			0.008	---
GSBRNA2T00035009001	BnaA09g26590D	483	C	vacuolar membrane			0.067			0.21	---
GSBRNA2T00035359001	BnaC01g23800D	115	C	chloroplast	0.041	0.031			0.017		---
GSBRNA2T00035359001	BnaC01g23800D	138	C	chloroplast	0.09	0.15		0.122	0.173		---
GSBRNA2T00035428001	BnaA09g47140D	162	C	chloroplast	0.574						ATP-dependent Clp protease proteolytic subunit-related protein 2, chloroplastic-like [Brassica napus]
GSBRNA2T00035861001	BnaC03g77680D	73	C	chloroplast	0.251	0.215		0.435			acid phosphatase 1-like [Brassica napus]
GSBRNA2T00037003001	BnaA08g07940D	122	C	chloroplast	0.241	0.27	0.21	0.375	0.306	0.305	photosystem I reaction center subunit III, chloroplastic-like [Brassica rapa]
GSBRNA2T00037129001	BnaA09g35490D	541	C	plasma membrane	1.428	1.594	1.73	1.419	1.425	1.499	putative serine/threonine-protein kinase-like protein CCR3 [Brassica napus]
GSBRNA2T00037141001	BnaA09g35380D	99	C	chloroplast	0.272	0.26	0.255	0.304	0.309	0.291	sedoheptulose-1,7-bisphosphatase, chloroplastic-like [Brassica napus]
GSBRNA2T00037141001	BnaA09g35380D	116	C	chloroplast	0.062	0.122	0.062	0.068	0.044	0.045	sedoheptulose-1,7-bisphosphatase, chloroplastic-like [Brassica napus]
GSBRNA2T00037141001	BnaA09g35380D	121	C	chloroplast	0.062	0.122	0.062	0.068	0.044	0.045	sedoheptulose-1,7-bisphosphatase, chloroplastic-like [Brassica napus]
GSBRNA2T00037141001	BnaA09g35380D	150	C	chloroplast	0.046	0.076	0.13	0.147	0.126	0.141	sedoheptulose-1,7-bisphosphatase, chloroplastic-like [Brassica napus]
GSBRNA2T00037528001	BnaC03g77220D	332	C	nucleus	0.388	0.43		0.579	0.45		polyadenylate-binding protein 2-like [Brassica napus]
GSBRNA2T00038155001	BnaC04g51330D	8	C	chloroplast		0.782			0.591		probable glutamyl endopeptidase, chloroplastic isoform X1 [Brassica oleracea var. oleracea]
GSBRNA2T00038397001	BnaA09g27660D	62	C	plasma membrane	0.203	0.162	0.195	0.271	0.248	0.193	non-specific lipid transfer protein GPI-anchored 1-like [Brassica napus]
GSBRNA2T00038397001	BnaA09g27660D	63	C	plasma membrane	0.203	0.162	0.195	0.271	0.248	0.193	non-specific lipid transfer protein GPI-anchored 1-like [Brassica napus]
GSBRNA2T00038397001	BnaA09g27660D	76	C	plasma membrane		0.12	0.141		0.106	0.313	non-specific lipid transfer protein GPI-anchored 1-like [Brassica napus]
GSBRNA2T00038397001	BnaA09g27660D	78	C	plasma membrane		0.12	0.141		0.106	0.313	non-specific lipid transfer protein GPI-anchored 1-like [Brassica napus]
GSBRNA2T00038546001	BnaA05g31530D	44	C	extracellular	0.31	0.357		0.346	0.446	0.192	defensin-like protein 205 [Brassica rapa]
GSBRNA2T00038928001	BnaC05g44040D	116	C	extracellular	0.29	0.253		0.386	0.323		DNA-directed RNA polymerase subunit beta (Protein of unknown function, DUF642) [Arabidopsis thaliana]
GSBRNA2T00040054001	BnaC03g66560D	68	C	chloroplast	0.349	0.334		0.47	0.329		copper-transporting ATPase PAA1, chloroplastic-like [Brassica napus]
GSBRNA2T00040441001	BnaC02g36330D	235	C	cytoplasm	0.506			0.677			momilactone A synthase [Brassica napus]
GSBRNA2T00040460001	BnaC02g36240D	321	C	chloroplast		0.137			0.287		---
GSBRNA2T00040575001	BnaA06g19490D	111	C	chloroplast	0.42	0.536	0.731	0.718	0.545	0.667	peroxiredoxin Q, chloroplastic isoform X2 [Brassica napus]
GSBRNA2T00041142001	BnaA03g12470D	156	C	chloroplast		0.168			0.209		probable protein phosphatase 2C 76 [Brassica rapa]
GSBRNA2T00041142001	BnaA03g12470D	159	C	chloroplast		0.168			0.209		probable protein phosphatase 2C 76 [Brassica rapa]
GSBRNA2T00041298001	BnaCnng05580D	164	C	chloroplast	0.295	0.311	0.303	0.272	0.298	0.286	beta carbonic anhydrase 1, chloroplastic-like [Raphanus sativus]
GSBRNA2T00041298001	BnaCnng05580D	170	C	chloroplast		0.245	0.059	0.122	0.227	0.275	beta carbonic anhydrase 1, chloroplastic-like [Raphanus sativus]
GSBRNA2T00041298001	BnaCnng05580D	227	C	chloroplast	0.216	0.202	0.149	0.346	0.299	0.323	beta carbonic anhydrase 1, chloroplastic-like [Raphanus sativus]
GSBRNA2T00041298001	BnaCnng05580D	274	C	chloroplast	0.122	0.092	0.1	0.179	0.114	0.128	beta carbonic anhydrase 1, chloroplastic-like [Raphanus sativus]
GSBRNA2T00041597001	BnaA02g25720D	256	C	cytoplasm	0.633			0.643			farnesyl pyrophosphate synthase 2 [Brassica rapa]
GSBRNA2T00042494001	BnaCnng44490D	505	C	chloroplast	0.446	0.328		0.472	0.266		phosphoglucomutase, chloroplastic [Brassica oleracea var. oleracea]
GSBRNA2T00042896001	BnaA05g16010D	296	C	cytoplasm		0.159	0.15		0.073	0.046	Tubulin alpha chain [Morus notabilis]
GSBRNA2T00042896001	BnaA05g16010D	297	C	cytoplasm		0.159	0.15		0.073	0.046	Tubulin alpha chain [Morus notabilis]
GSBRNA2T00042896001	BnaA05g16010D	328	C	cytoplasm	0.145	0.151	0.093	0.241	0.255	0.21	Tubulin alpha chain [Morus notabilis]
GSBRNA2T00043643001	BnaA01g18880D	42	C	chloroplast			0.547			0.729	---
GSBRNA2T00043644001	BnaA01g18870D	116	C	chloroplast	0.149			0.193		0.171	ferredoxin-1-like [Brassica napus]
GSBRNA2T00043644001	BnaA01g18870D	124	C	chloroplast	0.149			0.193		0.171	ferredoxin-1-like [Brassica napus]
GSBRNA2T00044440001	BnaC05g28960D	148	C	chloroplast	0.185			0.233		0.418	UV-B-induced protein At3g17800, chloroplastic [Brassica rapa]
GSBRNA2T00044535001	BnaC01g40020D	237	C	cytoskeleton		0.075			0.201		---
GSBRNA2T00044535001	BnaC01g40020D	241	C	cytoskeleton		0.075			0.201		---
GSBRNA2T00044749001	BnaC05g36950D	298	C	extracellular	0.097	0.171	0.184	0.122	0.151	0.132	GDSL esterase/lipase APG-like [Brassica napus]
GSBRNA2T00044749001	BnaC05g36950D	299	C	extracellular	0.097	0.171	0.184	0.122	0.151	0.132	GDSL esterase/lipase APG-like [Brassica napus]
GSBRNA2T00044749001	BnaC05g36950D	311	C	extracellular	0.097	0.171	0.184	0.122	0.151	0.132	GDSL esterase/lipase APG-like [Brassica napus]
GSBRNA2T00044762001	BnaA03g49960D	96	C	vacuolar membrane			0.295			0.396	defensin-like protein 182 [Brassica napus]
GSBRNA2T00044762001	BnaA03g49960D	97	C	vacuolar membrane			0.295			0.396	defensin-like protein 182 [Brassica napus]
GSBRNA2T00044762001	BnaA03g49960D	101	C	vacuolar membrane			0.295			0.396	defensin-like protein 182 [Brassica napus]
GSBRNA2T00045117001	BnaA04g25190D	33	C	extracellular	0.098	0.116		0.15	0.142		defensin-like protein 197 [Brassica napus]
GSBRNA2T00045117001	BnaA04g25190D	46	C	extracellular	0.098	0.116		0.15	0.142		defensin-like protein 197 [Brassica napus]
GSBRNA2T00045117001	BnaA04g25190D	55	C	extracellular	0.127	0.153	0.108	0.102	0.087	0.101	defensin-like protein 197 [Brassica napus]
GSBRNA2T00045118001	BnaA04g25200D	81	C	chloroplast	0.115	0.102	0.112	0.055	0.067	0.124	peptidyl-prolyl cis-trans isomerase FKBP16-3, chloroplastic-like [Brassica rapa]
GSBRNA2T00045118001	BnaA04g25200D	85	C	chloroplast	0.115	0.102	0.112	0.055	0.067	0.124	peptidyl-prolyl cis-trans isomerase FKBP16-3, chloroplastic-like [Brassica rapa]
GSBRNA2T00045139001	BnaA04g25390D	95	C	chloroplast			0.132			0.24	---
GSBRNA2T00045139001	BnaA04g25390D	109	C	chloroplast			0.077			0.055	---
GSBRNA2T00045139001	BnaA04g25390D	110	C	chloroplast			0.077			0.055	---
GSBRNA2T00045150001	BnaA04g25470D	38	C	cytoplasm	0.619			0.607			---
GSBRNA2T00045170001	BnaA04g25660D	325	C	mitochondria	0.785			0.751			citrate synthase 4, mitochondrial-like [Brassica rapa]
GSBRNA2T00045170001	BnaA04g25660D	439	C	mitochondria	0.731			0.746			citrate synthase 4, mitochondrial-like [Brassica rapa]
GSBRNA2T00045232001	BnaA04g16190D	547	C	chloroplast		0.768			0.533		ruBisCO large subunit-binding protein subunit alpha, chloroplastic [Brassica rapa]
GSBRNA2T00045272001	BnaA04g15900D	128	C	nucleus	0.987	0.974		1.013	0.982		60S ribosomal protein L10a-2-like [Brassica napus]
GSBRNA2T00045275001	BnaA04g15880D	136	C	chloroplast		0.284			0.385		ferredoxin, root R-B2 [Brassica napus]
GSBRNA2T00045275001	BnaA04g15880D	144	C	chloroplast		0.284			0.385		ferredoxin, root R-B2 [Brassica napus]
GSBRNA2T00046055001	BnaA02g33370D	51	C	chloroplast	0.352	0.327	0.295	0.455	0.44	0.291	21 kDa protein-like [Brassica napus]
GSBRNA2T00046166001	BnaC07g16540D	124	C	mitochondria			0.347			0.384	succinate dehydrogenase [ubiquinone] flavoprotein subunit 1, mitochondrial isoform X3 [Brassica napus]
GSBRNA2T00046166001	BnaC07g16540D	519	C	mitochondria	0.296	0.381	0.49	0.419	0.503	0.625	succinate dehydrogenase [ubiquinone] flavoprotein subunit 1, mitochondrial isoform X3 [Brassica napus]
GSBRNA2T00047345001	BnaC08g15100D	38	C	cytoplasm	0.241	0.229	0.334	0.363	0.338	0.333	putative lactoylglutathione lyase [Brassica oleracea var. oleracea]
GSBRNA2T00047346001	BnaC08g15110D	89	C	chloroplast	0.526			0.655			---
GSBRNA2T00047346001	BnaC08g15110D	152	C	chloroplast	0.199		0.178	0.328		0.193	---
GSBRNA2T00047383001	BnaC08g15350D	137	C	extracellular		0.5			0.5		14 kDa proline-rich protein DC2.15-like [Brassica napus]
GSBRNA2T00047869001	BnaA10g13210D	347	C	vacuolar membrane	0.099	0.062		0.218	0.121	0.043	thiol protease aleurain-like [Brassica napus]
GSBRNA2T00047869001	BnaA10g13210D	352	C	vacuolar membrane	0.099	0.062		0.218	0.121	0.043	thiol protease aleurain-like [Brassica napus]
GSBRNA2T00048341001	BnaAnng21140D	107	C	cytoplasm	0.22			0.529	0.322		bifunctional enolase 2/transcriptional activator [Brassica napus]
GSBRNA2T00048341001	BnaAnng21140D	303	C	cytoplasm		0.383			0.717		bifunctional enolase 2/transcriptional activator [Brassica napus]
GSBRNA2T00048341001	BnaAnng21140D	331	C	cytoplasm	0.177	0.187		0.215	0.281		bifunctional enolase 2/transcriptional activator [Brassica napus]
GSBRNA2T00048583001	BnaA05g11730D	343	C	chloroplast		0.221		0.37			ATP-dependent zinc metalloprotease FTSH 2, chloroplastic [Brassica napus]
GSBRNA2T00048583001	BnaA05g11730D	517	C	chloroplast	0.074			0.058	0.054		ATP-dependent zinc metalloprotease FTSH 2, chloroplastic [Brassica napus]
GSBRNA2T00048790001	BnaC01g15060D	110	C	cytoplasm	0.802	0.832	0.682	0.786	0.786	0.623	cystine lyase CORI3-like [Brassica napus]
GSBRNA2T00048790001	BnaC01g15060D	350	C	cytoplasm	0.065	0.097	0.047	0.09	0.098	0.124	cystine lyase CORI3-like [Brassica napus]
GSBRNA2T00048790001	BnaC01g15060D	361	C	cytoplasm	0.065	0.097	0.047	0.09	0.098	0.124	cystine lyase CORI3-like [Brassica napus]
GSBRNA2T00048956001	BnaA03g46660D	85	C	cytoplasm	0.778	0.569	0.472	0.929	0.945	0.685	heat shock 70 kDa protein 6, chloroplastic-like [Brassica rapa]
GSBRNA2T00048956001	BnaA03g46660D	286	C	cytoplasm	0.046	0.266	0.197	0.283	0.293	0.192	heat shock 70 kDa protein 6, chloroplastic-like [Brassica rapa]
GSBRNA2T00049485001	BnaA09g39860D	74	C	chloroplast	0.146			0.112			calvin cycle protein CP12-2, chloroplastic [Brassica rapa]
GSBRNA2T00049485001	BnaA09g39860D	83	C	chloroplast	0.146			0.112			calvin cycle protein CP12-2, chloroplastic [Brassica rapa]
GSBRNA2T00049485001	BnaA09g39860D	116	C	chloroplast		0.207	0.627		0.206	0.541	calvin cycle protein CP12-2, chloroplastic [Brassica rapa]
GSBRNA2T00049485001	BnaA09g39860D	125	C	chloroplast	0.198	0.183	0.201	0.234	0.252	0.212	calvin cycle protein CP12-2, chloroplastic [Brassica rapa]
GSBRNA2T00049793001	BnaC06g30880D	639	C	chloroplast	0.547	0.537		0.631	0.551		alpha-amylase 3, chloroplastic [Brassica oleracea var. oleracea]
GSBRNA2T00050271001	BnaA05g08860D	573	C	chloroplast	0.24		0.144	0.308		0.239	bifunctional purine biosynthesis protein PurH-like isoform X1 [Brassica napus]
GSBRNA2T00050271001	BnaA05g08860D	574	C	chloroplast	0.24		0.144	0.308		0.239	bifunctional purine biosynthesis protein PurH-like isoform X1 [Brassica napus]
GSBRNA2T00050295001	BnaA05g08640D	250	C	chloroplast	0.178	0.049		0.196	0.106		endochitinase At2g43590 [Brassica rapa]
GSBRNA2T00050295001	BnaA05g08640D	263	C	chloroplast	0.178	0.049		0.196	0.106		endochitinase At2g43590 [Brassica rapa]
GSBRNA2T00050545001	BnaC09g13110D	337	C	chloroplast	0.32			0.396			elongation factor G, chloroplastic [Brassica napus]
GSBRNA2T00050545001	BnaC09g13110D	627	C	chloroplast	0.469			0.56			elongation factor G, chloroplastic [Brassica napus]
GSBRNA2T00050647001	BnaC07g15490D	179	C	cytoskeleton	0.182	0.188	0.118	0.291	0.392	0.362	V-type proton ATPase subunit B1-like [Brassica napus]
GSBRNA2T00050647001	BnaC07g15490D	265	C	cytoskeleton	0.356	0.464	0.486	0.465	0.551	0.562	V-type proton ATPase subunit B1-like [Brassica napus]
GSBRNA2T00050963001	BnaCnng49000D	322	C	chloroplast	0.681	0.609		0.767	0.871		geranylgeranyl diphosphate reductase, chloroplastic [Brassica napus]
GSBRNA2T00050963001	BnaCnng49000D	396	C	chloroplast	0.562	0.395		0.531	0.678		geranylgeranyl diphosphate reductase, chloroplastic [Brassica napus]
GSBRNA2T00051131001	BnaA10g29870D	615	C	chloroplast		0.483			0.595		GTP-binding protein TypA/BipA homolog [Brassica oleracea var. oleracea]
GSBRNA2T00051205001	BnaAnng21430D	176	C	cytoplasm	0.433			0.473			60S ribosomal protein L7a-1 [Brassica rapa]
GSBRNA2T00051250001	BnaA08g30040D	22	C	mitochondria		0.37			0.493		18 kDa seed maturation protein-like [Brassica napus]
GSBRNA2T00051635001	BnaA03g54590D	100	C	chloroplast	0.062	0.071	0.1	0.142	0.114	0.128	14 kDa proline-rich protein DC2.15-like [Brassica napus]
GSBRNA2T00051635001	BnaA03g54590D	102	C	chloroplast	0.062	0.071	0.1	0.142	0.114	0.128	14 kDa proline-rich protein DC2.15-like [Brassica napus]
GSBRNA2T00052382001	BnaC04g52030D	100	C	chloroplast		0.517			0.413		pectin acetylesterase 3 [Brassica rapa]
GSBRNA2T00052382001	BnaC04g52030D	222	C	chloroplast	0.513			0.534			pectin acetylesterase 3 [Brassica rapa]
GSBRNA2T00052382001	BnaC04g52030D	352	C	chloroplast	0.347	0.376		0.436	0.588		pectin acetylesterase 3 [Brassica rapa]
GSBRNA2T00052382001	BnaC04g52030D	356	C	chloroplast	0.347	0.376		0.436	0.588		pectin acetylesterase 3 [Brassica rapa]
GSBRNA2T00053211001	BnaA10g11990D	227	C	chloroplast	0.053			0.09			malate dehydrogenase [NADP], chloroplastic-like isoform X1 [Brassica napus]
GSBRNA2T00053211001	BnaA10g11990D	234	C	chloroplast	0.053			0.09			malate dehydrogenase [NADP], chloroplastic-like isoform X1 [Brassica napus]
GSBRNA2T00053211001	BnaA10g11990D	417	C	chloroplast				0.156			malate dehydrogenase [NADP], chloroplastic-like isoform X1 [Brassica napus]
GSBRNA2T00053211001	BnaA10g11990D	429	C	chloroplast				0.156			malate dehydrogenase [NADP], chloroplastic-like isoform X1 [Brassica napus]
GSBRNA2T00053446001	BnaA01g35060D	127	C	cytoplasm			0.531			0.675	plasma membrane-associated cation-binding protein 1 [Brassica rapa]
GSBRNA2T00053564001	BnaA06g39230D	104	C	chloroplast		0.112			0.121		thioredoxin reductase 2-like [Brassica napus]
GSBRNA2T00053564001	BnaA06g39230D	107	C	chloroplast		0.112			0.121		thioredoxin reductase 2-like [Brassica napus]
GSBRNA2T00053936001	BnaC04g08360D	20	C	cytoskeleton	0.069	0.113	0.148	0.035	0.036	0.016	S-adenosylmethionine synthase 3 [Brassica napus]
GSBRNA2T00053936001	BnaC04g08360D	31	C	cytoskeleton	0.069	0.113	0.148	0.035	0.036	0.016	S-adenosylmethionine synthase 3 [Brassica napus]
GSBRNA2T00053936001	BnaC04g08360D	42	C	cytoskeleton		0.381	0.266		0.34	0.242	S-adenosylmethionine synthase 3 [Brassica napus]
GSBRNA2T00053936001	BnaC04g08360D	45	C	cytoskeleton		0.381	0.266		0.34	0.242	S-adenosylmethionine synthase 3 [Brassica napus]
GSBRNA2T00053936001	BnaC04g08360D	90	C	cytoskeleton	0.35		0.623	0.694	0.344	0.624	S-adenosylmethionine synthase 3 [Brassica napus]
GSBRNA2T00054481001	BnaCnng51180D	59	C	chloroplast		0.183			0.258		---
GSBRNA2T00054544001	BnaC08g48810D	111	C	chloroplast	0.817	0.887	0.192	0.8	0.806	1.134	fructose-1,6-bisphosphatase, chloroplastic-like [Brassica napus]
GSBRNA2T00054544001	BnaC08g48810D	154	C	chloroplast	0.103	0.12	0.14	0.193	0.149	0.189	fructose-1,6-bisphosphatase, chloroplastic-like [Brassica napus]
GSBRNA2T00054544001	BnaC08g48810D	366	C	chloroplast	0.241	0.497	0.395	0.432	0.649	0.521	fructose-1,6-bisphosphatase, chloroplastic-like [Brassica napus]
GSBRNA2T00054823001	BnaC02g26090D	98	C	chloroplast	0.11		0.253	0.15		0.174	---
GSBRNA2T00054823001	BnaC02g26090D	99	C	chloroplast	0.11		0.253	0.15		0.174	---
GSBRNA2T00055111001	BnaC04g29430D	15	C	cytoplasm	0.192	0.164	0.233	0.161	0.195	0.209	ribosomal protein L33 (chloroplast) [Camelina sativa]
GSBRNA2T00055111001	BnaC04g29430D	18	C	cytoplasm	0.192	0.164	0.233	0.161	0.195	0.209	ribosomal protein L33 (chloroplast) [Camelina sativa]
GSBRNA2T00055111001	BnaC04g29430D	52	C	cytoplasm	0.239	0.309	0.179	0.218	0.312	0.245	ribosomal protein L33 (chloroplast) [Camelina sativa]
GSBRNA2T00055111001	BnaC04g29430D	55	C	cytoplasm	0.239	0.309	0.179	0.218	0.312	0.245	ribosomal protein L33 (chloroplast) [Camelina sativa]
GSBRNA2T00056453001	BnaA09g11300D	119	C	chloroplast		0.531			0.577		monodehydroascorbate reductase, chloroplastic [Brassica oleracea var. oleracea]
GSBRNA2T00056453001	BnaA09g11300D	174	C	chloroplast			0.351			0.419	monodehydroascorbate reductase, chloroplastic [Brassica oleracea var. oleracea]
GSBRNA2T00056516001	BnaC01g22030D	230	C	chloroplast		0.176			0.398		importin subunit alpha-2-like [Brassica napus]
GSBRNA2T00056523001	BnaC01g21970D	102	C	chloroplast	0.312	0.223	0.35	0.381	0.299	0.354	dihydrolipoyl dehydrogenase 2, chloroplastic [Brassica napus]
GSBRNA2T00056529001	BnaC01g21920D	240	C	vacuolar membrane		0.563			0.717		cysteine proteinase 15A-like [Brassica napus]
GSBRNA2T00057379001	BnaA09g47510D	137	C	cytoplasm	0.423	0.337		0.353	0.343		aminomethyltransferase, mitochondrial-like [Brassica napus]
GSBRNA2T00057379001	BnaA09g47510D	213	C	cytoplasm		0.196			0.396		aminomethyltransferase, mitochondrial-like [Brassica napus]
GSBRNA2T00057791001	BnaAnng23390D	425	C	chloroplast	0.134	0.035		0.215	0.125		sulfite reductase [ferredoxin], chloroplastic-like [Brassica napus]
GSBRNA2T00057791001	BnaAnng23390D	464	C	chloroplast	0.742			0.868			sulfite reductase [ferredoxin], chloroplastic-like [Brassica napus]
GSBRNA2T00058645001	BnaCnng53190D	248	C	cytoplasm			0.094				---
GSBRNA2T00058645001	BnaCnng53190D	256	C	cytoplasm			0.094				---
GSBRNA2T00058645001	BnaCnng53190D	279	C	cytoplasm			0.471			0.518	---
GSBRNA2T00058697001	BnaCnng53320D	189	C	extracellular	0.232	0.253		0.236	0.243		myrosinase-like isoform X1 [Brassica napus]
GSBRNA2T00058697001	BnaCnng53320D	224	C	extracellular	0.575	0.294		0.686	0.261		myrosinase-like isoform X1 [Brassica napus]
GSBRNA2T00058697001	BnaCnng53320D	452	C	extracellular	0.124	0.127		0.041	0.043		myrosinase-like isoform X1 [Brassica napus]
GSBRNA2T00058697001	BnaCnng53320D	456	C	extracellular	0.124	0.127		0.041	0.043		myrosinase-like isoform X1 [Brassica napus]
GSBRNA2T00058697001	BnaCnng53320D	484	C	extracellular	0.104	0.105		0.175	0.188		myrosinase-like isoform X1 [Brassica napus]
GSBRNA2T00058714001	BnaA04g27850D	107	C	chloroplast	0.193	0.248		0.252	0.29		serine carboxypeptidase-like 7 isoform X1 [Brassica rapa]
GSBRNA2T00058714001	BnaA04g27850D	108	C	chloroplast	0.193	0.248		0.252	0.29		serine carboxypeptidase-like 7 isoform X1 [Brassica rapa]
GSBRNA2T00058778001	BnaAnng23580D	56	C	cytoplasm	0.156			0.398			---
GSBRNA2T00058778001	BnaAnng23580D	278	C	cytoplasm	0.597			0.566			---
GSBRNA2T00059082001	BnaC02g09450D	172	C	nucleus		0.408		0.523	0.663		bifunctional nitrilase/nitrile hydratase NIT4 [Brassica napus]
GSBRNA2T00059649001	BnaAnng23670D	202	C	plasma membrane	0.305	0.489	0.3	0.443	0.551	0.406	ATPase 2, plasma membrane-type-like [Brassica napus]
GSBRNA2T00059649001	BnaAnng23670D	350	C	plasma membrane	0.322	0.303	0.342	0.503	0.39	0.399	ATPase 2, plasma membrane-type-like [Brassica napus]
GSBRNA2T00059783001	BnaA06g38290D	30	C	mitochondria	0.166	0.177		0.227	0.269		cytochrome b-c1 complex subunit 6-like [Brassica rapa]
GSBRNA2T00059783001	BnaA06g38290D	40	C	mitochondria	0.166	0.177		0.227	0.269		cytochrome b-c1 complex subunit 6-like [Brassica rapa]
GSBRNA2T00059783001	BnaA06g38290D	54	C	mitochondria	0.089	0.11	0.113	0.128	0.102	0.107	cytochrome b-c1 complex subunit 6-like [Brassica rapa]
GSBRNA2T00059783001	BnaA06g38290D	64	C	mitochondria	0.089	0.11	0.113	0.128	0.102	0.107	cytochrome b-c1 complex subunit 6-like [Brassica rapa]
GSBRNA2T00060617001	BnaC01g44920D	319	C	cytoplasm			0.3			0.646	T-complex protein 1 subunit eta-like [Brassica oleracea var. oleracea]
GSBRNA2T00060633001	BnaAnng24020D	132	C	nucleus				0.206		0.11	---
GSBRNA2T00060725001	BnaC03g13140D	379	C	chloroplast	1.028	1.066	1.548	0.972	0.934	1.397	U-box domain-containing protein 34-like [Brassica napus]
GSBRNA2T00060762001	BnaC03g13440D	260	C	chloroplast	0.087		0.313	0.195		0.362	chaperonin 60 subunit beta 3, chloroplastic-like [Brassica oleracea var. oleracea]
GSBRNA2T00060762001	BnaC03g13440D	266	C	chloroplast	0.087		0.313	0.195		0.362	chaperonin 60 subunit beta 3, chloroplastic-like [Brassica oleracea var. oleracea]
GSBRNA2T00060816001	BnaC03g13930D	494	C	cytoplasm	0.107	0.092	0.046	0.024	0.016	0.045	HEAT SHOCK PROTEIN 81.4 [Arabidopsis thaliana]
GSBRNA2T00060816001	BnaC03g13930D	495	C	cytoplasm	0.107	0.092	0.046	0.024	0.016	0.045	HEAT SHOCK PROTEIN 81.4 [Arabidopsis thaliana]
GSBRNA2T00061124001	BnaC03g60490D	20	C	cytoplasm		0.206		0.313	0.204	0.154	glycine-rich RNA-binding protein 10-like [Brassica napus]
GSBRNA2T00062209001	BnaA06g09830D	117	C	mitochondria	0.279	0.336	0.286	0.399	0.373	0.319	fruit protein pKIWI502-like [Brassica napus]
GSBRNA2T00062308001	BnaC06g06550D	229	C	cytoplasm		0.285	0.298		0.328	0.383	---
GSBRNA2T00062345001	BnaC06g06760D	212	C	extracellular		0.544	0.254		0.348	0.368	GDSL esterase/lipase At1g54020-like precursor [Brassica napus]
GSBRNA2T00062345001	BnaC06g06760D	226	C	extracellular	0.544			0.561			GDSL esterase/lipase At1g54020-like precursor [Brassica napus]
GSBRNA2T00063713001	BnaA09g08470D	233	C	extracellular	0.302			0.466			myrosinase-like [Brassica napus]
GSBRNA2T00063993001	BnaC08g45540D	105	C	chloroplast	0.13	0.141	0.026	0.082	0.044	0.076	thioredoxin M-type, chloroplastic-like [Brassica napus]
GSBRNA2T00063993001	BnaC08g45540D	108	C	chloroplast	0.13	0.141	0.026	0.082	0.044	0.076	thioredoxin M-type, chloroplastic-like [Brassica napus]
GSBRNA2T00064008001	BnaC08g45680D	56	C	nucleus	0.166	0.298	0.233	0.37	0.464	0.409	coproporphyrinogen-III oxidase 1, chloroplastic [Brassica oleracea var. oleracea]
GSBRNA2T00064008001	BnaC08g45680D	94	C	nucleus	0.732	1.057		0.722	0.795		coproporphyrinogen-III oxidase 1, chloroplastic [Brassica oleracea var. oleracea]
GSBRNA2T00064132001	BnaA05g33810D	171	C	chloroplast	0.096	0.069	0.129	0.223	0.129	0.06	beta carbonic anhydrase 1, chloroplastic [Brassica napus]
GSBRNA2T00064132001	BnaA05g33810D	275	C	chloroplast	0.138	0.068	0.099	0.173	0.083	0.077	beta carbonic anhydrase 1, chloroplastic [Brassica napus]
GSBRNA2T00064134001	BnaA05g33830D	252	C	chloroplast		0.551			0.742		peptidyl-prolyl cis-trans isomerase CYP38, chloroplastic [Brassica rapa]
GSBRNA2T00064278001	BnaCnng08430D	131	C	chloroplast	0.021			0.06	0.042		probable phospholipid hydroperoxide glutathione peroxidase 6, mitochondrial [Brassica napus]
GSBRNA2T00064278001	BnaCnng08430D	150	C	chloroplast	0.021			0.06	0.042		probable phospholipid hydroperoxide glutathione peroxidase 6, mitochondrial [Brassica napus]
GSBRNA2T00064606001	BnaA04g19620D	163	C	cytoplasm		0.371			0.622		---
GSBRNA2T00065209001	BnaC02g46570D	263	C	chloroplast	0.11			0.132	0.122		acetylornithine aminotransferase, chloroplastic/mitochondrial-like [Brassica oleracea var.oleracea]
GSBRNA2T00065209001	BnaC02g46570D	277	C	chloroplast	0.11			0.132	0.122		acetylornithine aminotransferase, chloroplastic/mitochondrial-like [Brassica oleracea var.oleracea]
GSBRNA2T00065464001	BnaA07g02200D	96	C	extracellular	0.391	0.184		0.479	0.206		cathepsin B-like cysteine proteinase isoform X2 [Brassica rapa]
GSBRNA2T00065813001	BnaC01g09980D	225	C	cytoplasm		1.018			1.108		26S proteasome non-ATPase regulatory subunit 2 homolog A-like [Brassica napus]
GSBRNA2T00066548001	BnaA07g28280D	49	C	chloroplast,mitochondria	0.613			0.652			60S ribosomal protein L10-3-like [Brassica napus]
GSBRNA2T00066548001	BnaA07g28280D	105	C	chloroplast,mitochondria	0.362	0.397		0.619	0.637		60S ribosomal protein L10-3-like [Brassica napus]
GSBRNA2T00066548001	BnaA07g28280D	126	C	chloroplast,mitochondria	0.239	0.262		0.308	0.355		60S ribosomal protein L10-3-like [Brassica napus]
GSBRNA2T00066638001	BnaC08g19950D	61	C	endoplasmic reticulum	0.201	0.14		0.239	0.254		protein disulfide isomerase-like 1-1 [Brassica napus]
GSBRNA2T00066638001	BnaC08g19950D	64	C	endoplasmic reticulum	0.201	0.14		0.239	0.254		protein disulfide isomerase-like 1-1 [Brassica napus]
GSBRNA2T00066689001	BnaA03g13290D	147	C	chloroplast		0.268	0.671		0.399	0.848	Transcriptional coactivator/pterin dehydratase [Arabidopsis thaliana]
GSBRNA2T00066856001	BnaAnng25180D	221	C	nucleus					0.217		2-Cys peroxiredoxin BAS1-like, chloroplastic [Brassica rapa]
GSBRNA2T00067279001	BnaA01g29420D	343	C	cytoplasm			0.348			0.404	---
GSBRNA2T00067280001	BnaA01g29410D	343	C	cytoplasm	0.337	0.367		0.425	0.332		peroxisomal (S)-2-hydroxy-acid oxidase GLO1-like isoform X1 [Brassica napus]
GSBRNA2T00067386001	BnaC09g21610D	323	C	chloroplast	1.183			1.274			dihydrolipoyllysine-residue acetyltransferase component 4 of pyruvate dehydrogenase complex,chloroplastic-like [Brassica oleracea var. oleracea]
GSBRNA2T00067401001	BnaA03g50050D	254	C	extracellular	0.628	0.693		0.367	0.398		---
GSBRNA2T00067661001	BnaA01g37020D	186	C	nucleus	0.397			0.497			topless-related protein 2 [Brassica oleracea var. oleracea]
GSBRNA2T00067818001	BnaC05g15180D	6	C	cytoplasm			0.446			0.631	glutathione S-transferase DHAR1, mitochondrial-like [Brassica napus]
GSBRNA2T00067818001	BnaC05g15180D	20	C	cytoplasm	0.32	0.435	0.349	0.681	0.648	0.56	glutathione S-transferase DHAR1, mitochondrial-like [Brassica napus]
GSBRNA2T00067876001	BnaAnng05460D	315	C	chloroplast	0.743		0.856	1.07		1.193	haloacid dehalogenase-like hydrolase domain-containing protein At3g48420 [Brassica napus]
GSBRNA2T00067886001	BnaAnng05560D	213	C	chloroplast		0.115			0.171		ATP-dependent Clp protease proteolytic subunit 4, chloroplastic-like [Brassica napus]
GSBRNA2T00068136001	BnaCnng09500D	213	C	chloroplast	0.11	0.137		0.207	0.187		haloacid dehalogenase-like hydrolase domain-containing protein At3g48420 [Brassica napus]
GSBRNA2T00068136001	BnaCnng09500D	255	C	chloroplast	0.197	0.257		0.347	0.192		haloacid dehalogenase-like hydrolase domain-containing protein At3g48420 [Brassica napus]
GSBRNA2T00068136001	BnaCnng09500D	275	C	chloroplast	0.602			0.581			haloacid dehalogenase-like hydrolase domain-containing protein At3g48420 [Brassica napus]
GSBRNA2T00068136001	BnaCnng09500D	311	C	chloroplast	0.212	0.301		0.336	0.299		haloacid dehalogenase-like hydrolase domain-containing protein At3g48420 [Brassica napus]
GSBRNA2T00068476001	BnaA04g07230D	125	C	chloroplast	0.494	0.392		0.717	0.544		haloalkane dehalogenase 2-like [Brassica napus]
GSBRNA2T00068476001	BnaA04g07230D	337	C	chloroplast			0.376			0.714	haloalkane dehalogenase 2-like [Brassica napus]
GSBRNA2T00068650001	BnaC02g42890D	124	C	chloroplast	0.08	0.084	0.135	0.162	0.13	0.148	photosystem I reaction center subunit N, chloroplastic-like [Brassica napus]
GSBRNA2T00068650001	BnaC02g42890D	133	C	chloroplast	0.022	0.103	0.048	0.163	0.238	0.205	photosystem I reaction center subunit N, chloroplastic-like [Brassica napus]
GSBRNA2T00068650001	BnaC02g42890D	153	C	chloroplast	0.35	0.155	0.125	0.455	0.352	0.254	photosystem I reaction center subunit N, chloroplastic-like [Brassica napus]
GSBRNA2T00068650001	BnaC02g42890D	161	C	chloroplast	0.196	0.235	0.166	0.255	0.295	0.153	photosystem I reaction center subunit N, chloroplastic-like [Brassica napus]
GSBRNA2T00068845001	BnaC06g40410D	266	C	cytoplasm	0.217	0.317		0.275	0.221		acetylornithine aminotransferase, chloroplastic/mitochondrial [Brassica oleracea var. oleracea]
GSBRNA2T00068845001	BnaC06g40410D	280	C	cytoplasm	0.217	0.317		0.275	0.221		acetylornithine aminotransferase, chloroplastic/mitochondrial [Brassica oleracea var. oleracea]
GSBRNA2T00069553001	BnaA10g27060D	417	C	cytoplasm	0.493	0.283	0.559	0.728	0.36	0.673	probable mediator of RNA polymerase II transcription subunit 37e [Raphanus sativus]
GSBRNA2T00069603001	BnaA02g27140D	70	C	chloroplast	0.374			0.547			probable fructose-bisphosphate aldolase 3, chloroplastic [Brassica napus]
GSBRNA2T00069603001	BnaA02g27140D	126	C	chloroplast	0.281	0.4		0.546	0.505		probable fructose-bisphosphate aldolase 3, chloroplastic [Brassica napus]
GSBRNA2T00069603001	BnaA02g27140D	185	C	chloroplast	0.444	0.527	0.301	0.585	0.741	0.504	probable fructose-bisphosphate aldolase 3, chloroplastic [Brassica napus]
GSBRNA2T00069636001	BnaA04g20940D	142	C	cytoplasm			0.546		0.186	0.291	elongation factor 2 [Brassica napus]
GSBRNA2T00069636001	BnaA04g20940D	246	C	cytoplasm		0.155			0.206		elongation factor 2 [Brassica napus]
GSBRNA2T00069636001	BnaA04g20940D	254	C	cytoplasm		0.126	0.205		0.241	0.368	elongation factor 2 [Brassica napus]
GSBRNA2T00069636001	BnaA04g20940D	265	C	cytoplasm		0.493			0.511	0.276	elongation factor 2 [Brassica napus]
GSBRNA2T00069636001	BnaA04g20940D	349	C	cytoplasm	0.39	0.307		0.528	0.546		elongation factor 2 [Brassica napus]
GSBRNA2T00069636001	BnaA04g20940D	427	C	cytoplasm		0.439	0.455				elongation factor 2 [Brassica napus]
GSBRNA2T00069636001	BnaA04g20940D	630	C	cytoplasm		0.352	0.483		0.595	0.533	elongation factor 2 [Brassica napus]
GSBRNA2T00069636001	BnaA04g20940D	657	C	cytoplasm		0.346			0.678		elongation factor 2 [Brassica napus]
GSBRNA2T00069645001	BnaA04g20850D	276	C	mitochondria	0.271			0.491			probable sucrose-phosphatase 2 [Brassica napus]
GSBRNA2T00070630001	BnaA09g13300D	270	C	cytoplasm						0.19	1-aminocyclopropane-1-carboxylate oxidase [Brassica napus]
GSBRNA2T00070910001	BnaA09g17390D	331	C	cytoplasm	0.266	0.247	0.269	0.43	0.357	0.38	2-oxoglutarate dehydrogenase, mitochondrial-like [Brassica napus]
GSBRNA2T00070910001	BnaA09g17390D	417	C	cytoplasm	0.483			0.78			2-oxoglutarate dehydrogenase, mitochondrial-like [Brassica napus]
GSBRNA2T00070915001	BnaA09g17360D	23	C	cytoplasm	0.183	0.222	0.207	0.183	0.29	0.207	nucleoside diphosphate kinase 1-like [Brassica rapa]
GSBRNA2T00070996001	BnaA09g16810D	10	C	cytoplasm		0.217	0.112		0.211	0.18	alcohol dehydrogenase class-3 [Brassica napus]
GSBRNA2T00070996001	BnaA09g16810D	173	C	cytoplasm		0.118	0.103		0.111	0.128	alcohol dehydrogenase class-3 [Brassica napus]
GSBRNA2T00070996001	BnaA09g16810D	177	C	cytoplasm		0.118	0.103		0.111	0.128	alcohol dehydrogenase class-3 [Brassica napus]
GSBRNA2T00070996001	BnaA09g16810D	373	C	cytoplasm		0.406	0.626		0.523	0.662	alcohol dehydrogenase class-3 [Brassica napus]
GSBRNA2T00071341001	BnaC06g14170D	68	C	peroxisome		0.275			0.344		probable monodehydroascorbate reductase, cytoplasmic isoform 3 [Brassica napus]
GSBRNA2T00071341001	BnaC06g14170D	69	C	peroxisome		0.275			0.344		probable monodehydroascorbate reductase, cytoplasmic isoform 3 [Brassica napus]
GSBRNA2T00071509001	BnaA03g53180D	223	C	peroxisome	0.253	0.272	0.239	0.462	0.395	0.356	catalase-2 [Brassica rapa]
GSBRNA2T00071654001	BnaAnng06200D	169	C	chloroplast	0.333	0.193	0.228	0.334	0.257	0.296	succinyl-CoA ligase [ADP-forming] subunit alpha-1, mitochondrial-like [Brassica napus]
GSBRNA2T00071654001	BnaAnng06200D	178	C	chloroplast	0.333	0.193	0.228	0.334	0.257	0.296	succinyl-CoA ligase [ADP-forming] subunit alpha-1, mitochondrial-like [Brassica napus]
GSBRNA2T00072297001	BnaA02g27980D	147	C	cytoplasm		0.522			0.942		thiamine thiazole synthase, chloroplastic-like [Brassica napus]
GSBRNA2T00072297001	BnaA02g27980D	162	C	cytoplasm	0.48	0.152	0.215	0.579	0.65	0.558	thiamine thiazole synthase, chloroplastic-like [Brassica napus]
GSBRNA2T00072343001	BnaC05g14950D	82	C	extracellular	0.177			0.168			pathogenesis-related protein 5-like [Brassica oleracea var. oleracea]
GSBRNA2T00072343001	BnaC05g14950D	92	C	extracellular		0.179			0.207		pathogenesis-related protein 5-like [Brassica oleracea var. oleracea]
GSBRNA2T00072343001	BnaC05g14950D	97	C	extracellular		0.179			0.207		pathogenesis-related protein 5-like [Brassica oleracea var. oleracea]
GSBRNA2T00072539001	BnaA09g38720D	437	C	chloroplast			0.107			0.243	---
GSBRNA2T00072539001	BnaA09g38720D	660	C	chloroplast			0.205			0.272	---
GSBRNA2T00072672001	BnaA01g12900D	91	C	chloroplast					0.135		glutamate--cysteine ligase, chloroplastic [Brassica napus]
GSBRNA2T00072672001	BnaA01g12900D	353	C	chloroplast		0.261					glutamate--cysteine ligase, chloroplastic [Brassica napus]
GSBRNA2T00072673001	BnaA01g12890D	80	C	vacuolar membrane	0.386			0.51			thaumatin-like protein 1 [Brassica rapa]
GSBRNA2T00072712001	BnaA01g12540D	175	C	chloroplast	0.51	0.583		0.484	0.463		PGR5-like protein 1A, chloroplastic [Brassica napus]
GSBRNA2T00072712001	BnaA01g12540D	297	C	chloroplast	0.119	0.096		0.084	0.098		PGR5-like protein 1A, chloroplastic [Brassica napus]
GSBRNA2T00072712001	BnaA01g12540D	300	C	chloroplast	0.119	0.096		0.084	0.098		PGR5-like protein 1A, chloroplastic [Brassica napus]
GSBRNA2T00072862001	BnaA01g32050D	143	C	cytoplasm				0.405			adenosine kinase 1 [Brassica napus]
GSBRNA2T00072862001	BnaA01g32050D	202	C	cytoplasm	0.469	0.331		0.561	0.678		adenosine kinase 1 [Brassica napus]
GSBRNA2T00072862001	BnaA01g32050D	323	C	cytoplasm		0.568			0.674		adenosine kinase 1 [Brassica napus]
GSBRNA2T00072862001	BnaA01g32050D	335	C	cytoplasm	0.424	0.606		0.461	0.721		adenosine kinase 1 [Brassica napus]
GSBRNA2T00072923001	BnaA01g31570D	425	C	chloroplast						0.529	---
GSBRNA2T00072923001	BnaA01g31570D	464	C	chloroplast			0.645			0.662	---
GSBRNA2T00073054001	BnaA08g20540D	15	C	cytoplasm	0.295	0.407	0.422	0.362	0.563	0.688	glutamate--glyoxylate aminotransferase 1 [Brassica napus]
GSBRNA2T00073054001	BnaA08g20540D	146	C	cytoplasm	0.233	0.163		0.197	0.216		glutamate--glyoxylate aminotransferase 1 [Brassica napus]
GSBRNA2T00073054001	BnaA08g20540D	223	C	cytoplasm	0.443	0.377	0.216	0.407	0.789	0.843	glutamate--glyoxylate aminotransferase 1 [Brassica napus]
GSBRNA2T00073054001	BnaA08g20540D	294	C	cytoplasm	0.224	0.229	0.234	0.293	0.308	0.287	glutamate--glyoxylate aminotransferase 1 [Brassica napus]
GSBRNA2T00073054001	BnaA08g20540D	374	C	cytoplasm	0.324	0.28	0.306	0.366	0.385	0.295	glutamate--glyoxylate aminotransferase 1 [Brassica napus]
GSBRNA2T00073054001	BnaA08g20540D	379	C	cytoplasm	0.51	0.47	0.323	0.473	0.477	0.525	glutamate--glyoxylate aminotransferase 1 [Brassica napus]
GSBRNA2T00073054001	BnaA08g20540D	414	C	cytoplasm	0.268	0.116	0.217	0.36	0.256	0.239	glutamate--glyoxylate aminotransferase 1 [Brassica napus]
GSBRNA2T00073060001	BnaA08g20600D	225	C	chloroplast	1.001			0.883			probable phosphoglucomutase, cytoplasmic 1 [Brassica napus]
GSBRNA2T00073060001	BnaA08g20600D	381	C	chloroplast	0.095			0.282			probable phosphoglucomutase, cytoplasmic 1 [Brassica napus]
GSBRNA2T00073060001	BnaA08g20600D	384	C	chloroplast	0.095			0.282			probable phosphoglucomutase, cytoplasmic 1 [Brassica napus]
GSBRNA2T00073226001	BnaC05g43180D	178	C	cytoplasm		0.129	0.169	0.059			cell division control protein 48 homolog A [Brassica oleracea var. oleracea]
GSBRNA2T00073226001	BnaC05g43180D	188	C	cytoplasm		0.129	0.169	0.059			cell division control protein 48 homolog A [Brassica oleracea var. oleracea]
GSBRNA2T00073226001	BnaC05g43180D	418	C	cytoplasm	0.108	0.118		0.128	0.103		cell division control protein 48 homolog A [Brassica oleracea var. oleracea]
GSBRNA2T00073226001	BnaC05g43180D	425	C	cytoplasm	0.108	0.118		0.128	0.103		cell division control protein 48 homolog A [Brassica oleracea var. oleracea]
GSBRNA2T00073226001	BnaC05g43180D	525	C	cytoplasm	0.579	0.448	0.646	0.674	0.532	0.764	cell division control protein 48 homolog A [Brassica oleracea var. oleracea]
GSBRNA2T00073281001	BnaC03g62580D	110	C	cytoplasm		0.461	0.449		0.705	0.371	aconitate hydratase 1-like [Brassica napus]
GSBRNA2T00073281001	BnaC03g62580D	829	C	cytoplasm		0.658			0.851		aconitate hydratase 1-like [Brassica napus]
GSBRNA2T00073419001	BnaA09g15360D	175	C	chloroplast	0.39		0.298	0.441	0.257	0.398	NHL repeat-containing protein 2 isoform X2 [Brassica rapa]
GSBRNA2T00073798001	BnaA08g03560D	1710	C	chloroplast	0.794	0.688	0.981	0.68	0.794		calcium-dependent lipid-binding family protein [Arabidopsis thaliana]
GSBRNA2T00073961001	BnaA01g05410D	9	C	nucleus	0.234	0.185	0.129	0.293	0.3	0.307	glycine-rich RNA-binding protein 10-like isoform X1 [Brassica napus]
GSBRNA2T00074279001	BnaA09g28510D	96	C	plasma membrane		0.145			0.219		3-ketoacyl-CoA synthase 5-like isoform X3 [Brassica napus]
GSBRNA2T00074279001	BnaA09g28510D	103	C	plasma membrane		0.145			0.219		3-ketoacyl-CoA synthase 5-like isoform X3 [Brassica napus]
GSBRNA2T00074323001	BnaC05g40770D	263	C	cytoplasm			0.253			0.17	bifunctional protein FolD 2 [Brassica napus]
GSBRNA2T00074656001	BnaA08g00390D	23	C	cytoplasm	0.206	0.204	0.21	0.212	0.193	0.222	nucleoside diphosphate kinase 1-like isoform X2 [Brassica napus]
GSBRNA2T00075144001	BnaC01g00490D	770	C	nucleus	0.705	0.662		0.696	0.755		coatomer subunit alpha-2-like [Brassica napus]
GSBRNA2T00075157001	BnaC01g00600D	106	C	chloroplast			0.391			0.423	photosynthetic NDH subunit of lumenal location 4, chloroplastic [Brassica oleracea var. oleracea]
GSBRNA2T00075360001	BnaC01g22710D	42	C	cytoplasm	0.631	0.393		0.575	0.521		cysteine synthase-like [Brassica napus]
GSBRNA2T00075382001	BnaAnng27610D	54	C	extracellular	0.121	0.079	0.119	0.103	0.058	0.046	non-specific lipid-transfer protein D-like [Brassica napus]
GSBRNA2T00075382001	BnaAnng27610D	55	C	extracellular	0.121	0.079	0.119	0.103	0.058	0.046	non-specific lipid-transfer protein D-like [Brassica napus]
GSBRNA2T00075382001	BnaAnng27610D	77	C	extracellular	0.237	0.209	0.252	0.262		0.342	non-specific lipid-transfer protein D-like [Brassica napus]
GSBRNA2T00075382001	BnaAnng27610D	100	C	extracellular	0.18	0.21	0.124	0.246	0.255	0.144	non-specific lipid-transfer protein D-like [Brassica napus]
GSBRNA2T00075382001	BnaAnng27610D	114	C	extracellular	0.413	0.639	0.607	0.351	0.624	0.621	non-specific lipid-transfer protein D-like [Brassica napus]
GSBRNA2T00075890001	BnaA03g12040D	153	C	chloroplast		0.311			0.477		UDP-glycosyltransferase 79B6 [Brassica rapa]
GSBRNA2T00075890001	BnaA03g12040D	161	C	chloroplast		0.617			0.663		UDP-glycosyltransferase 79B6 [Brassica rapa]
GSBRNA2T00076110001	BnaA05g32480D	244	C	cytoplasm	0.594	0.619		0.584	0.66		probable UTP--glucose-1-phosphate uridylyltransferase 2 [Brassica napus]
GSBRNA2T00076232001	BnaC08g04910D	375	C	chloroplast	0.507	0.273	0.266	0.396	0.321	0.446	triacylglycerol lipase-like 1 [Arabidopsis thaliana]
GSBRNA2T00076469001	BnaA01g30270D	23	C	mitochondria	0.071	0.173	0.082	0.225	0.213	0.22	30S ribosomal protein S10, chloroplastic-like [Brassica napus]
GSBRNA2T00076479001	BnaA01g30320D	172	C	chloroplast				0.317	0.073		phosphoglycerate kinase 1, chloroplastic-like [Brassica napus]
GSBRNA2T00076479001	BnaA01g30320D	291	C	chloroplast	0.603			0.573			phosphoglycerate kinase 1, chloroplastic-like [Brassica napus]
GSBRNA2T00076521001	BnaCnng59880D	51	C	chloroplast			0.792			1.221	---
GSBRNA2T00076633001	BnaC07g14870D	167	C	chloroplast					0.117		ferredoxin--NADP reductase, leaf isozyme 2, chloroplastic [Brassica napus]
GSBRNA2T00076633001	BnaC07g14870D	185	C	chloroplast	0.085	0.132	0.105	0.022	0.026	0.01	ferredoxin--NADP reductase, leaf isozyme 2, chloroplastic [Brassica napus]
GSBRNA2T00076633001	BnaC07g14870D	190	C	chloroplast	0.085	0.132	0.105	0.022	0.026	0.01	ferredoxin--NADP reductase, leaf isozyme 2, chloroplastic [Brassica napus]
GSBRNA2T00076925001	BnaC09g17480D	125	C	cytoplasm		0.392			0.467		---
GSBRNA2T00076925001	BnaC09g17480D	155	C	cytoplasm		0.185	0.18		0.218	0.254	---
GSBRNA2T00076925001	BnaC09g17480D	252	C	cytoplasm		0.238	0.188		0.332	0.284	---
GSBRNA2T00077191001	BnaA08g05070D	174	C	chloroplast	0.14	0.08		0.093	0.092		3-isopropylmalate dehydratase large subunit-like [Brassica napus]
GSBRNA2T00077191001	BnaA08g05070D	184	C	chloroplast	0.14	0.08		0.093	0.092		3-isopropylmalate dehydratase large subunit-like [Brassica napus]
GSBRNA2T00077191001	BnaA08g05070D	423	C	chloroplast	0.299	0.368		0.444	0.481		3-isopropylmalate dehydratase large subunit-like [Brassica napus]
GSBRNA2T00077191001	BnaA08g05070D	432	C	chloroplast	0.09	0.152			0.092		3-isopropylmalate dehydratase large subunit-like [Brassica napus]
GSBRNA2T00077191001	BnaA08g05070D	440	C	chloroplast	0.09	0.152			0.092		3-isopropylmalate dehydratase large subunit-like [Brassica napus]
GSBRNA2T00077191001	BnaA08g05070D	443	C	chloroplast	0.09	0.152			0.092		3-isopropylmalate dehydratase large subunit-like [Brassica napus]
GSBRNA2T00077191001	BnaA08g05070D	460	C	chloroplast	0.608	0.574	0.698	0.709	0.624	0.632	3-isopropylmalate dehydratase large subunit-like [Brassica napus]
GSBRNA2T00078010001	BnaA06g33230D	104	C	chloroplast	0.42	0.474	0.391	0.555	0.603	0.663	50S ribosomal protein L15, chloroplastic-like [Brassica napus]
GSBRNA2T00078527001	BnaC09g38180D	60	C	cytoplasm	0.543	0.43	0.583	0.8	0.331	0.661	elongation factor 1-beta 2-like [Brassica oleracea var. oleracea]
GSBRNA2T00078527001	BnaC09g38180D	154	C	cytoplasm	0.352	0.353	0.228	0.447	0.549	0.335	elongation factor 1-beta 2-like [Brassica oleracea var. oleracea]
GSBRNA2T00078767001	BnaA08g13340D	375	C	chloroplast	0.161			0.322			venom phosphodiesterase 2-like [Brassica rapa]
GSBRNA2T00078913001	BnaA08g14400D	21	C	nucleus		0.325			0.575		60S ribosomal protein L31-3-like [Brassica rapa]
GSBRNA2T00078930001	BnaA10g07350D	110	C	chloroplast	0.329	0.381	0.276	0.379	0.405	0.257	chlorophyll a-b binding protein 13, chloroplastic [Brassica napus]
GSBRNA2T00078939001	BnaA10g07270D	282	C	chloroplast	0.923			0.839			flavone 3'-O-methyltransferase 1-like [Brassica napus]
GSBRNA2T00078941001	BnaA10g07250D	109	C	chloroplast	0.277	0.334	0.366	0.439	0.449	0.386	flavone 3'-O-methyltransferase 1-like [Brassica napus]
GSBRNA2T00078997001	BnaA10g06850D	44	C	cytoplasm		0.443			0.504		cytochrome b5 [Brassica rapa]
GSBRNA2T00079010001	BnaA10g06770D	122	C	chloroplast	0.789	0.41	0.373	0.833	0.471	0.323	thylakoid lumenal 17.4 kDa protein, chloroplastic isoform X2 [Brassica napus]
GSBRNA2T00079156001	BnaC03g21220D	118	C	chloroplast	0.501			0.511			bifunctional monothiol glutaredoxin-S16, chloroplastic-like [Brassica napus]
GSBRNA2T00079156001	BnaC03g21220D	214	C	chloroplast	0.431	0.444		0.461	0.586		bifunctional monothiol glutaredoxin-S16, chloroplastic-like [Brassica napus]
GSBRNA2T00080479001	BnaA04g10240D	80	C	chloroplast	0.416	0.552		0.49	0.585		glutaredoxin-C2 [Brassica napus]
GSBRNA2T00080533001	BnaA04g09900D	57	C	chloroplast	0.206			0.327			ferredoxin-thioredoxin reductase catalytic chain, chloroplastic [Brassica napus]
GSBRNA2T00080533001	BnaA04g09900D	82	C	chloroplast	0.136	0.121	0.122	0.1	0.095	0.075	ferredoxin-thioredoxin reductase catalytic chain, chloroplastic [Brassica napus]
GSBRNA2T00080533001	BnaA04g09900D	84	C	chloroplast	0.136	0.121	0.122	0.1	0.095	0.075	ferredoxin-thioredoxin reductase catalytic chain, chloroplastic [Brassica napus]
GSBRNA2T00080533001	BnaA04g09900D	101	C	chloroplast	0.105	0.115	0.085	0.116	0.041	0.125	ferredoxin-thioredoxin reductase catalytic chain, chloroplastic [Brassica napus]
GSBRNA2T00080533001	BnaA04g09900D	103	C	chloroplast	0.105	0.115	0.085	0.116	0.041	0.125	ferredoxin-thioredoxin reductase catalytic chain, chloroplastic [Brassica napus]
GSBRNA2T00080643001	BnaA05g29390D	137	C	chloroplast	0.313		0.222	0.415		0.291	chlorophyll a-b binding protein CP29.2, chloroplastic [Brassica rapa]
GSBRNA2T00080700001	BnaA05g28850D	101	C	cytoplasm	0.422	0.446		0.623	0.685		60S ribosomal protein L4-1-like [Brassica oleracea var. oleracea]
GSBRNA2T00080700001	BnaA05g28850D	236	C	cytoplasm	0.499			0.747			60S ribosomal protein L4-1-like [Brassica oleracea var. oleracea]
GSBRNA2T00080761001	BnaC02g01240D	168	C	chloroplast	0.16			0.374			---
GSBRNA2T00080784001	BnaC02g01040D	84	C	mitochondria	0.388	0.236	0.156	0.359	0.281	0.213	ATP synthase subunit beta-1, mitochondrial [Raphanus sativus]
GSBRNA2T00080784001	BnaC02g01040D	289	C	mitochondria	0.651	0.653	0.477	0.689	0.776	0.468	ATP synthase subunit beta-1, mitochondrial [Raphanus sativus]
GSBRNA2T00081279001	BnaA08g11910D	145	C	chloroplast	0.484			0.453			---
GSBRNA2T00081279001	BnaA08g11910D	148	C	chloroplast	0.484			0.453			---
GSBRNA2T00081279001	BnaA08g11910D	154	C	chloroplast	0.484			0.453			---
GSBRNA2T00081358001	BnaA02g04960D	41	C	plasma membrane	0.206	0.122	0.146	0.183	0.099	0.166	germin-like protein 1 [Brassica rapa]
GSBRNA2T00081583001	BnaA09g14300D	117	C	chloroplast	0.325			0.48			28 kDa ribonucleoprotein, chloroplastic [Brassica rapa]
GSBRNA2T00081671001	BnaA07g12540D	100	C	chloroplast			0.144			0.61	putative glucose-6-phosphate 1-epimerase isoform X2 [Brassica rapa]
GSBRNA2T00081671001	BnaA07g12540D	281	C	chloroplast			0.324			0.422	putative glucose-6-phosphate 1-epimerase isoform X2 [Brassica rapa]
GSBRNA2T00081678001	BnaA07g12480D	114	C	chloroplast			0.088			0.035	---
GSBRNA2T00081678001	BnaA07g12480D	137	C	chloroplast			0.074			0.141	---
GSBRNA2T00082082001	BnaA05g12410D	572	C	chloroplast		0.224			0.291		phosphomethylpyrimidine synthase, chloroplastic [Brassica napus]
GSBRNA2T00082082001	BnaA05g12410D	575	C	chloroplast		0.224			0.291		phosphomethylpyrimidine synthase, chloroplastic [Brassica napus]
GSBRNA2T00082224001	BnaCnng12890D	125	C	chloroplast	0.344	0.414	0.245	0.497	0.537	0.338	atp4 (mitochondrion) [Brassica juncea]
GSBRNA2T00082361001	BnaCnng13310D	270	C	extracellular	1.077			1.179			probable xyloglucan endotransglucosylase/hydrolase protein 6 isoform X2 [Brassica napus]
GSBRNA2T00083171001	BnaC02g17330D	279	C	chloroplast		1.609			1.3		Zinc-finger domain of monoamine-oxidase A repressor R1 protein [Arabidopsis thaliana]
GSBRNA2T00083201001	BnaC01g35030D	370	C	plasma membrane			0.272			0.593	rhomboid-like protein 14, mitochondrial isoform X2 [Brassica oleracea var. oleracea]
GSBRNA2T00083616001	BnaC05g50520D	75	C	cytoplasm	0.215			0.228			alanine--tRNA ligase [Raphanus sativus]
GSBRNA2T00083616001	BnaC05g50520D	78	C	cytoplasm	0.215			0.228			alanine--tRNA ligase [Raphanus sativus]
GSBRNA2T00083635001	BnaC05g50670D	147	C	cytoplasm		0.353			0.397	0.461	ATP-dependent Clp protease proteolytic subunit-related protein 1, chloroplastic-like [Brassica napus]
GSBRNA2T00083772001	BnaC01g30200D	601	C	chloroplast	0.142		0.273	0.284		0.335	dihydroxy-acid dehydratase, chloroplastic [Brassica napus]
GSBRNA2T00084106001	BnaA02g27540D	63	C	extracellular		1					transmembrane protein [Arabidopsis thaliana]
GSBRNA2T00084232001	BnaCnng62500D	82	C	chloroplast				0.238	0.096		serine hydroxymethyltransferase 4 [Brassica oleracea var. oleracea]
GSBRNA2T00084232001	BnaCnng62500D	187	C	chloroplast	0.239	0.454	0.239	0.428	0.593	0.312	serine hydroxymethyltransferase 4 [Brassica oleracea var. oleracea]
GSBRNA2T00084232001	BnaCnng62500D	364	C	chloroplast	0.492	0.92	0.199	0.57	0.74	0.232	serine hydroxymethyltransferase 4 [Brassica oleracea var. oleracea]
GSBRNA2T00084232001	BnaCnng62500D	367	C	chloroplast	0.492	0.92	0.199	0.57	0.74	0.232	serine hydroxymethyltransferase 4 [Brassica oleracea var. oleracea]
GSBRNA2T00084355001	BnaC02g24980D	179	C	cytoplasm		0.779			0.929		glutathione S-transferase U19-like [Brassica napus]
GSBRNA2T00084729001	BnaC04g48440D	417	C	cytoplasm			0.071				---
GSBRNA2T00084729001	BnaC04g48440D	419	C	cytoplasm			0.071				---
GSBRNA2T00084729001	BnaC04g48440D	546	C	cytoplasm			0.541			0.704	---
GSBRNA2T00084729001	BnaC04g48440D	680	C	cytoplasm						0.305	---
GSBRNA2T00085322001	BnaC05g00300D	233	C	plasma membrane				0.209			K(+) efflux antiporter 1, chloroplastic-like isoform X2 [Brassica oleracea var. oleracea]
GSBRNA2T00085322001	BnaC05g00300D	240	C	plasma membrane				0.209			K(+) efflux antiporter 1, chloroplastic-like isoform X2 [Brassica oleracea var. oleracea]
GSBRNA2T00085389001	BnaC05g00820D	102	C	chloroplast	0.119	0.201	0.171	0.15	0.152	0.128	31 kDa ribonucleoprotein, chloroplastic-like [Brassica napus]
GSBRNA2T00085389001	BnaC05g00820D	107	C	chloroplast	0.119	0.201	0.171	0.15	0.152	0.128	31 kDa ribonucleoprotein, chloroplastic-like [Brassica napus]
GSBRNA2T00085550001	BnaC06g07900D	65	C	cytoplasm	0.24	0.426		0.389	0.538		40S ribosomal protein S18 [Brassica rapa]
GSBRNA2T00085634001	BnaC04g42750D	63	C	cytoplasm	0.181	0.139	0.12	0.234	0.092	0.107	40S ribosomal protein S12-1 [Brassica napus]
GSBRNA2T00085634001	BnaC04g42750D	69	C	cytoplasm	0.181	0.139	0.12	0.234	0.092	0.107	40S ribosomal protein S12-1 [Brassica napus]
GSBRNA2T00085634001	BnaC04g42750D	82	C	cytoplasm		0.226			0.309		40S ribosomal protein S12-1 [Brassica napus]
GSBRNA2T00085634001	BnaC04g42750D	105	C	cytoplasm		0.188			0.194		40S ribosomal protein S12-1 [Brassica napus]
GSBRNA2T00085634001	BnaC04g42750D	119	C	cytoplasm		0.47			0.447		40S ribosomal protein S12-1 [Brassica napus]
GSBRNA2T00085634001	BnaC04g42750D	121	C	cytoplasm		0.47			0.447		40S ribosomal protein S12-1 [Brassica napus]
GSBRNA2T00086344001	BnaA01g27820D	69	C	Golgi apparatus,plasma membrane	0.181			0.206			B-cell receptor-associated 31-like protein [Arabidopsis thaliana]
GSBRNA2T00086344001	BnaA01g27820D	74	C	Golgi apparatus,plasma membrane	0.181			0.206			B-cell receptor-associated 31-like protein [Arabidopsis thaliana]
GSBRNA2T00086390001	BnaA09g12770D	337	C	chloroplast		0.294	0.139		0.378	0.327	elongation factor G, chloroplastic [Brassica rapa]
GSBRNA2T00086390001	BnaA09g12770D	627	C	chloroplast	0.352			0.677			elongation factor G, chloroplastic [Brassica rapa]
GSBRNA2T00086448001	BnaA02g32820D	50	C	nucleus			0.147			0.253	---
GSBRNA2T00087145001	BnaAnng08830D	42	C	cytoplasm	0.394			0.793			---
GSBRNA2T00087145001	BnaAnng08830D	84	C	cytoplasm	0.135			0.087			---
GSBRNA2T00087145001	BnaAnng08830D	86	C	cytoplasm	0.135			0.087			---
GSBRNA2T00087145001	BnaAnng08830D	120	C	cytoplasm	0.185			0.297			---
GSBRNA2T00087145001	BnaAnng08830D	244	C	cytoplasm	0.204			0.245			---
GSBRNA2T00087145001	BnaAnng08830D	268	C	cytoplasm	0.185			0.421			---
GSBRNA2T00087256001	BnaCnng15040D	428	C	chloroplast		0.127					---
GSBRNA2T00087256001	BnaCnng15040D	437	C	chloroplast		0.127					---
GSBRNA2T00087256001	BnaCnng15040D	445	C	chloroplast		0.127					---
GSBRNA2T00087256001	BnaCnng15040D	448	C	chloroplast		0.127					---
GSBRNA2T00087522001	BnaA09g08780D	40	C	chloroplast	0.18	0.172	0.112	0.21	0.282	0.127	peptidyl-prolyl cis-trans isomerase-like [Brassica napus]
GSBRNA2T00087522001	BnaA09g08780D	168	C	chloroplast	0.413	0.378	0.397	0.557	0.35	0.542	peptidyl-prolyl cis-trans isomerase-like [Brassica napus]
GSBRNA2T00087850001	BnaC05g18870D	300	C	chloroplast	0.732	0.511		0.789	0.853		quinone oxidoreductase-like protein At1g23740, chloroplastic [Brassica napus]
GSBRNA2T00088147001	BnaCnng63770D	167	C	chloroplast				0.112			ferredoxin--nitrite reductase, chloroplastic-like [Brassica napus]
GSBRNA2T00088147001	BnaCnng63770D	186	C	chloroplast				0.112			ferredoxin--nitrite reductase, chloroplastic-like [Brassica napus]
GSBRNA2T00088147001	BnaCnng63770D	338	C	chloroplast	0.19	0.263		0.229	0.188		ferredoxin--nitrite reductase, chloroplastic-like [Brassica napus]
GSBRNA2T00088147001	BnaCnng63770D	344	C	chloroplast	0.19	0.263		0.229	0.188		ferredoxin--nitrite reductase, chloroplastic-like [Brassica napus]
GSBRNA2T00088147001	BnaCnng63770D	379	C	chloroplast	0.077	0.18	0.096		0.052	0.077	ferredoxin--nitrite reductase, chloroplastic-like [Brassica napus]
GSBRNA2T00088147001	BnaCnng63770D	383	C	chloroplast	0.077	0.18	0.096		0.052	0.077	ferredoxin--nitrite reductase, chloroplastic-like [Brassica napus]
GSBRNA2T00088147001	BnaCnng63770D	396	C	chloroplast	0.077	0.18	0.096		0.052	0.077	ferredoxin--nitrite reductase, chloroplastic-like [Brassica napus]
GSBRNA2T00088488001	BnaC08g46180D	314	C	chloroplast	0.065	0.104	0.117	0.027	0.022	0.021	glyceraldehyde-3-phosphate dehydrogenase GAPB, chloroplastic [Brassica oleracea var. oleracea]
GSBRNA2T00088488001	BnaC08g46180D	321	C	chloroplast	0.065	0.104	0.117	0.027	0.022	0.021	glyceraldehyde-3-phosphate dehydrogenase GAPB, chloroplastic [Brassica oleracea var. oleracea]
GSBRNA2T00088488001	BnaC08g46180D	325	C	chloroplast	0.545	0.487	0.411	0.745	0.502	0.5	glyceraldehyde-3-phosphate dehydrogenase GAPB, chloroplastic [Brassica oleracea var. oleracea]
GSBRNA2T00088488001	BnaC08g46180D	388	C	chloroplast	0.105	0.112	0.053	0.12	0.187	0.169	glyceraldehyde-3-phosphate dehydrogenase GAPB, chloroplastic [Brassica oleracea var. oleracea]
GSBRNA2T00088488001	BnaC08g46180D	397	C	chloroplast	0.24	0.298	0.168	0.325	0.373	0.22	glyceraldehyde-3-phosphate dehydrogenase GAPB, chloroplastic [Brassica oleracea var. oleracea]
GSBRNA2T00088545001	BnaA02g08230D	8	C	mitochondria	0.139	0.208	0.139	0.145	0.204	0.18	60S acidic ribosomal protein P3-2-like [Brassica napus]
GSBRNA2T00089042001	BnaCnng16050D	104	C	chloroplast	0.073		0.097			0.009	thioredoxin M2, chloroplastic-like isoform X2 [Brassica napus]
GSBRNA2T00089042001	BnaCnng16050D	107	C	chloroplast	0.073		0.097			0.009	thioredoxin M2, chloroplastic-like isoform X2 [Brassica napus]
GSBRNA2T00089769001	BnaA08g28700D	21	C	nucleus	0.441	0.469	0.308	0.54	0.626	0.346	protein JASON [Brassica napus]
GSBRNA2T00089776001	BnaA08g28770D	188	C	chloroplast	0.116			0.062			---
GSBRNA2T00089776001	BnaA08g28770D	192	C	chloroplast	0.116			0.062			---
GSBRNA2T00090065001	BnaC04g15370D	94	C	chloroplast		0.111			0.103		osmotin-like protein [Brassica napus]
GSBRNA2T00090065001	BnaC04g15370D	99	C	chloroplast		0.111			0.103		osmotin-like protein [Brassica napus]
GSBRNA2T00090065001	BnaC04g15370D	155	C	chloroplast	0.113	0.131	0.119	0.11	0.096	0.068	osmotin-like protein [Brassica napus]
GSBRNA2T00090065001	BnaC04g15370D	160	C	chloroplast	0.113	0.131	0.119	0.11	0.096	0.068	osmotin-like protein [Brassica napus]
GSBRNA2T00090065001	BnaC04g15370D	168	C	chloroplast	0.372	0.475	0.412	0.466	0.538	0.498	osmotin-like protein [Brassica napus]
GSBRNA2T00090065001	BnaC04g15370D	198	C	chloroplast	0.273			0.257			osmotin-like protein [Brassica napus]
GSBRNA2T00090065001	BnaC04g15370D	199	C	chloroplast	0.273			0.257			osmotin-like protein [Brassica napus]
GSBRNA2T00090065001	BnaC04g15370D	222	C	chloroplast	0.123	0.058		0.168	0.222		osmotin-like protein [Brassica napus]
GSBRNA2T00090065001	BnaC04g15370D	239	C	chloroplast	0.123	0.058		0.168	0.222		osmotin-like protein [Brassica napus]
GSBRNA2T00090234001	BnaA04g12350D	10	C	nucleus	0.154	0.386		0.18	0.53		glycine-rich RNA-binding protein GRP2A [Brassica rapa]
GSBRNA2T00090482001	BnaC08g40470D	233	C	chloroplast			0.812			0.9	methionine aminopeptidase 1B, chloroplastic-like isoform X1 [Brassica napus]
GSBRNA2T00090796001	BnaC01g23300D	53	C	extracellular			0.21			0.194	non-specific lipid-transfer protein 5-like [Brassica napus]
GSBRNA2T00090796001	BnaC01g23300D	54	C	extracellular			0.21			0.194	non-specific lipid-transfer protein 5-like [Brassica napus]
GSBRNA2T00090867001	BnaA02g11430D	144	C	chloroplast		0.453			0.514		lipoxygenase 2, chloroplastic-like [Brassica rapa]
GSBRNA2T00091119001	BnaA08g02530D	134	C	extracellular	0.323			0.434			leucine-rich repeat extensin-like protein 3 [Raphanus sativus]
GSBRNA2T00091119001	BnaA08g02530D	366	C	extracellular	0.388			0.15			leucine-rich repeat extensin-like protein 3 [Raphanus sativus]
GSBRNA2T00091301001	BnaA09g01610D	110	C	chloroplast		0.126			0.007		---
GSBRNA2T00091301001	BnaA09g01610D	113	C	chloroplast		0.126			0.007		---
GSBRNA2T00091439001	BnaAnng31150D	108	C	chloroplast		0.282			0.497		phospholipid hydroperoxide glutathione peroxidase 1, chloroplastic-like [Brassica napus]
GSBRNA2T00091439001	BnaAnng31150D	137	C	chloroplast			0.15	0.105		0.153	phospholipid hydroperoxide glutathione peroxidase 1, chloroplastic-like [Brassica napus]
GSBRNA2T00092231001	BnaAnng10160D	318	C	chloroplast	0.253	0.371	0.265	0.32	0.422	0.375	elongation factor Tu, chloroplastic-like [Brassica rapa]
GSBRNA2T00092893001	BnaA05g33170D	709	C	nucleus		0.551		0.461	0.747		disease resistance protein TAO1-like [Brassica napus]
GSBRNA2T00092896001	BnaA05g33200D	154	C	cytoplasm	0.134	0.122	0.062	0.072	0.059	0.032	glyceraldehyde-3-phosphate dehydrogenase, cytosolic-like [Brassica napus]
GSBRNA2T00092896001	BnaA05g33200D	158	C	cytoplasm	0.134	0.122	0.062	0.072	0.059	0.032	glyceraldehyde-3-phosphate dehydrogenase, cytosolic-like [Brassica napus]
GSBRNA2T00092908001	BnaA08g29950D	148	C	chloroplast					0.051	0.038	glutamine synthetase, chloroplastic-like [Brassica napus]
GSBRNA2T00092908001	BnaA08g29950D	304	C	chloroplast	0.386			0.435			glutamine synthetase, chloroplastic-like [Brassica napus]
GSBRNA2T00093004001	BnaC07g06450D	257	C	chloroplast	0.282	0.258		0.435	0.443		ankyrin repeat domain-containing protein 2-like [Brassica napus]
GSBRNA2T00093856001	BnaC06g04530D	91	C	chloroplast	0.463	0.441	0.514	0.48	0.355	0.485	photosystem II 5 kDa protein, chloroplastic-like [Brassica napus]
GSBRNA2T00093888001	BnaC01g34640D	271	C	chloroplast	1.157	0.667	0.813	1.13	0.902	0.774	dihydropyrimidine dehydrogenase (NADP(+)), chloroplastic-like [Brassica napus]
GSBRNA2T00094000001	BnaA02g35040D	110	C	chloroplast	0.123	0.133	0.118	0.1	0.153	0.124	thioredoxin F2, chloroplastic-like [Brassica napus]
GSBRNA2T00094000001	BnaA02g35040D	113	C	chloroplast	0.123	0.133	0.118	0.1	0.153	0.124	thioredoxin F2, chloroplastic-like [Brassica napus]
GSBRNA2T00094594001	BnaA09g06550D	52	C	cytoplasm		0.28	0.334		0.252	0.389	adenylate kinase 4 [Brassica rapa]
GSBRNA2T00094594001	BnaA09g06550D	54	C	cytoplasm		0.28	0.334		0.252	0.389	adenylate kinase 4 [Brassica rapa]
GSBRNA2T00094857001	BnaC09g40620D	72	C	cytoplasm		0.573			0.942		glutamate decarboxylase 1-like [Brassica napus]
GSBRNA2T00094857001	BnaC09g40620D	347	C	cytoplasm		0.382			0.54		glutamate decarboxylase 1-like [Brassica napus]
GSBRNA2T00095199001	BnaA05g10480D	402	C	cytoplasm	0.584			0.843			3-ketoacyl-CoA thiolase 2, peroxisomal [Brassica rapa]
GSBRNA2T00095651001	BnaC03g65890D	154	C	cytoplasm			0.264			0.411	---
GSBRNA2T00095707001	BnaC03g65520D	127	C	plasma membrane	0.291	0.315		0.369	0.399		aquaporin PIP2-7-like [Brassica napus]
GSBRNA2T00095707001	BnaC03g65520D	132	C	plasma membrane	0.291	0.315		0.369	0.399		aquaporin PIP2-7-like [Brassica napus]
GSBRNA2T00095749001	BnaC03g65320D	191	C	chloroplast		0.336			0.489		NAD(P)-binding Rossmann-fold superfamily protein [Arabidopsis thaliana]
GSBRNA2T00095912001	BnaC01g43540D	346	C	cytoplasm				0.421			adenosylhomocysteinase 2 [Brassica napus]
GSBRNA2T00096086001	BnaC08g15900D	190	C	cytoskeleton	0.102	0.145	0.095		0.026		glyceraldehyde-3-phosphate dehydrogenase, cytosolic-like [Brassica napus]
GSBRNA2T00096086001	BnaC08g15900D	194	C	cytoskeleton	0.102	0.145	0.095		0.026		glyceraldehyde-3-phosphate dehydrogenase, cytosolic-like [Brassica napus]
GSBRNA2T00096509001	BnaUnng03640D	43	C	chloroplast		0.146	0.135		0.152	0.114	mitochondrial import inner membrane translocase subunit TIM9 [Brassica napus]
GSBRNA2T00096509001	BnaUnng03640D	47	C	chloroplast		0.146	0.135		0.152	0.114	mitochondrial import inner membrane translocase subunit TIM9 [Brassica napus]
GSBRNA2T00096872001	BnaA02g24170D	303	C	chloroplast	0.168	0.161	0.215	0.122	0.132	0.135	GDSL esterase/lipase At5g45950 [Brassica napus]
GSBRNA2T00096872001	BnaA02g24170D	304	C	chloroplast	0.168	0.161	0.215	0.122	0.132	0.135	GDSL esterase/lipase At5g45950 [Brassica napus]
GSBRNA2T00096872001	BnaA02g24170D	315	C	chloroplast	0.168	0.161	0.215	0.122	0.132	0.135	GDSL esterase/lipase At5g45950 [Brassica napus]
GSBRNA2T00097045001	BnaCnng67080D	412	C	cytoplasm	0.361			0.476			ATP-citrate synthase alpha chain protein 2 [Brassica napus]
GSBRNA2T00097529001	BnaCnng19730D	190	C	cytoplasm	0.344	0.66	0.165	0.493	0.559	0.235	stem-specific protein TSJT1 [Brassica napus]
GSBRNA2T00097775001	BnaA03g59020D	371	C	chloroplast		0.076		0.176	0.17	0.274	fe-S cluster assembly factor HCF101, chloroplastic-like [Brassica napus]
GSBRNA2T00097775001	BnaA03g59020D	376	C	chloroplast		0.076		0.176	0.17	0.274	fe-S cluster assembly factor HCF101, chloroplastic-like [Brassica napus]
GSBRNA2T00098574001	BnaA07g15100D	61	C	chloroplast	0.159	0.156	0.199	0.163	0.208	0.253	succinate dehydrogenase [ubiquinone] iron-sulfur subunit 2, mitochondrial-like [Brassica napus]
GSBRNA2T00098574001	BnaA07g15100D	67	C	chloroplast	0.159	0.156	0.199	0.163	0.208	0.253	succinate dehydrogenase [ubiquinone] iron-sulfur subunit 2, mitochondrial-like [Brassica napus]
GSBRNA2T00098834001	BnaA07g17040D	253	C	chloroplast	0.137	0.141		0.25	0.233		magnesium-protoporphyrin IX monomethyl ester [oxidative] cyclase, chloroplastic [Brassica rapa]
GSBRNA2T00098876001	BnaA07g17380D	199	C	chloroplast		0.582	0.223		0.619	0.591	adenylosuccinate synthetase, chloroplastic-like [Raphanus sativus]
GSBRNA2T00099095001	BnaA07g19320D	76	C	chloroplast	0.047	0.022	0.045				calvin cycle protein CP12-2, chloroplastic-like [Brassica rapa]
GSBRNA2T00099095001	BnaA07g19320D	85	C	chloroplast	0.047	0.022	0.045				calvin cycle protein CP12-2, chloroplastic-like [Brassica rapa]
GSBRNA2T00099095001	BnaA07g19320D	116	C	chloroplast	0.202	0.152	0.259	0.321	0.269	0.31	calvin cycle protein CP12-2, chloroplastic-like [Brassica rapa]
GSBRNA2T00099095001	BnaA07g19320D	125	C	chloroplast	0.235	0.443	0.17	0.261	0.447	0.188	calvin cycle protein CP12-2, chloroplastic-like [Brassica rapa]
GSBRNA2T00099126001	BnaA07g19580D	208	C	chloroplast	0.42	0.401	0.309	0.543	0.493	0.639	2-methyl-6-phytyl-1,4-hydroquinone methyltransferase, chloroplastic [Brassica rapa]
GSBRNA2T00099128001	BnaA07g19600D	148	C	chloroplast		0.458			0.41		lipoxygenase 2, chloroplastic-like [Brassica napus]
GSBRNA2T00099128001	BnaA07g19600D	619	C	chloroplast	0.09	0.313	0.395	0.259	0.114	0.29	lipoxygenase 2, chloroplastic-like [Brassica napus]
GSBRNA2T00099540001	BnaA07g23000D	38	C	chloroplast	0.217	0.226	0.182	0.23	0.239	0.237	germin-like protein 1 [Brassica rapa]
GSBRNA2T00099549001	BnaA07g23080D	28	C	cytoplasm	0.703	0.683	0.417	0.838	0.77	0.515	40S ribosomal protein SA-like [Brassica napus]
GSBRNA2T00099549001	BnaA07g23080D	171	C	cytoplasm	0.194	0.212	0.197	0.233	0.241	0.241	40S ribosomal protein SA-like [Brassica napus]
GSBRNA2T00099688001	BnaC07g42500D	229	C	extracellular			0.396			0.454	xyloglucan endotransglucosylase/hydrolase protein 24 [Brassica oleracea var. oleracea]
GSBRNA2T00099688001	BnaC07g42500D	261	C	extracellular			0.693			0.313	xyloglucan endotransglucosylase/hydrolase protein 24 [Brassica oleracea var. oleracea]
GSBRNA2T00099957001	BnaC07g44690D	243	C	cytoplasm	0.142	0.123	0.164	0.115	0.065	0.074	caffeoyl-CoA O-methyltransferase 1 [Brassica napus]
GSBRNA2T00099957001	BnaC07g44690D	254	C	cytoplasm	0.142	0.123	0.164	0.115	0.065	0.074	caffeoyl-CoA O-methyltransferase 1 [Brassica napus]
GSBRNA2T00100024001	BnaC07g45170D	154	C	cytoplasm		0.351			0.32		---
GSBRNA2T00100024001	BnaC07g45170D	179	C	cytoplasm		0.195			0.417		---
GSBRNA2T00100571001	BnaC05g06200D	149	C	Golgi apparatus	0.252	0.24		0.322	0.381		violaxanthin de-epoxidase, chloroplastic-like [Brassica napus]
GSBRNA2T00100571001	BnaC05g06200D	151	C	Golgi apparatus	0.252	0.24		0.322	0.381		violaxanthin de-epoxidase, chloroplastic-like [Brassica napus]
GSBRNA2T00100654001	BnaC05g05550D	32	C	mitochondria	0.398	0.693	0.568	0.521	0.658	0.516	L-ascorbate peroxidase 1, cytosolic-like [Brassica napus]
GSBRNA2T00100654001	BnaC05g05550D	49	C	mitochondria	0.18	0.194	0.125	0.276	0.299	0.205	L-ascorbate peroxidase 1, cytosolic-like [Brassica napus]
GSBRNA2T00100794001	BnaC09g16660D	37	C	chloroplast	0.27	0.413		0.363	0.436		ribosomal protein L2 (chloroplast) [Schrenkiella parvula]
GSBRNA2T00100911001	BnaC09g15940D	21	C	cytoplasm	0.221	0.221	0.196	0.27	0.247	0.216	plant/protein (Protein of unknown function, DUF538) [Arabidopsis thaliana]
GSBRNA2T00101547001	BnaC03g25430D	225	C	chloroplast	0.143	0.398		0.349	0.293		peroxisomal membrane protein 11D-like [Brassica napus]
GSBRNA2T00101634001	BnaC03g26120D	88	C	chloroplast		0.267	0.304		0.37	0.243	glutathione S-transferase F8, chloroplastic-like [Brassica oleracea var. oleracea]
GSBRNA2T00101634001	BnaC03g26120D	91	C	chloroplast		0.267	0.304		0.37	0.243	glutathione S-transferase F8, chloroplastic-like [Brassica oleracea var. oleracea]
GSBRNA2T00102092001	BnaA07g26770D	59	C	chloroplast		0.201	0.158		0.284	0.197	glycerate dehydrogenase HPR, peroxisomal-like [Raphanus sativus]
GSBRNA2T00102092001	BnaA07g26770D	64	C	chloroplast		0.314	0.22		0.43	0.35	glycerate dehydrogenase HPR, peroxisomal-like [Raphanus sativus]
GSBRNA2T00102092001	BnaA07g26770D	84	C	chloroplast					0.462		glycerate dehydrogenase HPR, peroxisomal-like [Raphanus sativus]
GSBRNA2T00102092001	BnaA07g26770D	292	C	chloroplast		0.239	0.112		0.353	0.17	glycerate dehydrogenase HPR, peroxisomal-like [Raphanus sativus]
GSBRNA2T00102109001	BnaA07g26630D	257	C	chloroplast	0.57	0.61	0.49	0.576	0.728	0.618	ATP-dependent zinc metalloprotease FTSH 1, chloroplastic [Brassica rapa]
GSBRNA2T00102109001	BnaA07g26630D	315	C	chloroplast	0.367	0.592	0.382	0.38	0.657	0.622	ATP-dependent zinc metalloprotease FTSH 1, chloroplastic [Brassica rapa]
GSBRNA2T00102295001	BnaC02g14460D	102	C	cytoplasm			0.166			0.322	---
GSBRNA2T00102478001	BnaA07g29390D	414	C	chloroplast	0.088	0.063	0.104	0.043		0.035	Rieske (2Fe-2S) domain-containing protein [Arabidopsis thaliana]
GSBRNA2T00102478001	BnaA07g29390D	417	C	chloroplast	0.088	0.063	0.104	0.043		0.035	Rieske (2Fe-2S) domain-containing protein [Arabidopsis thaliana]
GSBRNA2T00102711001	BnaA07g31390D	1342	C	chloroplast	0.402	0.253	0.429	0.54	0.417	0.572	probable phosphoribosylformylglycinamidine synthase, chloroplastic/mitochondrial [Brassica napus]
GSBRNA2T00102833001	BnaA08g21730D	86	C	peroxisome	0.12	0.119	0.066	0.189	0.251	0.213	catalase-3 [Brassica napus]
GSBRNA2T00102833001	BnaA08g21730D	230	C	peroxisome	0.251	0.383	0.307	0.306	0.508	0.378	catalase-3 [Brassica napus]
GSBRNA2T00102833001	BnaA08g21730D	370	C	peroxisome	0.28	0.466		0.389	0.578		catalase-3 [Brassica napus]
GSBRNA2T00103061001	BnaA08g23710D	39	C	cytoplasm	0.123	0.068	0.108	0.043	0.064		40S ribosomal protein S12-2-like [Brassica napus]
GSBRNA2T00103061001	BnaA08g23710D	45	C	cytoplasm	0.123	0.068	0.108	0.043	0.064		40S ribosomal protein S12-2-like [Brassica napus]
GSBRNA2T00103061001	BnaA08g23710D	81	C	cytoplasm	0.186		0.144	0.126		0.156	40S ribosomal protein S12-2-like [Brassica napus]
GSBRNA2T00103061001	BnaA08g23710D	95	C	cytoplasm	0.195		0.4	0.272		0.526	40S ribosomal protein S12-2-like [Brassica napus]
GSBRNA2T00103061001	BnaA08g23710D	97	C	cytoplasm	0.195		0.4	0.272		0.526	40S ribosomal protein S12-2-like [Brassica napus]
GSBRNA2T00103596001	BnaC06g35720D	270	C	cytoplasm	0.345		0.231	0.489		0.391	mannose-1-phosphate guanyltransferase alpha-like isoform X1 [Brassica napus]
GSBRNA2T00103622001	BnaC06g35930D	47	C	chloroplast		0.259		0.126	0.332		mitochondrial import inner membrane translocase subunit TIM13-like [Brassica napus]
GSBRNA2T00103622001	BnaC06g35930D	62	C	chloroplast		0.259		0.126	0.332		mitochondrial import inner membrane translocase subunit TIM13-like [Brassica napus]
GSBRNA2T00103686001	BnaC06g36410D	40	C	extracellular	0.122	0.119	0.132	0.102	0.068	0.066	gibberellin-regulated protein 1 [Brassica napus]
GSBRNA2T00103686001	BnaC06g36410D	44	C	extracellular	0.122	0.119	0.132	0.102	0.068	0.066	gibberellin-regulated protein 1 [Brassica napus]
GSBRNA2T00103686001	BnaC06g36410D	68	C	extracellular	0.276	0.199	0.25	0.265	0.206	0.237	gibberellin-regulated protein 1 [Brassica napus]
GSBRNA2T00103686001	BnaC06g36410D	70	C	extracellular	0.276	0.199	0.25	0.265	0.206	0.237	gibberellin-regulated protein 1 [Brassica napus]
GSBRNA2T00103686001	BnaC06g36410D	82	C	extracellular	0.156	0.177	0.159	0.127	0.142	0.121	gibberellin-regulated protein 1 [Brassica napus]
GSBRNA2T00103686001	BnaC06g36410D	84	C	extracellular	0.156	0.177	0.159	0.127	0.142	0.121	gibberellin-regulated protein 1 [Brassica napus]
GSBRNA2T00103728001	BnaC06g36750D	126	C	chloroplast	0.561		0.215	0.748		0.655	thioredoxin-like protein CDSP32, chloroplastic [Brassica oleracea var. oleracea]
GSBRNA2T00103728001	BnaC06g36750D	223	C	chloroplast			0.188			0.078	thioredoxin-like protein CDSP32, chloroplastic [Brassica oleracea var. oleracea]
GSBRNA2T00103728001	BnaC06g36750D	226	C	chloroplast			0.188			0.078	thioredoxin-like protein CDSP32, chloroplastic [Brassica oleracea var. oleracea]
GSBRNA2T00103897001	BnaC02g31030D	238	C	nucleus		0.079			0.182	0.228	tubulin beta-4 chain-like [Brassica napus]
GSBRNA2T00103897001	BnaC02g31030D	239	C	nucleus		0.079			0.182	0.228	tubulin beta-4 chain-like [Brassica napus]
GSBRNA2T00103897001	BnaC02g31030D	354	C	nucleus			0.749			0.685	tubulin beta-4 chain-like [Brassica napus]
GSBRNA2T00104751001	BnaA05g25390D	167	C	extracellular	0.363	0.252	0.42	0.562	0.45	0.494	subtilisin-like protease SBT1.4 [Brassica rapa]
GSBRNA2T00104751001	BnaA05g25390D	178	C	extracellular	0.363	0.252	0.42	0.562	0.45	0.494	subtilisin-like protease SBT1.4 [Brassica rapa]
GSBRNA2T00105272001	BnaA06g06760D	70	C	chloroplast					0.025		ferredoxin-1, chloroplastic-like [Brassica napus]
GSBRNA2T00105272001	BnaA06g06760D	91	C	chloroplast					0.025		ferredoxin-1, chloroplastic-like [Brassica napus]
GSBRNA2T00105394001	BnaA06g07790D	340	C	chloroplast	0.115	0.196	0.111	0.163	0.212	0.162	glyceraldehyde-3-phosphate dehydrogenase GAPA2, chloroplastic [Brassica napus]
GSBRNA2T00105394001	BnaA06g07790D	351	C	chloroplast	0.664	0.419	0.566	0.564	0.519	0.554	glyceraldehyde-3-phosphate dehydrogenase GAPA2, chloroplastic [Brassica napus]
GSBRNA2T00105563001	BnaC07g09420D	147	C	chloroplast		0.266			0.576		glycine--tRNA ligase 1, mitochondrial-like [Brassica oleracea var. oleracea]
GSBRNA2T00105563001	BnaC07g09420D	582	C	chloroplast	0.144	0.082		0.098			glycine--tRNA ligase 1, mitochondrial-like [Brassica oleracea var. oleracea]
GSBRNA2T00105563001	BnaC07g09420D	587	C	chloroplast	0.144	0.082		0.098			glycine--tRNA ligase 1, mitochondrial-like [Brassica oleracea var. oleracea]
GSBRNA2T00105663001	BnaC07g08970D	20	C	mitochondria			1.035			0.779	putative F-box protein At1g32660 [Brassica rapa]
GSBRNA2T00105851001	BnaC06g16700D	243	C	chloroplast		0.574	0.45		0.661	0.55	ketol-acid reductoisomerase, chloroplastic [Brassica oleracea var. oleracea]
GSBRNA2T00105851001	BnaC06g16700D	348	C	chloroplast		0.253	0.415		0.362	0.441	ketol-acid reductoisomerase, chloroplastic [Brassica oleracea var. oleracea]
GSBRNA2T00105851001	BnaC06g16700D	510	C	chloroplast		0.356	0.39		0.528	0.595	ketol-acid reductoisomerase, chloroplastic [Brassica oleracea var. oleracea]
GSBRNA2T00105866001	BnaC06g16830D	67	C	nucleus		0.819			0.71		60S ribosomal protein L11-2-like [Raphanus sativus]
GSBRNA2T00105985001	BnaC06g17620D	130	C	cytoplasm				0.345			methylenetetrahydrofolate reductase 1 [Brassica oleracea var. oleracea]
GSBRNA2T00105985001	BnaC06g17620D	271	C	cytoplasm		0.58			0.578		methylenetetrahydrofolate reductase 1 [Brassica oleracea var. oleracea]
GSBRNA2T00106127001	BnaC05g38810D	44	C	chloroplast		0.826			1.132		trifunctional UDP-glucose 4,6-dehydratase/UDP-4-keto-6-deoxy-D-glucose 3,5-epimerase/UDP-4-keto-L-rhamnose-reductase RHM3-like [Brassica napus]
GSBRNA2T00106508001	BnaC05g27530D	111	C	cytoplasm				0.391			annexin D1 [Brassica rapa]
GSBRNA2T00106508001	BnaC05g27530D	239	C	cytoplasm	0.394	0.059	0.804	0.348	0.391	0.582	annexin D1 [Brassica rapa]
GSBRNA2T00107221001	BnaA06g17710D	145	C	cytoplasm		0.411			0.612		alpha-glucan phosphorylase 2, cytosolic-like isoform X1 [Brassica napus]
GSBRNA2T00107228001	BnaA06g17780D	25	C	nucleus		0.436			0.394		tubulin beta-2 chain [Raphanus sativus]
GSBRNA2T00107228001	BnaA06g17780D	56	C	nucleus		0.214	0.211		0.441	0.523	tubulin beta-2 chain [Raphanus sativus]
GSBRNA2T00107378001	BnaA06g18870D	20	C	nucleus		0.449	0.24		0.58	0.298	---
GSBRNA2T00107570001	BnaC05g34130D	167	C	chloroplast	0.13						---
GSBRNA2T00107570001	BnaC05g34130D	168	C	chloroplast	0.13						---
GSBRNA2T00107570001	BnaC05g34130D	301	C	chloroplast	0.347			0.419			---
GSBRNA2T00107809001	BnaC01g10870D	101	C	chloroplast	0.342	0.418		0.671	0.572		magnesium-chelatase subunit ChlI-1, chloroplastic [Brassica napus]
GSBRNA2T00107809001	BnaC01g10870D	192	C	chloroplast	0.383	0.332	0.294	0.598	0.61	0.62	magnesium-chelatase subunit ChlI-1, chloroplastic [Brassica napus]
GSBRNA2T00107809001	BnaC01g10870D	353	C	chloroplast	0.336	0.182	0.415	0.417	0.245	0.369	magnesium-chelatase subunit ChlI-1, chloroplastic [Brassica napus]
GSBRNA2T00108101001	BnaC04g33570D	164	C	chloroplast	0.174	0.07	0.095	0.316	0.283	0.206	probable fructose-bisphosphate aldolase 1, chloroplastic [Brassica oleracea var. oleracea]
GSBRNA2T00108101001	BnaC04g33570D	236	C	chloroplast	0.477	0.196	0.483	0.414	0.47	0.804	probable fructose-bisphosphate aldolase 1, chloroplastic [Brassica oleracea var. oleracea]
GSBRNA2T00108104001	BnaC04g33600D	196	C	chloroplast	0.206	0.348	0.218	0.268	0.357	0.271	epimerase family protein SDR39U1 homolog, chloroplastic [Brassica oleracea var. oleracea]
GSBRNA2T00108116001	BnaC04g33690D	183	C	chloroplast	0.15	0.141	0.344	0.386	0.222	0.479	triosephosphate isomerase, chloroplastic [Brassica napus]
GSBRNA2T00108116001	BnaC04g33690D	200	C	chloroplast	0.112	0.126	0.084	0.171	0.195	0.165	triosephosphate isomerase, chloroplastic [Brassica napus]
GSBRNA2T00108334001	BnaC02g36030D	444	C	nucleus	0.372	0.369	0.497	0.341	0.442	0.565	dihomomethionine N-hydroxylase-like [Brassica oleracea var. oleracea]
GSBRNA2T00108798001	BnaC09g27610D	216	C	cytoplasm	0.131	0.138	0.147	0.098	0.099	0.067	ribulose 1,5-bisphosphate carboxylase/oxygenase large subunit (chloroplast) [Brassica juncea]
GSBRNA2T00108800001	BnaC09g27590D	91	C	chloroplast	0.076	0.02	0.056	0.136	0.063		ATP synthase subunit beta, chloroplastic [Brassica napus]
GSBRNA2T00108809001	BnaC09g27530D	496	C	cytoplasm	0.139	0.148	0.149	0.202	0.221	0.196	PSI P700 apoprotein A2 (chloroplast) [Aethionema grandiflorum]
GSBRNA2T00108809001	BnaC09g27530D	664	C	cytoplasm	0.311	0.284	0.178	0.248	0.367	0.337	PSI P700 apoprotein A2 (chloroplast) [Aethionema grandiflorum]
GSBRNA2T00109139001	BnaC08g24170D	117	C	chloroplast	0.797	0.765		1.226	1.188		peroxiredoxin-2E, chloroplastic [Brassica oleracea var. oleracea]
GSBRNA2T00109443001	BnaC09g03260D	98	C	nucleus	0.182		0.136	0.185		0.158	---
GSBRNA2T00109489001	BnaC09g02870D	132	C	mitochondria		0.235			0.268		30S ribosomal protein S1, chloroplastic-like [Brassica rapa]
GSBRNA2T00109513001	BnaC09g02690D	154	C	nucleus	0.483		0.44	0.641		0.59	ATP-citrate synthase beta chain protein 2 [Brassica oleracea var. oleracea]
GSBRNA2T00109705001	BnaC09g01160D	121	C	chloroplast	0.109	0.112					light-regulated protein-like [Brassica napus]
GSBRNA2T00109705001	BnaC09g01160D	129	C	chloroplast	0.109	0.112					light-regulated protein-like [Brassica napus]
GSBRNA2T00109816001	BnaA06g21600D	37	C	plasma membrane	0.134	0.13		0.028	0.025		post-GPI attachment to proteins factor 3-like [Brassica napus]
GSBRNA2T00109816001	BnaA06g21600D	41	C	plasma membrane	0.134	0.13		0.028	0.025		post-GPI attachment to proteins factor 3-like [Brassica napus]
GSBRNA2T00110197001	BnaA10g07870D	40	C	chloroplast	0.17	0.29	0.208	0.278	0.331	0.214	40S ribosomal protein S20-1-like [Brassica napus]
GSBRNA2T00110197001	BnaA10g07870D	74	C	chloroplast	0.345		0.278	0.556		0.416	40S ribosomal protein S20-1-like [Brassica napus]
GSBRNA2T00110231001	BnaA10g07650D	146	C	cytoplasm					0.08		sorbitol dehydrogenase [Raphanus sativus]
GSBRNA2T00110231001	BnaA10g07650D	156	C	cytoplasm					0.08		sorbitol dehydrogenase [Raphanus sativus]
GSBRNA2T00110231001	BnaA10g07650D	300	C	cytoplasm			0.47		0.435	0.63	sorbitol dehydrogenase [Raphanus sativus]
GSBRNA2T00110662001	BnaC03g37600D	297	C	chloroplast		0.461	0.746		0.842	0.809	endochitinase CH25-like [Brassica napus]
GSBRNA2T00110662001	BnaC03g37600D	310	C	chloroplast		0.461	0.746		0.842	0.809	endochitinase CH25-like [Brassica napus]
GSBRNA2T00110752001	BnaCnng00310D	91	C	cytoplasm	0.276	0.313		0.349	0.399		---
GSBRNA2T00110752001	BnaCnng00310D	98	C	cytoplasm	0.276	0.313		0.349	0.399		---
GSBRNA2T00110776001	BnaCnng00430D	131	C	chloroplast	0.215			0.557			glucose-1-phosphate adenylyltransferase small subunit, chloroplastic-like [Brassica napus]
GSBRNA2T00110926001	BnaC05g42770D	23	C	chloroplast	0.357	0.304		0.428	0.401		ATPase ASNA1 homolog 2-like [Brassica napus]
GSBRNA2T00110968001	BnaC05g42430D	13	C	chloroplast	0.173	0.224		0.368	0.309		copper transport protein ATX1 [Brassica napus]
GSBRNA2T00110968001	BnaC05g42430D	16	C	chloroplast	0.173	0.224		0.368	0.309		copper transport protein ATX1 [Brassica napus]
GSBRNA2T00110989001	BnaC05g42240D	230	C	mitochondria	0.204	0.139		0.423	0.29	0.3	superoxide dismutase [Mn] 1, mitochondrial-like [Brassica napus]
GSBRNA2T00111075001	BnaC05g41590D	235	C	chloroplast	0.106	0.065		0.214	0.247	0.085	2-Cys peroxiredoxin BAS1, chloroplastic-like isoform X2 [Brassica napus]
GSBRNA2T00111266001	BnaA04g06420D	268	C	cytoplasm		0.319			0.455		adenosylhomocysteinase 1 isoform X2 [Brassica napus]
GSBRNA2T00111565001	BnaA03g31890D	274	C	chloroplast	0.274	0.203	0.327	0.346	0.379	0.322	2-Cys peroxiredoxin BAS1, chloroplastic-like [Brassica oleracea var. oleracea]
GSBRNA2T00111876001	BnaA03g29270D	121	C	cytoplasm	0.289	0.27	0.262	0.392	0.395	0.375	T-complex protein 1 subunit gamma [Brassica napus]
GSBRNA2T00112216001	BnaA03g26530D	20	C	cytoplasm			0.121				---
GSBRNA2T00112216001	BnaA03g26530D	31	C	cytoplasm			0.121				---
GSBRNA2T00112445001	BnaA07g12170D	525	C	chloroplast		0.388			0.504		zeaxanthin epoxidase, chloroplastic [Brassica napus]
GSBRNA2T00112872001	BnaC06g27910D	247	C	chloroplast	0.578	0.773	0.951	0.752	0.653	1.099	delta-aminolevulinic acid dehydratase 1, chloroplastic-like [Brassica napus]
GSBRNA2T00112939001	BnaC06g28360D	104	C	chloroplast	0.536	0.51	0.338	0.634	0.583	0.645	probable lactoylglutathione lyase, chloroplast [Brassica napus]
GSBRNA2T00112939001	BnaC06g28360D	215	C	chloroplast	0.353	0.348	0.288	0.434	0.347	0.391	probable lactoylglutathione lyase, chloroplast [Brassica napus]
GSBRNA2T00112939001	BnaC06g28360D	324	C	chloroplast			0.166		0.29	0.233	probable lactoylglutathione lyase, chloroplast [Brassica napus]
GSBRNA2T00112973001	BnaC06g28580D	208	C	nucleus	0.269	0.225		0.359	0.373		Cysteine/Histidine-rich C1 domain family protein [Arabidopsis thaliana]
GSBRNA2T00113550001	BnaA03g40170D	82	C	chloroplast	0.134	0.122	0.131	0.07	0.101	0.054	ribulose-phosphate 3-epimerase, chloroplastic-like [Brassica napus]
GSBRNA2T00113550001	BnaA03g40170D	85	C	chloroplast	0.134	0.122	0.131	0.07	0.101	0.054	ribulose-phosphate 3-epimerase, chloroplastic-like [Brassica napus]
GSBRNA2T00113550001	BnaA03g40170D	147	C	chloroplast	0.179			0.199			ribulose-phosphate 3-epimerase, chloroplastic-like [Brassica napus]
GSBRNA2T00113613001	BnaA03g39650D	331	C	chloroplast	0.236	0.165	0.204	0.266	0.215	0.256	calcium sensing receptor, chloroplastic [Brassica napus]
GSBRNA2T00114076001	BnaA08g00590D	58	C	plasma membrane	0.307			0.325			protein YLS3-like [Brassica napus]
GSBRNA2T00114076001	BnaA08g00590D	59	C	plasma membrane	0.307			0.325			protein YLS3-like [Brassica napus]
GSBRNA2T00114136001	BnaA08g01010D	229	C	cytoplasm	0.222			0.383			26S protease regulatory subunit 7 homolog A-like [Brassica rapa]
GSBRNA2T00114226001	BnaA08g01520D	41	C	mitochondria	0.198	0.173	0.155	0.337	0.264	0.184	60S ribosomal protein L37-2-like [Brassica napus]
GSBRNA2T00114226001	BnaA08g01520D	44	C	mitochondria	0.198	0.173	0.155	0.337	0.264	0.184	60S ribosomal protein L37-2-like [Brassica napus]
GSBRNA2T00114434001	BnaA04g08680D	99	C	chloroplast	0.345	0.41		0.439	0.603		14-3-3-like protein GF14 psi isoform X1 [Brassica napus]
GSBRNA2T00114447001	BnaA04g08570D	96	C	chloroplast	0.089	0.107	0.098	0.127	0.147	0.143	ribulose bisphosphate carboxylase small chain, chloroplastic [Brassica napus]
GSBRNA2T00114447001	BnaA04g08570D	132	C	chloroplast	0.165	0.099	0.148	0.264	0.247	0.248	ribulose bisphosphate carboxylase small chain, chloroplastic [Brassica napus]
GSBRNA2T00114447001	BnaA04g08570D	145	C	chloroplast	0.948			0.858			ribulose bisphosphate carboxylase small chain, chloroplastic [Brassica napus]
GSBRNA2T00114447001	BnaA04g08570D	167	C	chloroplast	0.064	0.096	0.126	0.103	0.167	0.196	ribulose bisphosphate carboxylase small chain, chloroplastic [Brassica napus]
GSBRNA2T00114576001	BnaA04g07760D	229	C	chloroplast	0.164	0.198	0.282	0.191	0.241	0.359	phosphoglycolate phosphatase 1B, chloroplastic [Brassica napus]
GSBRNA2T00114576001	BnaA04g07760D	236	C	chloroplast		0.235			0.284		phosphoglycolate phosphatase 1B, chloroplastic [Brassica napus]
GSBRNA2T00114576001	BnaA04g07760D	269	C	chloroplast		0.343			0.299		phosphoglycolate phosphatase 1B, chloroplastic [Brassica napus]
GSBRNA2T00114576001	BnaA04g07760D	299	C	chloroplast	0.48	0.432	0.411	0.518	0.453	0.377	phosphoglycolate phosphatase 1B, chloroplastic [Brassica napus]
GSBRNA2T00114576001	BnaA04g07760D	317	C	chloroplast		0.939	1.037	0.282	1.092	0.974	phosphoglycolate phosphatase 1B, chloroplastic [Brassica napus]
GSBRNA2T00114639001	BnaA04g07450D	148	C	chloroplast	0.087	0.089			0.092	0.045	glutamine synthetase, chloroplastic [Brassica napus]
GSBRNA2T00114639001	BnaA04g07450D	304	C	chloroplast		0.097	0.182		0.442	0.369	glutamine synthetase, chloroplastic [Brassica napus]
GSBRNA2T00114885001	BnaC02g07040D	13	C	cytoplasm	0.336	0.241	0.373	0.516	0.419	0.493	nitrilase 2-like [Brassica oleracea var. oleracea]
GSBRNA2T00114885001	BnaC02g07040D	156	C	cytoplasm		0.124		0.088	0.37		nitrilase 2-like [Brassica oleracea var. oleracea]
GSBRNA2T00114885001	BnaC02g07040D	181	C	cytoplasm	0.442			0.564			nitrilase 2-like [Brassica oleracea var. oleracea]
GSBRNA2T00114982001	BnaC02g10840D	331	C	nucleus	1.368			1.526			histone-binding protein MSI1-like [Brassica napus]
GSBRNA2T00114982001	BnaC02g10840D	332	C	nucleus	1.368			1.526			histone-binding protein MSI1-like [Brassica napus]
GSBRNA2T00114988001	BnaC02g10780D	417	C	chloroplast	0.16		0.241	0.155			---
GSBRNA2T00114988001	BnaC02g10780D	429	C	chloroplast	0.16		0.241	0.155			---
GSBRNA2T00115207001	BnaC04g25490D	67	C	chloroplast	0.341	0.362	0.29	0.374	0.504	0.456	triosephosphate isomerase, cytosolic-like [Brassica napus]
GSBRNA2T00115207001	BnaC04g25490D	127	C	chloroplast				0.047	0.16		triosephosphate isomerase, cytosolic-like [Brassica napus]
GSBRNA2T00115207001	BnaC04g25490D	218	C	chloroplast						0.447	triosephosphate isomerase, cytosolic-like [Brassica napus]
GSBRNA2T00115210001	BnaC04g25470D	67	C	cytoplasm			0.06			0.155	---
GSBRNA2T00115210001	BnaC04g25470D	126	C	cytoplasm			0.119			0.2	---
GSBRNA2T00115416001	BnaC07g21510D	43	C	extracellular	0.148	0.099	0.104	0.02			defensin-like protein 1 [Brassica napus]
GSBRNA2T00115416001	BnaC07g21510D	49	C	extracellular	0.148	0.099	0.104	0.02			defensin-like protein 1 [Brassica napus]
GSBRNA2T00115416001	BnaC07g21510D	53	C	extracellular	0.148	0.099	0.104	0.02			defensin-like protein 1 [Brassica napus]
GSBRNA2T00115679001	BnaC09g19620D	54	C	nucleus	0.535			0.573			abscisic acid receptor PYR1-like [Raphanus sativus]
GSBRNA2T00115742001	BnaC09g19280D	128	C	chloroplast	0.334	0.307		0.455	0.356		3-oxoacyl-[acyl-carrier-protein] synthase I, chloroplastic-like [Brassica napus]
GSBRNA2T00115742001	BnaC09g19280D	132	C	chloroplast	0.37	0.447	0.354	0.495	0.606	0.516	3-oxoacyl-[acyl-carrier-protein] synthase I, chloroplastic-like [Brassica napus]
GSBRNA2T00116060001	BnaC01g16690D	122	C	chloroplast					0.196		argininosuccinate synthase, chloroplastic [Brassica napus]
GSBRNA2T00116060001	BnaC01g16690D	126	C	chloroplast					0.196		argininosuccinate synthase, chloroplastic [Brassica napus]
GSBRNA2T00116060001	BnaC01g16690D	170	C	chloroplast		0.547			0.698		argininosuccinate synthase, chloroplastic [Brassica napus]
GSBRNA2T00116192001	BnaC01g15720D	227	C	chloroplast	0.762			0.709			NAD(P)H-quinone oxidoreductase subunit S, chloroplastic [Brassica oleracea var. oleracea]
GSBRNA2T00116295001	BnaC03g68250D	191	C	chloroplast	0.359	0.351	0.411	0.404	0.379	0.645	threonine synthase 1, chloroplastic-like [Brassica oleracea var. oleracea]
GSBRNA2T00116295001	BnaC03g68250D	492	C	chloroplast	0.384		0.336	0.572		0.52	threonine synthase 1, chloroplastic-like [Brassica oleracea var. oleracea]
GSBRNA2T00116696001	BnaA05g04770D	38	C	nucleus	0.271	0.275	0.265	0.423	0.33	0.347	40S ribosomal protein S13-2-like [Brassica napus]
GSBRNA2T00116782001	BnaA05g05540D	140	C	plasma membrane		0.255			0.32		---
GSBRNA2T00116809001	BnaA05g05760D	598	C	endoplasmic reticulum	0.149	0.235	0.234	0.242	0.311	0.248	delta-1-pyrroline-5-carboxylate synthase A-like [Brassica napus]
GSBRNA2T00116818001	BnaA05g05840D	217	C	chloroplast		0.533			0.641		ribulose bisphosphate carboxylase/oxygenase activase, chloroplastic-like isoform X1 [Brassica napus]
GSBRNA2T00116818001	BnaA05g05840D	464	C	chloroplast	0.212	0.261	0.187	0.295	0.415	0.422	ribulose bisphosphate carboxylase/oxygenase activase, chloroplastic-like isoform X1 [Brassica napus]
GSBRNA2T00117151001	BnaC01g28900D	70	C	chloroplast	0.115	0.093	0.061	0.012			ferredoxin, leaf L-A-like [Brassica napus]
GSBRNA2T00117151001	BnaC01g28900D	91	C	chloroplast	0.115	0.093	0.061	0.012			ferredoxin, leaf L-A-like [Brassica napus]
GSBRNA2T00117151001	BnaC01g28900D	96	C	chloroplast	0.115	0.199	0.155	0.059	0.206	0.178	ferredoxin, leaf L-A-like [Brassica napus]
GSBRNA2T00117151001	BnaC01g28900D	99	C	chloroplast	0.115	0.199	0.155	0.059	0.206	0.178	ferredoxin, leaf L-A-like [Brassica napus]
GSBRNA2T00117685001	BnaC02g37910D	878	C	chloroplast	0.54			0.596			alpha-glucan phosphorylase 1-like isoform X1 [Brassica napus]
GSBRNA2T00118674001	BnaA07g13330D	375	C	chloroplast		0.291			0.471		flagellar radial spoke protein 5 [Brassica rapa]
GSBRNA2T00118676001	BnaA07g13340D	52	C	chloroplast	0.29	0.317	0.233	0.403	0.413	0.385	60S acidic ribosomal protein P2-2-like [Brassica napus]
GSBRNA2T00118698001	BnaA07g13530D	558	C	chloroplast	0.653			0.913			---
GSBRNA2T00118903001	BnaC09g25440D	87	C	chloroplast		0.431			0.74		---
GSBRNA2T00118970001	BnaC09g25210D	105	C	chloroplast			0.471			0.493	L-ascorbate peroxidase S, chloroplastic/mitochondrial-like isoform X1 [Brassica napus]
GSBRNA2T00119372001	BnaC05g18600D	379	C	cytoplasm	0.564		0.327	0.412		0.538	glutamate--glyoxylate aminotransferase 1-like [Brassica napus]
GSBRNA2T00119392001	BnaC05g18490D	225	C	chloroplast	0.178	0.842	0.153	0.353	0.861	0.452	probable phosphoglucomutase, cytoplasmic 1 [Brassica napus]
GSBRNA2T00119392001	BnaC05g18490D	381	C	chloroplast		0.068			0.132		probable phosphoglucomutase, cytoplasmic 1 [Brassica napus]
GSBRNA2T00119392001	BnaC05g18490D	384	C	chloroplast		0.068			0.132		probable phosphoglucomutase, cytoplasmic 1 [Brassica napus]
GSBRNA2T00119583001	BnaAnng00480D	36	C	cytoplasm	1.636	1.581	1.602	0.824	0.978	0.833	glutathione S-transferase L3 [Brassica rapa]
GSBRNA2T00119705001	BnaAnng01570D	38	C	mitochondria	0.618	0.535		0.513	0.725		---
GSBRNA2T00119707001	BnaAnng01590D	189	C	chloroplast			0.609			0.453	tropinone reductase homolog At5g06060-like [Brassica napus]
GSBRNA2T00119980001	BnaC05g46270D	50	C	cytoplasm	0.334	0.317	0.308	0.387	0.356	0.454	26S protease regulatory subunit 6A homolog [Brassica napus]
GSBRNA2T00119982001	BnaC05g46250D	22	C	nucleus	0.327	0.358	0.484	0.675	0.516	0.557	60S ribosomal protein L22-2-like [Brassica napus]
GSBRNA2T00120038001	BnaC05g45770D	89	C	mitochondria	0.847	0.723		0.699	0.927		peroxiredoxin-2F, mitochondrial [Brassica napus]
GSBRNA2T00120302001	BnaC02g41150D	59	C	cytoplasm			0.331			0.506	ribosomal protein S11 (chloroplast) [Camelina sativa]
GSBRNA2T00120820001	BnaC07g00480D	160	C	mitochondria	0.492	0.599		0.471	0.628		succinyl-CoA ligase [ADP-forming] subunit beta, mitochondrial-like [Brassica napus]
GSBRNA2T00121192001	BnaA01g03860D	105	C	mitochondria	0.159			0.221			---
GSBRNA2T00121192001	BnaA01g03860D	252	C	mitochondria	0.09			0.063			---
GSBRNA2T00121192001	BnaA01g03860D	260	C	mitochondria	0.09			0.063			---
GSBRNA2T00121192001	BnaA01g03860D	283	C	mitochondria	0.086						---
GSBRNA2T00121192001	BnaA01g03860D	287	C	mitochondria	0.086						---
GSBRNA2T00121192001	BnaA01g03860D	409	C	mitochondria	0.309			0.681			---
GSBRNA2T00121192001	BnaA01g03860D	470	C	mitochondria	0.225			0.32			---
GSBRNA2T00121192001	BnaA01g03860D	576	C	mitochondria	0.061			0.102			---
GSBRNA2T00121192001	BnaA01g03860D	585	C	mitochondria	0.061			0.102			---
GSBRNA2T00121192001	BnaA01g03860D	671	C	mitochondria	0.085			0.127			---
GSBRNA2T00121192001	BnaA01g03860D	688	C	mitochondria	0.085			0.127			---
GSBRNA2T00121192001	BnaA01g03860D	741	C	mitochondria				0.241			---
GSBRNA2T00121192001	BnaA01g03860D	784	C	mitochondria	0.618			0.51			---
GSBRNA2T00121192001	BnaA01g03860D	950	C	mitochondria	0.106			0.152			---
GSBRNA2T00121192001	BnaA01g03860D	1029	C	mitochondria	0.523			0.246			---
GSBRNA2T00121224001	BnaA01g03560D	108	C	chloroplast	0.215			0.286			protein TIC 22, chloroplastic-like [Brassica napus]
GSBRNA2T00121621001	BnaA01g00170D	125	C	mitochondria	0.244			0.314			serine hydroxymethyltransferase 1, mitochondrial [Brassica oleracea var. oleracea]
GSBRNA2T00122300001	BnaA09g48390D	201	C	cytoplasm	0.481	0.385		0.589	0.475		leucine--tRNA ligase, cytoplasmic-like [Brassica napus]
GSBRNA2T00122300001	BnaA09g48390D	574	C	cytoplasm	0.268	0.325		0.41	0.416		leucine--tRNA ligase, cytoplasmic-like [Brassica napus]
GSBRNA2T00122348001	BnaC05g31450D	353	C	endoplasmic reticulum	0.215	0.229		0.29	0.307		DNA-damage-repair/toleration protein DRT100 [Brassica oleracea var. oleracea]
GSBRNA2T00122348001	BnaC05g31450D	355	C	endoplasmic reticulum	0.215	0.229		0.29	0.307		DNA-damage-repair/toleration protein DRT100 [Brassica oleracea var. oleracea]
GSBRNA2T00122736001	BnaC02g13210D	118	C	chloroplast		0.125			0.213	0.128	trigger factor-like protein TIG, Chloroplastic isoform X2 [Brassica napus]
GSBRNA2T00122736001	BnaC02g13210D	121	C	chloroplast		0.125			0.213	0.128	trigger factor-like protein TIG, Chloroplastic isoform X2 [Brassica napus]
GSBRNA2T00122736001	BnaC02g13210D	353	C	chloroplast	0.464		0.371	0.557		0.457	trigger factor-like protein TIG, Chloroplastic isoform X2 [Brassica napus]
GSBRNA2T00122736001	BnaC02g13210D	390	C	chloroplast	0.41			0.531			trigger factor-like protein TIG, Chloroplastic isoform X2 [Brassica napus]
GSBRNA2T00122973001	BnaA10g05390D	153	C	extracellular	0.082	0.066		0.073	0.113		cysteine proteinase RD21A [Brassica rapa]
GSBRNA2T00122973001	BnaA10g05390D	156	C	extracellular	0.082	0.066		0.073	0.113		cysteine proteinase RD21A [Brassica rapa]
GSBRNA2T00123111001	BnaC01g09420D	528	C	chloroplast	0.468	0.452	0.423	0.632	0.538	0.625	altered inheritance of mitochondria protein 21 [Brassica rapa]
GSBRNA2T00123160001	BnaC01g09740D	91	C	chloroplast	0.128	0.15	0.101	0.065	0.128	0.061	glutaredoxin-C5, chloroplastic-like [Brassica napus]
GSBRNA2T00123160001	BnaC01g09740D	94	C	chloroplast	0.128	0.15	0.101	0.065	0.128	0.061	glutaredoxin-C5, chloroplastic-like [Brassica napus]
GSBRNA2T00123160001	BnaC01g09740D	149	C	chloroplast	0.207	0.218		0.284	0.267		glutaredoxin-C5, chloroplastic-like [Brassica napus]
GSBRNA2T00123191001	BnaA04g24120D	152	C	cytoplasm	0.299	0.341		0.49	0.565		40S ribosomal protein S2-2-like [Brassica napus]
GSBRNA2T00123191001	BnaA04g24120D	207	C	cytoplasm	0.677			0.833			40S ribosomal protein S2-2-like [Brassica napus]
GSBRNA2T00123293001	BnaA04g23300D	83	C	chloroplast	0.422		0.305	0.515		0.401	---
GSBRNA2T00123973001	BnaC03g40270D	328	C	cytoplasm	1.359	1.412	1.412	2.23	2.171	2.166	putative F-box protein At3g17560 [Brassica napus]
GSBRNA2T00123973001	BnaC03g40270D	329	C	cytoplasm	1.359	1.412	1.412	2.23	2.171	2.166	putative F-box protein At3g17560 [Brassica napus]
GSBRNA2T00124039001	BnaC04g19270D	194	C	chloroplast		0.144			0.11		5'-adenylylsulfate reductase 2, chloroplastic [Brassica oleracea var. oleracea]
GSBRNA2T00124039001	BnaC04g19270D	195	C	chloroplast		0.144			0.11		5'-adenylylsulfate reductase 2, chloroplastic [Brassica oleracea var. oleracea]
GSBRNA2T00124391001	BnaA07g24840D	38	C	cytoplasm	0.147			0.228			---
GSBRNA2T00124391001	BnaA07g24840D	43	C	cytoplasm	0.299			0.388			---
GSBRNA2T00124391001	BnaA07g24840D	63	C	cytoplasm				0.267			---
GSBRNA2T00124391001	BnaA07g24840D	271	C	cytoplasm	0.399			0.495			---
GSBRNA2T00124471001	BnaA07g25510D	75	C	cytoskeleton	0.125	0.196		0.217	0.249		cytosolic isocitrate dehydrogenase [NADP]-like [Brassica oleracea var. oleracea]
GSBRNA2T00124471001	BnaA07g25510D	269	C	cytoskeleton	0.387	0.17	0.235	0.532	0.306	0.308	cytosolic isocitrate dehydrogenase [NADP]-like [Brassica oleracea var. oleracea]
GSBRNA2T00124689001	BnaC06g14690D	18	C	plasma membrane	0.19	0.202	0.166	0.284	0.195	0.228	PsbA (chloroplast) [Senna tora]
GSBRNA2T00124746001	BnaA03g18710D	176	C	chloroplast	0.271			0.326			ribulose bisphosphate carboxylase/oxygenase activase, chloroplastic isoform X1 [Brassica napus]
GSBRNA2T00124746001	BnaA03g18710D	224	C	chloroplast	0.132			0.007			ribulose bisphosphate carboxylase/oxygenase activase, chloroplastic isoform X1 [Brassica napus]
GSBRNA2T00124746001	BnaA03g18710D	225	C	chloroplast	0.132			0.007			ribulose bisphosphate carboxylase/oxygenase activase, chloroplastic isoform X1 [Brassica napus]
GSBRNA2T00124746001	BnaA03g18710D	452	C	chloroplast	0.042	0.045		0.065	0.046		ribulose bisphosphate carboxylase/oxygenase activase, chloroplastic isoform X1 [Brassica napus]
GSBRNA2T00124746001	BnaA03g18710D	471	C	chloroplast	0.06	0.156		0.212	0.235	0.106	ribulose bisphosphate carboxylase/oxygenase activase, chloroplastic isoform X1 [Brassica napus]
GSBRNA2T00124902001	BnaA03g17400D	48	C	chloroplast	0.846			0.94			---
GSBRNA2T00125117001	BnaC03g36060D	254	C	cytoplasm		0.293			0.417		---
GSBRNA2T00125164001	BnaC03g35690D	1245	C	chloroplast						0.185	---
GSBRNA2T00125164001	BnaC03g35690D	1248	C	chloroplast						0.185	---
GSBRNA2T00125373001	BnaA06g16270D	288	C	cytoplasm	0.493	0.459		0.774	0.722		oxalate--CoA ligase [Brassica napus]
GSBRNA2T00125493001	BnaA06g15350D	153	C	chloroplast				0.104			NAD kinase 2, chloroplastic [Brassica rapa]
GSBRNA2T00125516001	BnaA05g14110D	124	C	cytoplasm	0.392	0.275		0.512	0.39		proteasome subunit alpha type-5-A [Brassica napus]
GSBRNA2T00125570001	BnaA05g13750D	256	C	chloroplast	0.148			0.194			binding protein [Arabidopsis lyrata subsp. lyrata]
GSBRNA2T00125570001	BnaA05g13750D	257	C	chloroplast	0.148			0.194			binding protein [Arabidopsis lyrata subsp. lyrata]
GSBRNA2T00125571001	BnaA05g13740D	272	C	chloroplast	0.301	0.416	0.273	0.504	0.627	0.545	ruBisCO large subunit-binding protein subunit beta, chloroplastic-like [Brassica napus]
GSBRNA2T00125571001	BnaA05g13740D	471	C	chloroplast	0.059	0.181	0.118	0.272	0.336	0.414	ruBisCO large subunit-binding protein subunit beta, chloroplastic-like [Brassica napus]
GSBRNA2T00125571001	BnaA05g13740D	559	C	chloroplast	0.493	0.493	0.328	0.43	0.411	0.27	ruBisCO large subunit-binding protein subunit beta, chloroplastic-like [Brassica napus]
GSBRNA2T00125571001	BnaA05g13740D	560	C	chloroplast	0.493	0.493	0.328	0.43	0.411	0.27	ruBisCO large subunit-binding protein subunit beta, chloroplastic-like [Brassica napus]
GSBRNA2T00126221001	BnaA04g02660D	127	C	chloroplast	0.528			0.646			psbP domain-containing protein 6, chloroplastic [Brassica rapa]
GSBRNA2T00126306001	BnaA04g03290D	368	C	cytoplasm		0.254			0.389		heat shock 70 kDa protein 15 isoform X2 [Brassica napus]
GSBRNA2T00126364001	BnaA04g03590D	67	C	cytoplasm		0.042		0.173	0.162		triosephosphate isomerase, cytosolic-like [Brassica napus]
GSBRNA2T00126364001	BnaA04g03590D	127	C	cytoplasm	0.075	0.14		0.205	0.259		triosephosphate isomerase, cytosolic-like [Brassica napus]
GSBRNA2T00126387001	BnaA04g03770D	199	C	chloroplast	0.181			0.22			calcium homeostasis regulator [Arabidopsis thaliana]
GSBRNA2T00126387001	BnaA04g03770D	200	C	chloroplast	0.181			0.22			calcium homeostasis regulator [Arabidopsis thaliana]
GSBRNA2T00126443001	BnaA04g04140D	145	C	chloroplast	0.134	0.106	0.111	0.135	0.14	0.111	protein ASPARTIC PROTEASE IN GUARD CELL 2-like [Brassica napus]
GSBRNA2T00126443001	BnaA04g04140D	150	C	chloroplast	0.134	0.106	0.111	0.135	0.14	0.111	protein ASPARTIC PROTEASE IN GUARD CELL 2-like [Brassica napus]
GSBRNA2T00126637001	BnaA08g11250D	117	C	chloroplast	0.289		0.357	0.424		0.525	4-hydroxy-3-methylbut-2-enyl diphosphate reductase, chloroplastic [Brassica napus]
GSBRNA2T00126663001	BnaA08g11040D	154	C	cytoplasm	0.216	0.312		0.244	0.434		40S ribosomal protein S3a-2-like [Brassica napus]
GSBRNA2T00126705001	BnaA08g10700D	212	C	chloroplast	0.209			0.283			isocitrate dehydrogenase [NAD] regulatory subunit 1, mitochondrial [Brassica oleracea var.oleracea]
GSBRNA2T00127069001	BnaC08g31970D	124	C	chloroplast	0.16	0.342	0.13	0.16	0.4	0.126	peptidyl-prolyl cis-trans isomerase CYP20-3, chloroplastic [Brassica oleracea var. oleracea]
GSBRNA2T00127069001	BnaC08g31970D	199	C	chloroplast	0.432	0.528		0.27	0.615		peptidyl-prolyl cis-trans isomerase CYP20-3, chloroplastic [Brassica oleracea var. oleracea]
GSBRNA2T00127069001	BnaC08g31970D	246	C	chloroplast	0.067	0.175	0.129	0.157	0.174	0.121	peptidyl-prolyl cis-trans isomerase CYP20-3, chloroplastic [Brassica oleracea var. oleracea]
GSBRNA2T00127099001	BnaC08g32210D	116	C	chloroplast	0.346	0.386		0.404	0.369		calvin cycle protein CP12-2, chloroplastic [Brassica napus]
GSBRNA2T00127099001	BnaC08g32210D	125	C	chloroplast	0.19	0.037		0.213	0.081	0.104	calvin cycle protein CP12-2, chloroplastic [Brassica napus]
GSBRNA2T00127135001	BnaC08g32480D	14	C	cytoplasm		0.093			0.073		NADH dehydrogenase [ubiquinone] iron-sulfur protein 5-B-like [Brassica napus]
GSBRNA2T00127135001	BnaC08g32480D	24	C	cytoplasm		0.093			0.073		NADH dehydrogenase [ubiquinone] iron-sulfur protein 5-B-like [Brassica napus]
GSBRNA2T00127135001	BnaC08g32480D	28	C	cytoplasm		0.093			0.073		NADH dehydrogenase [ubiquinone] iron-sulfur protein 5-B-like [Brassica napus]
GSBRNA2T00127184001	BnaC08g32860D	733	C	cytoplasm	0.795			0.807			protein transport protein SEC31 homolog B-like [Brassica oleracea var. oleracea]
GSBRNA2T00127351001	BnaC08g34300D	110	C	chloroplast	0.331			0.506			nucleoid-associated protein PCC8801_2554-like [Brassica napus]
GSBRNA2T00127623001	BnaC04g38460D	153	C	cytoplasm	0.407			0.344			AB hydrolase superfamily protein YfhM-like [Brassica oleracea var. oleracea]
GSBRNA2T00127632001	BnaC04g38540D	186	C	cytoskeleton	0.565			0.778			proteasome subunit alpha type-3-like [Brassica napus]
GSBRNA2T00127736001	BnaC04g39260D	17	C	chloroplast	0.337	0.467	0.279	0.41	0.528	0.532	60S acidic ribosomal protein P2-2-like [Brassica napus]
GSBRNA2T00128504001	BnaA07g07220D	57	C	cytoskeleton		0.133			0.435		obg-like ATPase 1 [Brassica napus]
GSBRNA2T00128504001	BnaA07g07220D	77	C	cytoskeleton	0.235			0.276			obg-like ATPase 1 [Brassica napus]
GSBRNA2T00128690001	BnaC07g19610D	299	C	chloroplast	0.134	0.15		0.136	0.129		60S ribosomal protein L3-1 [Brassica napus]
GSBRNA2T00128690001	BnaC07g19610D	300	C	chloroplast	0.134	0.15		0.136	0.129		60S ribosomal protein L3-1 [Brassica napus]
GSBRNA2T00129140001	BnaC03g53110D	213	C	chloroplast			0.159			0.185	---
GSBRNA2T00129140001	BnaC03g53110D	255	C	chloroplast			0.188			0.471	---
GSBRNA2T00129140001	BnaC03g53110D	275	C	chloroplast			0.351			0.494	---
GSBRNA2T00129290001	BnaA09g32110D	76	C	extracellular	0.122	0.111		0.082	0.086		non-specific lipid-transfer protein 5 [Brassica napus]
GSBRNA2T00129427001	BnaA09g33250D	68	C	peroxisome			0.178			0.22	---
GSBRNA2T00129427001	BnaA09g33250D	69	C	peroxisome			0.178			0.22	---
GSBRNA2T00129434001	BnaA09g33290D	197	C	cytoplasm	0.355	0.48	0.832	0.439	0.545	1.15	fructose-bisphosphate aldolase, cytoplasmic isozyme-like [Brassica napus]
GSBRNA2T00129440001	BnaA09g33340D	229	C	cytoplasm	0.271	0.236	0.214	0.288	0.267	0.264	pyruvate kinase, cytosolic isozyme-like [Brassica napus]
GSBRNA2T00129484001	BnaA09g33730D	137	C	cytoplasm	0.106		0.141				60S ribosomal protein L12-2-like [Brassica rapa]
GSBRNA2T00129484001	BnaA09g33730D	142	C	cytoplasm	0.106		0.141				60S ribosomal protein L12-2-like [Brassica rapa]
GSBRNA2T00129561001	BnaA09g34280D	146	C	vacuolar membrane	0.353	0.448	0.508	0.352	0.58	0.58	protein ASPARTIC PROTEASE IN GUARD CELL 2-like [Brassica napus]
GSBRNA2T00129561001	BnaA09g34280D	151	C	vacuolar membrane	0.353	0.448	0.508	0.352	0.58	0.58	protein ASPARTIC PROTEASE IN GUARD CELL 2-like [Brassica napus]
GSBRNA2T00129587001	BnaA09g34470D	140	C	chloroplast	0.357	0.321		0.646	0.771	0.58	tryptophan synthase alpha chain, chloroplastic-like [Brassica napus]
GSBRNA2T00129620001	BnaA09g34720D	91	C	chloroplast	0.189	0.141	0.233	0.194	0.168	0.265	chlorophyll a-b binding protein 6, chloroplastic isoform X1 [Brassica rapa]
GSBRNA2T00129908001	BnaA03g04200D	248	C	chloroplast	0.252			0.394		0.29	photosynthetic NDH subunit of lumenal location 5, chloroplastic [Brassica napus]
GSBRNA2T00130348001	BnaC01g07810D	100	C	cytoplasm	0.255			0.265			putative glutamine amidotransferase-like protein C13C5.04 [Brassica napus]
GSBRNA2T00130348001	BnaC01g07810D	239	C	cytoplasm	0.307			0.506			putative glutamine amidotransferase-like protein C13C5.04 [Brassica napus]
GSBRNA2T00130384001	BnaC01g07500D	367	C	chloroplast		0.528	0.636		0.967	0.792	leucine aminopeptidase 3, chloroplastic [Brassica oleracea var. oleracea]
GSBRNA2T00130384001	BnaC01g07500D	450	C	chloroplast	0.476	0.406		0.533	0.464	0.389	leucine aminopeptidase 3, chloroplastic [Brassica oleracea var. oleracea]
GSBRNA2T00130426001	BnaC01g07210D	56	C	cytoplasm	0.227	0.255	0.325	0.339	0.392	0.377	proteasome subunit beta type-6 [Brassica napus]
GSBRNA2T00130664001	BnaC01g05300D	73	C	vacuolar membrane	0.363		0.723	0.426		0.716	vacuolar-processing enzyme gamma-isozyme [Brassica napus]
GSBRNA2T00130674001	BnaC01g05230D	106	C	mitochondria		0.04			0.161	0.108	glycine dehydrogenase (decarboxylating) 1, mitochondrial [Brassica rapa]
GSBRNA2T00130674001	BnaC01g05230D	253	C	mitochondria		0.116	0.129		0.086	0.067	glycine dehydrogenase (decarboxylating) 1, mitochondrial [Brassica rapa]
GSBRNA2T00130674001	BnaC01g05230D	261	C	mitochondria		0.116	0.129		0.086	0.067	glycine dehydrogenase (decarboxylating) 1, mitochondrial [Brassica rapa]
GSBRNA2T00130674001	BnaC01g05230D	284	C	mitochondria		0.035					glycine dehydrogenase (decarboxylating) 1, mitochondrial [Brassica rapa]
GSBRNA2T00130674001	BnaC01g05230D	288	C	mitochondria		0.035					glycine dehydrogenase (decarboxylating) 1, mitochondrial [Brassica rapa]
GSBRNA2T00130674001	BnaC01g05230D	410	C	mitochondria		0.271				0.589	glycine dehydrogenase (decarboxylating) 1, mitochondrial [Brassica rapa]
GSBRNA2T00130674001	BnaC01g05230D	471	C	mitochondria		0.319	0.213		0.343	0.25	glycine dehydrogenase (decarboxylating) 1, mitochondrial [Brassica rapa]
GSBRNA2T00130674001	BnaC01g05230D	577	C	mitochondria		0.113	0.12		0.197	0.087	glycine dehydrogenase (decarboxylating) 1, mitochondrial [Brassica rapa]
GSBRNA2T00130674001	BnaC01g05230D	586	C	mitochondria		0.113	0.12		0.197	0.087	glycine dehydrogenase (decarboxylating) 1, mitochondrial [Brassica rapa]
GSBRNA2T00130674001	BnaC01g05230D	672	C	mitochondria		0.075	0.077		0.163	0.084	glycine dehydrogenase (decarboxylating) 1, mitochondrial [Brassica rapa]
GSBRNA2T00130674001	BnaC01g05230D	689	C	mitochondria		0.075	0.077		0.163	0.084	glycine dehydrogenase (decarboxylating) 1, mitochondrial [Brassica rapa]
GSBRNA2T00130674001	BnaC01g05230D	742	C	mitochondria		0.233	0.374		0.316	0.307	glycine dehydrogenase (decarboxylating) 1, mitochondrial [Brassica rapa]
GSBRNA2T00130674001	BnaC01g05230D	785	C	mitochondria		0.513	0.298		0.526	0.336	glycine dehydrogenase (decarboxylating) 1, mitochondrial [Brassica rapa]
GSBRNA2T00130674001	BnaC01g05230D	951	C	mitochondria		0.13	0.143		0.17	0.093	glycine dehydrogenase (decarboxylating) 1, mitochondrial [Brassica rapa]
GSBRNA2T00130747001	BnaC01g04560D	449	C	chloroplast	0.194			0.228			LL-diaminopimelate aminotransferase, chloroplastic isoform X1 [Brassica oleracea var. oleracea]
GSBRNA2T00130928001	BnaC01g03120D	263	C	mitochondria	0.219	0.191	0.229	0.25	0.27	0.248	ankyrin repeat domain-containing protein 2-like isoform X1 [Brassica napus]
GSBRNA2T00130966001	BnaC01g02790D	106	C	cytoplasm	0.241			0.496			---
GSBRNA2T00131000001	BnaC01g02520D	114	C	cytoplasm	0.762			0.987			60S ribosomal protein L8-3-like [Brassica napus]
GSBRNA2T00131189001	BnaC01g01090D	125	C	mitochondria	0.28	0.297	0.237	0.358	0.361	0.218	serine hydroxymethyltransferase 1, mitochondrial-like [Brassica napus]
GSBRNA2T00131240001	BnaC01g00680D	496	C	cytoplasm	0.39			0.571			inositol-3-phosphate synthase [Brassica oleracea var. oleracea]
GSBRNA2T00131426001	BnaA01g09990D	375	C	extracellular	0.329			0.343			pectin acetylesterase 7-like [Brassica napus]
GSBRNA2T00131426001	BnaA01g09990D	380	C	extracellular	0.329			0.343			pectin acetylesterase 7-like [Brassica napus]
GSBRNA2T00131426001	BnaA01g09990D	384	C	extracellular	0.329			0.343			pectin acetylesterase 7-like [Brassica napus]
GSBRNA2T00131642001	BnaA01g11660D	144	C	chloroplast	0.43	0.537		0.574	0.43		peptide methionine sulfoxide reductase B5-like isoform X1 [Brassica napus]
GSBRNA2T00131642001	BnaA01g11660D	197	C	chloroplast	0.326	0.321		0.425	0.389		peptide methionine sulfoxide reductase B5-like isoform X1 [Brassica napus]
GSBRNA2T00131877001	BnaC06g20520D	50	C	chloroplast		0.393			0.46		probable mitochondrial adenine nucleotide transporter BTL2 [Brassica napus]
GSBRNA2T00131877001	BnaC06g20520D	52	C	chloroplast		0.393			0.46		probable mitochondrial adenine nucleotide transporter BTL2 [Brassica napus]
GSBRNA2T00131896001	BnaC06g20420D	179	C	cytoplasm	0.397	0.404	0.381	0.402	0.574	0.471	glutathione S-transferase U19 [Brassica napus]
GSBRNA2T00132137001	BnaC06g18870D	148	C	chloroplast	0.284	0.453		0.373	0.514		lipoxygenase 2, chloroplastic-like [Brassica napus]
GSBRNA2T00132137001	BnaC06g18870D	539	C	chloroplast	0.438			0.247	0.313		lipoxygenase 2, chloroplastic-like [Brassica napus]
GSBRNA2T00132779001	BnaA05g02330D	222	C	mitochondria			0.176	0.183		0.203	NADPH-dependent thioredoxin reductase 3 [Brassica rapa]
GSBRNA2T00132779001	BnaA05g02330D	225	C	mitochondria			0.176	0.183		0.203	NADPH-dependent thioredoxin reductase 3 [Brassica rapa]
GSBRNA2T00132779001	BnaA05g02330D	451	C	mitochondria	0.09	0.132	0.086		0.054	0.094	NADPH-dependent thioredoxin reductase 3 [Brassica rapa]
GSBRNA2T00132779001	BnaA05g02330D	459	C	mitochondria	0.09	0.132	0.086		0.054	0.094	NADPH-dependent thioredoxin reductase 3 [Brassica rapa]
GSBRNA2T00132779001	BnaA05g02330D	462	C	mitochondria	0.09	0.132	0.086		0.054	0.094	NADPH-dependent thioredoxin reductase 3 [Brassica rapa]
GSBRNA2T00132955001	BnaA05g00900D	573	C	plasma membrane	0.303	0.249	0.284	0.404	0.367	0.359	photosystem I P700 apoprotein A1 (chloroplast) [Brassica juncea]
GSBRNA2T00133000001	BnaA05g00550D	70	C	chloroplast		0.027			0.021		calvin cycle protein CP12-1, chloroplastic-like [Brassica napus]
GSBRNA2T00133000001	BnaA05g00550D	79	C	chloroplast		0.027			0.021		calvin cycle protein CP12-1, chloroplastic-like [Brassica napus]
GSBRNA2T00133000001	BnaA05g00550D	112	C	chloroplast	0.104	0.068		0.019			calvin cycle protein CP12-1, chloroplastic-like [Brassica napus]
GSBRNA2T00133000001	BnaA05g00550D	121	C	chloroplast	0.104	0.068		0.019			calvin cycle protein CP12-1, chloroplastic-like [Brassica napus]
GSBRNA2T00133095001	BnaC09g35690D	162	C	vacuolar membrane	0.056			0.081			thiol protease aleurain [Brassica oleracea var. oleracea]
GSBRNA2T00133095001	BnaC09g35690D	165	C	vacuolar membrane	0.056			0.081			thiol protease aleurain [Brassica oleracea var. oleracea]
GSBRNA2T00133095001	BnaC09g35690D	196	C	vacuolar membrane	0.472			0.427			thiol protease aleurain [Brassica oleracea var. oleracea]
GSBRNA2T00133095001	BnaC09g35690D	205	C	vacuolar membrane	0.472			0.427			thiol protease aleurain [Brassica oleracea var. oleracea]
GSBRNA2T00133095001	BnaC09g35690D	346	C	vacuolar membrane				0.072			thiol protease aleurain [Brassica oleracea var. oleracea]
GSBRNA2T00133095001	BnaC09g35690D	351	C	vacuolar membrane				0.072			thiol protease aleurain [Brassica oleracea var. oleracea]
GSBRNA2T00133119001	BnaC09g35580D	215	C	chloroplast	0.121	0.118	0.253	0.088	0.126	0.286	L-type lectin-domain containing receptor kinase I.7-like [Brassica napus]
GSBRNA2T00133724001	BnaC07g28480D	170	C	mitochondria	0.324			0.267			threonine--tRNA ligase, mitochondrial-like [Brassica napus]
GSBRNA2T00133724001	BnaC07g28480D	174	C	mitochondria	0.324			0.267			threonine--tRNA ligase, mitochondrial-like [Brassica napus]
GSBRNA2T00133724001	BnaC07g28480D	253	C	mitochondria	0.239	0.403	0.189	0.227	0.379	0.178	threonine--tRNA ligase, mitochondrial-like [Brassica napus]
GSBRNA2T00133724001	BnaC07g28480D	260	C	mitochondria	0.239	0.403	0.189	0.227	0.379	0.178	threonine--tRNA ligase, mitochondrial-like [Brassica napus]
GSBRNA2T00134057001	BnaC08g05690D	179	C	chloroplast				0.214	0.149		cytochrome P450 83B1 [Brassica oleracea var. oleracea]
GSBRNA2T00134057001	BnaC08g05690D	182	C	chloroplast				0.214	0.149		cytochrome P450 83B1 [Brassica oleracea var. oleracea]
GSBRNA2T00134118001	BnaC03g00020D	39	C	cytoplasm	0.608			0.724			60S acidic ribosomal protein P1-3-like [Brassica napus]
GSBRNA2T00134147001	BnaC03g00280D	56	C	cytoplasm	0.434		0.455	0.55		0.608	pyridoxal 5'-phosphate synthase subunit PDX1.3-like [Brassica napus]
GSBRNA2T00134147001	BnaC03g00280D	143	C	cytoplasm	0.159		0.146	0.078		0.05	pyridoxal 5'-phosphate synthase subunit PDX1.3-like [Brassica napus]
GSBRNA2T00134147001	BnaC03g00280D	145	C	cytoplasm	0.159		0.146	0.078		0.05	pyridoxal 5'-phosphate synthase subunit PDX1.3-like [Brassica napus]
GSBRNA2T00134237001	BnaC03g00960D	101	C	cytoplasm			0.406			0.637	60S ribosomal protein L4-1-like [Brassica oleracea var. oleracea]
GSBRNA2T00134237001	BnaC03g00960D	236	C	cytoplasm	0.214	0.171	0.221	0.235	0.289	0.274	60S ribosomal protein L4-1-like [Brassica oleracea var. oleracea]
GSBRNA2T00134366001	BnaC03g02050D	821	C	plasma membrane	0.388	0.464		0.658	0.777		cellulose synthase A catalytic subunit 3 [UDP-forming]-like [Brassica napus]
GSBRNA2T00134536001	BnaC03g03440D	166	C	chloroplast	0.351	0.277	0.309	0.56	0.526	0.546	porphobilinogen deaminase, chloroplastic-like [Brassica napus]
GSBRNA2T00134536001	BnaC03g03440D	300	C	chloroplast	0.373			0.488			porphobilinogen deaminase, chloroplastic-like [Brassica napus]
GSBRNA2T00134647001	BnaC09g05970D	167	C	chloroplast	0.235	0.261	0.315	0.348	0.366	0.449	glutamate-1-semialdehyde 2,1-aminomutase, chloroplastic-like [Brassica napus]
GSBRNA2T00134656001	BnaC09g06050D	20	C	cytoplasm	0.616	0.673		0.763	0.792		pyruvate kinase, cytosolic isozyme-like isoform X2 [Brassica napus]
GSBRNA2T00134702001	BnaC09g06400D	451	C	chloroplast	0.435	0.412		0.508	0.466		beta-D-xylosidase 4 [Brassica oleracea var. oleracea]
GSBRNA2T00135010001	BnaC09g08390D	173	C	chloroplast	0.306			0.395			36.4 kDa proline-rich protein [Brassica oleracea var. oleracea]
GSBRNA2T00135010001	BnaC09g08390D	183	C	chloroplast			0.146	0.197		0.304	36.4 kDa proline-rich protein [Brassica oleracea var. oleracea]
GSBRNA2T00135010001	BnaC09g08390D	218	C	chloroplast	0.213	0.215	0.26	0.202	0.429	0.129	36.4 kDa proline-rich protein [Brassica oleracea var. oleracea]
GSBRNA2T00135010001	BnaC09g08390D	220	C	chloroplast	0.213	0.215	0.26	0.202	0.429	0.129	36.4 kDa proline-rich protein [Brassica oleracea var. oleracea]
GSBRNA2T00135010001	BnaC09g08390D	244	C	chloroplast	0.159	0.114	0.062	0.241	0.135	0.138	36.4 kDa proline-rich protein [Brassica oleracea var. oleracea]
GSBRNA2T00135010001	BnaC09g08390D	254	C	chloroplast	0.236	0.215	0.159	0.293	0.286	0.255	36.4 kDa proline-rich protein [Brassica oleracea var. oleracea]
GSBRNA2T00135397001	BnaA10g17770D	65	C	chloroplast	0.189	0.171		0.165	0.172		glutathione S-transferase DHAR3, chloroplastic-like [Brassica napus]
GSBRNA2T00135397001	BnaA10g17770D	68	C	chloroplast	0.189	0.171		0.165	0.172		glutathione S-transferase DHAR3, chloroplastic-like [Brassica napus]
GSBRNA2T00135468001	BnaA10g18270D	55	C	chloroplast	0.248	0.246	0.201	0.283	0.359	0.32	COX assembly mitochondrial protein 2-like [Brassica napus]
GSBRNA2T00135520001	BnaA10g18700D	239	C	chloroplast		0.521			0.685		UDP-glucose 6-dehydrogenase 3-like [Brassica napus]
GSBRNA2T00135625001	BnaA10g19590D	11	C	cytoplasm			0.526			0.598	mitochondrial phosphate carrier protein 3, mitochondrial-like [Brassica napus]
GSBRNA2T00135657001	BnaA10g19870D	123	C	chloroplast			0.181			0.247	ADP,ATP carrier protein 1, mitochondrial-like [Brassica rapa]
GSBRNA2T00135657001	BnaA10g19870D	248	C	chloroplast		0.486	0.499		0.52	0.52	ADP,ATP carrier protein 1, mitochondrial-like [Brassica rapa]
GSBRNA2T00135723001	BnaA10g20420D	69	C	nucleus			0.34			0.758	---
GSBRNA2T00135723001	BnaA10g20420D	251	C	nucleus			0.079				---
GSBRNA2T00135723001	BnaA10g20420D	252	C	nucleus			0.079				---
GSBRNA2T00135759001	BnaA10g20730D	78	C	chloroplast	0.182	0.14		0.209	0.256	0.09	diaminopimelate decarboxylase 2, chloroplastic-like [Brassica napus]
GSBRNA2T00135952001	BnaA10g22340D	259	C	cytoskeleton	0.513			0.846			actin-7-like [Brassica napus]
GSBRNA2T00136042001	BnaA10g23080D	170	C	chloroplast		0.223	0.212		0.395	0.397	porphobilinogen deaminase, chloroplastic [Brassica napus]
GSBRNA2T00136042001	BnaA10g23080D	304	C	chloroplast		0.402	0.26		0.436	0.318	porphobilinogen deaminase, chloroplastic [Brassica napus]
GSBRNA2T00136042001	BnaA10g23080D	332	C	chloroplast			0.317			0.418	porphobilinogen deaminase, chloroplastic [Brassica napus]
GSBRNA2T00136102001	BnaA10g23570D	48	C	cytoplasm	0.276	0.229	0.168	0.369	0.424	0.495	40S ribosomal protein S4-1-like [Brassica napus]
GSBRNA2T00136111001	BnaA10g23640D	162	C	nucleus	0.306			0.426			gibberellin 20 oxidase 3-like [Brassica napus]
GSBRNA2T00136396001	BnaA10g26060D	130	C	chloroplast	0.254		0.269	0.332		0.23	ferredoxin-dependent glutamate synthase 1, chloroplastic/mitochondrial [Brassica napus]
GSBRNA2T00136396001	BnaA10g26060D	451	C	chloroplast	0.143	0.165	0.139	0.213	0.191	0.143	ferredoxin-dependent glutamate synthase 1, chloroplastic/mitochondrial [Brassica napus]
GSBRNA2T00136396001	BnaA10g26060D	694	C	chloroplast	0.077	0.077	0.092	0.148	0.129	0.078	ferredoxin-dependent glutamate synthase 1, chloroplastic/mitochondrial [Brassica napus]
GSBRNA2T00136396001	BnaA10g26060D	970	C	chloroplast	0.476	0.493	0.346	0.558	0.565	0.468	ferredoxin-dependent glutamate synthase 1, chloroplastic/mitochondrial [Brassica napus]
GSBRNA2T00136396001	BnaA10g26060D	1241	C	chloroplast	0.078	0.229	0.119	0.129	0.295	0.017	ferredoxin-dependent glutamate synthase 1, chloroplastic/mitochondrial [Brassica napus]
GSBRNA2T00136396001	BnaA10g26060D	1246	C	chloroplast	0.078	0.229	0.119	0.129	0.295	0.017	ferredoxin-dependent glutamate synthase 1, chloroplastic/mitochondrial [Brassica napus]
GSBRNA2T00136396001	BnaA10g26060D	1499	C	chloroplast	0.072	0.172	0.048	0.034			ferredoxin-dependent glutamate synthase 1, chloroplastic/mitochondrial [Brassica napus]
GSBRNA2T00136396001	BnaA10g26060D	1500	C	chloroplast	0.072	0.172	0.048	0.034			ferredoxin-dependent glutamate synthase 1, chloroplastic/mitochondrial [Brassica napus]
GSBRNA2T00136396001	BnaA10g26060D	1507	C	chloroplast	0.072	0.172	0.048	0.034			ferredoxin-dependent glutamate synthase 1, chloroplastic/mitochondrial [Brassica napus]
GSBRNA2T00136468001	BnaA10g26640D	335	C	cytoplasm			0.416			0.751	---
GSBRNA2T00136679001	BnaC08g38540D	472	C	vacuolar membrane	0.39	0.356	0.315	0.537	0.471	0.387	nuclear protein [Arabidopsis thaliana]
GSBRNA2T00136963001	BnaC08g36130D	227	C	chloroplast	0.306	0.323	0.268	0.441	0.39	0.564	protein THYLAKOID FORMATION 1, chloroplastic-like [Brassica napus]
GSBRNA2T00137347001	BnaA03g35760D	175	C	chloroplast	0.373			0.355			reactive Intermediate Deaminase A, chloroplastic-like isoform X2 [Brassica rapa]
GSBRNA2T00137491001	BnaA03g34510D	20	C	cytoskeleton	0.058	0.202	0.096	0.082	0.136		S-adenosylmethionine synthase 2 [Brassica napus]
GSBRNA2T00137491001	BnaA03g34510D	31	C	cytoskeleton	0.058	0.202	0.096	0.082	0.136		S-adenosylmethionine synthase 2 [Brassica napus]
GSBRNA2T00137491001	BnaA03g34510D	42	C	cytoskeleton	0.129			0.04			S-adenosylmethionine synthase 2 [Brassica napus]
GSBRNA2T00137491001	BnaA03g34510D	45	C	cytoskeleton	0.129			0.04			S-adenosylmethionine synthase 2 [Brassica napus]
GSBRNA2T00137491001	BnaA03g34510D	90	C	cytoskeleton	0.262		0.228	0.283	0.205	0.268	S-adenosylmethionine synthase 2 [Brassica napus]
GSBRNA2T00137660001	BnaA03g33070D	121	C	mitochondria		0.289		0.384	0.424		chaperonin CPN60-like 2, mitochondrial [Brassica napus]
GSBRNA2T00137660001	BnaA03g33070D	134	C	mitochondria		0.289		0.384	0.424		chaperonin CPN60-like 2, mitochondrial [Brassica napus]
GSBRNA2T00137983001	BnaC07g01510D	18	C	chloroplast	0.326		0.263	0.46		0.446	60S ribosomal protein L28-1-like [Brassica napus]
GSBRNA2T00138165001	BnaC01g12740D	124	C	chloroplast		0.351			0.41		receptor-interacting protein [Arabidopsis thaliana]
GSBRNA2T00138232001	BnaC01g13210D	185	C	chloroplast		0.566			0.848		peptide methionine sulfoxide reductase B5-like isoform X1 [Brassica oleracea var. oleracea]
GSBRNA2T00138775001	BnaA03g22780D	323	C	chloroplast			0.152			0.199	protein TIC 55, chloroplastic [Brassica napus]
GSBRNA2T00138775001	BnaA03g22780D	359	C	chloroplast	0.344	0.242		0.402	0.438	0.215	protein TIC 55, chloroplastic [Brassica napus]
GSBRNA2T00138891001	BnaA03g21770D	70	C	chloroplast			0.068				---
GSBRNA2T00138891001	BnaA03g21770D	79	C	chloroplast			0.068				---
GSBRNA2T00138891001	BnaA03g21770D	112	C	chloroplast			0.11			0.03	---
GSBRNA2T00138891001	BnaA03g21770D	121	C	chloroplast			0.11			0.03	---
GSBRNA2T00138957001	BnaA03g21160D	193	C	cytoplasm			0.142			0.608	---
GSBRNA2T00138964001	BnaA03g21100D	49	C	extracellular		0.467	0.449		0.57	0.641	14 kDa proline-rich protein DC2.15-like [Brassica napus]
GSBRNA2T00138964001	BnaA03g21100D	130	C	extracellular	0.19	0.163	0.103	0.208	0.173	0.126	14 kDa proline-rich protein DC2.15-like [Brassica napus]
GSBRNA2T00139004001	BnaA03g20770D	325	C	mitochondria		0.825			0.924		---
GSBRNA2T00139134001	BnaC07g22680D	694	C	chloroplast		0.157	0.233		0.273	0.34	heat shock protein 83-like [Brassica napus]
GSBRNA2T00139757001	BnaC08g16710D	487	C	chloroplast	0.633	0.535	0.546	0.777	0.93	0.882	ADP,ATP carrier protein 2, chloroplastic-like [Brassica napus]
GSBRNA2T00139919001	BnaC08g07340D	120	C	cytoplasm			0.652			0.673	50S ribosomal protein L11, chloroplastic [Raphanus sativus]
GSBRNA2T00140086001	BnaC08g07850D	105	C	chloroplast	0.11			0.158			phosphoribulokinase, chloroplastic-like [Brassica napus]
GSBRNA2T00140086001	BnaC08g07850D	294	C	chloroplast	0.129			0.173			phosphoribulokinase, chloroplastic-like [Brassica napus]
GSBRNA2T00140086001	BnaC08g07850D	300	C	chloroplast	0.258			0.385			phosphoribulokinase, chloroplastic-like [Brassica napus]
GSBRNA2T00140666001	BnaC03g08690D	328	C	cytoplasm						0.264	---
GSBRNA2T00140666001	BnaC03g08690D	522	C	cytoplasm			0.396			0.467	---
GSBRNA2T00140666001	BnaC03g08690D	733	C	cytoplasm			0.213			0.324	---
GSBRNA2T00141424001	BnaC04g10770D	102	C	chloroplast		0.143	0.183		0.193	0.172	---
GSBRNA2T00141424001	BnaC04g10770D	112	C	chloroplast		0.238	0.192		0.298	0.239	---
GSBRNA2T00141705001	BnaC03g50160D	153	C	chloroplast	0.302	0.257	0.157	0.349	0.323	0.312	glutamate--tRNA ligase, chloroplastic/mitochondrial-like [Brassica napus]
GSBRNA2T00141705001	BnaC03g50160D	155	C	chloroplast	0.302	0.257	0.157	0.349	0.323	0.312	glutamate--tRNA ligase, chloroplastic/mitochondrial-like [Brassica napus]
GSBRNA2T00141766001	BnaC03g49710D	124	C	nucleus		0.123	0.07	0.05	0.078	0.062	phosphoglycerate mutase-like protein 1 [Brassica oleracea var. oleracea]
GSBRNA2T00141766001	BnaC03g49710D	133	C	nucleus		0.123	0.07	0.05	0.078	0.062	phosphoglycerate mutase-like protein 1 [Brassica oleracea var. oleracea]
GSBRNA2T00141806001	BnaA03g16750D	107	C	cytoplasm						0.354	bifunctional enolase 2/transcriptional activator-like isoform X2 [Brassica napus]
GSBRNA2T00141806001	BnaA03g16750D	303	C	cytoplasm			0.337			0.268	bifunctional enolase 2/transcriptional activator-like isoform X2 [Brassica napus]
GSBRNA2T00141918001	BnaA03g15830D	102	C	chloroplast	0.18			0.173			chlorophyll a-b binding protein 1, chloroplastic [Brassica napus]
GSBRNA2T00141918001	BnaA03g15830D	112	C	chloroplast	0.238			0.308			chlorophyll a-b binding protein 1, chloroplastic [Brassica napus]
GSBRNA2T00142068001	BnaA03g14550D	119	C	cytoplasm	0.284			0.46			40S ribosomal protein S3-2 [Brassica napus]
GSBRNA2T00142211001	BnaA03g13420D	206	C	cytoplasm	0.446	0.309	0.412	0.521	0.443	0.517	chaperone protein ClpC1, chloroplastic [Brassica napus]
GSBRNA2T00142211001	BnaA03g13420D	312	C	cytoplasm	0.117	0.255		0.143	0.203		chaperone protein ClpC1, chloroplastic [Brassica napus]
GSBRNA2T00142241001	BnaC05g21440D	3	C	cytoplasm			0.221			0.256	---
GSBRNA2T00142474001	BnaC05g20200D	57	C	cytoplasm	0.447		0.346	0.455		0.419	eukaryotic translation initiation factor 5A-2-like isoform X1 [Brassica oleracea var. oleracea]
GSBRNA2T00142474001	BnaC05g20200D	80	C	cytoplasm	0.288	0.298		0.362	0.592		eukaryotic translation initiation factor 5A-2-like isoform X1 [Brassica oleracea var. oleracea]
GSBRNA2T00142569001	BnaC07g08100D	205	C	chloroplast		0.395	0.385		0.633	0.488	probable plastid-lipid-associated protein 6, chloroplastic [Brassica napus]
GSBRNA2T00143088001	BnaC07g27160D	463	C	chloroplast	0.223	0.169	0.185	0.305	0.206	0.228	beta-D-xylosidase 1 [Brassica oleracea var. oleracea]
GSBRNA2T00143088001	BnaC07g27160D	468	C	chloroplast	0.223	0.169	0.185	0.305	0.206	0.228	beta-D-xylosidase 1 [Brassica oleracea var. oleracea]
GSBRNA2T00143112001	BnaC07g27340D	132	C	chloroplast	0.155		0.175	0.192		0.17	---
GSBRNA2T00143127001	BnaA02g03770D	328	C	cytoplasm	0.252	0.083		0.285	0.403		---
GSBRNA2T00143127001	BnaA02g03770D	522	C	cytoplasm	0.322	0.335		0.53	0.503		---
GSBRNA2T00143127001	BnaA02g03770D	580	C	cytoplasm	0.182	0.131		0.228	0.163		---
GSBRNA2T00143127001	BnaA02g03770D	733	C	cytoplasm	0.303	0.21		0.328	0.368		---
GSBRNA2T00143192001	BnaA02g03230D	65	C	chloroplast			0.16			0.137	---
GSBRNA2T00143192001	BnaA02g03230D	68	C	chloroplast			0.16			0.137	---
GSBRNA2T00143202001	BnaA02g03160D	358	C	cytoplasm		0.555			0.567		ABC transporter F family member 1-like [Brassica napus]
GSBRNA2T00143205001	BnaA02g03140D	92	C	cytoplasm		0.129			0.247		glutamine synthetase cytosolic isozyme 1-4-like [Brassica napus]
GSBRNA2T00143304001	BnaA02g02290D	96	C	cytoplasm	0.223	0.248	0.083	0.319	0.337	0.279	beta carbonic anhydrase 2, chloroplastic-like [Brassica napus]
GSBRNA2T00143304001	BnaA02g02290D	200	C	cytoplasm	0.119	0.133	0.075	0.168	0.245	0.08	beta carbonic anhydrase 2, chloroplastic-like [Brassica napus]
GSBRNA2T00143328001	BnaA02g02090D	58	C	cytoplasm			0.219			0.332	---
GSBRNA2T00143376001	BnaA02g01690D	62	C	chloroplast				0.237			---
GSBRNA2T00143515001	BnaA02g00540D	103	C	chloroplast		0.588			0.637		14-3-3-like protein GF14 lambda [Brassica napus]
GSBRNA2T00143523001	BnaA02g00470D	12	C	nucleus	0.471	0.365	0.308	0.596	0.656	0.657	40S ribosomal protein S6-2-like [Brassica napus]
GSBRNA2T00143523001	BnaA02g00470D	56	C	nucleus	0.192	0.218		0.55	0.424		40S ribosomal protein S6-2-like [Brassica napus]
GSBRNA2T00143523001	BnaA02g00470D	102	C	nucleus	1.006			0.652			40S ribosomal protein S6-2-like [Brassica napus]
GSBRNA2T00143554001	BnaA02g00190D	235	C	cytoskeleton		0.372		0.325			actin-7 [Brassica napus]
GSBRNA2T00143566001	BnaA02g00100D	147	C	cytoplasm	0.57	0.463	0.137	0.634	0.513	0.217	malate dehydrogenase 2, glyoxysomal [Brassica oleracea var. oleracea]
GSBRNA2T00143566001	BnaA02g00100D	284	C	cytoplasm	0.251	0.22	0.298	0.325	0.28	0.35	malate dehydrogenase 2, glyoxysomal [Brassica oleracea var. oleracea]
GSBRNA2T00143566001	BnaA02g00100D	297	C	cytoplasm		0.217					malate dehydrogenase 2, glyoxysomal [Brassica oleracea var. oleracea]
GSBRNA2T00144123001	BnaC03g56080D	342	C	cytoplasm			0.339			0.561	protein TOC75-3, chloroplastic [Brassica napus]
GSBRNA2T00144212001	BnaA06g28710D	362	C	cytoplasm		0.09			0.113		serine--tRNA ligase, cytoplasmic-like isoform X2 [Brassica rapa]
GSBRNA2T00144212001	BnaA06g28710D	365	C	cytoplasm		0.09			0.113		serine--tRNA ligase, cytoplasmic-like isoform X2 [Brassica rapa]
GSBRNA2T00144212001	BnaA06g28710D	404	C	cytoplasm	0.129	0.207	0.11	0.133	0.118	0.21	serine--tRNA ligase, cytoplasmic-like isoform X2 [Brassica rapa]
GSBRNA2T00144212001	BnaA06g28710D	405	C	cytoplasm	0.129	0.207	0.11	0.133	0.118	0.21	serine--tRNA ligase, cytoplasmic-like isoform X2 [Brassica rapa]
GSBRNA2T00144298001	BnaA06g29280D	198	C	cytoplasm	0.262	0.336	0.137	0.429	0.398	0.24	GDP-mannose 3,5-epimerase-like [Brassica napus]
GSBRNA2T00144298001	BnaA06g29280D	238	C	cytoplasm	0.276	0.263	0.14	0.357	0.363	0.236	GDP-mannose 3,5-epimerase-like [Brassica napus]
GSBRNA2T00144298001	BnaA06g29280D	249	C	cytoplasm			0.139			0.12	GDP-mannose 3,5-epimerase-like [Brassica napus]
GSBRNA2T00144298001	BnaA06g29280D	276	C	cytoplasm		0.313			0.439		GDP-mannose 3,5-epimerase-like [Brassica napus]
GSBRNA2T00144298001	BnaA06g29280D	304	C	cytoplasm	0.188	0.14	0.089	0.188	0.231	0.228	GDP-mannose 3,5-epimerase-like [Brassica napus]
GSBRNA2T00144393001	BnaA06g29980D	43	C	cytoplasm	0.215	0.17	0.223	0.217	0.092	0.231	60S ribosomal protein L13a-4 [Brassica napus]
GSBRNA2T00144393001	BnaA06g29980D	47	C	cytoplasm	0.215	0.17	0.223	0.217	0.092	0.231	60S ribosomal protein L13a-4 [Brassica napus]
GSBRNA2T00144412001	BnaA06g30160D	89	C	extracellular		0.108	0.081		0.052	0.066	cysteine-rich repeat secretory protein 55-like [Brassica napus]
GSBRNA2T00144412001	BnaA06g30160D	92	C	extracellular		0.108	0.081		0.052	0.066	cysteine-rich repeat secretory protein 55-like [Brassica napus]
GSBRNA2T00144412001	BnaA06g30160D	117	C	extracellular	0.245	0.274		0.242	0.274		cysteine-rich repeat secretory protein 55-like [Brassica napus]
GSBRNA2T00145101001	BnaC08g02020D	31	C	chloroplast	0.571			0.408			Ran-binding protein 2, Ran-binding domain protein [Medicago truncatula]
GSBRNA2T00145115001	BnaC08g01950D	188	C	chloroplast	0.21	0.143		0.178	0.131		protein TIC110, chloroplastic [Brassica oleracea var. oleracea]
GSBRNA2T00145115001	BnaC08g01950D	192	C	chloroplast	0.21	0.143		0.178	0.131		protein TIC110, chloroplastic [Brassica oleracea var. oleracea]
GSBRNA2T00145115001	BnaC08g01950D	546	C	chloroplast	0.239			0.105	0.077		protein TIC110, chloroplastic [Brassica oleracea var. oleracea]
GSBRNA2T00145115001	BnaC08g01950D	560	C	chloroplast	0.239			0.105	0.077		protein TIC110, chloroplastic [Brassica oleracea var. oleracea]
GSBRNA2T00145627001	BnaA09g22540D	129	C	chloroplast	0.341	0.321	0.36	0.412	0.479	0.317	chlorophyll a-b binding protein CP26, chloroplastic-like [Brassica napus]
GSBRNA2T00145774001	BnaC03g52250D	308	C	plasma membrane	0.222	0.238		0.276	0.391		calnexin homolog 1-like [Brassica napus]
GSBRNA2T00145774001	BnaC03g52250D	314	C	plasma membrane	0.222	0.238		0.276	0.391		calnexin homolog 1-like [Brassica napus]
GSBRNA2T00146079001	BnaC09g04730D	59	C	cytoplasm	0.436	0.471		0.722	0.795		40S ribosomal protein S11-3-like [Brassica napus]
GSBRNA2T00146079001	BnaC09g04730D	115	C	cytoplasm	0.183	0.239		0.271	0.301		40S ribosomal protein S11-3-like [Brassica napus]
GSBRNA2T00146079001	BnaC09g04730D	129	C	cytoplasm	0.107	0.083		0.305	0.234		40S ribosomal protein S11-3-like [Brassica napus]
GSBRNA2T00146270001	BnaA07g35670D	116	C	chloroplast				0.077			D-glycerate 3-kinase, chloroplastic-like [Brassica rapa]
GSBRNA2T00146270001	BnaA07g35670D	146	C	chloroplast	0.122	0.156	0.132	0.165	0.186	0.2	D-glycerate 3-kinase, chloroplastic-like [Brassica rapa]
GSBRNA2T00146344001	BnaA07g34980D	62	C	cytoplasm	0.738			0.718			phosphoglycerate kinase, cytosolic [Brassica napus]
GSBRNA2T00146351001	BnaA07g34930D	355	C	mitochondria	0.119			0.146			succinate-semialdehyde dehydrogenase, mitochondrial [Brassica napus]
GSBRNA2T00146351001	BnaA07g34930D	357	C	mitochondria	0.119			0.146			succinate-semialdehyde dehydrogenase, mitochondrial [Brassica napus]
GSBRNA2T00146580001	BnaA07g32950D	762	C	nucleus	0.325			0.434			tetratricopeptide repeat protein SKI3 isoform X1 [Brassica napus]
GSBRNA2T00146649001	BnaA07g32300D	223	C	chloroplast		0.186			0.085		---
GSBRNA2T00146649001	BnaA07g32300D	226	C	chloroplast		0.186			0.085		---
GSBRNA2T00146665001	BnaA07g32150D	43	C	extracellular				0.079		0.337	defensin-like protein 3 [Brassica napus]
GSBRNA2T00146665001	BnaA07g32150D	49	C	extracellular				0.079		0.337	defensin-like protein 3 [Brassica napus]
GSBRNA2T00146665001	BnaA07g32150D	73	C	extracellular	0.091	0.086	0.083	0.055	0.031	0.03	defensin-like protein 3 [Brassica napus]
GSBRNA2T00146665001	BnaA07g32150D	75	C	extracellular	0.091	0.086	0.083	0.055	0.031	0.03	defensin-like protein 3 [Brassica napus]
GSBRNA2T00146665001	BnaA07g32150D	79	C	extracellular	0.091	0.086	0.083	0.055	0.031	0.03	defensin-like protein 3 [Brassica napus]
GSBRNA2T00146924001	BnaC02g31500D	375	C	chloroplast	0.079						pectin acetylesterase 11 isoform X1 [Brassica oleracea var. oleracea]
GSBRNA2T00146924001	BnaC02g31500D	380	C	chloroplast	0.079						pectin acetylesterase 11 isoform X1 [Brassica oleracea var. oleracea]
GSBRNA2T00146924001	BnaC02g31500D	384	C	chloroplast	0.079						pectin acetylesterase 11 isoform X1 [Brassica oleracea var. oleracea]
GSBRNA2T00147464001	BnaA06g26420D	56	C	cytoplasm		0.273			0.301		tubulin beta-1 chain [Erythranthe guttata]
GSBRNA2T00147519001	BnaA06g26820D	544	C	chloroplast	0.322			0.646			starch synthase 1, chloroplastic/amyloplastic [Brassica napus]
GSBRNA2T00147827001	BnaC06g37640D	442	C	nucleus			0.357			0.587	trihelix transcription factor GT-2-like [Brassica oleracea var. oleracea]
GSBRNA2T00148028001	BnaC06g39250D	331	C	chloroplast				0.159			epidermis-specific secreted glycoprotein EP1-like [Brassica oleracea var. oleracea]
GSBRNA2T00148028001	BnaC06g39250D	337	C	chloroplast				0.159			epidermis-specific secreted glycoprotein EP1-like [Brassica oleracea var. oleracea]
GSBRNA2T00148028001	BnaC06g39250D	343	C	chloroplast				0.159			epidermis-specific secreted glycoprotein EP1-like [Brassica oleracea var. oleracea]
GSBRNA2T00148028001	BnaC06g39250D	348	C	chloroplast		0.214			0.374		epidermis-specific secreted glycoprotein EP1-like [Brassica oleracea var. oleracea]
GSBRNA2T00148028001	BnaC06g39250D	351	C	chloroplast		0.214			0.374		epidermis-specific secreted glycoprotein EP1-like [Brassica oleracea var. oleracea]
GSBRNA2T00148037001	BnaC06g39330D	248	C	cytoplasm	0.021	0.046			0.022		V-type proton ATPase catalytic subunit A-like [Brassica napus]
GSBRNA2T00148037001	BnaC06g39330D	256	C	cytoplasm	0.021	0.046			0.022		V-type proton ATPase catalytic subunit A-like [Brassica napus]
GSBRNA2T00148350001	BnaC04g17110D	186	C	cytoskeleton		0.467			0.756		---
GSBRNA2T00148362001	BnaC04g17180D	251	C	chloroplast	0.238	0.186		0.323	0.448		4-diphosphocytidyl-2-C-methyl-D-erythritol kinase, chloroplastic [Brassica oleracea var. oleracea]
GSBRNA2T00148640001	BnaA03g10440D	148	C	mitochondria		0.182			0.23		lactoylglutathione lyase family protein [Arabidopsis lyrata subsp. lyrata]
GSBRNA2T00148707001	BnaA03g09850D	187	C	chloroplast	0.258			0.419			NAD(P)H-quinone oxidoreductase subunit N, chloroplastic-like [Brassica napus]
GSBRNA2T00148712001	BnaA03g09800D	419	C	chloroplast		0.062			0.127		malate dehydrogenase [NADP], chloroplastic-like [Brassica napus]
GSBRNA2T00148712001	BnaA03g09800D	431	C	chloroplast		0.062			0.127		malate dehydrogenase [NADP], chloroplastic-like [Brassica napus]
GSBRNA2T00148741001	BnaA03g09560D	243	C	chloroplast	0.34	0.39		0.759	0.357		UDP-glucuronic acid decarboxylase 3 [Brassica napus]
GSBRNA2T00148813001	BnaA03g08920D	66	C	cytoplasm	0.308	0.317	0.288	0.375	0.397	0.372	elongation factor 1-alpha 1-like [Brassica napus]
GSBRNA2T00148813001	BnaA03g08920D	129	C	cytoplasm	0.16	0.169	0.185	0.006	0.034	0.017	elongation factor 1-alpha 1-like [Brassica napus]
GSBRNA2T00148813001	BnaA03g08920D	130	C	cytoplasm	0.16	0.169	0.185	0.006	0.034	0.017	elongation factor 1-alpha 1-like [Brassica napus]
GSBRNA2T00148813001	BnaA03g08920D	131	C	cytoplasm	0.16	0.169	0.185	0.006	0.034	0.017	elongation factor 1-alpha 1-like [Brassica napus]
GSBRNA2T00148946001	BnaA03g07840D	474	C	cytoplasm		0.132	0.144		0.224	0.202	26S protease regulatory subunit 8 homolog A-like [Brassica rapa]
GSBRNA2T00148946001	BnaA03g07840D	523	C	cytoplasm	0.17	0.143	0.191	0.179	0.224	0.16	26S protease regulatory subunit 8 homolog A-like [Brassica rapa]
GSBRNA2T00148946001	BnaA03g07840D	531	C	cytoplasm	0.17	0.143	0.191	0.179	0.224	0.16	26S protease regulatory subunit 8 homolog A-like [Brassica rapa]
GSBRNA2T00148962001	BnaA03g07760D	830	C	chloroplast		0.078			0.122	0.116	importin-5-like [Brassica napus]
GSBRNA2T00148962001	BnaA03g07760D	839	C	chloroplast		0.078			0.122	0.116	importin-5-like [Brassica napus]
GSBRNA2T00148992001	BnaA03g07490D	190	C	cytoplasm	0.353			0.47			---
GSBRNA2T00149240001	BnaA04g00820D	23	C	cytoplasm	0.207			0.251			(+)-neomenthol dehydrogenase-like isoform X2 [Brassica napus]
GSBRNA2T00149261001	BnaA04g00660D	97	C	chloroplast	0.288	0.219	0.172	0.352	0.256	0.183	photosystem I chlorophyll a/b-binding protein 2, chloroplastic-like [Brassica rapa]
GSBRNA2T00149450001	BnaA01g16440D	116	C	chloroplast	0.468	0.459		0.703	0.663		---
GSBRNA2T00149450001	BnaA01g16440D	168	C	chloroplast		0.27			0.748		---
GSBRNA2T00149551001	BnaA01g15640D	197	C	cytoplasm			0.409			0.366	---
GSBRNA2T00149645001	BnaA01g14880D	302	C	plasma membrane		0.549			0.65		protochlorophyllide-dependent translocon component 52, chloroplastic-like [Brassica napus]
GSBRNA2T00149960001	BnaC03g45180D	181	C	cytoplasm	0.195			0.202			serine--glyoxylate aminotransferase-like [Brassica oleracea var. oleracea]
GSBRNA2T00149960001	BnaC03g45180D	213	C	cytoplasm	0.192			0.34			serine--glyoxylate aminotransferase-like [Brassica oleracea var. oleracea]
GSBRNA2T00150276001	BnaA10g02610D	66	C	cytoplasm			0.395			0.619	---
GSBRNA2T00150280001	BnaA10g02570D	287	C	chloroplast		0.779			0.635		protein tas [Brassica napus]
GSBRNA2T00150281001	BnaA10g02560D	125	C	cytoplasm	0.199			0.253			malate dehydrogenase, cytoplasmic 1-like [Brassica napus]
GSBRNA2T00150281001	BnaA10g02560D	155	C	cytoplasm	0.206			0.235			malate dehydrogenase, cytoplasmic 1-like [Brassica napus]
GSBRNA2T00150281001	BnaA10g02560D	252	C	cytoplasm	0.181			0.261			malate dehydrogenase, cytoplasmic 1-like [Brassica napus]
GSBRNA2T00150419001	BnaA10g01470D	95	C	chloroplast		0.539			0.756		HSP20-like chaperones superfamily protein [Arabidopsis thaliana]
GSBRNA2T00150548001	BnaA10g00370D	373	C	plasma membrane	0.211			0.16			glycerol-3-phosphate 2-O-acyltransferase 4-like [Brassica napus]
GSBRNA2T00150548001	BnaA10g00370D	379	C	plasma membrane	0.211			0.16			glycerol-3-phosphate 2-O-acyltransferase 4-like [Brassica napus]
GSBRNA2T00150716001	BnaA08g18140D	332	C	chloroplast	0.235	0.229	0.131	0.215	0.256	0.261	26S proteasome non-ATPase regulatory subunit 11 homolog [Brassica napus]
GSBRNA2T00150758001	BnaA08g17820D	295	C	chloroplast		0.108			0.058		GDSL esterase/lipase At1g29670 [Brassica rapa]
GSBRNA2T00150758001	BnaA08g17820D	296	C	chloroplast		0.108			0.058		GDSL esterase/lipase At1g29670 [Brassica rapa]
GSBRNA2T00150758001	BnaA08g17820D	307	C	chloroplast	0.056	0.094			0.147		GDSL esterase/lipase At1g29670 [Brassica rapa]
GSBRNA2T00150758001	BnaA08g17820D	314	C	chloroplast	0.056	0.094			0.147		GDSL esterase/lipase At1g29670 [Brassica rapa]
GSBRNA2T00150826001	BnaA08g17260D	75	C	nucleus	0.111	0.307		0.079	0.284		60S ribosomal protein L36a-like [Brassica napus]
GSBRNA2T00150826001	BnaA08g17260D	78	C	nucleus	0.111	0.307		0.079	0.284		60S ribosomal protein L36a-like [Brassica napus]
GSBRNA2T00150881001	BnaA08g16820D	69	C	chloroplast	0.554	0.565	0.528	0.552	0.523	0.561	probable fructose-bisphosphate aldolase 2, chloroplastic [Brassica napus]
GSBRNA2T00150881001	BnaA08g16820D	153	C	chloroplast	0.083	0.066	0.175	0.277	0.158	0.274	probable fructose-bisphosphate aldolase 2, chloroplastic [Brassica napus]
GSBRNA2T00150881001	BnaA08g16820D	330	C	chloroplast	0.331	0.428	0.357	0.383	0.475	0.334	probable fructose-bisphosphate aldolase 2, chloroplastic [Brassica napus]
GSBRNA2T00151027001	BnaA03g43610D	94	C	cytoplasm	0.334	0.182	0.138	0.439	0.355	0.283	60S ribosomal protein L32-1 [Brassica napus]
GSBRNA2T00151094001	BnaA03g43030D	134	C	chloroplast	0.498	0.648	0.366	0.618	0.674	0.484	60S ribosomal protein L15-1-like [Brassica napus]
GSBRNA2T00151201001	BnaA03g42140D	90	C	extracellular	0.241			0.252			protein RALF-like 33 [Brassica rapa]
GSBRNA2T00151445001	BnaA03g24330D	55	C	cytoplasm	0.719	0.395	0.578	0.7	0.495	0.525	RmlC-like cupins superfamily protein [Arabidopsis thaliana]
GSBRNA2T00151448001	BnaA03g24350D	141	C	chloroplast		0.23	0.255		0.357	0.283	---
GSBRNA2T00151596001	BnaA03g25540D	140	C	chloroplast	0.317	0.122	0.163	0.424	0.347	0.284	ATP synthase gamma chain 1, chloroplastic [Brassica napus]
GSBRNA2T00151596001	BnaA03g25540D	250	C	chloroplast	0.095	0.12	0.106	0.031	0.023	0.027	ATP synthase gamma chain 1, chloroplastic [Brassica napus]
GSBRNA2T00151596001	BnaA03g25540D	256	C	chloroplast	0.095	0.12	0.106	0.031	0.023	0.027	ATP synthase gamma chain 1, chloroplastic [Brassica napus]
GSBRNA2T00151647001	BnaA03g25920D	137	C	mitochondria	0.25	0.172	0.185	0.309	0.232	0.249	elongation factor Tu, mitochondrial-like [Brassica napus]
GSBRNA2T00151671001	BnaA03g26110D	130	C	chloroplast	0.223	0.221	0.174	0.379	0.268	0.298	NADH dehydrogenase [ubiquinone] flavoprotein 2, mitochondrial [Brassica napus]
GSBRNA2T00151671001	BnaA03g26110D	135	C	chloroplast	0.223	0.221	0.174	0.379	0.268	0.298	NADH dehydrogenase [ubiquinone] flavoprotein 2, mitochondrial [Brassica napus]
GSBRNA2T00151677001	BnaA03g26170D	98	C	chloroplast		0.292	0.225		0.393	0.384	HSP20-like chaperones superfamily protein [Arabidopsis thaliana]
GSBRNA2T00151695001	BnaA03g26280D	228	C	nucleus			0.244			0.313	---
GSBRNA2T00151751001	BnaC02g06060D	382	C	chloroplast		0.709			0.957		chaperone protein ClpB3, chloroplastic-like [Brassica napus]
GSBRNA2T00151763001	BnaC02g05960D	56	C	chloroplast				0.187			gibberellin-regulated protein 4-like [Brassica napus]
GSBRNA2T00151763001	BnaC02g05960D	65	C	chloroplast				0.187			gibberellin-regulated protein 4-like [Brassica napus]
GSBRNA2T00151763001	BnaC02g05960D	69	C	chloroplast				0.187			gibberellin-regulated protein 4-like [Brassica napus]
GSBRNA2T00151765001	BnaC02g05940D	5	C	nucleus	0.206	0.17	0.193	0.23	0.192	0.227	40S ribosomal protein S9-1 [Brassica napus]
GSBRNA2T00151844001	BnaC02g05260D	134	C	chloroplast	0.241	0.2		0.341	0.34		30S ribosomal protein S13, chloroplastic-like isoform X2 [Brassica napus]
GSBRNA2T00151863001	BnaC02g05120D	91	C	chloroplast	0.641	0.848		0.682	0.866		---
GSBRNA2T00151863001	BnaC02g05120D	136	C	chloroplast		0.423			0.815		---
GSBRNA2T00152011001	BnaC02g03980D	264	C	cytoplasm		0.287			0.394		NADP-dependent malic enzyme 2-like [Brassica napus]
GSBRNA2T00152011001	BnaC02g03980D	578	C	cytoplasm	0.381	0.596	0.381	0.42	0.672	0.394	NADP-dependent malic enzyme 2-like [Brassica napus]
GSBRNA2T00152253001	BnaC09g26840D	20	C	chloroplast	0.169	0.108	0.114	0.122	0.034	0.04	photosystem I subunit VII (plastid) [Tofieldia thibetica]
GSBRNA2T00152253001	BnaC09g26840D	23	C	chloroplast	0.169	0.108	0.114	0.122	0.034	0.04	photosystem I subunit VII (plastid) [Tofieldia thibetica]
GSBRNA2T00152253001	BnaC09g26840D	26	C	chloroplast	0.091	0.1	0.11	0.024	0.033	0.029	photosystem I subunit VII (plastid) [Tofieldia thibetica]
GSBRNA2T00152253001	BnaC09g26840D	30	C	chloroplast	0.091	0.1	0.11	0.024	0.033	0.029	photosystem I subunit VII (plastid) [Tofieldia thibetica]
GSBRNA2T00152633001	BnaC04g08040D	98	C	chloroplast	0.133	0.115	0.111	0.043	0.04	0.052	thioredoxin-like protein AAED1, chloroplastic [Brassica napus]
GSBRNA2T00152633001	BnaC04g08040D	101	C	chloroplast	0.133	0.115	0.111	0.043	0.04	0.052	thioredoxin-like protein AAED1, chloroplastic [Brassica napus]
GSBRNA2T00152637001	BnaC04g08010D	69	C	cytoskeleton	0.334	0.315	0.389	0.727	0.74	0.678	40S ribosomal protein S5-1-like [Brassica napus]
GSBRNA2T00152637001	BnaC04g08010D	175	C	cytoskeleton	0.094	0.195		0.24	0.263	0.14	40S ribosomal protein S5-1-like [Brassica napus]
GSBRNA2T00152825001	BnaC04g06750D	14	C	chloroplast	0.215	0.143	0.093	0.237	0.152	0.068	non-specific lipid-transfer protein A-like [Brassica napus]
GSBRNA2T00152825001	BnaC04g06750D	15	C	chloroplast	0.215	0.143	0.093	0.237	0.152	0.068	non-specific lipid-transfer protein A-like [Brassica napus]
GSBRNA2T00152915001	BnaC02g16260D	192	C	cytoplasm	0.515			0.552			methionine S-methyltransferase [Brassica napus]
GSBRNA2T00153210001	BnaC08g06360D	159	C	mitochondria				0.074	0.098		ADP-ribosylation factor 1-like isoform X3 [Brassica napus]
GSBRNA2T00153406001	BnaC03g31130D	49	C	cytoplasm	0.342			0.587			ribosomal protein S3 (chloroplast) [Brassica juncea]
GSBRNA2T00153406001	BnaC03g31130D	140	C	cytoplasm	0.402	0.439	0.456	0.419	0.6	0.588	ribosomal protein S3 (chloroplast) [Brassica juncea]
GSBRNA2T00153407001	BnaC03g31140D	54	C	chloroplast	0.454	0.438	0.361	0.549	0.56	0.546	ribosomal protein L22 (chloroplast) [Brassica juncea]
GSBRNA2T00153511001	BnaC03g31890D	90	C	chloroplast	0.178	0.369	0.144	0.231	0.417	0.51	50S ribosomal protein L5, chloroplastic [Brassica oleracea var. oleracea]
GSBRNA2T00153635001	BnaC03g32850D	113	C	cytoplasm	0.469	0.272		0.544	0.439		UDP-arabinopyranose mutase 1-like [Brassica rapa]
GSBRNA2T00153730001	BnaC03g33630D	25	C	cytoplasm		0.366			0.509		40S ribosomal protein S16-3-like [Brassica napus]
GSBRNA2T00153739001	BnaC03g33700D	56	C	chloroplast	0.363			0.567			60S ribosomal protein L23 [Brassica napus]
GSBRNA2T00153739001	BnaC03g33700D	125	C	chloroplast	0.369	0.327		0.562	0.513		60S ribosomal protein L23 [Brassica napus]
GSBRNA2T00153908001	BnaA05g22070D	138	C	nucleus	0.218	0.279	0.212	0.411	0.377	0.331	receptor for activated C kinase 1C-like [Brassica napus]
GSBRNA2T00153908001	BnaA05g22070D	250	C	nucleus		0.194			0.271		receptor for activated C kinase 1C-like [Brassica napus]
[truncated: 107 more rows]

## Sheet: Sheet3
Table S3. Expression level of sites and proteins in control and freezing-stressed conditions.
[truncated: 858 more rows]

[truncated: 7 more sheets: Table S4, Table S5, Table S6, Table S7, Table S8, Table S9, Table S10]
